# Supplementary material for: Genetic architecture of heart mitochondrial proteome influencing cardiac hypertrophy
Source: eLife journal article supplement (doi:10.7554/elife.82619), 2023-05-19
Supplement: fig2-data1 [file elife-82619-fig2-data1-v1.pdf]

Figure 2, panel J

Original – uncropped

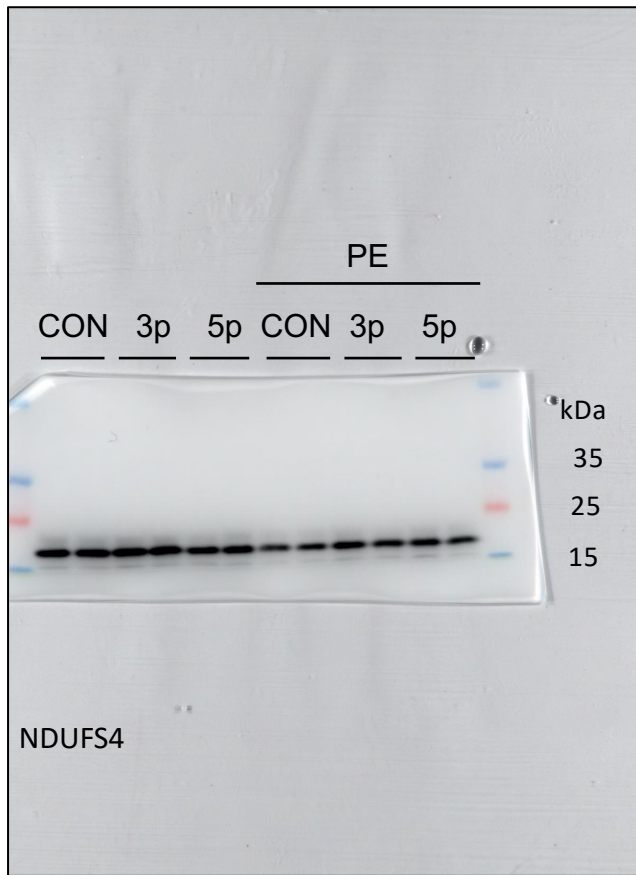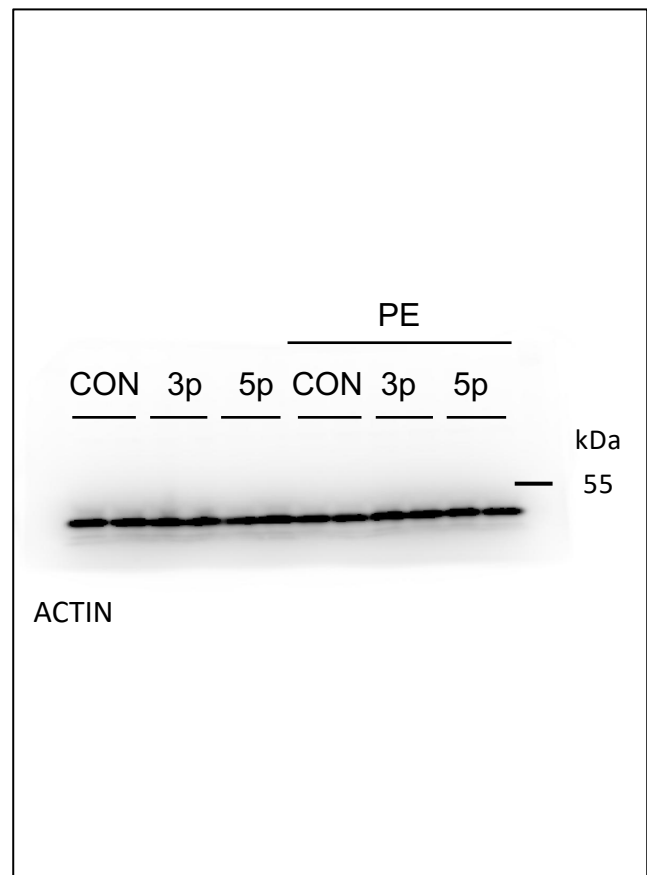

**Samples:** CON, CON, miR-27b-3p, miR-27b-3p, miR-27b-5p, miR-27b-5p  
CON (PE), CON (PE), miR-27b-3p (PE), miR-27b-3p (PE), miR-27b-5p (PE), miR-27b-5p (PE)
