# Supplementary material for: Genetic architecture of heart mitochondrial proteome influencing cardiac hypertrophy
Source: eLife. 2023 Jun 5;12:e82619. doi: 10.7554/eLife.82619 (PMC10241513; doi:10.7554/eLife.82619)
Supplement: Figure 3—source data 1. — Association p values between mtDNA-encoded mRNA expression or protein abundance levels and peak SNP (rs46340181) associated with chr17 locus in both sexes of HMDP. p Values were calculated using FaST-LMM that uses Likelihood-Ratio test. [file elife-82619-fig3-data1.xlsx]

## Sheet: Figure 3H
Symbol	P value @chr17 (rs46340181)
	Chow F Protein	HF/HS F RNA	HF/HS M RNA
mt-ND1	0.000127	4.2e-11	6.26e-12
mt-ND2	0.037	1.29e-05	8.28e-05
mt-ND3	0.009	0.005	2.3e-07
mt-ND4	0.069	0.004	0.078
mt-ND4L	0.234	0.018	0.498
mt-ND5	0.099	2.71e-06	0.000302
mt-ND6	-	1.03e-15	6.62e-13
mt-CYTB	0.129	0.001	0.002
mt-CO1	0.831	0.013	0.575
mt-CO2	0.403	1.46e-05	1.2e-08
mt-CO3	0.411	2.31e-06	4.77e-10
mt-ATP6	0.249	0.265	0.338
mt-ATP8	0.41	0.126	0.611
LRPPRC	2.54e-17	0.008	0.216
SLIRP	9.57e-13	0.000823	0.144
