# Supplementary material for: Genetic architecture of heart mitochondrial proteome influencing cardiac hypertrophy
Source: eLife. 2023 Jun 5;12:e82619. doi: 10.7554/eLife.82619 (PMC10241513; doi:10.7554/eLife.82619)
Supplement: Figure 3—source data 2. — Association p values between mtDNA-encoded complex-I related mRNA expression or protein abundance levels and peak SNP (rs48592660) associated with chr13 locus in both sexes of HMDP. p Values were calculated using FaST-LMM that uses Likelihood-Ratio test. [file elife-82619-fig3-data2.xlsx]

## Sheet: Figure 3J
Symbol	P value @chr13 (rs48592660)
	Chow F Protein	HF/HS F RNA	HF/HS M RNA
mt-ND1	5.05e-06	0.039	0.016
mt-ND2	1.7e-07	0.138	0.021
mt-ND3	0.023	0.638	0.197
mt-ND4	8.05e-06	0.849	0.525
mt-ND4L	0.011	0.018	0.498
mt-ND5	0.003	0.656	0.473
mt-ND6	-	0.826	0.598
NDUFS4	1.34e-06	0.443	0.905
NDUFAF2	0.002	0.636	0.93
