# Supplementary material for: Genetic architecture of heart mitochondrial proteome influencing cardiac hypertrophy
Source: eLife. 2023 Jun 5;12:e82619. doi: 10.7554/eLife.82619 (PMC10241513; doi:10.7554/eLife.82619)
Supplement: Supplementary file 1. — (a) List of HMDP strains used for proteomic analyses and their respective genotypes at the three loci. (b) Five modules of WGCNA and their corresponding proteins. (c) List of proteins associated with chr13 locus listed in Figure 2A. The associated P values between the respective proteins and chr13 locus eigengene pSNP are listed. (d) List of proteins associated with chr17 locus listed in Figure 3A. The associated P values between the respective proteins and chr17 locus eigengene pSNP are listed. (e) List of proteins associated with chr7 locus listed in Figure 4A. The associated P values between the respective proteins and chr7 locus eigengene pSNP are listed. (f) Scoring of miRNA targeting Ndufs4 by nine algorithms and one dataset of experimental validation. (g) List of differentially abundant proteins between the control and Ndufs4-cKO groups, and their P values shown in Figure 2. Only proteins that passed the signifcant cut-off (abs[log2FC]>1 and Padj <0.001) are listed. Proteins overlapping chr13 locus are shown in blue font. (h) List of 157 mt-eQTL (LOD >6) across five tissues in the DO mice as shown in Figure 4A. (i) SNP association profile for mt-Nd5 in heart as shown in Figure 4C. (j) Protein-protein correlations between the three candidates and known hypertrophic markers. The bicor P values between the respective markers and each locus candidate gene are listed. [file elife-82619-supp1.xlsx]

## Sheet: Supplementary File 1a
Supplementary File 1a. List of HMDP strains used for proteomic analyses and
their respective genotypes at the three loci.
S.No.	Strain	Sex	chr13 (rs48592660)	chr17 (rs46340181)	chr7 (rs32451909)
1	A/J	F	GG	TT	AA
2	BALB/cByJ	F	GG	TT	AA
3	BTBR T<+> tf/J	F	GG	TT	AA
4	BUB/BnJ	F	AA	TT	AA
5	C3H/HeJ	F	GG	TT	GG
6	C57BL/6J	F	GG	TT	AA
7	C58/J	F	GG	TT	AA
8	CBA/J	F	GG	TT	GG
9	CE/J	F	GG	TT	GG
10	DBA/2J	F	AA	GG	GG
11	FVB/NJ	F	GG	GG	AA
12	LG/J	F	GG	TT	AA
13	LP/J	F	GG	TT	GG
14	MRL/MpJ	F	GG	TT	AA
15	NON/ShiLtJ	F	GG	GG	AA
16	NOR/LtJ	F	AA	GG	GG
17	NZB/BlNJ	F	GG	TT	AA
18	PL/J	F	GG	GG	AA
19	SJL/J	F	GG	GG	AA
20	AXB4/PgnJ	F	GG	TT	AA
21	AXB8/PgnJ	F	GG	TT	AA
22	AXB10/PgnJ	F	GG	TT	AA
23	AXB13/PgnJ	F	GG	TT	AA
24	AXB15/PgnJ	F	GG	TT	AA
25	AXB19a/PgnJ	F	GG	TT	AA
26	BXA2/PgnJ	F	GG	TT	AA
27	BXA4/PgnJ	F	GG	TT	AA
28	BXA12/PgnJ	F	GG	TT	AA
29	BXA13/PgnJ	F	GG	TT	AA
30	BXA14/PgnJ	F	GG	TT	AA
31	BXA16/PgnJ	F	GG	TT	AA
32	BXD5/TyJ	F	GG	TT	GG
33	BXD12/TyJ	F	AA	TT	AA
34	BXD14/TyJ	F	AA	GG	GG
35	BXD19/TyJ	F	GG	TT	AA
36	BXD21/TyJ	F	AA	GG	AA
37	BXD22/TyJ	F	GG	TT	GG
38	BXD27/TyJ	F	GA	GG	AA
39	BXD28/TyJ	F	AA	GG	AA
40	BXD29/Ty	F	GG	TT	GG
41	BXD31/TyJ	F	AA	TT	AA
42	BXD32/TyJ	F	AA	GG	GG
43	BXD33/TyJ	F	AA	GG	AA
44	BXD34/TyJ	F	GG	TT	AA
45	BXD39/TyJ	F	AA	TT	GG
46	BXD40/TyJ	F	GG	GG	AA
47	BXD44/RwwJ	F	AA	GG	AA
48	BXD45/RwwJ	F	AA	TT	GG
49	BXD48/RwwJ	F	GG	TT	GG
50	BXD48a/RwwJ	F	GG	TT	AA
51	BXD50/RwwJ	F	AA	TT	GG
52	BXD51/RwwJ	F	GG	TT	AG
53	BXD55/RwwJ	F	AA	TT	GG
54	BXD60/RwwJ	F	GA	TT	GG
55	BXD61/RwwJ	F	GG	TT	AA
56	BXD62/RwwJ	F	GG	TT	GG
57	BXD63/RwwJ	F	AA	TT	AA
58	BXD65/RwwJ	F	GG	GG	AA
59	BXD66/RwwJ	F	GA	TT	AA
60	BXD67/RwwJ	F	AA	TT	GG
61	BXD68/RwwJ	F	AA	TT	AA
62	BXD69/RwwJ	F	AA	GG	AA
63	BXD73/RwwJ	F	AA	GG	AA
64	BXD75/RwwJ	F	GG	GG	AA
65	BXD86/RwwJ	F	AA	GG	GG
66	BXD87/RwwJ	F	GA	GG	AG
67	BXD100/RwwJ	F	GG	GG	AA
68	BXH8/TyJ	F	GG	TT	GG
69	BXH10/TyJ	F	GG	TT	GG
70	BXH14/TyJ	F	GG	TT	GG
71	CXB2/ByJ	F	GG	TT	AA
72	CXB12/HiAJ	F	GG	TT	AA

## Sheet: Supplementary File 1b
Supplementary File 1b. Five modules of WGCNA and their corresponding proteins.
S.No.	Brown (chr13)	Green (chr17)	Turquoise (chr7)	Blue	Yellow
1	Aldh4a1	Casp3	2310061I04Rik	Abat	Acaca
2	Aurkaip1	Chchd1	Abcb10	Adhfe1	Acad10
3	Chchd5	Cox11	Abcb7	Agk	Acly
4	Coq10b	Cpox	Abcb8	Agpat5	Acot11
5	Cox6c	Dap3	Abcd1	Aldh3a2	Acss3
6	Cps1	Diablo	Abcd3	Alkbh7	Ahcyl1
7	Dars2	Ecsit	Abhd11	Bloc1s1	Aifm2
8	Dmac1	Mrps10	Acaa2	Cox10	Aldh1a7
9	Dnajc30	Mrps11	Acad11	Fdps	Aldh1l1
10	Fabp1	Mrps12	Acad12	Fundc1	Aldh9a1
11	Fdx1	Mrps15	Acad8	Gadd45gip1	Arf5
12	Foxred1	Mrps16	Acadm	Golph3	Bcl2l13
13	Guk1	Mrps17	Acads	Lig3	Bid
14	Kars	Mrps18b	Acadsb	Lrpprc	Cat
15	Micu3	Mrps18c	Acadvl	Maoa	Cbr2
16	Mrpl35	Mrps2	Acat1	Mavs	Cbr3
17	Mrpl48	Mrps21	Aco2	Metap1d	Coasy
18	Mterf2	Mrps22	Acot13	Mrpl1	Cox6a1
19	Ndufa1	Mrps23	Acot2	Mrpl10	Dbi
20	Ndufa10	Mrps24	Acp6	Mrpl11	Dnm1l
21	Ndufa11	Mrps25	Acsf3	Mrpl12	Echdc1
22	Ndufa12	Mrps26	Acsl1	Mrpl13	Fam162a
23	Ndufa13	Mrps27	Acsl6	Mrpl14	Fam210b
24	Ndufa2	Mrps28	Acsm3	Mrpl15	Fasn
25	Ndufa3	Mrps31	Acss1	Mrpl16	Gars
26	Ndufa5	Mrps33	Adck1	Mrpl17	Gpd2
27	Ndufa6	Mrps34	Afg1l	Mrpl18	Gpx1
28	Ndufa7	Mrps35	Afg3l1	Mrpl19	Idi1
29	Ndufa8	Mrps5	Afg3l2	Mrpl2	Ldhb
30	Ndufa9	Mrps6	Aifm1	Mrpl20	Letmd1
31	Ndufab1	Mrps7	Ak2	Mrpl21	Lyplal1
32	Ndufaf2	Mrps9	Ak3	Mrpl22	Mgst1
33	Ndufb10	Mtif2	Ak4	Mrpl23	Miga2
34	Ndufb11	Ptcd3	Akr1b10	Mrpl24	Mpv17
35	Ndufb3	Rbfa	Aldh1b1	Mrpl27	Mrps14
36	Ndufb4	Spryd4	Aldh5a1	Mrpl28	Myg1
37	Ndufb5	Tha1	Aldh6a1	Mrpl3	Paics
38	Ndufb6	Tmem126b	Aldh7a1	Mrpl30	Pcx
39	Ndufb7		Amacr	Mrpl32	Prdx2
40	Ndufb8		Apoo	Mrpl33	Pycr2
41	Ndufb9		Apool	Mrpl34	Rdh14
42	Ndufc2		Atad1	Mrpl37	Rpia
43	Ndufs1		Atp5c1	Mrpl38	Sfxn1
44	Ndufs2		Atp5md	Mrpl39	Sfxn5
45	Ndufs3		Atp5pb	Mrpl4	Slc25a1
46	Ndufs4		Atpaf1	Mrpl40	Slc25a10
47	Ndufs5		Atpaf2	Mrpl41	Slc25a35
48	Ndufs6		Auh	Mrpl42	Stom
49	Ndufs7		Bckdha	Mrpl43	Them4
50	Ndufs8		Bckdhb	Mrpl44	Timm44
51	Ndufv1		Bckdk	Mrpl45	Tmem11
52	Ndufv2		Bcs1l	Mrpl46	Tomm20
53	Ndufv3		Bdh1	Mrpl47	Tst
54	Oxr1		Bnip3	Mrpl49	Ucp1
55	Pars2		Bola3	Mrpl50
56	Pde12		Bphl	Mrpl51
57	Ptcd1		C1qbp	Mrpl52
58	Sdhaf2		Cars2	Mrpl53
59	Slc25a40		Cbr4	Mrpl54
60	Suclg2		Ccdc127	Mrpl55
61	Tefm		Ccdc58	Mrpl57
62	Thnsl1		Ccdc90b	Mrpl58
63	Timm17b		Chchd3	Mrpl9
64	Timmdc1		Chchd4	Mrps18a
65	Tmem14c		Chchd7	Mrps30
66	Tmem70		Chpt1	mt-Co3
67	Tsfm		Cisd1	Mtg1
68			Ckmt2	Mtif3
69			Clpb	Ndufaf1
70			Clpp	Ndufaf8
71			Clybl	Nnt
72			Cmc2	Oxa1l
73			Coa6	Pitrm1
74			Coa7	Poldip2
75			Comt	Ptges2
76			Coq10a	Rhot2
77			Coq3	Rida
78			Coq4	Rmdn1
79			Coq5	Rmdn3
80			Coq6	Sdhd
81			Coq7	Slirp
82			Coq8a	Sptlc2
83			Coq9	Taco1
84			Cox15	Tbrg4
85			Cox17	Tdrkh
86			Cox19	Timm50
87			Cox20	Tmem186
88			Cox4i1	Trmt10c
89			Cox5a
90			Cox6a2
91			Cox6b1
92			Cox7a1
93			Cpt1b
94			Cpt2
95			Crat
96			Cryzl2
97			Csl
98			Cyc1
99			Cycs
100			Dbt
101			Dcakd
102			Decr1
103			Dglucy
104			Dhrs1
105			Dhrs4
106			Dlat
107			Dld
108			Dlst
109			Dmpk
110			Dnaja3
111			Dnajc11
112			Dnajc19
113			Dnlz
114			Ears2
115			Ech1
116			Echdc3
117			Echs1
118			Eci1
119			Eci2
120			Ephx2
121			Eri3
122			Etfa
123			Etfb
124			Etfdh
125			Ethe1
126			Fahd2a
127			Fam136a
128			Fam210a
129			Fars2
130			Fastkd2
131			Fdx2
132			Fdxr
133			Fech
134			Fis1
135			Fkbp10
136			Flad1
137			Fmc1
138			Fth1
139			Fundc2
140			Fxn
141			Gatb
142			Gatd3a
143			Gcat
144			Gcdh
145			Gfm1
146			Gfm2
147			Glod4
148			Glrx2
149			Glrx5
150			Got2
151			Gpam
152			Gpx4
153			Grhpr
154			Grpel1
155			Grsf1
156			Gstk1
157			Gtpbp3
158			Guf1
159			Hadh
160			Hadha
161			Hadhb
162			Hars2
163			Hccs
164			Hdhd5
165			Hibch
166			Hint2
167			Hint3
168			Hmgcl
169			Hscb
170			Hsd17b10
171			Hsd17b4
172			Hsdl1
173			Hsdl2
174			Hspa9
175			Hspd1
176			Hspe1
177			Htatip2
178			Htra2
179			Iars2
180			Iba57
181			Idh2
182			Idh3a
183			Idh3b
184			Idh3g
185			Immt
186			Isca2
187			Isoc2a
188			Ivd
189			Kyat3
190			L2hgdh
191			Lars2
192			Ldhd
193			Letm1
194			Lias
195			Lipt1
196			Lonp1
197			Lypla1
198			Lyrm1
199			Lyrm4
200			Lyrm9
201			Macrod1
202			Maip1
203			Maob
204			Mars2
205			Mcat
206			Mccc2
207			Mcee
208			Mcur1
209			Mdh2
210			Me2
211			Me3
212			Mfn1
213			Mfn2
214			Mgst3
215			Mipep
216			Mlycd
217			Mmaa
218			Mmab
219			Mocs1
220			Mpc1
221			Mpc2
222			Mrm2
223			Mrps36
224			Mrrf
225			Msra
226			Mtch1
227			Mtch2
228			Mtfp1
229			Mtfr1l
230			Mto1
231			Mtx1
232			Mtx2
233			Mul1
234			Nadk2
235			Nars2
236			Naxd
237			Naxe
238			Ndufa4
239			Ndufaf3
240			Ndufaf4
241			Ndufaf5
242			Nfs1
243			Nfu1
244			Nipsnap2
245			Nit2
246			Nlrx1
247			Nrd1
248			Nsun2
249			Nt5dc3
250			Nubpl
251			Nudt13
252			Nudt2
253			Nudt5
254			Nudt8
255			Oat
256			Ociad1
257			Ogdh
258			Opa1
259			Opa3
260			Oxct1
261			Oxld1
262			Oxnad1
263			Oxsm
264			Park7
265			Parl
266			Pcbd2
267			Pcca
268			Pccb
269			Pck2
270			Pdf
271			Pdha1
272			Pdhb
273			Pdhx
274			Pdk1
275			Pdk2
276			Pdp1
277			Pdpr
278			Pet100
279			Pex11b
280			Pgs1
281			Phb
282			Phb2
283			Plgrkt
284			Plpbp
285			Pmpca
286			Pmpcb
287			Pnpla8
288			Pnpo
289			Pnpt1
290			Polq
291			Ppa2
292			Ppif
293			Ppm1k
294			Pptc7
295			Prdx3
296			Prdx4
297			Prdx5
298			Prkaca
299			Ptcd2
300			Pxmp2
301			Pyurf
302			Qdpr
303			Qrsl1
304			Qtrt1
305			Rars2
306			Rdh13
307			Rexo2
308			Rfk
309			Rhot1
310			Rmnd1
311			Romo1
312			Rtn4ip1
313			Samm50
314			Sars2
315			Sco1
316			Sco2
317			Sdha
318			Sdhaf1
319			Sdhb
320			Sdhc
321			Sdr39u1
322			Selenoo
323			Serac1
324			Sfxn3
325			Sirt5
326			Slc25a11
327			Slc25a12
328			Slc25a13
329			Slc25a15
330			Slc25a19
331			Slc25a20
332			Slc25a22
333			Slc25a24
334			Slc25a3
335			Slc25a31
336			Slc25a34
337			Slc25a4
338			Slc25a42
339			Slc25a46
340			Slc25a5
341			Slc30a9
342			Smim20
343			Smim8
344			Snd1
345			Sod2
346			Spg7
347			Spr
348			Sqor
349			Ssbp1
350			Sucla2
351			Suclg1
352			Suox
353			Supv3l1
354			Surf1
355			Synj2bp
356			Tamm41
357			Tars2
358			Tcaim
359			Tfam
360			Tfb2m
361			Timm10
362			Timm10b
363			Timm17a
364			Timm21
365			Timm22
366			Timm29
367			Timm8a1
368			Timm8b
369			Tmem126a
370			Tmem143
371			Tmem177
372			Tmem205
373			Tmem65
374			Tmlhe
375			Tomm40l
376			Trap1
377			Trmu
378			Ttc19
379			Tufm
380			Twnk
381			Txn2
382			Txnrd1
383			Txnrd2
384			Ucp3
385			Uqcc1
386			Uqcc2
387			Uqcrb
388			Uqcrc1
389			Uqcrc2
390			Uqcrfs1
391			Uqcrh
392			Uqcrq
393			Vars2
394			Vdac1
395			Vdac2
396			Vdac3
397			Vps13d
398			Vwa8
399			Yars2
400			Yme1l1
401			Yrdc
402			Zadh2

## Sheet: Supplementary File 1c
Supplementary File 1c. List of proteins associated with chr13 locus listed in Figure 2A.
The associated P values between the respective proteins and chr13 locus
eigengene pSNP are listed.
S.No.	gene_symbol	gene_chr	chr13 pSNP	snp_chr	snp_bp_mm10	pvalue
1	Ndufa2	18	rs48592660	13	64776224	6.40958e-05
2	Ndufa3	7	rs48592660	13	64776224	1.07492e-06
3	Ndufa5	6	rs48592660	13	64776224	5.37605e-08
4	Ndufa6	15	rs48592660	13	64776224	2.46195e-08
5	Ndufa7	17	rs48592660	13	64776224	1.05586e-06
6	Ndufa10	1	rs48592660	13	64776224	7.64421e-08
7	Ndufa12	10	rs48592660	13	64776224	5.0819e-08
8	Ndufa13	8	rs48592660	13	64776224	3.11456e-08
9	Ndufb4	16	rs48592660	13	64776224	2.28384e-07
10	Ndufb5	3	rs48592660	13	64776224	7.15403e-08
11	Ndufb6	4	rs48592660	13	64776224	6.1643e-07
12	Ndufb7	8	rs48592660	13	64776224	3.03156e-08
13	Ndufb8	19	rs48592660	13	64776224	9.52127e-07
14	Ndufb9	15	rs48592660	13	64776224	7.17276e-08
15	Ndufb10	17	rs48592660	13	64776224	5.91492e-08
16	Ndufc2	7	rs48592660	13	64776224	9.58932e-08
17	Ndufs2	1	rs48592660	13	64776224	6.37936e-07
18	Ndufs4	13	rs48592660	13	64776224	1.34015e-06
19	Ndufs5	4	rs48592660	13	64776224	4.51484e-07
20	Ndufs7	10	rs48592660	13	64776224	2.4178e-07
21	Ndufs8	19	rs48592660	13	64776224	5.89603e-08
22	Ndufv1	19	rs48592660	13	64776224	9.33355e-08
23	Ndufv2	17	rs48592660	13	64776224	1.45813e-08
24	Ndufv3	17	rs48592660	13	64776224	2.87159e-08
25	Osbpl1a	18	rs48592660	13	64776224	0.255743
26	Timmdc1	16	rs48592660	13	64776224	5.30005e-07

## Sheet: Supplementary File 1d
Supplementary File 1d. List of proteins associated with chr17 locus listed in Figure 3A.
The associated P values between the respective proteins and chr17 locus
eigengene pSNP are listed.
S.No.	gene_symbol	gene_chr	chr17 pSNP	snp_chr	snp_bp_mm10	pvalue
1	Cox7a2l	17	rs46340181	17	84780459	1.68577e-14
2	Lrpprc	17	rs46340181	17	84780459	2.54316e-17
3	Mrps2	2	rs46340181	17	84780459	1.77348e-08
4	Mrps5	2	rs46340181	17	84780459	2.43759e-09
5	Mrps6	16	rs46340181	17	84780459	5.94258e-07
6	Mrps10	17	rs46340181	17	84780459	6.24006e-09
7	Mrps11	7	rs46340181	17	84780459	4.51485e-09
8	Mrps15	4	rs46340181	17	84780459	6.35752e-12
9	Mrps18b	17	rs46340181	17	84780459	4.77039e-07
10	Mrps22	9	rs46340181	17	84780459	7.7159e-09
11	Mrps26	2	rs46340181	17	84780459	2.66587e-07
12	Mrps27	13	rs46340181	17	84780459	6.25361e-07
13	Mrps28	3	rs46340181	17	84780459	2.76943e-07
14	Mrps31	8	rs46340181	17	84780459	2.65323e-07
15	Mrps33	6	rs46340181	17	84780459	2.61785e-08
16	Mrps34	17	rs46340181	17	84780459	6.96609e-07
17	Mrps35	6	rs46340181	17	84780459	1.15141e-06
18	Msrb2	2	rs46340181	17	84780459	0.0427798
19	Ndufa1	X	rs46340181	17	84780459	5.89837e-07
20	Ndufaf7	17	rs46340181	17	84780459	1.05477e-06
21	Ptcd3	6	rs46340181	17	84780459	6.33938e-09
22	Slirp	12	rs46340181	17	84780459	9.57199e-13

## Sheet: Supplementary File 1e
Supplementary File 1e. List of proteins associated with chr7 locus listed in Figure 4A.
The associated P values between the respective proteins and chr7 locus
eigengene pSNP are listed.
S.No.	gene_symbol	gene_chr	chr7 pSNP	snp_chr	snp_bp_mm10	pvalue
1	Acad12	5	rs32451909	7	118107697	1.21824e-07
2	Acly	11	rs32451909	7	118107697	5.14813e-07
3	Acp6	3	rs32451909	7	118107697	2.22902e-06
4	Atpaf1	4	rs32451909	7	118107697	2.59221e-07
5	Auh	13	rs32451909	7	118107697	2.75259e-06
6	C1qbp	11	rs32451909	7	118107697	1.261e-06
7	Coq3	4	rs32451909	7	118107697	1.32007e-08
8	Coq6	12	rs32451909	7	118107697	7.18638e-07
9	Coq7	7	rs32451909	7	118107697	1.79022e-18
10	Dnaja3	16	rs32451909	7	118107697	2.06919e-07
11	Fam162a	16	rs32451909	7	118107697	3.29122e-06
12	Fasn	11	rs32451909	7	118107697	7.16792e-07
13	Fundc2	X	rs32451909	7	118107697	1.99648e-06
14	Fxn	19	rs32451909	7	118107697	1.20378e-06
15	Hsdl1	8	rs32451909	7	118107697	5.36931e-07
16	Ldhb	6	rs32451909	7	118107697	5.66695e-07
17	Lonp1	17	rs32451909	7	118107697	3.18273e-06
18	Mtx1	3	rs32451909	7	118107697	2.51061e-07
19	Ndufb11	X	rs32451909	7	118107697	1.88851e-05
20	Rtn4ip1	10	rs32451909	7	118107697	1.33289e-08
21	Slc25a3	10	rs32451909	7	118107697	1.96412e-06
22	Slc25a11	11	rs32451909	7	118107697	3.49288e-07
23	Slc25a12	2	rs32451909	7	118107697	1.9958e-07
24	Slc25a13	6	rs32451909	7	118107697	7.98351e-07
25	Tmem126a	7	rs32451909	7	118107697	5.60461e-06
26	Tmem143	7	rs32451909	7	118107697	1.17887e-06

## Sheet: Supplementary File 1f
Supplementary File 1f. Scoring of miRNA targeting Ndufs4 by nine algorithms and one dataset of experimental
validation.
S.No.	miRNA	Gene	DIANA	miRanda	miRBridge	PicTar	PITA	rna22	TargetScan	miRDB	miRMap	SUM	ENCORI
1	mmu-miR-23b-3p	Ndufs4	1	1	0	0	1	0	0	0	1	4/9	Y
2	hsa-miR-23b-3p	NDUFS4	0	0	0	0	0	0	0	0	0	0/9	ND
3	mmu-miR-27b-3p	Ndufs4	1	1	1	1	1	0	1	1	1	8/9	Y
4	hsa-miR-27b-3p	NDUFS4	1	1	1	1	1	0	1	1	1	8/9	Y
5	mmu-miR-24-3p	Ndufs4	0	0	0	0	0	0	0	0	0	0/9	ND
6	hsa-miR-24-3p	NDUFS4	0	0	0	0	0	0	0	0	0	0/9	ND
Y, experimental validation present; ND, not determined.

## Sheet: Supplementary File 1g
Supplementary File 1g. List of differentially abundant proteins between the control and
Ndufs4-cKO groups, and their P values shown in Figure 2.
Only proteins that passed the signifcant cut-off (abs[log2FC] > 1 and Padj
< 0.001) are listed. Proteins overlapping chr13 locus are shown in blue font.
S.No.	Symbol	Log2 (Ctrl/cKO)	Padj
1	ND1	1.25787	2.19e-07
2	ND2	1.44484	4.46e-06
3	ND4	1.28018	8.01e-08
4	NDUFA2	1.07794	7.99e-10
5	NDUFA3	1.14922	0.000148239
6	NDUFA5	1.20037	1e-10
7	NDUFA6	1.18785	2.04e-09
8	NDUFA7	1.14975	2.02e-08
9	NDUFA9	1.33863	7.32e-11
10	NDUFA10	1.18862	3.76e-10
11	NDUFA12	1.99322	1.11e-11
12	NDUFAF2	-1.39293	3.43e-11
13	NDUFB3	1.20867	4.13e-12
14	NDUFB4	1.00889	1.2e-06
15	NDUFB5	1.04411	1.26e-11
16	NDUFB6	1.22899	2.39e-08
17	NDUFB7	1.05929	3.99e-05
18	NDUFB8	1.19631	2.29e-09
19	NDUFB10	1.07015	2.45e-11
20	NDUFB11	1.1262	2.89e-14
21	NDUFC2	1.08167	9.42e-12
22	NDUFS1	1.20879	1.11e-11
23	NDUFS2	1.23482	7.32e-11
24	NDUFS3	1.15786	2.3e-09
25	NDUFS4	2.35651	3.19e-10
26	NDUFS5	1.18866	4.24e-12
27	NDUFS6	1.12332	2.4e-11
28	NDUFS7	1.27181	1.23e-10
29	NDUFS8	1.12021	1.23e-09
30	NDUFV1	1.29621	9.02e-12
31	NDUFV2	1.1728	1.24e-07

## Sheet: Supplementary File 1h
Supplementary File 1h. List of 157 mt-eQTL (LOD > 6) across five tissues in the DO mice as shown in Figure 4A.
S.No.	tissue	gene_id	symbol	gene_chrom	gene_mid	marker_id	marker_chrom	marker_position	lod	A	B	C	D	E	F	G	H
1	adipose	ENSMUSG00000064358	mt-Co3	MT	8998	1_191470257	1	191470257	6.9	0.1	0.04	-0.32	-0.26	0.15	-0.42	0.56	0.17
2	adipose	ENSMUSG00000064368	mt-Nd6	MT	13811	2_133398934	2	133398934	6.8	-0.04	-0.15	0.15	-0.03	-0.48	0.16	0.46	-0.08
3	adipose	ENSMUSG00000064351	mt-Co1	MT	6100	2_134340893	2	134340893	7.3	-0.05	-0.1	0.09	-0.09	-0.43	0.22	0.49	-0.14
4	adipose	ENSMUSG00000064367	mt-Nd5	MT	12654	2_134340893	2	134340893	6.8	-0.07	-0.09	0.17	-0.07	-0.49	0.2	0.49	-0.15
5	adipose	ENSMUSG00000064370	mt-Cytb	MT	14716	2_134345583	2	134345583	6.9	-0.12	-0.14	0.15	-0.06	-0.35	0.21	0.43	-0.12
6	adipose	ENSMUSG00000064341	mt-Nd1	MT	3229	2_134350017	2	134350017	6.6	-0.02	0.05	0.1	-0.09	-0.5	0.19	0.46	-0.18
7	adipose	ENSMUSG00000064363	mt-Nd4	MT	10856	2_134350017	2	134350017	7	-0.07	-0.07	0.1	-0.07	-0.46	0.26	0.45	-0.14
8	adipose	ENSMUSG00000064368	mt-Nd6	MT	13811	2_134456643	2	134456643	7	-0.05	-0.08	0.15	-0.02	-0.5	0.2	0.46	-0.17
9	adipose	ENSMUSG00000064358	mt-Co3	MT	8998	2_180023957	2	180023957	6	-0.64	-0.16	-0.27	0.31	-0.18	0.57	0.18	0.2
10	adipose	ENSMUSG00000064345	mt-Nd2	MT	4432	2_181749663	2	181749663	6.1	-0.94	-0.05	-0.16	0.05	-0.12	0.54	0.33	0.36
11	adipose	ENSMUSG00000064368	mt-Nd6	MT	13811	4_34196094	4	34196094	6.2	-0.09	0.31	-0.1	0.08	-0.3	0.09	-0.33	0.33
12	adipose	ENSMUSG00000064357	mt-Atp6	MT	8267	4_34444151	4	34444151	6.3	-0.07	0.37	0.01	-0.01	-0.27	0.11	-0.41	0.28
13	adipose	ENSMUSG00000064339	mt-Rnr2	MT	1884	4_87993275	4	87993275	6	-0.13	-0.09	-0.01	-0.42	0.1	0.08	0.22	0.25
14	adipose	ENSMUSG00000064354	mt-Co2	MT	7354	4_106195395	4	106195395	7.8	0.04	-0.02	-0.39	-0.1	-0.07	0.07	0.69	-0.21
15	adipose	ENSMUSG00000064354	mt-Co2	MT	7354	8_13659864	8	13659864	6.2	0.02	-0.32	0.17	0.24	0.06	0.03	0.07	-0.27
16	adipose	ENSMUSG00000064354	mt-Co2	MT	7354	10_123214164	10	123214164	6.5	-0.05	-0.46	-0.13	0.04	0.49	-0.15	-0.02	0.28
17	adipose	ENSMUSG00000064368	mt-Nd6	MT	13811	13_27106337	13	27106337	6.1	-0.09	0.27	0.23	-0.08	-0.08	-0.46	-0.02	0.23
18	adipose	ENSMUSG00000065947	mt-Nd4l	MT	10025	14_77546413	14	77546413	6.4	0.12	-0.12	0.24	0.32	-0.43	-0.14	0.15	-0.14
19	adipose	ENSMUSG00000064354	mt-Co2	MT	7354	14_119984235	14	119984235	6.2	0.42	-0.15	-0.1	0.04	-0.32	0.05	0.06	0
20	adipose	ENSMUSG00000064363	mt-Nd4	MT	10856	16_3000000	16	3000000	7.9	-0.2	-0.45	0.4	0.28	-0.25	0.43	0.09	-0.31
21	adipose	ENSMUSG00000064367	mt-Nd5	MT	12654	16_3000000	16	3000000	6.8	-0.2	-0.41	0.34	0.21	-0.17	0.45	0.05	-0.28
22	adipose	ENSMUSG00000064368	mt-Nd6	MT	13811	16_3000000	16	3000000	6.5	-0.13	-0.36	0.29	0.17	-0.17	0.5	0	-0.3
23	adipose	ENSMUSG00000064370	mt-Cytb	MT	14716	16_3000000	16	3000000	7.1	-0.13	-0.39	0.32	0.23	-0.26	0.46	0.09	-0.32
24	adipose	ENSMUSG00000064339	mt-Rnr2	MT	1884	16_3568663	16	3568663	6.4	-0.24	-0.34	0.42	0.17	-0.07	0.27	0.07	-0.28
25	adipose	ENSMUSG00000064345	mt-Nd2	MT	4432	16_4026626	16	4026626	6.3	-0.14	-0.36	0.39	0.15	-0.15	0.28	0.05	-0.21
26	adipose	ENSMUSG00000064356	mt-Atp8	MT	7868	16_5179161	16	5179161	7.3	-0.04	-0.46	0.36	0.26	-0.16	0.27	0.03	-0.25
27	adipose	ENSMUSG00000064351	mt-Co1	MT	6100	16_6408844	16	6408844	6.9	0.21	-0.38	0.26	0.12	-0.14	0.4	-0.02	-0.45
28	adipose	ENSMUSG00000064360	mt-Nd3	MT	9632	19_25377890	19	25377890	6.5	-0.11	0.01	-0.02	0.05	0.01	-0.11	0.08	0.08
29	adipose	ENSMUSG00000064351	mt-Co1	MT	6100	19_25748084	19	25748084	6.5	-0.2	0.03	-0.08	0.06	-0.16	-0.12	0.32	0.15
30	adipose	ENSMUSG00000064363	mt-Nd4	MT	10856	19_25748084	19	25748084	6.5	-0.2	0.06	-0.12	0.06	-0.17	-0.13	0.31	0.19
31	adipose	ENSMUSG00000065947	mt-Nd4l	MT	10025	19_26899453	19	26899453	7.8	-0.32	0.07	-0.11	0.07	-0.05	-0.27	0.43	0.17
32	heart	ENSMUSG00000064351	mt-Co1	MT	6100	2_76278312	2	76278312	7.1	0.01	0.31	0.14	0.05	0.1	-0.39	0.03	-0.26
33	heart	ENSMUSG00000064367	mt-Nd5	MT	12654	2_179813971	2	179813971	7.1	0.33	-0.08	0.25	0.05	-0.45	0.1	-0.28	0.08
34	heart	ENSMUSG00000064368	mt-Nd6	MT	13811	2_179813971	2	179813971	6.2	0.24	-0.1	0.23	0	-0.43	0.12	-0.23	0.18
35	heart	ENSMUSG00000064360	mt-Nd3	MT	9632	2_181329283	2	181329283	6.7	0.47	-0.15	0.15	-0.01	-0.13	0.33	-0.41	-0.24
36	heart	ENSMUSG00000064363	mt-Nd4	MT	10856	2_181340625	2	181340625	7.1	0.33	-0.03	0.18	-0.13	-0.38	0.4	-0.34	-0.04
37	heart	ENSMUSG00000064358	mt-Co3	MT	8998	8_80834715	8	80834715	6.4	0.03	0.26	0.15	0.23	-0.41	0.05	0.07	-0.37
38	heart	ENSMUSG00000064357	mt-Atp6	MT	8267	8_84719037	8	84719037	6.4	-0.36	0.49	0.04	0.28	-0.21	-0.02	0.11	-0.34
39	heart	ENSMUSG00000064351	mt-Co1	MT	6100	8_112072265	8	112072265	6.5	-0.06	0.37	-0.07	0.25	0	0.21	-0.32	-0.38
40	heart	ENSMUSG00000064345	mt-Nd2	MT	4432	9_65546077	9	65546077	6.8	-0.15	0.51	0.45	-0.21	-0.14	-0.15	-0.24	-0.07
41	heart	ENSMUSG00000064351	mt-Co1	MT	6100	9_65546077	9	65546077	13.9	0.02	0.78	0.64	-0.32	-0.4	-0.18	-0.34	-0.21
42	heart	ENSMUSG00000064370	mt-Cytb	MT	14716	9_65546077	9	65546077	7.4	0.07	0.54	0.41	-0.25	-0.3	-0.09	-0.23	-0.14
43	heart	ENSMUSG00000064341	mt-Nd1	MT	3229	9_65878509	9	65878509	12	-0.05	0.8	0.49	-0.42	-0.1	-0.24	-0.29	-0.19
44	heart	ENSMUSG00000064363	mt-Nd4	MT	10856	9_65878509	9	65878509	7.7	0	0.53	0.4	-0.21	-0.09	-0.25	-0.26	-0.12
45	heart	ENSMUSG00000065947	mt-Nd4l	MT	10025	10_10827474	10	10827474	6.4	0.08	0.09	0.53	0.1	-0.55	0.02	-0.01	-0.25
46	heart	ENSMUSG00000064357	mt-Atp6	MT	8267	10_62037414	10	62037414	6.4	0.08	0.59	0.06	-0.58	0.15	-0.18	-0.22	0.1
47	heart	ENSMUSG00000064345	mt-Nd2	MT	4432	10_62177948	10	62177948	6.4	-0.09	0.57	-0.2	-0.36	-0.04	-0.08	-0.17	0.37
48	heart	ENSMUSG00000064351	mt-Co1	MT	6100	10_62303835	10	62303835	8.6	-0.12	0.45	0.01	-0.39	0.11	0.12	-0.5	0.31
49	heart	ENSMUSG00000064363	mt-Nd4	MT	10856	10_62303835	10	62303835	6.6	-0.19	0.53	0.05	-0.39	-0.03	-0.07	-0.23	0.33
50	heart	ENSMUSG00000064370	mt-Cytb	MT	14716	10_85610441	10	85610441	6.2	0.09	0.4	-0.07	0.24	0.06	-0.39	-0.24	-0.08
51	heart	ENSMUSG00000064351	mt-Co1	MT	6100	11_6462540	11	6462540	7.7	-0.29	-0.02	0.33	-0.23	0.26	0.27	0.13	-0.45
52	heart	ENSMUSG00000064339	mt-Rnr2	MT	1884	11_6658320	11	6658320	6.9	0.07	-0.2	0.15	0.41	-0.45	-0.09	0.02	0.09
53	heart	ENSMUSG00000065947	mt-Nd4l	MT	10025	11_35675328	11	35675328	6.6	0.09	-0.07	0.16	-0.11	-0.15	0.04	0.58	-0.53
54	heart	ENSMUSG00000064354	mt-Co2	MT	7354	11_66847468	11	66847468	8.2	-0.05	0.54	0	0.16	0.25	-0.47	-0.48	0.05
55	heart	ENSMUSG00000064370	mt-Cytb	MT	14716	12_66651285	12	66651285	6.2	0.37	-0.38	0.07	-0.01	0.26	0.08	-0.41	0.02
56	heart	ENSMUSG00000064357	mt-Atp6	MT	8267	12_92993046	12	92993045	6.1	-0.01	0.35	0.33	0.09	-0.21	-0.45	0.05	-0.15
57	heart	ENSMUSG00000064358	mt-Co3	MT	8998	12_97456802	12	97456802	7	0.22	0.27	0.39	0.11	-0.25	-0.5	-0.24	0.01
58	heart	ENSMUSG00000064358	mt-Co3	MT	8998	13_54845446	13	54845446	6.2	0.04	0.18	0.18	-0.55	-0.02	0.24	-0.13	0.05
59	heart	ENSMUSG00000064354	mt-Co2	MT	7354	13_117068332	13	117068332	6.3	0.14	0.11	-0.14	0.04	-0.25	0.49	-0.36	-0.03
60	heart	ENSMUSG00000064356	mt-Atp8	MT	7868	17_83598460	17	83598460	7.6	0.12	0.24	0.23	-0.39	-0.35	-0.24	-0.16	0.54
61	heart	ENSMUSG00000064354	mt-Co2	MT	7354	17_83733184	17	83733184	6.1	-0.03	0.24	0.21	-0.44	-0.11	-0.11	-0.13	0.36
62	heart	ENSMUSG00000064341	mt-Nd1	MT	3229	17_84289175	17	84289175	33.7	0.53	0.54	0.6	-0.87	-0.64	-0.4	-0.64	0.89
63	heart	ENSMUSG00000064345	mt-Nd2	MT	4432	17_84440728	17	84440728	18.3	0.3	0.33	0.39	-0.67	-0.6	-0.08	-0.49	0.82
64	heart	ENSMUSG00000064339	mt-Rnr2	MT	1884	17_84834878	17	84834878	31.8	0.63	0.64	0.5	-1.02	-0.73	-0.3	-0.23	0.51
65	heart	ENSMUSG00000064357	mt-Atp6	MT	8267	17_84865832	17	84865832	16.9	0.28	0.4	0.41	-0.64	-0.6	-0.35	-0.2	0.7
66	heart	ENSMUSG00000064358	mt-Co3	MT	8998	17_84865832	17	84865832	9.4	0.16	0.21	0.31	-0.52	-0.22	-0.26	-0.2	0.53
67	heart	ENSMUSG00000064363	mt-Nd4	MT	10856	17_84865832	17	84865832	20.3	0.24	0.62	0.37	-0.74	-0.61	-0.18	-0.34	0.65
68	heart	ENSMUSG00000064367	mt-Nd5	MT	12654	17_84865832	17	84865832	52.2	0.64	1.02	0.63	-1.06	-1.26	-0.18	-0.55	0.76
69	heart	ENSMUSG00000064368	mt-Nd6	MT	13811	17_84865832	17	84865832	37.8	0.62	0.81	0.62	-0.91	-1.08	-0.16	-0.58	0.68
70	heart	ENSMUSG00000064370	mt-Cytb	MT	14716	17_84865832	17	84865832	19.8	0.23	0.71	0.35	-0.75	-0.66	-0.05	-0.35	0.51
71	heart	ENSMUSG00000064351	mt-Co1	MT	6100	17_84877246	17	84877246	13.9	0.1	0.6	0.26	-0.58	-0.28	-0.15	-0.45	0.5
72	heart	ENSMUSG00000065947	mt-Nd4l	MT	10025	17_84888153	17	84888153	6.5	0.14	0.46	0.18	-0.36	-0.26	0.01	-0.27	0.11
73	heart	ENSMUSG00000064360	mt-Nd3	MT	9632	17_84938865	17	84938865	21.4	0.36	0.95	0.27	-0.83	-0.63	-0.16	-0.04	0.07
74	heart	ENSMUSG00000064357	mt-Atp6	MT	8267	19_24687303	19	24687303	6.1	0.26	-0.37	0.37	-0.34	-0.1	-0.11	0.24	0.06
75	heart	ENSMUSG00000064370	mt-Cytb	MT	14716	19_24939407	19	24939407	6.6	0.26	-0.25	0.39	-0.43	-0.16	-0.09	0.15	0.14
76	heart	ENSMUSG00000064360	mt-Nd3	MT	9632	19_37562181	19	37562181	6	-0.24	-0.07	0.16	0.19	0.09	0.57	-0.05	-0.66
77	heart	ENSMUSG00000064356	mt-Atp8	MT	7868	X_139955718	X	139955718	7	0.05	-0.3	0.23	0.09	-0.04	0.39	-0.25	-0.17
78	islet	ENSMUSG00000064354	mt-Co2	MT	7354	1_96351892	1	96351892	6.2	-0.21	-0.29	0.49	-0.25	0.19	-0.35	0.15	0.27
79	islet	ENSMUSG00000064367	mt-Nd5	MT	12654	2_49933282	2	49933282	6.7	-0.14	-0.35	-0.26	-0.18	0.6	0.28	-0.23	0.28
80	islet	ENSMUSG00000064351	mt-Co1	MT	6100	2_69177540	2	69177540	6.1	-0.32	0.04	0.18	0.25	0.57	-0.18	-0.2	-0.35
81	islet	ENSMUSG00000064345	mt-Nd2	MT	4432	2_129746133	2	129746132	6	-0.47	-0.11	0.02	0	0.21	-0.28	0.51	0.12
82	islet	ENSMUSG00000064368	mt-Nd6	MT	13811	2_129746133	2	129746132	7.3	-0.53	-0.3	-0.17	0.15	0.16	0.04	0.55	0.11
83	islet	ENSMUSG00000064354	mt-Co2	MT	7354	2_169122405	2	169122405	6.5	0.03	0.19	-0.18	-0.02	-0.39	-0.38	0.04	0.71
84	islet	ENSMUSG00000064351	mt-Co1	MT	6100	4_35402234	4	35402234	7.4	-0.13	0.36	0.04	-0.03	-0.46	0.08	-0.38	0.53
85	islet	ENSMUSG00000064370	mt-Cytb	MT	14716	4_35402234	4	35402234	6.6	-0.08	0.24	0.02	-0.12	-0.38	0.14	-0.37	0.56
86	islet	ENSMUSG00000064341	mt-Nd1	MT	3229	4_56441426	4	56441426	6	0.03	-0.27	-0.09	0.28	0.03	0.18	-0.53	0.37
87	islet	ENSMUSG00000064363	mt-Nd4	MT	10856	4_117434175	4	117434175	6.9	-0.48	-0.23	0.18	0.11	-0.03	-0.33	0.51	0.27
88	islet	ENSMUSG00000064368	mt-Nd6	MT	13811	4_117435345	4	117435345	6.1	-0.43	-0.11	0.26	0.06	-0.06	-0.35	0.42	0.2
89	islet	ENSMUSG00000064345	mt-Nd2	MT	4432	4_118215305	4	118215305	8.2	-0.45	-0.45	0.23	0.26	0.04	-0.36	0.58	0.16
90	islet	ENSMUSG00000064360	mt-Nd3	MT	9632	6_20528879	6	20528879	6.2	0.01	0.45	-0.06	0.12	0.31	-0.3	-0.51	-0.03
91	islet	ENSMUSG00000064357	mt-Atp6	MT	8267	6_33227528	6	33227528	6.4	0.47	0.08	0.1	-0.26	0.42	-0.08	-0.1	-0.62
92	islet	ENSMUSG00000064370	mt-Cytb	MT	14716	6_35006596	6	35006596	6.6	0.34	0.24	0.25	-0.48	0.13	0.21	-0.32	-0.36
93	islet	ENSMUSG00000064358	mt-Co3	MT	8998	7_25324315	7	25324315	6.1	-0.11	0.25	-0.2	0.23	-0.03	-0.69	0.23	0.31
94	islet	ENSMUSG00000064339	mt-Rnr2	MT	1884	7_36599813	7	36599813	6	-0.06	-0.1	0.22	-0.18	0.54	-0.51	-0.02	0.12
95	islet	ENSMUSG00000064351	mt-Co1	MT	6100	7_82973094	7	82973094	6.5	0.08	0.14	-0.21	0.43	-0.54	0.28	0.21	-0.4
96	islet	ENSMUSG00000064370	mt-Cytb	MT	14716	7_82973094	7	82973094	7.3	0.07	0.27	-0.12	0.51	-0.65	0.15	0.2	-0.44
97	islet	ENSMUSG00000064357	mt-Atp6	MT	8267	7_115002417	7	115002417	7.1	0.09	0.01	-0.85	0.65	0.05	0.13	0.14	-0.22
98	islet	ENSMUSG00000064339	mt-Rnr2	MT	1884	9_68728564	9	68728564	7.5	0.01	0.41	0.11	-0.29	-0.24	-0.39	0.56	-0.17
99	islet	ENSMUSG00000064370	mt-Cytb	MT	14716	11_25682091	11	25682091	6.6	-0.23	0.23	0.51	-0.22	-0.3	-0.33	0.25	0.1
100	islet	ENSMUSG00000064339	mt-Rnr2	MT	1884	11_27002232	11	27002232	7	-0.16	0.54	0.32	0.18	-0.18	-0.54	-0.15	-0.01
101	islet	ENSMUSG00000064341	mt-Nd1	MT	3229	11_27002232	11	27002232	6.8	-0.21	0.43	0.48	0.08	-0.28	-0.47	0.03	-0.06
102	islet	ENSMUSG00000064337	mt-Rnr1	MT	547	11_27233711	11	27233711	10.9	-0.27	0.59	0.44	-0.09	-0.13	-0.82	-0.08	0.36
103	islet	ENSMUSG00000064358	mt-Co3	MT	8998	11_71782692	11	71782692	7.4	0.39	0.16	-0.4	-0.18	-0.41	0.31	0.34	-0.22
104	islet	ENSMUSG00000064356	mt-Atp8	MT	7868	11_71824055	11	71824055	6.4	0.36	0.16	-0.47	-0.16	0.15	0.04	0.2	-0.27
105	islet	ENSMUSG00000064357	mt-Atp6	MT	8267	14_32633019	14	32633018	6.3	0.1	0.33	-0.27	-0.38	-0.51	0.24	0.07	0.43
106	islet	ENSMUSG00000064358	mt-Co3	MT	8998	14_104816009	14	104816009	6.4	0.31	0.08	0.17	-0.71	0.22	-0.11	0.34	-0.31
107	islet	ENSMUSG00000065947	mt-Nd4l	MT	10025	15_74156335	15	74156335	6.8	0.38	-0.26	-0.16	-0.57	-0.03	0.32	0.41	-0.08
108	islet	ENSMUSG00000064337	mt-Rnr1	MT	547	17_84935327	17	84935327	6.9	0.32	0.19	-0.23	0.13	-0.62	-0.38	0.4	0.18
109	islet	ENSMUSG00000064339	mt-Rnr2	MT	1884	18_10973655	18	10973655	7.6	-0.27	-0.02	-0.28	0.79	0	-0.51	0.2	0.09
110	islet	ENSMUSG00000064354	mt-Co2	MT	7354	18_38671614	18	38671614	6.4	-0.05	-0.38	0.28	0.41	-0.15	-0.12	0.32	-0.32
111	islet	ENSMUSG00000064358	mt-Co3	MT	8998	18_43114441	18	43114441	6.3	0.09	-0.15	0.22	0.61	-0.41	-0.41	0.02	0.03
112	islet	ENSMUSG00000064360	mt-Nd3	MT	9632	X_130975660	X	130975660	6.2	0.02	0.22	-0.08	0.31	0.02	-0.39	0.03	-0.12
113	liver	ENSMUSG00000064357	mt-Atp6	MT	8267	1_24524917	1	24524917	6.3	0.17	-0.19	-0.52	-0.1	0.16	0.38	0.07	0.04
114	liver	ENSMUSG00000065947	mt-Nd4l	MT	10025	1_72427504	1	72427504	6.2	-0.28	0.21	0.05	-0.23	-0.18	-0.12	0.19	0.35
115	liver	ENSMUSG00000065947	mt-Nd4l	MT	10025	3_38268133	3	38268133	6.2	0.16	0.6	-0.19	0.25	-0.31	-0.06	-0.1	-0.34
116	liver	ENSMUSG00000064357	mt-Atp6	MT	8267	5_126061603	5	126061603	6.3	0.35	-0.06	-0.42	0.1	0.22	-0.07	-0.4	0.27
117	liver	ENSMUSG00000064360	mt-Nd3	MT	9632	8_10014965	8	10014965	6.1	0.18	-0.28	-0.24	0	-0.32	0.26	0.19	0.21
118	liver	ENSMUSG00000064368	mt-Nd6	MT	13811	8_14625644	8	14625644	6.6	0.2	-0.19	-0.27	0.4	-0.36	-0.19	0.13	0.28
119	liver	ENSMUSG00000065947	mt-Nd4l	MT	10025	8_126076434	8	126076434	6.3	-0.07	0.21	0.36	-0.08	-0.17	0.28	-0.19	-0.35
120	liver	ENSMUSG00000064341	mt-Nd1	MT	3229	9_66202095	9	66202095	7.1	-0.47	0.35	0.08	-0.11	-0.07	-0.08	0.51	-0.21
121	liver	ENSMUSG00000064351	mt-Co1	MT	6100	9_66202095	9	66202095	6.7	-0.43	0.33	0.1	-0.05	-0.09	-0.24	0.49	-0.1
122	liver	ENSMUSG00000065947	mt-Nd4l	MT	10025	9_66202095	9	66202095	6.9	-0.37	0.22	0.26	-0.17	-0.29	-0.12	0.48	-0.01
123	liver	ENSMUSG00000064341	mt-Nd1	MT	3229	10_116939691	10	116939691	6.2	0.08	0.04	0.01	0.45	-0.34	-0.29	0.04	0.02
124	liver	ENSMUSG00000064351	mt-Co1	MT	6100	10_117293308	10	117293308	7	-0.06	0.12	0	0.46	-0.46	-0.22	0.02	0.14
125	liver	ENSMUSG00000064357	mt-Atp6	MT	8267	13_32380479	13	32380479	6.1	0.33	0.11	0.03	-0.42	-0.21	-0.24	0.26	0.14
126	liver	ENSMUSG00000064358	mt-Co3	MT	8998	13_54019192	13	54019192	6.3	-0.08	0.16	0.19	-0.32	-0.18	0.39	-0.23	0.09
127	liver	ENSMUSG00000064345	mt-Nd2	MT	4432	13_68665080	13	68665080	6.4	-0.14	0.41	0.05	-0.38	-0.27	-0.03	0	0.36
128	liver	ENSMUSG00000064360	mt-Nd3	MT	9632	13_95430818	13	95430818	8.1	-0.29	0.09	-0.04	0.53	-0.17	0.25	0.32	-0.68
129	liver	ENSMUSG00000064367	mt-Nd5	MT	12654	14_22076494	14	22076494	6.3	0.17	-0.43	-0.44	0.08	0.39	0.2	0.02	0.02
130	liver	ENSMUSG00000064356	mt-Atp8	MT	7868	15_53327371	15	53327371	6.4	-0.23	0.13	-0.36	0.14	0.27	0.29	0.05	-0.29
131	liver	ENSMUSG00000064339	mt-Rnr2	MT	1884	15_90921942	15	90921942	7.6	-0.07	-0.01	0.35	0.55	-0.03	0.18	-0.85	-0.12
132	liver	ENSMUSG00000064341	mt-Nd1	MT	3229	16_98073378	16	98073378	6.7	-0.03	-0.02	-0.53	0.56	0.16	0.07	0.2	-0.42
133	liver	ENSMUSG00000064341	mt-Nd1	MT	3229	16_98180002	16	98180002	6.7	-0.03	-0.02	-0.53	0.57	0.17	0.07	0.2	-0.43
134	liver	ENSMUSG00000065947	mt-Nd4l	MT	10025	17_70478707	17	70478707	6.7	-0.3	-0.25	0.05	0.02	0.76	-0.24	-0.12	0.08
135	liver	ENSMUSG00000064341	mt-Nd1	MT	3229	17_83624727	17	83624727	6.4	0.06	-0.23	0.16	0.21	0.19	0.11	-0.62	0.14
136	liver	ENSMUSG00000064337	mt-Rnr1	MT	547	18_17083304	18	17083304	6.6	-0.09	0.62	-0.01	0	-0.04	-0.45	0.14	-0.17
137	liver	ENSMUSG00000064339	mt-Rnr2	MT	1884	18_17083304	18	17083304	8.5	-0.09	0.67	-0.12	-0.09	-0.01	-0.52	0.23	-0.09
138	liver	ENSMUSG00000064363	mt-Nd4	MT	10856	18_42218611	18	42218611	6.1	-0.15	0.08	0.52	-0.15	0.15	-0.25	-0.19	-0.01
139	liver	ENSMUSG00000065947	mt-Nd4l	MT	10025	18_42218611	18	42218611	6.8	-0.12	-0.05	0.62	-0.27	0.17	-0.16	-0.16	-0.04
140	liver	ENSMUSG00000064337	mt-Rnr1	MT	547	19_14911365	19	14911365	6.4	-0.17	0.43	-0.18	0.49	0.07	-0.1	-0.08	-0.46
141	muscle	ENSMUSG00000064337	mt-Rnr1	MT	547	1_44716639	1	44716639	6.8	0.06	-0.27	-0.17	-0.46	0.29	0.44	0.3	-0.19
142	muscle	ENSMUSG00000064358	mt-Co3	MT	8998	1_75790268	1	75790268	6.7	0.37	0.28	-0.4	0	0.13	0.28	-0.41	-0.25
143	muscle	ENSMUSG00000064357	mt-Atp6	MT	8267	1_116349427	1	116349427	6.7	0.6	0.08	-0.12	-0.12	-0.17	-0.13	0.21	-0.35
144	muscle	ENSMUSG00000064363	mt-Nd4	MT	10856	4_57856082	4	57856082	6.1	-0.05	-0.18	0.06	-0.2	0.36	-0.3	-0.01	0.32
145	muscle	ENSMUSG00000064357	mt-Atp6	MT	8267	4_106586201	4	106586201	6.9	0.02	0.01	0.4	0.11	-0.14	-0.14	-0.68	0.43
146	muscle	ENSMUSG00000064345	mt-Nd2	MT	4432	5_146643419	5	146643419	7.1	0.11	0.45	-0.14	0.18	-0.34	-0.22	0.28	-0.32
147	muscle	ENSMUSG00000064356	mt-Atp8	MT	7868	5_146643419	5	146643419	6.6	0.05	0.49	-0.13	0.12	-0.29	-0.27	0.37	-0.33
148	muscle	ENSMUSG00000064357	mt-Atp6	MT	8267	7_131877892	7	131877892	7.2	0.15	-0.26	-0.05	0	0.24	0.31	-0.61	0.22
149	muscle	ENSMUSG00000064358	mt-Co3	MT	8998	7_135148510	7	135148510	6.1	0.03	-0.44	-0.14	0.08	0.01	0.48	0.18	-0.18
150	muscle	ENSMUSG00000064339	mt-Rnr2	MT	1884	8_35631534	8	35631534	8.3	0.06	-0.06	-0.24	-0.06	-0.26	0.6	-0.53	0.49
151	muscle	ENSMUSG00000064354	mt-Co2	MT	7354	10_11973281	10	11973281	6.4	0.27	-0.1	-0.2	0.12	-0.11	0.07	0.41	-0.46
152	muscle	ENSMUSG00000064356	mt-Atp8	MT	7868	10_122629781	10	122629781	7.4	0.11	-0.12	-0.45	0.19	-0.36	0.07	0.07	0.49
153	muscle	ENSMUSG00000064337	mt-Rnr1	MT	547	11_28894531	11	28894531	6.7	-0.03	0.57	0.27	0.02	-0.17	-0.36	-0.01	-0.3
154	muscle	ENSMUSG00000064339	mt-Rnr2	MT	1884	11_29376474	11	29376474	6.5	0.1	0.53	0.21	0.12	-0.15	-0.24	-0.09	-0.49
155	muscle	ENSMUSG00000064368	mt-Nd6	MT	13811	17_83235730	17	83235730	6.4	-0.03	0.24	0.09	0.08	-0.47	0.5	-0.27	-0.14
156	muscle	ENSMUSG00000064367	mt-Nd5	MT	12654	17_85775751	17	85775751	6.1	-0.2	0.28	0.05	-0.08	-0.14	0.51	-0.21	-0.21
157	muscle	ENSMUSG00000065947	mt-Nd4l	MT	10025	X_136258035	X	136258035	6.3	0.06	0.02	-0.17	0.09	-0.41	0.51	-0.18	0.08

## Sheet: Supplementary File 1i
Supplementary File 1i. SNP association profile for mt-Nd5 in heart as shown
in Figure 4C.
S.No.	chr	position	csq	lod
1	17	84840141	C||||intergenic_variant||||||||	42.8929
2	17	84789591	C|ENSMUSG00000024120|ENSMUST00000112308|Transcript|intron_variant||||||||-1;C|ENSMUSG00000024120|ENSMUST00000161299|Transcript|intron_variant&non_coding_transcript_variant||||||||-1;C|ENSMUSG00000024120|ENSMUST00000161928|Transcript|intron_variant&non_coding_transcript_variant||||||||-1	41.3579
3	17	84789893	A|ENSMUSG00000024120|ENSMUST00000112308|Transcript|intron_variant||||||||-1;A|ENSMUSG00000024120|ENSMUST00000161299|Transcript|intron_variant&non_coding_transcript_variant||||||||-1;A|ENSMUSG00000024120|ENSMUST00000161928|Transcript|intron_variant&non_coding_transcript_variant||||||||-1	41.3579
4	17	84790103	C|ENSMUSG00000024120|ENSMUST00000112308|Transcript|intron_variant||||||||-1;C|ENSMUSG00000024120|ENSMUST00000161299|Transcript|intron_variant&non_coding_transcript_variant||||||||-1;C|ENSMUSG00000024120|ENSMUST00000161928|Transcript|intron_variant&non_coding_transcript_variant||||||||-1	41.3579
5	17	84790156	T|ENSMUSG00000024120|ENSMUST00000112308|Transcript|intron_variant||||||||-1;T|ENSMUSG00000024120|ENSMUST00000161299|Transcript|intron_variant&non_coding_transcript_variant||||||||-1;T|ENSMUSG00000024120|ENSMUST00000161928|Transcript|intron_variant&non_coding_transcript_variant||||||||-1	41.3579
6	17	84790281	G|ENSMUSG00000024120|ENSMUST00000112308|Transcript|intron_variant||||||||-1;G|ENSMUSG00000024120|ENSMUST00000161299|Transcript|intron_variant&non_coding_transcript_variant||||||||-1;G|ENSMUSG00000024120|ENSMUST00000161928|Transcript|intron_variant&non_coding_transcript_variant||||||||-1	41.3579
7	17	84712400	G|ENSMUSG00000024120|ENSMUST00000162799|Transcript|downstream_gene_variant|||||||384|-1;G|ENSMUSG00000024120|ENSMUST00000112308|Transcript|intron_variant||||||||-1	41.324
8	17	84748361	G|ENSMUSG00000024120|ENSMUST00000160011|Transcript|intron_variant&NMD_transcript_variant||||||||-1;G|ENSMUSG00000024120|ENSMUST00000160414|Transcript|downstream_gene_variant|||||||420|-1;G|ENSMUSG00000024120|ENSMUST00000112308|Transcript|intron_variant||||||||-1	41.324
9	17	84750935	G|ENSMUSG00000024120|ENSMUST00000160011|Transcript|intron_variant&NMD_transcript_variant||||||||-1;G|ENSMUSG00000024120|ENSMUST00000160414|Transcript|intron_variant&non_coding_transcript_variant||||||||-1;G|ENSMUSG00000024120|ENSMUST00000112308|Transcript|intron_variant||||||||-1	41.324
10	17	84756548	C|ENSMUSG00000024120|ENSMUST00000112308|Transcript|intron_variant||||||||-1	41.324
11	17	84758601	G|ENSMUSG00000024120|ENSMUST00000112308|Transcript|intron_variant||||||||-1	41.324
12	17	84759658	A|ENSMUSG00000024120|ENSMUST00000112308|Transcript|intron_variant||||||||-1	41.324
13	17	84761828	G|ENSMUSG00000024120|ENSMUST00000112308|Transcript|intron_variant||||||||-1;G|ENSMUSG00000024120|ENSMUST00000161928|Transcript|downstream_gene_variant|||||||4600|-1	41.324
14	17	84761892	A|ENSMUSG00000024120|ENSMUST00000112308|Transcript|intron_variant||||||||-1;A|ENSMUSG00000024120|ENSMUST00000161928|Transcript|downstream_gene_variant|||||||4536|-1	41.324
15	17	84767082	C|ENSMUSG00000024120|ENSMUST00000112308|Transcript|missense_variant|1441|1396|466|K/E|Aaa/Gaa|||-1;C|ENSMUSG00000024120|ENSMUST00000159222|Transcript|downstream_gene_variant|||||||3355|-1;C|ENSMUSG00000024120|ENSMUST00000161299|Transcript|downstream_gene_variant|||||||507|-1;C|ENSMUSG00000024120|ENSMUST00000161928|Transcript|non_coding_transcript_exon_variant&non_coding_transcript_variant|2221|||…	41.324
16	17	84772757	T|ENSMUSG00000024120|ENSMUST00000112308|Transcript|intron_variant||||||||-1;T|ENSMUSG00000024120|ENSMUST00000159222|Transcript|intron_variant&non_coding_transcript_variant||||||||-1;T|ENSMUSG00000024120|ENSMUST00000161299|Transcript|intron_variant&non_coding_transcript_variant||||||||-1;T|ENSMUSG00000024120|ENSMUST00000161928|Transcript|intron_variant&non_coding_transcript_variant||||||||-1	41.324
17	17	84774092	G|ENSMUSG00000024120|ENSMUST00000112308|Transcript|intron_variant||||||||-1;G|ENSMUSG00000024120|ENSMUST00000159222|Transcript|intron_variant&non_coding_transcript_variant||||||||-1;G|ENSMUSG00000024120|ENSMUST00000161299|Transcript|intron_variant&non_coding_transcript_variant||||||||-1;G|ENSMUSG00000024120|ENSMUST00000161928|Transcript|intron_variant&non_coding_transcript_variant||||||||-1	41.324
18	17	84775459	C|ENSMUSG00000024120|ENSMUST00000112308|Transcript|synonymous_variant|441|396|132|L|ctC/ctG|||-1;C|ENSMUSG00000024120|ENSMUST00000159222|Transcript|non_coding_transcript_exon_variant&non_coding_transcript_variant|294|||||||-1;C|ENSMUSG00000024120|ENSMUST00000161299|Transcript|non_coding_transcript_exon_variant&non_coding_transcript_variant|445|||||||-1;C|ENSMUSG00000024120|ENSMUST00000161928|Tran…	41.324
19	17	84776133	T|ENSMUSG00000024120|ENSMUST00000112308|Transcript|intron_variant||||||||-1;T|ENSMUSG00000024120|ENSMUST00000159222|Transcript|intron_variant&non_coding_transcript_variant||||||||-1;T|ENSMUSG00000024120|ENSMUST00000161299|Transcript|intron_variant&non_coding_transcript_variant||||||||-1;T|ENSMUSG00000024120|ENSMUST00000161928|Transcript|intron_variant&non_coding_transcript_variant||||||||-1	41.324
20	17	84776334	C|ENSMUSG00000024120|ENSMUST00000112308|Transcript|intron_variant||||||||-1;C|ENSMUSG00000024120|ENSMUST00000159222|Transcript|intron_variant&non_coding_transcript_variant||||||||-1;C|ENSMUSG00000024120|ENSMUST00000161299|Transcript|intron_variant&non_coding_transcript_variant||||||||-1;C|ENSMUSG00000024120|ENSMUST00000161928|Transcript|intron_variant&non_coding_transcript_variant||||||||-1	41.324
21	17	84776335	C|ENSMUSG00000024120|ENSMUST00000112308|Transcript|intron_variant||||||||-1;C|ENSMUSG00000024120|ENSMUST00000159222|Transcript|intron_variant&non_coding_transcript_variant||||||||-1;C|ENSMUSG00000024120|ENSMUST00000161299|Transcript|intron_variant&non_coding_transcript_variant||||||||-1;C|ENSMUSG00000024120|ENSMUST00000161928|Transcript|intron_variant&non_coding_transcript_variant||||||||-1	41.324
22	17	84776824	G|ENSMUSG00000024120|ENSMUST00000112308|Transcript|intron_variant||||||||-1;G|ENSMUSG00000024120|ENSMUST00000159222|Transcript|intron_variant&non_coding_transcript_variant||||||||-1;G|ENSMUSG00000024120|ENSMUST00000161299|Transcript|intron_variant&non_coding_transcript_variant||||||||-1;G|ENSMUSG00000024120|ENSMUST00000161928|Transcript|intron_variant&non_coding_transcript_variant||||||||-1	41.324
23	17	84777065	G|ENSMUSG00000024120|ENSMUST00000112308|Transcript|synonymous_variant|264|219|73|A|gcT/gcC|||-1;G|ENSMUSG00000024120|ENSMUST00000159222|Transcript|non_coding_transcript_exon_variant&non_coding_transcript_variant|117|||||||-1;G|ENSMUSG00000024120|ENSMUST00000161299|Transcript|non_coding_transcript_exon_variant&non_coding_transcript_variant|268|||||||-1;G|ENSMUSG00000024120|ENSMUST00000161928|Trans…	41.324
24	17	84777224	C|ENSMUSG00000024120|ENSMUST00000112308|Transcript|intron_variant||||||||-1;C|ENSMUSG00000024120|ENSMUST00000159222|Transcript|intron_variant&non_coding_transcript_variant||||||||-1;C|ENSMUSG00000024120|ENSMUST00000161299|Transcript|intron_variant&non_coding_transcript_variant||||||||-1;C|ENSMUSG00000024120|ENSMUST00000161928|Transcript|intron_variant&non_coding_transcript_variant||||||||-1	41.324
25	17	84777244	C|ENSMUSG00000024120|ENSMUST00000112308|Transcript|intron_variant||||||||-1;C|ENSMUSG00000024120|ENSMUST00000159222|Transcript|intron_variant&non_coding_transcript_variant||||||||-1;C|ENSMUSG00000024120|ENSMUST00000161299|Transcript|intron_variant&non_coding_transcript_variant||||||||-1;C|ENSMUSG00000024120|ENSMUST00000161928|Transcript|intron_variant&non_coding_transcript_variant||||||||-1	41.324
26	17	84777506	G|ENSMUSG00000024120|ENSMUST00000112308|Transcript|intron_variant||||||||-1;G|ENSMUSG00000024120|ENSMUST00000159222|Transcript|non_coding_transcript_exon_variant&non_coding_transcript_variant|38|||||||-1;G|ENSMUSG00000024120|ENSMUST00000161299|Transcript|intron_variant&non_coding_transcript_variant||||||||-1;G|ENSMUSG00000024120|ENSMUST00000161928|Transcript|intron_variant&non_coding_transcript_v…	41.324
27	17	84777772	C|ENSMUSG00000024120|ENSMUST00000112308|Transcript|intron_variant||||||||-1;C|ENSMUSG00000024120|ENSMUST00000159222|Transcript|upstream_gene_variant|||||||229|-1;C|ENSMUSG00000024120|ENSMUST00000161299|Transcript|intron_variant&non_coding_transcript_variant||||||||-1;C|ENSMUSG00000024120|ENSMUST00000161928|Transcript|intron_variant&non_coding_transcript_variant||||||||-1	41.324
28	17	84778019	C|ENSMUSG00000024120|ENSMUST00000112308|Transcript|intron_variant||||||||-1;C|ENSMUSG00000024120|ENSMUST00000159222|Transcript|upstream_gene_variant|||||||476|-1;C|ENSMUSG00000024120|ENSMUST00000161299|Transcript|intron_variant&non_coding_transcript_variant||||||||-1;C|ENSMUSG00000024120|ENSMUST00000161928|Transcript|intron_variant&non_coding_transcript_variant||||||||-1	41.324
29	17	84778050	G|ENSMUSG00000024120|ENSMUST00000112308|Transcript|intron_variant||||||||-1;G|ENSMUSG00000024120|ENSMUST00000159222|Transcript|upstream_gene_variant|||||||507|-1;G|ENSMUSG00000024120|ENSMUST00000161299|Transcript|intron_variant&non_coding_transcript_variant||||||||-1;G|ENSMUSG00000024120|ENSMUST00000161928|Transcript|intron_variant&non_coding_transcript_variant||||||||-1	41.324
30	17	84778899	T|ENSMUSG00000024120|ENSMUST00000112308|Transcript|intron_variant||||||||-1;T|ENSMUSG00000024120|ENSMUST00000159222|Transcript|upstream_gene_variant|||||||1356|-1;T|ENSMUSG00000024120|ENSMUST00000161299|Transcript|intron_variant&non_coding_transcript_variant||||||||-1;T|ENSMUSG00000024120|ENSMUST00000161928|Transcript|intron_variant&non_coding_transcript_variant||||||||-1	41.324
31	17	84778990	T|ENSMUSG00000024120|ENSMUST00000112308|Transcript|intron_variant||||||||-1;T|ENSMUSG00000024120|ENSMUST00000159222|Transcript|upstream_gene_variant|||||||1447|-1;T|ENSMUSG00000024120|ENSMUST00000161299|Transcript|intron_variant&non_coding_transcript_variant||||||||-1;T|ENSMUSG00000024120|ENSMUST00000161928|Transcript|intron_variant&non_coding_transcript_variant||||||||-1	41.324
32	17	84779199	A|ENSMUSG00000024120|ENSMUST00000112308|Transcript|intron_variant||||||||-1;A|ENSMUSG00000024120|ENSMUST00000159222|Transcript|upstream_gene_variant|||||||1656|-1;A|ENSMUSG00000024120|ENSMUST00000161299|Transcript|intron_variant&non_coding_transcript_variant||||||||-1;A|ENSMUSG00000024120|ENSMUST00000161928|Transcript|intron_variant&non_coding_transcript_variant||||||||-1	41.324
33	17	84779336	G|ENSMUSG00000024120|ENSMUST00000112308|Transcript|intron_variant||||||||-1;G|ENSMUSG00000024120|ENSMUST00000159222|Transcript|upstream_gene_variant|||||||1793|-1;G|ENSMUSG00000024120|ENSMUST00000161299|Transcript|intron_variant&non_coding_transcript_variant||||||||-1;G|ENSMUSG00000024120|ENSMUST00000161928|Transcript|intron_variant&non_coding_transcript_variant||||||||-1	41.324
34	17	84779512	T|ENSMUSG00000024120|ENSMUST00000112308|Transcript|intron_variant||||||||-1;T|ENSMUSG00000024120|ENSMUST00000159222|Transcript|upstream_gene_variant|||||||1969|-1;T|ENSMUSG00000024120|ENSMUST00000161299|Transcript|intron_variant&non_coding_transcript_variant||||||||-1;T|ENSMUSG00000024120|ENSMUST00000161928|Transcript|intron_variant&non_coding_transcript_variant||||||||-1	41.324
35	17	84779724	G|ENSMUSG00000024120|ENSMUST00000112308|Transcript|intron_variant||||||||-1;G|ENSMUSG00000024120|ENSMUST00000159222|Transcript|upstream_gene_variant|||||||2181|-1;G|ENSMUSG00000024120|ENSMUST00000161299|Transcript|intron_variant&non_coding_transcript_variant||||||||-1;G|ENSMUSG00000024120|ENSMUST00000161928|Transcript|intron_variant&non_coding_transcript_variant||||||||-1	41.324
36	17	84780106	A|ENSMUSG00000024120|ENSMUST00000112308|Transcript|intron_variant||||||||-1;A|ENSMUSG00000024120|ENSMUST00000159222|Transcript|upstream_gene_variant|||||||2563|-1;A|ENSMUSG00000024120|ENSMUST00000161299|Transcript|intron_variant&non_coding_transcript_variant||||||||-1;A|ENSMUSG00000024120|ENSMUST00000161928|Transcript|intron_variant&non_coding_transcript_variant||||||||-1	41.324
37	17	84780173	C|ENSMUSG00000024120|ENSMUST00000112308|Transcript|intron_variant||||||||-1;C|ENSMUSG00000024120|ENSMUST00000159222|Transcript|upstream_gene_variant|||||||2630|-1;C|ENSMUSG00000024120|ENSMUST00000161299|Transcript|intron_variant&non_coding_transcript_variant||||||||-1;C|ENSMUSG00000024120|ENSMUST00000161928|Transcript|intron_variant&non_coding_transcript_variant||||||||-1	41.324
38	17	84780269	T|ENSMUSG00000024120|ENSMUST00000112308|Transcript|intron_variant||||||||-1;T|ENSMUSG00000024120|ENSMUST00000159222|Transcript|upstream_gene_variant|||||||2726|-1;T|ENSMUSG00000024120|ENSMUST00000161299|Transcript|intron_variant&non_coding_transcript_variant||||||||-1;T|ENSMUSG00000024120|ENSMUST00000161928|Transcript|intron_variant&non_coding_transcript_variant||||||||-1	41.324
39	17	84780292	T|ENSMUSG00000024120|ENSMUST00000112308|Transcript|intron_variant||||||||-1;T|ENSMUSG00000024120|ENSMUST00000159222|Transcript|upstream_gene_variant|||||||2749|-1;T|ENSMUSG00000024120|ENSMUST00000161299|Transcript|intron_variant&non_coding_transcript_variant||||||||-1;T|ENSMUSG00000024120|ENSMUST00000161928|Transcript|intron_variant&non_coding_transcript_variant||||||||-1	41.324
40	17	84780440	C|ENSMUSG00000024120|ENSMUST00000112308|Transcript|intron_variant||||||||-1;C|ENSMUSG00000024120|ENSMUST00000159222|Transcript|upstream_gene_variant|||||||2897|-1;C|ENSMUSG00000024120|ENSMUST00000161299|Transcript|intron_variant&non_coding_transcript_variant||||||||-1;C|ENSMUSG00000024120|ENSMUST00000161928|Transcript|intron_variant&non_coding_transcript_variant||||||||-1	41.324
41	17	84780459	G|ENSMUSG00000024120|ENSMUST00000112308|Transcript|intron_variant||||||||-1;G|ENSMUSG00000024120|ENSMUST00000159222|Transcript|upstream_gene_variant|||||||2916|-1;G|ENSMUSG00000024120|ENSMUST00000161299|Transcript|intron_variant&non_coding_transcript_variant||||||||-1;G|ENSMUSG00000024120|ENSMUST00000161928|Transcript|intron_variant&non_coding_transcript_variant||||||||-1	41.324
42	17	84780982	A|ENSMUSG00000024120|ENSMUST00000112308|Transcript|intron_variant||||||||-1;A|ENSMUSG00000024120|ENSMUST00000159222|Transcript|upstream_gene_variant|||||||3439|-1;A|ENSMUSG00000024120|ENSMUST00000161299|Transcript|intron_variant&non_coding_transcript_variant||||||||-1;A|ENSMUSG00000024120|ENSMUST00000161928|Transcript|intron_variant&non_coding_transcript_variant||||||||-1	41.324
43	17	84781183	G|ENSMUSG00000024120|ENSMUST00000112308|Transcript|intron_variant||||||||-1;G|ENSMUSG00000024120|ENSMUST00000159222|Transcript|upstream_gene_variant|||||||3640|-1;G|ENSMUSG00000024120|ENSMUST00000161299|Transcript|intron_variant&non_coding_transcript_variant||||||||-1;G|ENSMUSG00000024120|ENSMUST00000161928|Transcript|intron_variant&non_coding_transcript_variant||||||||-1	41.324
44	17	84781425	C|ENSMUSG00000024120|ENSMUST00000112308|Transcript|intron_variant||||||||-1;C|ENSMUSG00000024120|ENSMUST00000159222|Transcript|upstream_gene_variant|||||||3882|-1;C|ENSMUSG00000024120|ENSMUST00000161299|Transcript|intron_variant&non_coding_transcript_variant||||||||-1;C|ENSMUSG00000024120|ENSMUST00000161928|Transcript|intron_variant&non_coding_transcript_variant||||||||-1	41.324
45	17	84782005	G|ENSMUSG00000024120|ENSMUST00000112308|Transcript|intron_variant||||||||-1;G|ENSMUSG00000024120|ENSMUST00000159222|Transcript|upstream_gene_variant|||||||4462|-1;G|ENSMUSG00000024120|ENSMUST00000161299|Transcript|intron_variant&non_coding_transcript_variant||||||||-1;G|ENSMUSG00000024120|ENSMUST00000161928|Transcript|intron_variant&non_coding_transcript_variant||||||||-1	41.324
46	17	84782217	A|ENSMUSG00000024120|ENSMUST00000112308|Transcript|intron_variant||||||||-1;A|ENSMUSG00000024120|ENSMUST00000159222|Transcript|upstream_gene_variant|||||||4674|-1;A|ENSMUSG00000024120|ENSMUST00000161299|Transcript|intron_variant&non_coding_transcript_variant||||||||-1;A|ENSMUSG00000024120|ENSMUST00000161928|Transcript|intron_variant&non_coding_transcript_variant||||||||-1	41.324
47	17	84782260	A|ENSMUSG00000024120|ENSMUST00000112308|Transcript|intron_variant||||||||-1;A|ENSMUSG00000024120|ENSMUST00000159222|Transcript|upstream_gene_variant|||||||4717|-1;A|ENSMUSG00000024120|ENSMUST00000161299|Transcript|intron_variant&non_coding_transcript_variant||||||||-1;A|ENSMUSG00000024120|ENSMUST00000161928|Transcript|intron_variant&non_coding_transcript_variant||||||||-1	41.324
48	17	84782267	A|ENSMUSG00000024120|ENSMUST00000112308|Transcript|intron_variant||||||||-1;A|ENSMUSG00000024120|ENSMUST00000159222|Transcript|upstream_gene_variant|||||||4724|-1;A|ENSMUSG00000024120|ENSMUST00000161299|Transcript|intron_variant&non_coding_transcript_variant||||||||-1;A|ENSMUSG00000024120|ENSMUST00000161928|Transcript|intron_variant&non_coding_transcript_variant||||||||-1	41.324
49	17	84782513	C|ENSMUSG00000024120|ENSMUST00000112308|Transcript|intron_variant||||||||-1;C|ENSMUSG00000024120|ENSMUST00000159222|Transcript|upstream_gene_variant|||||||4970|-1;C|ENSMUSG00000024120|ENSMUST00000161299|Transcript|intron_variant&non_coding_transcript_variant||||||||-1;C|ENSMUSG00000024120|ENSMUST00000161928|Transcript|intron_variant&non_coding_transcript_variant||||||||-1	41.324
50	17	84782553	A|ENSMUSG00000024120|ENSMUST00000112308|Transcript|intron_variant||||||||-1;A|ENSMUSG00000024120|ENSMUST00000161299|Transcript|intron_variant&non_coding_transcript_variant||||||||-1;A|ENSMUSG00000024120|ENSMUST00000161928|Transcript|intron_variant&non_coding_transcript_variant||||||||-1	41.324
51	17	84782588	G|ENSMUSG00000024120|ENSMUST00000112308|Transcript|intron_variant||||||||-1;G|ENSMUSG00000024120|ENSMUST00000161299|Transcript|intron_variant&non_coding_transcript_variant||||||||-1;G|ENSMUSG00000024120|ENSMUST00000161928|Transcript|intron_variant&non_coding_transcript_variant||||||||-1	41.324
52	17	84783010	C|ENSMUSG00000024120|ENSMUST00000112308|Transcript|intron_variant||||||||-1;C|ENSMUSG00000024120|ENSMUST00000161299|Transcript|intron_variant&non_coding_transcript_variant||||||||-1;C|ENSMUSG00000024120|ENSMUST00000161928|Transcript|intron_variant&non_coding_transcript_variant||||||||-1	41.324
53	17	84783136	C|ENSMUSG00000024120|ENSMUST00000112308|Transcript|intron_variant||||||||-1;C|ENSMUSG00000024120|ENSMUST00000161299|Transcript|intron_variant&non_coding_transcript_variant||||||||-1;C|ENSMUSG00000024120|ENSMUST00000161928|Transcript|intron_variant&non_coding_transcript_variant||||||||-1	41.324
54	17	84783305	C|ENSMUSG00000024120|ENSMUST00000112308|Transcript|intron_variant||||||||-1;C|ENSMUSG00000024120|ENSMUST00000161299|Transcript|intron_variant&non_coding_transcript_variant||||||||-1;C|ENSMUSG00000024120|ENSMUST00000161928|Transcript|intron_variant&non_coding_transcript_variant||||||||-1	41.324
55	17	84783595	C|ENSMUSG00000024120|ENSMUST00000112308|Transcript|intron_variant||||||||-1;C|ENSMUSG00000024120|ENSMUST00000161299|Transcript|intron_variant&non_coding_transcript_variant||||||||-1;C|ENSMUSG00000024120|ENSMUST00000161928|Transcript|intron_variant&non_coding_transcript_variant||||||||-1	41.324
56	17	84783625	A|ENSMUSG00000024120|ENSMUST00000112308|Transcript|intron_variant||||||||-1;A|ENSMUSG00000024120|ENSMUST00000161299|Transcript|intron_variant&non_coding_transcript_variant||||||||-1;A|ENSMUSG00000024120|ENSMUST00000161928|Transcript|intron_variant&non_coding_transcript_variant||||||||-1	41.324
57	17	84783646	A|ENSMUSG00000024120|ENSMUST00000112308|Transcript|intron_variant||||||||-1;A|ENSMUSG00000024120|ENSMUST00000161299|Transcript|intron_variant&non_coding_transcript_variant||||||||-1;A|ENSMUSG00000024120|ENSMUST00000161928|Transcript|intron_variant&non_coding_transcript_variant||||||||-1	41.324
58	17	84783769	T|ENSMUSG00000024120|ENSMUST00000112308|Transcript|intron_variant||||||||-1;T|ENSMUSG00000024120|ENSMUST00000161299|Transcript|intron_variant&non_coding_transcript_variant||||||||-1;T|ENSMUSG00000024120|ENSMUST00000161928|Transcript|intron_variant&non_coding_transcript_variant||||||||-1	41.324
59	17	84783785	C|ENSMUSG00000024120|ENSMUST00000112308|Transcript|intron_variant||||||||-1;C|ENSMUSG00000024120|ENSMUST00000161299|Transcript|intron_variant&non_coding_transcript_variant||||||||-1;C|ENSMUSG00000024120|ENSMUST00000161928|Transcript|intron_variant&non_coding_transcript_variant||||||||-1	41.324
60	17	84783988	T|ENSMUSG00000024120|ENSMUST00000112308|Transcript|intron_variant||||||||-1;T|ENSMUSG00000024120|ENSMUST00000161299|Transcript|intron_variant&non_coding_transcript_variant||||||||-1;T|ENSMUSG00000024120|ENSMUST00000161928|Transcript|intron_variant&non_coding_transcript_variant||||||||-1	41.324
61	17	84784740	T|ENSMUSG00000024120|ENSMUST00000112308|Transcript|intron_variant||||||||-1;G|ENSMUSG00000024120|ENSMUST00000112308|Transcript|intron_variant||||||||-1;T|ENSMUSG00000024120|ENSMUST00000161299|Transcript|intron_variant&non_coding_transcript_variant||||||||-1;G|ENSMUSG00000024120|ENSMUST00000161299|Transcript|intron_variant&non_coding_transcript_variant||||||||-1;T|ENSMUSG00000024120|ENSMUST0000016…	41.324
62	17	84784782	T|ENSMUSG00000024120|ENSMUST00000112308|Transcript|intron_variant||||||||-1;T|ENSMUSG00000024120|ENSMUST00000161299|Transcript|intron_variant&non_coding_transcript_variant||||||||-1;T|ENSMUSG00000024120|ENSMUST00000161928|Transcript|intron_variant&non_coding_transcript_variant||||||||-1	41.324
63	17	84785187	G|ENSMUSG00000024120|ENSMUST00000112308|Transcript|intron_variant||||||||-1;G|ENSMUSG00000024120|ENSMUST00000161299|Transcript|intron_variant&non_coding_transcript_variant||||||||-1;G|ENSMUSG00000024120|ENSMUST00000161928|Transcript|intron_variant&non_coding_transcript_variant||||||||-1	41.324
64	17	84785204	G|ENSMUSG00000024120|ENSMUST00000112308|Transcript|intron_variant||||||||-1;G|ENSMUSG00000024120|ENSMUST00000161299|Transcript|intron_variant&non_coding_transcript_variant||||||||-1;G|ENSMUSG00000024120|ENSMUST00000161928|Transcript|intron_variant&non_coding_transcript_variant||||||||-1	41.324
65	17	84785205	A|ENSMUSG00000024120|ENSMUST00000112308|Transcript|intron_variant||||||||-1;A|ENSMUSG00000024120|ENSMUST00000161299|Transcript|intron_variant&non_coding_transcript_variant||||||||-1;A|ENSMUSG00000024120|ENSMUST00000161928|Transcript|intron_variant&non_coding_transcript_variant||||||||-1	41.324
66	17	84785761	G|ENSMUSG00000024120|ENSMUST00000112308|Transcript|intron_variant||||||||-1;G|ENSMUSG00000024120|ENSMUST00000161299|Transcript|intron_variant&non_coding_transcript_variant||||||||-1;G|ENSMUSG00000024120|ENSMUST00000161928|Transcript|intron_variant&non_coding_transcript_variant||||||||-1	41.324
67	17	84785945	C|ENSMUSG00000024120|ENSMUST00000112308|Transcript|intron_variant||||||||-1;C|ENSMUSG00000024120|ENSMUST00000161299|Transcript|intron_variant&non_coding_transcript_variant||||||||-1;C|ENSMUSG00000024120|ENSMUST00000161928|Transcript|intron_variant&non_coding_transcript_variant||||||||-1	41.324
68	17	84786883	T|ENSMUSG00000024120|ENSMUST00000112308|Transcript|intron_variant||||||||-1;T|ENSMUSG00000024120|ENSMUST00000161299|Transcript|intron_variant&non_coding_transcript_variant||||||||-1;T|ENSMUSG00000024120|ENSMUST00000161928|Transcript|intron_variant&non_coding_transcript_variant||||||||-1	41.324
69	17	84786953	C|ENSMUSG00000024120|ENSMUST00000112308|Transcript|intron_variant||||||||-1;C|ENSMUSG00000024120|ENSMUST00000161299|Transcript|intron_variant&non_coding_transcript_variant||||||||-1;C|ENSMUSG00000024120|ENSMUST00000161928|Transcript|intron_variant&non_coding_transcript_variant||||||||-1	41.324
70	17	84787458	C|ENSMUSG00000024120|ENSMUST00000112308|Transcript|intron_variant||||||||-1;C|ENSMUSG00000024120|ENSMUST00000161299|Transcript|intron_variant&non_coding_transcript_variant||||||||-1;C|ENSMUSG00000024120|ENSMUST00000161928|Transcript|intron_variant&non_coding_transcript_variant||||||||-1	41.324
71	17	84787828	G|ENSMUSG00000024120|ENSMUST00000112308|Transcript|intron_variant||||||||-1;G|ENSMUSG00000024120|ENSMUST00000161299|Transcript|intron_variant&non_coding_transcript_variant||||||||-1;G|ENSMUSG00000024120|ENSMUST00000161928|Transcript|intron_variant&non_coding_transcript_variant||||||||-1	41.324
72	17	84787854	G|ENSMUSG00000024120|ENSMUST00000112308|Transcript|intron_variant||||||||-1;G|ENSMUSG00000024120|ENSMUST00000161299|Transcript|intron_variant&non_coding_transcript_variant||||||||-1;G|ENSMUSG00000024120|ENSMUST00000161928|Transcript|intron_variant&non_coding_transcript_variant||||||||-1	41.324
73	17	84787926	A|ENSMUSG00000024120|ENSMUST00000112308|Transcript|intron_variant||||||||-1;T|ENSMUSG00000024120|ENSMUST00000112308|Transcript|intron_variant||||||||-1;A|ENSMUSG00000024120|ENSMUST00000161299|Transcript|intron_variant&non_coding_transcript_variant||||||||-1;T|ENSMUSG00000024120|ENSMUST00000161299|Transcript|intron_variant&non_coding_transcript_variant||||||||-1;A|ENSMUSG00000024120|ENSMUST0000016…	41.324
74	17	84788722	G|ENSMUSG00000024120|ENSMUST00000112308|Transcript|intron_variant||||||||-1;G|ENSMUSG00000024120|ENSMUST00000161299|Transcript|intron_variant&non_coding_transcript_variant||||||||-1;G|ENSMUSG00000024120|ENSMUST00000161928|Transcript|intron_variant&non_coding_transcript_variant||||||||-1	41.324
75	17	84789509	G|ENSMUSG00000024120|ENSMUST00000112308|Transcript|intron_variant||||||||-1;G|ENSMUSG00000024120|ENSMUST00000161299|Transcript|intron_variant&non_coding_transcript_variant||||||||-1;G|ENSMUSG00000024120|ENSMUST00000161928|Transcript|intron_variant&non_coding_transcript_variant||||||||-1	41.324
76	17	83818123	T|ENSMUSG00000055817|ENSMUST00000067826|Transcript|downstream_gene_variant|||||||3218|1;T|ENSMUSG00000055817|ENSMUST00000176054|Transcript|intron_variant||||||||1;T|ENSMUSG00000055817|ENSMUST00000177069|Transcript|intron_variant&NMD_transcript_variant||||||||1	37.6988
77	17	83818172	G|ENSMUSG00000055817|ENSMUST00000067826|Transcript|downstream_gene_variant|||||||3267|1;G|ENSMUSG00000055817|ENSMUST00000176054|Transcript|intron_variant||||||||1;G|ENSMUSG00000055817|ENSMUST00000177069|Transcript|intron_variant&NMD_transcript_variant||||||||1	37.6988
78	17	83818179	T|ENSMUSG00000055817|ENSMUST00000067826|Transcript|downstream_gene_variant|||||||3274|1;T|ENSMUSG00000055817|ENSMUST00000176054|Transcript|intron_variant||||||||1;T|ENSMUSG00000055817|ENSMUST00000177069|Transcript|intron_variant&NMD_transcript_variant||||||||1	37.6988
79	17	83818768	C|ENSMUSG00000055817|ENSMUST00000067826|Transcript|downstream_gene_variant|||||||3863|1;C|ENSMUSG00000055817|ENSMUST00000176054|Transcript|intron_variant||||||||1;C|ENSMUSG00000055817|ENSMUST00000177069|Transcript|intron_variant&NMD_transcript_variant||||||||1	37.6988
80	17	83820509	C|ENSMUSG00000055817|ENSMUST00000176054|Transcript|downstream_gene_variant|||||||293|1;C|ENSMUSG00000055817|ENSMUST00000177069|Transcript|3_prime_UTR_variant&NMD_transcript_variant|2280|||||||1	37.6988
81	17	83820908	T|ENSMUSG00000055817|ENSMUST00000176054|Transcript|downstream_gene_variant|||||||692|1;T|ENSMUSG00000055817|ENSMUST00000177069|Transcript|3_prime_UTR_variant&NMD_transcript_variant|2679|||||||1	37.6988
82	17	83823769	T|ENSMUSG00000055817|ENSMUST00000176054|Transcript|downstream_gene_variant|||||||3553|1;T|ENSMUSG00000055817|ENSMUST00000177069|Transcript|downstream_gene_variant|||||||2253|1	37.6988
83	17	83824149	G|ENSMUSG00000055817|ENSMUST00000176054|Transcript|downstream_gene_variant|||||||3933|1;G|ENSMUSG00000055817|ENSMUST00000177069|Transcript|downstream_gene_variant|||||||2633|1	37.6988
84	17	84789592	A|ENSMUSG00000024120|ENSMUST00000112308|Transcript|intron_variant||||||||-1;A|ENSMUSG00000024120|ENSMUST00000161299|Transcript|intron_variant&non_coding_transcript_variant||||||||-1;A|ENSMUSG00000024120|ENSMUST00000161928|Transcript|intron_variant&non_coding_transcript_variant||||||||-1	37.6282
85	17	84789614	A|ENSMUSG00000024120|ENSMUST00000112308|Transcript|intron_variant||||||||-1;A|ENSMUSG00000024120|ENSMUST00000161299|Transcript|intron_variant&non_coding_transcript_variant||||||||-1;A|ENSMUSG00000024120|ENSMUST00000161928|Transcript|intron_variant&non_coding_transcript_variant||||||||-1	37.6282
86	17	84789656	T|ENSMUSG00000024120|ENSMUST00000112308|Transcript|intron_variant||||||||-1;T|ENSMUSG00000024120|ENSMUST00000161299|Transcript|intron_variant&non_coding_transcript_variant||||||||-1;T|ENSMUSG00000024120|ENSMUST00000161928|Transcript|intron_variant&non_coding_transcript_variant||||||||-1	37.6282
87	17	84780590	C|ENSMUSG00000024120|ENSMUST00000112308|Transcript|intron_variant||||||||-1;C|ENSMUSG00000024120|ENSMUST00000159222|Transcript|upstream_gene_variant|||||||3047|-1;C|ENSMUSG00000024120|ENSMUST00000161299|Transcript|intron_variant&non_coding_transcript_variant||||||||-1;C|ENSMUSG00000024120|ENSMUST00000161928|Transcript|intron_variant&non_coding_transcript_variant||||||||-1	37.5848
88	17	84780874	A|ENSMUSG00000024120|ENSMUST00000112308|Transcript|intron_variant||||||||-1;A|ENSMUSG00000024120|ENSMUST00000159222|Transcript|upstream_gene_variant|||||||3331|-1;A|ENSMUSG00000024120|ENSMUST00000161299|Transcript|intron_variant&non_coding_transcript_variant||||||||-1;A|ENSMUSG00000024120|ENSMUST00000161928|Transcript|intron_variant&non_coding_transcript_variant||||||||-1	37.5848
89	17	84781045	C|ENSMUSG00000024120|ENSMUST00000112308|Transcript|intron_variant||||||||-1;C|ENSMUSG00000024120|ENSMUST00000159222|Transcript|upstream_gene_variant|||||||3502|-1;C|ENSMUSG00000024120|ENSMUST00000161299|Transcript|intron_variant&non_coding_transcript_variant||||||||-1;C|ENSMUSG00000024120|ENSMUST00000161928|Transcript|intron_variant&non_coding_transcript_variant||||||||-1	37.5848
90	17	84781924	G|ENSMUSG00000024120|ENSMUST00000112308|Transcript|intron_variant||||||||-1;G|ENSMUSG00000024120|ENSMUST00000159222|Transcript|upstream_gene_variant|||||||4381|-1;G|ENSMUSG00000024120|ENSMUST00000161299|Transcript|intron_variant&non_coding_transcript_variant||||||||-1;G|ENSMUSG00000024120|ENSMUST00000161928|Transcript|intron_variant&non_coding_transcript_variant||||||||-1	37.5848
91	17	84781927	C|ENSMUSG00000024120|ENSMUST00000112308|Transcript|intron_variant||||||||-1;C|ENSMUSG00000024120|ENSMUST00000159222|Transcript|upstream_gene_variant|||||||4384|-1;C|ENSMUSG00000024120|ENSMUST00000161299|Transcript|intron_variant&non_coding_transcript_variant||||||||-1;C|ENSMUSG00000024120|ENSMUST00000161928|Transcript|intron_variant&non_coding_transcript_variant||||||||-1	37.5848
92	17	84782008	A|ENSMUSG00000024120|ENSMUST00000112308|Transcript|intron_variant||||||||-1;A|ENSMUSG00000024120|ENSMUST00000159222|Transcript|upstream_gene_variant|||||||4465|-1;A|ENSMUSG00000024120|ENSMUST00000161299|Transcript|intron_variant&non_coding_transcript_variant||||||||-1;A|ENSMUSG00000024120|ENSMUST00000161928|Transcript|intron_variant&non_coding_transcript_variant||||||||-1	37.5848
93	17	84782741	C|ENSMUSG00000024120|ENSMUST00000112308|Transcript|intron_variant||||||||-1;C|ENSMUSG00000024120|ENSMUST00000161299|Transcript|intron_variant&non_coding_transcript_variant||||||||-1;C|ENSMUSG00000024120|ENSMUST00000161928|Transcript|intron_variant&non_coding_transcript_variant||||||||-1	37.5848
94	17	84782958	G|ENSMUSG00000024120|ENSMUST00000112308|Transcript|intron_variant||||||||-1;G|ENSMUSG00000024120|ENSMUST00000161299|Transcript|intron_variant&non_coding_transcript_variant||||||||-1;G|ENSMUSG00000024120|ENSMUST00000161928|Transcript|intron_variant&non_coding_transcript_variant||||||||-1	37.5848
95	17	84783228	T|ENSMUSG00000024120|ENSMUST00000112308|Transcript|intron_variant||||||||-1;T|ENSMUSG00000024120|ENSMUST00000161299|Transcript|intron_variant&non_coding_transcript_variant||||||||-1;T|ENSMUSG00000024120|ENSMUST00000161928|Transcript|intron_variant&non_coding_transcript_variant||||||||-1	37.5848
96	17	84783780	G|ENSMUSG00000024120|ENSMUST00000112308|Transcript|intron_variant||||||||-1;G|ENSMUSG00000024120|ENSMUST00000161299|Transcript|intron_variant&non_coding_transcript_variant||||||||-1;G|ENSMUSG00000024120|ENSMUST00000161928|Transcript|intron_variant&non_coding_transcript_variant||||||||-1	37.5848
97	17	84785580	G|ENSMUSG00000024120|ENSMUST00000112308|Transcript|intron_variant||||||||-1;G|ENSMUSG00000024120|ENSMUST00000161299|Transcript|intron_variant&non_coding_transcript_variant||||||||-1;G|ENSMUSG00000024120|ENSMUST00000161928|Transcript|intron_variant&non_coding_transcript_variant||||||||-1	37.5848
98	17	84786830	C|ENSMUSG00000024120|ENSMUST00000112308|Transcript|intron_variant||||||||-1;C|ENSMUSG00000024120|ENSMUST00000161299|Transcript|intron_variant&non_coding_transcript_variant||||||||-1;C|ENSMUSG00000024120|ENSMUST00000161928|Transcript|intron_variant&non_coding_transcript_variant||||||||-1	37.5848
99	17	84787187	G|ENSMUSG00000024120|ENSMUST00000112308|Transcript|intron_variant||||||||-1;G|ENSMUSG00000024120|ENSMUST00000161299|Transcript|intron_variant&non_coding_transcript_variant||||||||-1;G|ENSMUSG00000024120|ENSMUST00000161928|Transcript|intron_variant&non_coding_transcript_variant||||||||-1	37.5848
100	17	84787754	T|ENSMUSG00000024120|ENSMUST00000112308|Transcript|intron_variant||||||||-1;T|ENSMUSG00000024120|ENSMUST00000161299|Transcript|intron_variant&non_coding_transcript_variant||||||||-1;T|ENSMUSG00000024120|ENSMUST00000161928|Transcript|intron_variant&non_coding_transcript_variant||||||||-1	37.5848
101	17	84789287	A|ENSMUSG00000024120|ENSMUST00000112308|Transcript|intron_variant||||||||-1;A|ENSMUSG00000024120|ENSMUST00000161299|Transcript|intron_variant&non_coding_transcript_variant||||||||-1;A|ENSMUSG00000024120|ENSMUST00000161928|Transcript|intron_variant&non_coding_transcript_variant||||||||-1	37.5848
102	17	84789333	G|ENSMUSG00000024120|ENSMUST00000112308|Transcript|intron_variant||||||||-1;G|ENSMUSG00000024120|ENSMUST00000161299|Transcript|intron_variant&non_coding_transcript_variant||||||||-1;G|ENSMUSG00000024120|ENSMUST00000161928|Transcript|intron_variant&non_coding_transcript_variant||||||||-1	37.5848
103	17	84789407	T|ENSMUSG00000024120|ENSMUST00000112308|Transcript|intron_variant||||||||-1;T|ENSMUSG00000024120|ENSMUST00000161299|Transcript|intron_variant&non_coding_transcript_variant||||||||-1;T|ENSMUSG00000024120|ENSMUST00000161928|Transcript|intron_variant&non_coding_transcript_variant||||||||-1	37.5848
104	17	84789408	G|ENSMUSG00000024120|ENSMUST00000112308|Transcript|intron_variant||||||||-1;G|ENSMUSG00000024120|ENSMUST00000161299|Transcript|intron_variant&non_coding_transcript_variant||||||||-1;G|ENSMUSG00000024120|ENSMUST00000161928|Transcript|intron_variant&non_coding_transcript_variant||||||||-1	37.5848
105	17	84938955	T||||intergenic_variant||||||||	34.6361
106	17	84790761	T|ENSMUSG00000024120|ENSMUST00000112308|Transcript|upstream_gene_variant|||||||203|-1;C|ENSMUSG00000024120|ENSMUST00000112308|Transcript|upstream_gene_variant|||||||203|-1;T|ENSMUSG00000024120|ENSMUST00000161299|Transcript|upstream_gene_variant|||||||199|-1;C|ENSMUSG00000024120|ENSMUST00000161299|Transcript|upstream_gene_variant|||||||199|-1;T|ENSMUSG00000024120|ENSMUST00000161928|Transcript|non_…	34.5848
107	17	84726578	A|ENSMUSG00000024120|ENSMUST00000162799|Transcript|non_coding_transcript_exon_variant&non_coding_transcript_variant|135|||||||-1;A|ENSMUSG00000024120|ENSMUST00000160011|Transcript|downstream_gene_variant|||||||4602|-1;A|ENSMUSG00000024120|ENSMUST00000112308|Transcript|synonymous_variant|3033|2988|996|A|gcC/gcT|||-1	34.5533
108	17	84759893	C|ENSMUSG00000024120|ENSMUST00000112308|Transcript|intron_variant||||||||-1	34.5533
109	17	84782266	G|ENSMUSG00000024120|ENSMUST00000112308|Transcript|intron_variant||||||||-1;G|ENSMUSG00000024120|ENSMUST00000159222|Transcript|upstream_gene_variant|||||||4723|-1;G|ENSMUSG00000024120|ENSMUST00000161299|Transcript|intron_variant&non_coding_transcript_variant||||||||-1;G|ENSMUSG00000024120|ENSMUST00000161928|Transcript|intron_variant&non_coding_transcript_variant||||||||-1	34.5533
110	17	84782555	A|ENSMUSG00000024120|ENSMUST00000112308|Transcript|intron_variant||||||||-1;A|ENSMUSG00000024120|ENSMUST00000161299|Transcript|intron_variant&non_coding_transcript_variant||||||||-1;A|ENSMUSG00000024120|ENSMUST00000161928|Transcript|intron_variant&non_coding_transcript_variant||||||||-1	34.5533
111	17	84783215	T|ENSMUSG00000024120|ENSMUST00000112308|Transcript|intron_variant||||||||-1;T|ENSMUSG00000024120|ENSMUST00000161299|Transcript|intron_variant&non_coding_transcript_variant||||||||-1;T|ENSMUSG00000024120|ENSMUST00000161928|Transcript|intron_variant&non_coding_transcript_variant||||||||-1	34.5533
112	17	84783825	G|ENSMUSG00000024120|ENSMUST00000112308|Transcript|intron_variant||||||||-1;G|ENSMUSG00000024120|ENSMUST00000161299|Transcript|intron_variant&non_coding_transcript_variant||||||||-1;G|ENSMUSG00000024120|ENSMUST00000161928|Transcript|intron_variant&non_coding_transcript_variant||||||||-1	34.5533
113	17	84784842	T|ENSMUSG00000024120|ENSMUST00000112308|Transcript|intron_variant||||||||-1;T|ENSMUSG00000024120|ENSMUST00000161299|Transcript|intron_variant&non_coding_transcript_variant||||||||-1;T|ENSMUSG00000024120|ENSMUST00000161928|Transcript|intron_variant&non_coding_transcript_variant||||||||-1	34.5533
114	17	84784900	T|ENSMUSG00000024120|ENSMUST00000112308|Transcript|intron_variant||||||||-1;T|ENSMUSG00000024120|ENSMUST00000161299|Transcript|intron_variant&non_coding_transcript_variant||||||||-1;T|ENSMUSG00000024120|ENSMUST00000161928|Transcript|intron_variant&non_coding_transcript_variant||||||||-1	34.5533
115	17	84785108	G|ENSMUSG00000024120|ENSMUST00000112308|Transcript|intron_variant||||||||-1;G|ENSMUSG00000024120|ENSMUST00000161299|Transcript|intron_variant&non_coding_transcript_variant||||||||-1;G|ENSMUSG00000024120|ENSMUST00000161928|Transcript|intron_variant&non_coding_transcript_variant||||||||-1	34.5533
116	17	84785144	A|ENSMUSG00000024120|ENSMUST00000112308|Transcript|intron_variant||||||||-1;A|ENSMUSG00000024120|ENSMUST00000161299|Transcript|intron_variant&non_coding_transcript_variant||||||||-1;A|ENSMUSG00000024120|ENSMUST00000161928|Transcript|intron_variant&non_coding_transcript_variant||||||||-1	34.5533
117	17	84785151	T|ENSMUSG00000024120|ENSMUST00000112308|Transcript|intron_variant||||||||-1;T|ENSMUSG00000024120|ENSMUST00000161299|Transcript|intron_variant&non_coding_transcript_variant||||||||-1;T|ENSMUSG00000024120|ENSMUST00000161928|Transcript|intron_variant&non_coding_transcript_variant||||||||-1	34.5533
118	17	84785738	T|ENSMUSG00000024120|ENSMUST00000112308|Transcript|intron_variant||||||||-1;T|ENSMUSG00000024120|ENSMUST00000161299|Transcript|intron_variant&non_coding_transcript_variant||||||||-1;T|ENSMUSG00000024120|ENSMUST00000161928|Transcript|intron_variant&non_coding_transcript_variant||||||||-1	34.5533
119	17	84785844	A|ENSMUSG00000024120|ENSMUST00000112308|Transcript|intron_variant||||||||-1;A|ENSMUSG00000024120|ENSMUST00000161299|Transcript|intron_variant&non_coding_transcript_variant||||||||-1;A|ENSMUSG00000024120|ENSMUST00000161928|Transcript|intron_variant&non_coding_transcript_variant||||||||-1	34.5533
120	17	84785967	A|ENSMUSG00000024120|ENSMUST00000112308|Transcript|intron_variant||||||||-1;A|ENSMUSG00000024120|ENSMUST00000161299|Transcript|intron_variant&non_coding_transcript_variant||||||||-1;A|ENSMUSG00000024120|ENSMUST00000161928|Transcript|intron_variant&non_coding_transcript_variant||||||||-1	34.5533
121	17	84786368	T|ENSMUSG00000024120|ENSMUST00000112308|Transcript|intron_variant||||||||-1;T|ENSMUSG00000024120|ENSMUST00000161299|Transcript|intron_variant&non_coding_transcript_variant||||||||-1;T|ENSMUSG00000024120|ENSMUST00000161928|Transcript|intron_variant&non_coding_transcript_variant||||||||-1	34.5533
122	17	84790015	C|ENSMUSG00000024120|ENSMUST00000112308|Transcript|intron_variant||||||||-1;C|ENSMUSG00000024120|ENSMUST00000161299|Transcript|intron_variant&non_coding_transcript_variant||||||||-1;C|ENSMUSG00000024120|ENSMUST00000161928|Transcript|intron_variant&non_coding_transcript_variant||||||||-1	34.3672
123	17	84790036	T|ENSMUSG00000024120|ENSMUST00000112308|Transcript|intron_variant||||||||-1;T|ENSMUSG00000024120|ENSMUST00000161299|Transcript|intron_variant&non_coding_transcript_variant||||||||-1;T|ENSMUSG00000024120|ENSMUST00000161928|Transcript|intron_variant&non_coding_transcript_variant||||||||-1	34.3672
124	17	84790403	A|ENSMUSG00000024120|ENSMUST00000112308|Transcript|synonymous_variant|156|111|37|V|gtC/gtT|||-1;A|ENSMUSG00000024120|ENSMUST00000161299|Transcript|non_coding_transcript_exon_variant&non_coding_transcript_variant|160|||||||-1;A|ENSMUSG00000024120|ENSMUST00000161928|Transcript|non_coding_transcript_exon_variant&non_coding_transcript_variant|387|||||||-1	34.3672
125	17	84790483	A|ENSMUSG00000024120|ENSMUST00000112308|Transcript|synonymous_variant|76|31|11|L|Ctg/Ttg|||-1;A|ENSMUSG00000024120|ENSMUST00000161299|Transcript|non_coding_transcript_exon_variant&non_coding_transcript_variant|80|||||||-1;A|ENSMUSG00000024120|ENSMUST00000161928|Transcript|non_coding_transcript_exon_variant&non_coding_transcript_variant|307|||||||-1	34.3672
126	17	84790767	G|ENSMUSG00000024120|ENSMUST00000112308|Transcript|upstream_gene_variant|||||||209|-1;G|ENSMUSG00000024120|ENSMUST00000161299|Transcript|upstream_gene_variant|||||||205|-1;G|ENSMUSG00000024120|ENSMUST00000161928|Transcript|non_coding_transcript_exon_variant&non_coding_transcript_variant|23|||||||-1	34.3672
127	17	84790787	A|ENSMUSG00000024120|ENSMUST00000112308|Transcript|upstream_gene_variant|||||||229|-1;A|ENSMUSG00000024120|ENSMUST00000161299|Transcript|upstream_gene_variant|||||||225|-1;A|ENSMUSG00000024120|ENSMUST00000161928|Transcript|non_coding_transcript_exon_variant&non_coding_transcript_variant|3|||||||-1	34.3672
128	17	84805983	A||||intergenic_variant||||||||	34.3672
129	17	84505914	C||||intergenic_variant||||||||	34.3266
130	17	84714016	T|ENSMUSG00000024120|ENSMUST00000162799|Transcript|intron_variant&non_coding_transcript_variant||||||||-1;T|ENSMUSG00000024120|ENSMUST00000112308|Transcript|intron_variant||||||||-1	34.3218
131	17	84734514	T|ENSMUSG00000024120|ENSMUST00000162799|Transcript|upstream_gene_variant|||||||3330|-1;T|ENSMUSG00000024120|ENSMUST00000160011|Transcript|intron_variant&NMD_transcript_variant||||||||-1;T|ENSMUSG00000024120|ENSMUST00000112308|Transcript|intron_variant||||||||-1	34.3218
132	17	84734844	T|ENSMUSG00000024120|ENSMUST00000162799|Transcript|upstream_gene_variant|||||||3660|-1;T|ENSMUSG00000024120|ENSMUST00000160011|Transcript|intron_variant&NMD_transcript_variant||||||||-1;T|ENSMUSG00000024120|ENSMUST00000112308|Transcript|intron_variant||||||||-1	34.3218
133	17	84735738	A|ENSMUSG00000024120|ENSMUST00000162799|Transcript|upstream_gene_variant|||||||4554|-1;A|ENSMUSG00000024120|ENSMUST00000160011|Transcript|intron_variant&NMD_transcript_variant||||||||-1;A|ENSMUSG00000024120|ENSMUST00000112308|Transcript|intron_variant||||||||-1	34.3218
134	17	84738820	A|ENSMUSG00000024120|ENSMUST00000160011|Transcript|intron_variant&NMD_transcript_variant||||||||-1;A|ENSMUSG00000024120|ENSMUST00000112308|Transcript|intron_variant||||||||-1	34.3218
135	17	84739379	T|ENSMUSG00000024120|ENSMUST00000160011|Transcript|intron_variant&NMD_transcript_variant||||||||-1;T|ENSMUSG00000024120|ENSMUST00000112308|Transcript|intron_variant||||||||-1	34.3218
136	17	84743083	T|ENSMUSG00000024120|ENSMUST00000160011|Transcript|intron_variant&NMD_transcript_variant||||||||-1;T|ENSMUSG00000024120|ENSMUST00000112308|Transcript|intron_variant||||||||-1	34.3218
137	17	84743228	T|ENSMUSG00000024120|ENSMUST00000160011|Transcript|intron_variant&NMD_transcript_variant||||||||-1;T|ENSMUSG00000024120|ENSMUST00000112308|Transcript|intron_variant||||||||-1	34.3218
138	17	84743873	A|ENSMUSG00000024120|ENSMUST00000160011|Transcript|intron_variant&NMD_transcript_variant||||||||-1;A|ENSMUSG00000024120|ENSMUST00000160414|Transcript|downstream_gene_variant|||||||4908|-1;A|ENSMUSG00000024120|ENSMUST00000112308|Transcript|intron_variant||||||||-1	34.3218
139	17	84755760	A|ENSMUSG00000024120|ENSMUST00000160011|Transcript|upstream_gene_variant|||||||4498|-1;A|ENSMUSG00000024120|ENSMUST00000160414|Transcript|upstream_gene_variant|||||||4498|-1;A|ENSMUSG00000024120|ENSMUST00000112308|Transcript|intron_variant||||||||-1	34.3218
140	17	84756711	T|ENSMUSG00000024120|ENSMUST00000112308|Transcript|intron_variant||||||||-1	34.3218
141	17	84757901	T|ENSMUSG00000024120|ENSMUST00000112308|Transcript|intron_variant||||||||-1	34.3218
142	17	84757905	C|ENSMUSG00000024120|ENSMUST00000112308|Transcript|intron_variant||||||||-1	34.3218
143	17	84759401	T|ENSMUSG00000024120|ENSMUST00000112308|Transcript|intron_variant||||||||-1	34.3218
144	17	84760074	G|ENSMUSG00000024120|ENSMUST00000112308|Transcript|intron_variant||||||||-1	34.3218
145	17	84761915	A|ENSMUSG00000024120|ENSMUST00000112308|Transcript|intron_variant||||||||-1;A|ENSMUSG00000024120|ENSMUST00000161928|Transcript|downstream_gene_variant|||||||4513|-1	34.3218
146	17	84763907	A|ENSMUSG00000024120|ENSMUST00000112308|Transcript|intron_variant||||||||-1;A|ENSMUSG00000024120|ENSMUST00000161299|Transcript|downstream_gene_variant|||||||3682|-1;A|ENSMUSG00000024120|ENSMUST00000161928|Transcript|downstream_gene_variant|||||||2521|-1	34.3218
147	17	84767949	T|ENSMUSG00000024120|ENSMUST00000112308|Transcript|intron_variant||||||||-1;T|ENSMUSG00000024120|ENSMUST00000159222|Transcript|downstream_gene_variant|||||||2488|-1;T|ENSMUSG00000024120|ENSMUST00000161299|Transcript|non_coding_transcript_exon_variant&non_coding_transcript_variant|3652|||||||-1;T|ENSMUSG00000024120|ENSMUST00000161928|Transcript|intron_variant&non_coding_transcript_variant||||||||-1	34.3218
148	17	84768652	A|ENSMUSG00000024120|ENSMUST00000112308|Transcript|intron_variant||||||||-1;A|ENSMUSG00000024120|ENSMUST00000159222|Transcript|downstream_gene_variant|||||||1785|-1;A|ENSMUSG00000024120|ENSMUST00000161299|Transcript|non_coding_transcript_exon_variant&non_coding_transcript_variant|2949|||||||-1;A|ENSMUSG00000024120|ENSMUST00000161928|Transcript|intron_variant&non_coding_transcript_variant||||||||-1	34.3218
149	17	84770411	A|ENSMUSG00000024120|ENSMUST00000112308|Transcript|synonymous_variant|1140|1095|365|D|gaC/gaT|||-1;A|ENSMUSG00000024120|ENSMUST00000159222|Transcript|downstream_gene_variant|||||||26|-1;A|ENSMUSG00000024120|ENSMUST00000161299|Transcript|non_coding_transcript_exon_variant&non_coding_transcript_variant|1487|||||||-1;A|ENSMUSG00000024120|ENSMUST00000161928|Transcript|non_coding_transcript_exon_varia…	34.3218
150	17	84772116	A|ENSMUSG00000024120|ENSMUST00000112308|Transcript|synonymous_variant|756|711|237|L|ctC/ctT|||-1;A|ENSMUSG00000024120|ENSMUST00000159222|Transcript|non_coding_transcript_exon_variant&non_coding_transcript_variant|609|||||||-1;A|ENSMUSG00000024120|ENSMUST00000161299|Transcript|non_coding_transcript_exon_variant&non_coding_transcript_variant|760|||||||-1;A|ENSMUSG00000024120|ENSMUST00000161928|Tran…	34.3218
151	17	84772674	C|ENSMUSG00000024120|ENSMUST00000112308|Transcript|intron_variant||||||||-1;C|ENSMUSG00000024120|ENSMUST00000159222|Transcript|intron_variant&non_coding_transcript_variant||||||||-1;C|ENSMUSG00000024120|ENSMUST00000161299|Transcript|intron_variant&non_coding_transcript_variant||||||||-1;C|ENSMUSG00000024120|ENSMUST00000161928|Transcript|intron_variant&non_coding_transcript_variant||||||||-1	34.3218
152	17	84772679	T|ENSMUSG00000024120|ENSMUST00000112308|Transcript|intron_variant||||||||-1;T|ENSMUSG00000024120|ENSMUST00000159222|Transcript|intron_variant&non_coding_transcript_variant||||||||-1;T|ENSMUSG00000024120|ENSMUST00000161299|Transcript|intron_variant&non_coding_transcript_variant||||||||-1;T|ENSMUSG00000024120|ENSMUST00000161928|Transcript|intron_variant&non_coding_transcript_variant||||||||-1	34.3218
153	17	84773603	C|ENSMUSG00000024120|ENSMUST00000112308|Transcript|intron_variant||||||||-1;C|ENSMUSG00000024120|ENSMUST00000159222|Transcript|intron_variant&non_coding_transcript_variant||||||||-1;C|ENSMUSG00000024120|ENSMUST00000161299|Transcript|intron_variant&non_coding_transcript_variant||||||||-1;C|ENSMUSG00000024120|ENSMUST00000161928|Transcript|intron_variant&non_coding_transcript_variant||||||||-1	34.3218
154	17	84776066	G|ENSMUSG00000024120|ENSMUST00000112308|Transcript|intron_variant||||||||-1;G|ENSMUSG00000024120|ENSMUST00000159222|Transcript|intron_variant&non_coding_transcript_variant||||||||-1;G|ENSMUSG00000024120|ENSMUST00000161299|Transcript|intron_variant&non_coding_transcript_variant||||||||-1;G|ENSMUSG00000024120|ENSMUST00000161928|Transcript|intron_variant&non_coding_transcript_variant||||||||-1	34.3218
155	17	84776414	T|ENSMUSG00000024120|ENSMUST00000112308|Transcript|intron_variant||||||||-1;T|ENSMUSG00000024120|ENSMUST00000159222|Transcript|intron_variant&non_coding_transcript_variant||||||||-1;T|ENSMUSG00000024120|ENSMUST00000161299|Transcript|intron_variant&non_coding_transcript_variant||||||||-1;T|ENSMUSG00000024120|ENSMUST00000161928|Transcript|intron_variant&non_coding_transcript_variant||||||||-1	34.3218
156	17	84777084	A|ENSMUSG00000024120|ENSMUST00000112308|Transcript|missense_variant|245|200|67|D/V|gAt/gTt|||-1;A|ENSMUSG00000024120|ENSMUST00000159222|Transcript|non_coding_transcript_exon_variant&non_coding_transcript_variant|98|||||||-1;A|ENSMUSG00000024120|ENSMUST00000161299|Transcript|non_coding_transcript_exon_variant&non_coding_transcript_variant|249|||||||-1;A|ENSMUSG00000024120|ENSMUST00000161928|Transc…	34.3218
157	17	84777129	A|ENSMUSG00000024120|ENSMUST00000112308|Transcript|missense_variant|200|155|52|R/L|cGt/cTt|||-1;A|ENSMUSG00000024120|ENSMUST00000159222|Transcript|non_coding_transcript_exon_variant&non_coding_transcript_variant|53|||||||-1;A|ENSMUSG00000024120|ENSMUST00000161299|Transcript|non_coding_transcript_exon_variant&non_coding_transcript_variant|204|||||||-1;A|ENSMUSG00000024120|ENSMUST00000161928|Transc…	34.3218
158	17	84777586	A|ENSMUSG00000024120|ENSMUST00000112308|Transcript|intron_variant||||||||-1;A|ENSMUSG00000024120|ENSMUST00000159222|Transcript|upstream_gene_variant|||||||43|-1;A|ENSMUSG00000024120|ENSMUST00000161299|Transcript|intron_variant&non_coding_transcript_variant||||||||-1;A|ENSMUSG00000024120|ENSMUST00000161928|Transcript|intron_variant&non_coding_transcript_variant||||||||-1	34.3218
159	17	84777658	T|ENSMUSG00000024120|ENSMUST00000112308|Transcript|intron_variant||||||||-1;T|ENSMUSG00000024120|ENSMUST00000159222|Transcript|upstream_gene_variant|||||||115|-1;T|ENSMUSG00000024120|ENSMUST00000161299|Transcript|intron_variant&non_coding_transcript_variant||||||||-1;T|ENSMUSG00000024120|ENSMUST00000161928|Transcript|intron_variant&non_coding_transcript_variant||||||||-1	34.3218
160	17	84777689	C|ENSMUSG00000024120|ENSMUST00000112308|Transcript|intron_variant||||||||-1;C|ENSMUSG00000024120|ENSMUST00000159222|Transcript|upstream_gene_variant|||||||146|-1;C|ENSMUSG00000024120|ENSMUST00000161299|Transcript|intron_variant&non_coding_transcript_variant||||||||-1;C|ENSMUSG00000024120|ENSMUST00000161928|Transcript|intron_variant&non_coding_transcript_variant||||||||-1	34.3218
161	17	84777722	G|ENSMUSG00000024120|ENSMUST00000112308|Transcript|intron_variant||||||||-1;G|ENSMUSG00000024120|ENSMUST00000159222|Transcript|upstream_gene_variant|||||||179|-1;G|ENSMUSG00000024120|ENSMUST00000161299|Transcript|intron_variant&non_coding_transcript_variant||||||||-1;G|ENSMUSG00000024120|ENSMUST00000161928|Transcript|intron_variant&non_coding_transcript_variant||||||||-1	34.3218
162	17	84777895	C|ENSMUSG00000024120|ENSMUST00000112308|Transcript|intron_variant||||||||-1;G|ENSMUSG00000024120|ENSMUST00000112308|Transcript|intron_variant||||||||-1;C|ENSMUSG00000024120|ENSMUST00000159222|Transcript|upstream_gene_variant|||||||352|-1;G|ENSMUSG00000024120|ENSMUST00000159222|Transcript|upstream_gene_variant|||||||352|-1;C|ENSMUSG00000024120|ENSMUST00000161299|Transcript|intron_variant&non_codin…	34.3218
163	17	84778105	C|ENSMUSG00000024120|ENSMUST00000112308|Transcript|intron_variant||||||||-1;C|ENSMUSG00000024120|ENSMUST00000159222|Transcript|upstream_gene_variant|||||||562|-1;C|ENSMUSG00000024120|ENSMUST00000161299|Transcript|intron_variant&non_coding_transcript_variant||||||||-1;C|ENSMUSG00000024120|ENSMUST00000161928|Transcript|intron_variant&non_coding_transcript_variant||||||||-1	34.3218
164	17	84778519	G|ENSMUSG00000024120|ENSMUST00000112308|Transcript|intron_variant||||||||-1;G|ENSMUSG00000024120|ENSMUST00000159222|Transcript|upstream_gene_variant|||||||976|-1;G|ENSMUSG00000024120|ENSMUST00000161299|Transcript|intron_variant&non_coding_transcript_variant||||||||-1;G|ENSMUSG00000024120|ENSMUST00000161928|Transcript|intron_variant&non_coding_transcript_variant||||||||-1	34.3218
165	17	84778658	A|ENSMUSG00000024120|ENSMUST00000112308|Transcript|intron_variant||||||||-1;A|ENSMUSG00000024120|ENSMUST00000159222|Transcript|upstream_gene_variant|||||||1115|-1;A|ENSMUSG00000024120|ENSMUST00000161299|Transcript|intron_variant&non_coding_transcript_variant||||||||-1;A|ENSMUSG00000024120|ENSMUST00000161928|Transcript|intron_variant&non_coding_transcript_variant||||||||-1	34.3218
166	17	84778919	T|ENSMUSG00000024120|ENSMUST00000112308|Transcript|intron_variant||||||||-1;T|ENSMUSG00000024120|ENSMUST00000159222|Transcript|upstream_gene_variant|||||||1376|-1;T|ENSMUSG00000024120|ENSMUST00000161299|Transcript|intron_variant&non_coding_transcript_variant||||||||-1;T|ENSMUSG00000024120|ENSMUST00000161928|Transcript|intron_variant&non_coding_transcript_variant||||||||-1	34.3218
167	17	84779643	C|ENSMUSG00000024120|ENSMUST00000112308|Transcript|intron_variant||||||||-1;C|ENSMUSG00000024120|ENSMUST00000159222|Transcript|upstream_gene_variant|||||||2100|-1;C|ENSMUSG00000024120|ENSMUST00000161299|Transcript|intron_variant&non_coding_transcript_variant||||||||-1;C|ENSMUSG00000024120|ENSMUST00000161928|Transcript|intron_variant&non_coding_transcript_variant||||||||-1	34.3218
168	17	84779993	T|ENSMUSG00000024120|ENSMUST00000112308|Transcript|intron_variant||||||||-1;T|ENSMUSG00000024120|ENSMUST00000159222|Transcript|upstream_gene_variant|||||||2450|-1;T|ENSMUSG00000024120|ENSMUST00000161299|Transcript|intron_variant&non_coding_transcript_variant||||||||-1;T|ENSMUSG00000024120|ENSMUST00000161928|Transcript|intron_variant&non_coding_transcript_variant||||||||-1	34.3218
169	17	84780691	A|ENSMUSG00000024120|ENSMUST00000112308|Transcript|intron_variant||||||||-1;A|ENSMUSG00000024120|ENSMUST00000159222|Transcript|upstream_gene_variant|||||||3148|-1;A|ENSMUSG00000024120|ENSMUST00000161299|Transcript|intron_variant&non_coding_transcript_variant||||||||-1;A|ENSMUSG00000024120|ENSMUST00000161928|Transcript|intron_variant&non_coding_transcript_variant||||||||-1	34.3218
170	17	84780846	C|ENSMUSG00000024120|ENSMUST00000112308|Transcript|intron_variant||||||||-1;C|ENSMUSG00000024120|ENSMUST00000159222|Transcript|upstream_gene_variant|||||||3303|-1;C|ENSMUSG00000024120|ENSMUST00000161299|Transcript|intron_variant&non_coding_transcript_variant||||||||-1;C|ENSMUSG00000024120|ENSMUST00000161928|Transcript|intron_variant&non_coding_transcript_variant||||||||-1	34.3218
171	17	84781319	T|ENSMUSG00000024120|ENSMUST00000112308|Transcript|intron_variant||||||||-1;T|ENSMUSG00000024120|ENSMUST00000159222|Transcript|upstream_gene_variant|||||||3776|-1;T|ENSMUSG00000024120|ENSMUST00000161299|Transcript|intron_variant&non_coding_transcript_variant||||||||-1;T|ENSMUSG00000024120|ENSMUST00000161928|Transcript|intron_variant&non_coding_transcript_variant||||||||-1	34.3218
172	17	84781617	C|ENSMUSG00000024120|ENSMUST00000112308|Transcript|intron_variant||||||||-1;C|ENSMUSG00000024120|ENSMUST00000159222|Transcript|upstream_gene_variant|||||||4074|-1;C|ENSMUSG00000024120|ENSMUST00000161299|Transcript|intron_variant&non_coding_transcript_variant||||||||-1;C|ENSMUSG00000024120|ENSMUST00000161928|Transcript|intron_variant&non_coding_transcript_variant||||||||-1	34.3218
173	17	84781644	A|ENSMUSG00000024120|ENSMUST00000112308|Transcript|intron_variant||||||||-1;A|ENSMUSG00000024120|ENSMUST00000159222|Transcript|upstream_gene_variant|||||||4101|-1;A|ENSMUSG00000024120|ENSMUST00000161299|Transcript|intron_variant&non_coding_transcript_variant||||||||-1;A|ENSMUSG00000024120|ENSMUST00000161928|Transcript|intron_variant&non_coding_transcript_variant||||||||-1	34.3218
174	17	84781720	C|ENSMUSG00000024120|ENSMUST00000112308|Transcript|intron_variant||||||||-1;C|ENSMUSG00000024120|ENSMUST00000159222|Transcript|upstream_gene_variant|||||||4177|-1;C|ENSMUSG00000024120|ENSMUST00000161299|Transcript|intron_variant&non_coding_transcript_variant||||||||-1;C|ENSMUSG00000024120|ENSMUST00000161928|Transcript|intron_variant&non_coding_transcript_variant||||||||-1	34.3218
175	17	84781852	G|ENSMUSG00000024120|ENSMUST00000112308|Transcript|intron_variant||||||||-1;G|ENSMUSG00000024120|ENSMUST00000159222|Transcript|upstream_gene_variant|||||||4309|-1;G|ENSMUSG00000024120|ENSMUST00000161299|Transcript|intron_variant&non_coding_transcript_variant||||||||-1;G|ENSMUSG00000024120|ENSMUST00000161928|Transcript|intron_variant&non_coding_transcript_variant||||||||-1	34.3218
176	17	84782451	T|ENSMUSG00000024120|ENSMUST00000112308|Transcript|intron_variant||||||||-1;T|ENSMUSG00000024120|ENSMUST00000159222|Transcript|upstream_gene_variant|||||||4908|-1;T|ENSMUSG00000024120|ENSMUST00000161299|Transcript|intron_variant&non_coding_transcript_variant||||||||-1;T|ENSMUSG00000024120|ENSMUST00000161928|Transcript|intron_variant&non_coding_transcript_variant||||||||-1	34.3218
177	17	84782544	A|ENSMUSG00000024120|ENSMUST00000112308|Transcript|intron_variant||||||||-1;A|ENSMUSG00000024120|ENSMUST00000161299|Transcript|intron_variant&non_coding_transcript_variant||||||||-1;A|ENSMUSG00000024120|ENSMUST00000161928|Transcript|intron_variant&non_coding_transcript_variant||||||||-1	34.3218
178	17	84782649	A|ENSMUSG00000024120|ENSMUST00000112308|Transcript|intron_variant||||||||-1;A|ENSMUSG00000024120|ENSMUST00000161299|Transcript|intron_variant&non_coding_transcript_variant||||||||-1;A|ENSMUSG00000024120|ENSMUST00000161928|Transcript|intron_variant&non_coding_transcript_variant||||||||-1	34.3218
179	17	84782861	T|ENSMUSG00000024120|ENSMUST00000112308|Transcript|intron_variant||||||||-1;T|ENSMUSG00000024120|ENSMUST00000161299|Transcript|intron_variant&non_coding_transcript_variant||||||||-1;T|ENSMUSG00000024120|ENSMUST00000161928|Transcript|intron_variant&non_coding_transcript_variant||||||||-1	34.3218
180	17	84782976	A|ENSMUSG00000024120|ENSMUST00000112308|Transcript|intron_variant||||||||-1;A|ENSMUSG00000024120|ENSMUST00000161299|Transcript|intron_variant&non_coding_transcript_variant||||||||-1;A|ENSMUSG00000024120|ENSMUST00000161928|Transcript|intron_variant&non_coding_transcript_variant||||||||-1	34.3218
181	17	84784021	T|ENSMUSG00000024120|ENSMUST00000112308|Transcript|intron_variant||||||||-1;T|ENSMUSG00000024120|ENSMUST00000161299|Transcript|intron_variant&non_coding_transcript_variant||||||||-1;T|ENSMUSG00000024120|ENSMUST00000161928|Transcript|intron_variant&non_coding_transcript_variant||||||||-1	34.3218
182	17	84784088	T|ENSMUSG00000024120|ENSMUST00000112308|Transcript|intron_variant||||||||-1;T|ENSMUSG00000024120|ENSMUST00000161299|Transcript|intron_variant&non_coding_transcript_variant||||||||-1;T|ENSMUSG00000024120|ENSMUST00000161928|Transcript|intron_variant&non_coding_transcript_variant||||||||-1	34.3218
183	17	84784089	T|ENSMUSG00000024120|ENSMUST00000112308|Transcript|intron_variant||||||||-1;T|ENSMUSG00000024120|ENSMUST00000161299|Transcript|intron_variant&non_coding_transcript_variant||||||||-1;T|ENSMUSG00000024120|ENSMUST00000161928|Transcript|intron_variant&non_coding_transcript_variant||||||||-1	34.3218
184	17	84784113	A|ENSMUSG00000024120|ENSMUST00000112308|Transcript|intron_variant||||||||-1;A|ENSMUSG00000024120|ENSMUST00000161299|Transcript|intron_variant&non_coding_transcript_variant||||||||-1;A|ENSMUSG00000024120|ENSMUST00000161928|Transcript|intron_variant&non_coding_transcript_variant||||||||-1	34.3218
185	17	84784332	A|ENSMUSG00000024120|ENSMUST00000112308|Transcript|intron_variant||||||||-1;A|ENSMUSG00000024120|ENSMUST00000161299|Transcript|intron_variant&non_coding_transcript_variant||||||||-1;A|ENSMUSG00000024120|ENSMUST00000161928|Transcript|intron_variant&non_coding_transcript_variant||||||||-1	34.3218
186	17	84784631	C|ENSMUSG00000024120|ENSMUST00000112308|Transcript|intron_variant||||||||-1;C|ENSMUSG00000024120|ENSMUST00000161299|Transcript|intron_variant&non_coding_transcript_variant||||||||-1;C|ENSMUSG00000024120|ENSMUST00000161928|Transcript|intron_variant&non_coding_transcript_variant||||||||-1	34.3218
187	17	84784633	A|ENSMUSG00000024120|ENSMUST00000112308|Transcript|intron_variant||||||||-1;A|ENSMUSG00000024120|ENSMUST00000161299|Transcript|intron_variant&non_coding_transcript_variant||||||||-1;A|ENSMUSG00000024120|ENSMUST00000161928|Transcript|intron_variant&non_coding_transcript_variant||||||||-1	34.3218
188	17	84784639	C|ENSMUSG00000024120|ENSMUST00000112308|Transcript|intron_variant||||||||-1;C|ENSMUSG00000024120|ENSMUST00000161299|Transcript|intron_variant&non_coding_transcript_variant||||||||-1;C|ENSMUSG00000024120|ENSMUST00000161928|Transcript|intron_variant&non_coding_transcript_variant||||||||-1	34.3218
189	17	84784735	C|ENSMUSG00000024120|ENSMUST00000112308|Transcript|intron_variant||||||||-1;C|ENSMUSG00000024120|ENSMUST00000161299|Transcript|intron_variant&non_coding_transcript_variant||||||||-1;C|ENSMUSG00000024120|ENSMUST00000161928|Transcript|intron_variant&non_coding_transcript_variant||||||||-1	34.3218
190	17	84784896	C|ENSMUSG00000024120|ENSMUST00000112308|Transcript|intron_variant||||||||-1;C|ENSMUSG00000024120|ENSMUST00000161299|Transcript|intron_variant&non_coding_transcript_variant||||||||-1;C|ENSMUSG00000024120|ENSMUST00000161928|Transcript|intron_variant&non_coding_transcript_variant||||||||-1	34.3218
191	17	84784923	A|ENSMUSG00000024120|ENSMUST00000112308|Transcript|intron_variant||||||||-1;A|ENSMUSG00000024120|ENSMUST00000161299|Transcript|intron_variant&non_coding_transcript_variant||||||||-1;A|ENSMUSG00000024120|ENSMUST00000161928|Transcript|intron_variant&non_coding_transcript_variant||||||||-1	34.3218
192	17	84785434	C|ENSMUSG00000024120|ENSMUST00000112308|Transcript|intron_variant||||||||-1;C|ENSMUSG00000024120|ENSMUST00000161299|Transcript|intron_variant&non_coding_transcript_variant||||||||-1;C|ENSMUSG00000024120|ENSMUST00000161928|Transcript|intron_variant&non_coding_transcript_variant||||||||-1	34.3218
193	17	84785438	G|ENSMUSG00000024120|ENSMUST00000112308|Transcript|intron_variant||||||||-1;G|ENSMUSG00000024120|ENSMUST00000161299|Transcript|intron_variant&non_coding_transcript_variant||||||||-1;G|ENSMUSG00000024120|ENSMUST00000161928|Transcript|intron_variant&non_coding_transcript_variant||||||||-1	34.3218
194	17	84785442	A|ENSMUSG00000024120|ENSMUST00000112308|Transcript|intron_variant||||||||-1;A|ENSMUSG00000024120|ENSMUST00000161299|Transcript|intron_variant&non_coding_transcript_variant||||||||-1;A|ENSMUSG00000024120|ENSMUST00000161928|Transcript|intron_variant&non_coding_transcript_variant||||||||-1	34.3218
195	17	84785657	T|ENSMUSG00000024120|ENSMUST00000112308|Transcript|intron_variant||||||||-1;T|ENSMUSG00000024120|ENSMUST00000161299|Transcript|intron_variant&non_coding_transcript_variant||||||||-1;T|ENSMUSG00000024120|ENSMUST00000161928|Transcript|intron_variant&non_coding_transcript_variant||||||||-1	34.3218
196	17	84785804	A|ENSMUSG00000024120|ENSMUST00000112308|Transcript|intron_variant||||||||-1;A|ENSMUSG00000024120|ENSMUST00000161299|Transcript|intron_variant&non_coding_transcript_variant||||||||-1;A|ENSMUSG00000024120|ENSMUST00000161928|Transcript|intron_variant&non_coding_transcript_variant||||||||-1	34.3218
197	17	84785816	C|ENSMUSG00000024120|ENSMUST00000112308|Transcript|intron_variant||||||||-1;C|ENSMUSG00000024120|ENSMUST00000161299|Transcript|intron_variant&non_coding_transcript_variant||||||||-1;C|ENSMUSG00000024120|ENSMUST00000161928|Transcript|intron_variant&non_coding_transcript_variant||||||||-1	34.3218
198	17	84785989	G|ENSMUSG00000024120|ENSMUST00000112308|Transcript|intron_variant||||||||-1;G|ENSMUSG00000024120|ENSMUST00000161299|Transcript|intron_variant&non_coding_transcript_variant||||||||-1;G|ENSMUSG00000024120|ENSMUST00000161928|Transcript|intron_variant&non_coding_transcript_variant||||||||-1	34.3218
199	17	84786005	G|ENSMUSG00000024120|ENSMUST00000112308|Transcript|intron_variant||||||||-1;G|ENSMUSG00000024120|ENSMUST00000161299|Transcript|intron_variant&non_coding_transcript_variant||||||||-1;G|ENSMUSG00000024120|ENSMUST00000161928|Transcript|intron_variant&non_coding_transcript_variant||||||||-1	34.3218
200	17	84786041	T|ENSMUSG00000024120|ENSMUST00000112308|Transcript|intron_variant||||||||-1;T|ENSMUSG00000024120|ENSMUST00000161299|Transcript|intron_variant&non_coding_transcript_variant||||||||-1;T|ENSMUSG00000024120|ENSMUST00000161928|Transcript|intron_variant&non_coding_transcript_variant||||||||-1	34.3218
201	17	84786452	T|ENSMUSG00000024120|ENSMUST00000112308|Transcript|intron_variant||||||||-1;T|ENSMUSG00000024120|ENSMUST00000161299|Transcript|intron_variant&non_coding_transcript_variant||||||||-1;T|ENSMUSG00000024120|ENSMUST00000161928|Transcript|intron_variant&non_coding_transcript_variant||||||||-1	34.3218
202	17	84786456	A|ENSMUSG00000024120|ENSMUST00000112308|Transcript|intron_variant||||||||-1;A|ENSMUSG00000024120|ENSMUST00000161299|Transcript|intron_variant&non_coding_transcript_variant||||||||-1;A|ENSMUSG00000024120|ENSMUST00000161928|Transcript|intron_variant&non_coding_transcript_variant||||||||-1	34.3218
203	17	84787027	G|ENSMUSG00000024120|ENSMUST00000112308|Transcript|intron_variant||||||||-1;G|ENSMUSG00000024120|ENSMUST00000161299|Transcript|intron_variant&non_coding_transcript_variant||||||||-1;G|ENSMUSG00000024120|ENSMUST00000161928|Transcript|intron_variant&non_coding_transcript_variant||||||||-1	34.3218
204	17	84787071	A|ENSMUSG00000024120|ENSMUST00000112308|Transcript|intron_variant||||||||-1;A|ENSMUSG00000024120|ENSMUST00000161299|Transcript|intron_variant&non_coding_transcript_variant||||||||-1;A|ENSMUSG00000024120|ENSMUST00000161928|Transcript|intron_variant&non_coding_transcript_variant||||||||-1	34.3218
205	17	84787238	A|ENSMUSG00000024120|ENSMUST00000112308|Transcript|intron_variant||||||||-1;A|ENSMUSG00000024120|ENSMUST00000161299|Transcript|intron_variant&non_coding_transcript_variant||||||||-1;A|ENSMUSG00000024120|ENSMUST00000161928|Transcript|intron_variant&non_coding_transcript_variant||||||||-1	34.3218
206	17	84787247	T|ENSMUSG00000024120|ENSMUST00000112308|Transcript|intron_variant||||||||-1;T|ENSMUSG00000024120|ENSMUST00000161299|Transcript|intron_variant&non_coding_transcript_variant||||||||-1;T|ENSMUSG00000024120|ENSMUST00000161928|Transcript|intron_variant&non_coding_transcript_variant||||||||-1	34.3218
207	17	84787431	A|ENSMUSG00000024120|ENSMUST00000112308|Transcript|intron_variant||||||||-1;A|ENSMUSG00000024120|ENSMUST00000161299|Transcript|intron_variant&non_coding_transcript_variant||||||||-1;A|ENSMUSG00000024120|ENSMUST00000161928|Transcript|intron_variant&non_coding_transcript_variant||||||||-1	34.3218
208	17	84787491	A|ENSMUSG00000024120|ENSMUST00000112308|Transcript|intron_variant||||||||-1;A|ENSMUSG00000024120|ENSMUST00000161299|Transcript|intron_variant&non_coding_transcript_variant||||||||-1;A|ENSMUSG00000024120|ENSMUST00000161928|Transcript|intron_variant&non_coding_transcript_variant||||||||-1	34.3218
209	17	84787890	T|ENSMUSG00000024120|ENSMUST00000112308|Transcript|intron_variant||||||||-1;T|ENSMUSG00000024120|ENSMUST00000161299|Transcript|intron_variant&non_coding_transcript_variant||||||||-1;T|ENSMUSG00000024120|ENSMUST00000161928|Transcript|intron_variant&non_coding_transcript_variant||||||||-1	34.3218
210	17	84788561	A|ENSMUSG00000024120|ENSMUST00000112308|Transcript|intron_variant||||||||-1;A|ENSMUSG00000024120|ENSMUST00000161299|Transcript|intron_variant&non_coding_transcript_variant||||||||-1;A|ENSMUSG00000024120|ENSMUST00000161928|Transcript|intron_variant&non_coding_transcript_variant||||||||-1	34.3218
211	17	84788648	G|ENSMUSG00000024120|ENSMUST00000112308|Transcript|intron_variant||||||||-1;G|ENSMUSG00000024120|ENSMUST00000161299|Transcript|intron_variant&non_coding_transcript_variant||||||||-1;G|ENSMUSG00000024120|ENSMUST00000161928|Transcript|intron_variant&non_coding_transcript_variant||||||||-1	34.3218
212	17	84788905	G|ENSMUSG00000024120|ENSMUST00000112308|Transcript|intron_variant||||||||-1;G|ENSMUSG00000024120|ENSMUST00000161299|Transcript|intron_variant&non_coding_transcript_variant||||||||-1;G|ENSMUSG00000024120|ENSMUST00000161928|Transcript|intron_variant&non_coding_transcript_variant||||||||-1	34.3218
213	17	84788930	A|ENSMUSG00000024120|ENSMUST00000112308|Transcript|intron_variant||||||||-1;A|ENSMUSG00000024120|ENSMUST00000161299|Transcript|intron_variant&non_coding_transcript_variant||||||||-1;A|ENSMUSG00000024120|ENSMUST00000161928|Transcript|intron_variant&non_coding_transcript_variant||||||||-1	34.3218
214	17	84789330	A|ENSMUSG00000024120|ENSMUST00000112308|Transcript|intron_variant||||||||-1;A|ENSMUSG00000024120|ENSMUST00000161299|Transcript|intron_variant&non_coding_transcript_variant||||||||-1;A|ENSMUSG00000024120|ENSMUST00000161928|Transcript|intron_variant&non_coding_transcript_variant||||||||-1	34.3218
215	17	84789506	A|ENSMUSG00000024120|ENSMUST00000112308|Transcript|intron_variant||||||||-1;A|ENSMUSG00000024120|ENSMUST00000161299|Transcript|intron_variant&non_coding_transcript_variant||||||||-1;A|ENSMUSG00000024120|ENSMUST00000161928|Transcript|intron_variant&non_coding_transcript_variant||||||||-1	34.3218
216	17	83820462	G|ENSMUSG00000055817|ENSMUST00000176054|Transcript|downstream_gene_variant|||||||246|1;G|ENSMUSG00000055817|ENSMUST00000177069|Transcript|3_prime_UTR_variant&NMD_transcript_variant|2233|||||||1	32.317
217	17	83820472	G|ENSMUSG00000055817|ENSMUST00000176054|Transcript|downstream_gene_variant|||||||256|1;G|ENSMUSG00000055817|ENSMUST00000177069|Transcript|3_prime_UTR_variant&NMD_transcript_variant|2243|||||||1	32.317
218	17	83822170	T|ENSMUSG00000055817|ENSMUST00000176054|Transcript|downstream_gene_variant|||||||1954|1;G|ENSMUSG00000055817|ENSMUST00000176054|Transcript|downstream_gene_variant|||||||1954|1;T|ENSMUSG00000055817|ENSMUST00000177069|Transcript|downstream_gene_variant|||||||654|1;G|ENSMUSG00000055817|ENSMUST00000177069|Transcript|downstream_gene_variant|||||||654|1	30.9308
219	17	83996888	A||||intergenic_variant||||||||	30.4193
220	17	84002647	T||||intergenic_variant||||||||	30.4193
221	17	84002747	C||||intergenic_variant||||||||	30.4193
222	17	84714282	C|ENSMUSG00000024120|ENSMUST00000162799|Transcript|intron_variant&non_coding_transcript_variant||||||||-1;C|ENSMUSG00000024120|ENSMUST00000112308|Transcript|intron_variant||||||||-1	29.4977
223	17	84717626	T|ENSMUSG00000024120|ENSMUST00000162799|Transcript|intron_variant&non_coding_transcript_variant||||||||-1;T|ENSMUSG00000024120|ENSMUST00000112308|Transcript|intron_variant||||||||-1	29.4977
224	17	84718469	T|ENSMUSG00000024120|ENSMUST00000162799|Transcript|intron_variant&non_coding_transcript_variant||||||||-1;T|ENSMUSG00000024120|ENSMUST00000112308|Transcript|intron_variant||||||||-1	29.4977
225	17	84719752	T|ENSMUSG00000024120|ENSMUST00000162799|Transcript|intron_variant&non_coding_transcript_variant||||||||-1;T|ENSMUSG00000024120|ENSMUST00000112308|Transcript|intron_variant||||||||-1	29.4977
226	17	84720312	G|ENSMUSG00000024120|ENSMUST00000162799|Transcript|intron_variant&non_coding_transcript_variant||||||||-1;G|ENSMUSG00000024120|ENSMUST00000112308|Transcript|intron_variant||||||||-1	29.4977
227	17	84721400	G|ENSMUSG00000024120|ENSMUST00000162799|Transcript|intron_variant&non_coding_transcript_variant||||||||-1;G|ENSMUSG00000024120|ENSMUST00000112308|Transcript|intron_variant||||||||-1	29.4977
228	17	84721706	C|ENSMUSG00000024120|ENSMUST00000162799|Transcript|intron_variant&non_coding_transcript_variant||||||||-1;C|ENSMUSG00000024120|ENSMUST00000112308|Transcript|intron_variant||||||||-1	29.4977
229	17	84721824	G|ENSMUSG00000024120|ENSMUST00000162799|Transcript|intron_variant&non_coding_transcript_variant||||||||-1;G|ENSMUSG00000024120|ENSMUST00000112308|Transcript|intron_variant||||||||-1	29.4977
230	17	84721905	C|ENSMUSG00000024120|ENSMUST00000162799|Transcript|intron_variant&non_coding_transcript_variant||||||||-1;C|ENSMUSG00000024120|ENSMUST00000112308|Transcript|intron_variant||||||||-1	29.4977
231	17	84721924	C|ENSMUSG00000024120|ENSMUST00000162799|Transcript|intron_variant&non_coding_transcript_variant||||||||-1;C|ENSMUSG00000024120|ENSMUST00000112308|Transcript|intron_variant||||||||-1	29.4977
232	17	84722004	G|ENSMUSG00000024120|ENSMUST00000162799|Transcript|intron_variant&non_coding_transcript_variant||||||||-1;G|ENSMUSG00000024120|ENSMUST00000112308|Transcript|intron_variant||||||||-1	29.4977
233	17	84722160	G|ENSMUSG00000024120|ENSMUST00000162799|Transcript|intron_variant&non_coding_transcript_variant||||||||-1;G|ENSMUSG00000024120|ENSMUST00000112308|Transcript|intron_variant||||||||-1	29.4977
234	17	84722355	G|ENSMUSG00000024120|ENSMUST00000162799|Transcript|intron_variant&non_coding_transcript_variant||||||||-1;G|ENSMUSG00000024120|ENSMUST00000112308|Transcript|intron_variant||||||||-1	29.4977
235	17	84722382	A|ENSMUSG00000024120|ENSMUST00000162799|Transcript|intron_variant&non_coding_transcript_variant||||||||-1;A|ENSMUSG00000024120|ENSMUST00000112308|Transcript|intron_variant||||||||-1	29.4977
236	17	84722570	T|ENSMUSG00000024120|ENSMUST00000162799|Transcript|intron_variant&non_coding_transcript_variant||||||||-1;T|ENSMUSG00000024120|ENSMUST00000112308|Transcript|intron_variant||||||||-1	29.4977
237	17	84723107	T|ENSMUSG00000024120|ENSMUST00000162799|Transcript|intron_variant&non_coding_transcript_variant||||||||-1;T|ENSMUSG00000024120|ENSMUST00000112308|Transcript|intron_variant||||||||-1	29.4977
238	17	84724615	C|ENSMUSG00000024120|ENSMUST00000162799|Transcript|intron_variant&non_coding_transcript_variant||||||||-1;C|ENSMUSG00000024120|ENSMUST00000112308|Transcript|intron_variant||||||||-1	29.4977
239	17	84725829	C|ENSMUSG00000024120|ENSMUST00000162799|Transcript|intron_variant&non_coding_transcript_variant||||||||-1;C|ENSMUSG00000024120|ENSMUST00000112308|Transcript|intron_variant||||||||-1	29.4977
240	17	84726217	C|ENSMUSG00000024120|ENSMUST00000162799|Transcript|intron_variant&non_coding_transcript_variant||||||||-1;C|ENSMUSG00000024120|ENSMUST00000160011|Transcript|downstream_gene_variant|||||||4963|-1;C|ENSMUSG00000024120|ENSMUST00000112308|Transcript|intron_variant||||||||-1	29.4977
241	17	84727858	G|ENSMUSG00000024120|ENSMUST00000162799|Transcript|intron_variant&non_coding_transcript_variant||||||||-1;G|ENSMUSG00000024120|ENSMUST00000160011|Transcript|downstream_gene_variant|||||||3322|-1;G|ENSMUSG00000024120|ENSMUST00000112308|Transcript|intron_variant||||||||-1	29.4977
242	17	84728291	C|ENSMUSG00000024120|ENSMUST00000162799|Transcript|intron_variant&non_coding_transcript_variant||||||||-1;C|ENSMUSG00000024120|ENSMUST00000160011|Transcript|downstream_gene_variant|||||||2889|-1;C|ENSMUSG00000024120|ENSMUST00000112308|Transcript|intron_variant||||||||-1	29.4977
243	17	84728402	T|ENSMUSG00000024120|ENSMUST00000162799|Transcript|intron_variant&non_coding_transcript_variant||||||||-1;T|ENSMUSG00000024120|ENSMUST00000160011|Transcript|downstream_gene_variant|||||||2778|-1;T|ENSMUSG00000024120|ENSMUST00000112308|Transcript|intron_variant||||||||-1	29.4977
244	17	84732359	C|ENSMUSG00000024120|ENSMUST00000162799|Transcript|upstream_gene_variant|||||||1175|-1;C|ENSMUSG00000024120|ENSMUST00000160011|Transcript|intron_variant&NMD_transcript_variant||||||||-1;C|ENSMUSG00000024120|ENSMUST00000112308|Transcript|intron_variant||||||||-1	29.4977
245	17	84741895	C|ENSMUSG00000024120|ENSMUST00000160011|Transcript|intron_variant&NMD_transcript_variant||||||||-1;C|ENSMUSG00000024120|ENSMUST00000112308|Transcript|intron_variant||||||||-1	29.4977
246	17	84747298	C|ENSMUSG00000024120|ENSMUST00000160011|Transcript|intron_variant&NMD_transcript_variant||||||||-1;C|ENSMUSG00000024120|ENSMUST00000160414|Transcript|downstream_gene_variant|||||||1483|-1;C|ENSMUSG00000024120|ENSMUST00000112308|Transcript|intron_variant||||||||-1	29.4977
247	17	84747394	G|ENSMUSG00000024120|ENSMUST00000160011|Transcript|intron_variant&NMD_transcript_variant||||||||-1;G|ENSMUSG00000024120|ENSMUST00000160414|Transcript|downstream_gene_variant|||||||1387|-1;G|ENSMUSG00000024120|ENSMUST00000112308|Transcript|intron_variant||||||||-1	29.4977
248	17	84749209	G|ENSMUSG00000024120|ENSMUST00000160011|Transcript|intron_variant&NMD_transcript_variant||||||||-1;G|ENSMUSG00000024120|ENSMUST00000160414|Transcript|intron_variant&non_coding_transcript_variant||||||||-1;G|ENSMUSG00000024120|ENSMUST00000112308|Transcript|intron_variant||||||||-1	29.4977
249	17	84750078	G|ENSMUSG00000024120|ENSMUST00000160011|Transcript|intron_variant&NMD_transcript_variant||||||||-1;G|ENSMUSG00000024120|ENSMUST00000160414|Transcript|intron_variant&non_coding_transcript_variant||||||||-1;G|ENSMUSG00000024120|ENSMUST00000112308|Transcript|intron_variant||||||||-1	29.4977
250	17	84751102	A|ENSMUSG00000024120|ENSMUST00000160011|Transcript|intron_variant&NMD_transcript_variant||||||||-1;A|ENSMUSG00000024120|ENSMUST00000160414|Transcript|intron_variant&non_coding_transcript_variant||||||||-1;A|ENSMUSG00000024120|ENSMUST00000112308|Transcript|intron_variant||||||||-1	29.4977
251	17	84753007	G|ENSMUSG00000024120|ENSMUST00000160011|Transcript|upstream_gene_variant|||||||1745|-1;G|ENSMUSG00000024120|ENSMUST00000160414|Transcript|upstream_gene_variant|||||||1745|-1;G|ENSMUSG00000024120|ENSMUST00000112308|Transcript|intron_variant||||||||-1	29.4977
252	17	84757300	T|ENSMUSG00000024120|ENSMUST00000112308|Transcript|intron_variant||||||||-1	29.4977
253	17	84758696	G|ENSMUSG00000024120|ENSMUST00000112308|Transcript|intron_variant||||||||-1	29.4977
254	17	84758739	C|ENSMUSG00000024120|ENSMUST00000112308|Transcript|intron_variant||||||||-1	29.4977
255	17	84764561	A|ENSMUSG00000024120|ENSMUST00000112308|Transcript|intron_variant||||||||-1;A|ENSMUSG00000024120|ENSMUST00000161299|Transcript|downstream_gene_variant|||||||3028|-1;A|ENSMUSG00000024120|ENSMUST00000161928|Transcript|downstream_gene_variant|||||||1867|-1	29.4977
256	17	84775036	G|ENSMUSG00000024120|ENSMUST00000112308|Transcript|intron_variant||||||||-1;G|ENSMUSG00000024120|ENSMUST00000159222|Transcript|intron_variant&non_coding_transcript_variant||||||||-1;G|ENSMUSG00000024120|ENSMUST00000161299|Transcript|intron_variant&non_coding_transcript_variant||||||||-1;G|ENSMUSG00000024120|ENSMUST00000161928|Transcript|intron_variant&non_coding_transcript_variant||||||||-1	29.4977
257	17	84790632	G|ENSMUSG00000024120|ENSMUST00000112308|Transcript|upstream_gene_variant|||||||74|-1;G|ENSMUSG00000024120|ENSMUST00000161299|Transcript|upstream_gene_variant|||||||70|-1;G|ENSMUSG00000024120|ENSMUST00000161928|Transcript|non_coding_transcript_exon_variant&non_coding_transcript_variant|158|||||||-1	29.4693
258	17	84805971	G||||intergenic_variant||||||||	29.4693
259	17	84810133	A||||intergenic_variant||||||||	29.4693
260	17	84648922	T|ENSMUSG00000024253|ENSMUST00000025101|Transcript|intron_variant||||||||1	29.4449
261	17	84815320	C||||intergenic_variant||||||||	29.4144
262	17	83816982	T|ENSMUSG00000055817|ENSMUST00000067826|Transcript|downstream_gene_variant|||||||2077|1;T|ENSMUSG00000055817|ENSMUST00000176054|Transcript|intron_variant||||||||1;T|ENSMUSG00000055817|ENSMUST00000177069|Transcript|intron_variant&NMD_transcript_variant||||||||1	28.5522
263	17	83817129	A|ENSMUSG00000055817|ENSMUST00000067826|Transcript|downstream_gene_variant|||||||2224|1;A|ENSMUSG00000055817|ENSMUST00000176054|Transcript|intron_variant||||||||1;A|ENSMUSG00000055817|ENSMUST00000177069|Transcript|intron_variant&NMD_transcript_variant||||||||1	28.5522
264	17	83817888	A|ENSMUSG00000055817|ENSMUST00000067826|Transcript|downstream_gene_variant|||||||2983|1;A|ENSMUSG00000055817|ENSMUST00000176054|Transcript|intron_variant||||||||1;A|ENSMUSG00000055817|ENSMUST00000177069|Transcript|intron_variant&NMD_transcript_variant||||||||1	28.5522
265	17	83818015	T|ENSMUSG00000055817|ENSMUST00000067826|Transcript|downstream_gene_variant|||||||3110|1;T|ENSMUSG00000055817|ENSMUST00000176054|Transcript|intron_variant||||||||1;T|ENSMUSG00000055817|ENSMUST00000177069|Transcript|intron_variant&NMD_transcript_variant||||||||1	28.5522
266	17	83818102	A|ENSMUSG00000055817|ENSMUST00000067826|Transcript|downstream_gene_variant|||||||3197|1;A|ENSMUSG00000055817|ENSMUST00000176054|Transcript|intron_variant||||||||1;A|ENSMUSG00000055817|ENSMUST00000177069|Transcript|intron_variant&NMD_transcript_variant||||||||1	28.5522
267	17	83820480	A|ENSMUSG00000055817|ENSMUST00000176054|Transcript|downstream_gene_variant|||||||264|1;A|ENSMUSG00000055817|ENSMUST00000177069|Transcript|3_prime_UTR_variant&NMD_transcript_variant|2251|||||||1	28.5522
268	17	83822685	A|ENSMUSG00000055817|ENSMUST00000176054|Transcript|downstream_gene_variant|||||||2469|1;A|ENSMUSG00000055817|ENSMUST00000177069|Transcript|downstream_gene_variant|||||||1169|1	28.5522
269	17	83823023	A|ENSMUSG00000055817|ENSMUST00000176054|Transcript|downstream_gene_variant|||||||2807|1;A|ENSMUSG00000055817|ENSMUST00000177069|Transcript|downstream_gene_variant|||||||1507|1	28.5522
270	17	83823048	T|ENSMUSG00000055817|ENSMUST00000176054|Transcript|downstream_gene_variant|||||||2832|1;T|ENSMUSG00000055817|ENSMUST00000177069|Transcript|downstream_gene_variant|||||||1532|1	28.5522
271	17	83823269	T|ENSMUSG00000055817|ENSMUST00000176054|Transcript|downstream_gene_variant|||||||3053|1;T|ENSMUSG00000055817|ENSMUST00000177069|Transcript|downstream_gene_variant|||||||1753|1	28.5522
272	17	83823295	G|ENSMUSG00000055817|ENSMUST00000176054|Transcript|downstream_gene_variant|||||||3079|1;G|ENSMUSG00000055817|ENSMUST00000177069|Transcript|downstream_gene_variant|||||||1779|1	28.5522
273	17	83823758	A|ENSMUSG00000055817|ENSMUST00000176054|Transcript|downstream_gene_variant|||||||3542|1;A|ENSMUSG00000055817|ENSMUST00000177069|Transcript|downstream_gene_variant|||||||2242|1	28.5522
274	17	83824013	A|ENSMUSG00000055817|ENSMUST00000176054|Transcript|downstream_gene_variant|||||||3797|1;A|ENSMUSG00000055817|ENSMUST00000177069|Transcript|downstream_gene_variant|||||||2497|1	28.5522
275	17	83824788	T|ENSMUSG00000055817|ENSMUST00000176054|Transcript|downstream_gene_variant|||||||4572|1;T|ENSMUSG00000055817|ENSMUST00000177069|Transcript|downstream_gene_variant|||||||3272|1	25.7883

## Sheet: Supplementary File 1j
Supplementary File 1j. Protein-protein correlations between the three candidates and known
hypertrophic markers.
The bicor P values between the respective markers and each locus candidate gene
are listed.
S.No.	Locus	Candidate protein	Hypertrophic markers	bicor	P	N
1	Chr13	NDUFS4	NPPA	-0.271	0.02	72
2			MYH7	0.082	0.49	72
3	Chr17	LRPPRC	NPPA	0.07	0.56	72
4			MYH7	-0.216	0.07	72
5	Chr7	COQ7	NPPA	-0.233	0.05	72
6			MYH7	0.151	0.21	72
