# Supplementary material for: Genetic architecture of heart mitochondrial proteome influencing cardiac hypertrophy
Source: eLife. 2023 Jun 5;12:e82619. doi: 10.7554/eLife.82619 (PMC10241513; doi:10.7554/eLife.82619)
Supplement: Supplementary file 2. [file elife-82619-supp2.xlsx]

## Sheet: 2a. skeletal muscle
DO mouse	mt-Rnr1	mt-Rnr2	mt-Nd1	mt-Nd2	mt-Nd3	mt-Nd4	mt-Nd4l	mt-Nd5	mt-Nd6	mt-Cytb	mt-Co1	mt-Co2	mt-Co3	mt-Atp6	mt-Atp8
DO021	16.4778	17.7087	19.3295	18.9886	14.2346	20.1308	15.6884	19.7809	17.8784	20.3322	21.6835	16.7975	18.5998	17.5433	17.7083
DO022	16.074	17.1823	19.436	18.7902	14.3393	19.7864	10.9461	19.4024	17.5821	20.1841	21.2076	10.7636	18.3828	17.6729	16.9519
DO023	16.9513	17.741	19.5429	19.2586	14.4591	19.961	15.8901	19.5904	17.4009	20.1716	21.4028	16.6045	17.8219	17.031	17.6476
DO024	16.8753	18.2755	19.6283	19.2844	14.7801	20.067	16.1279	19.6674	17.6476	20.2093	21.5382	16.9043	18.1046	17.2165	17.7797
DO025	16.9228	17.8968	19.6132	19.8339	13.846	20.1581	16.0231	19.7068	17.8971	20.4924	21.6048	8.93499	18.8854	18.4723	17.8155
DO026	17.0965	18.0034	19.3073	19.0462	14.7181	19.7564	15.8891	19.2584	17.0781	20.0766	21.2838	16.7108	18.3073	17.0955	17.2766
DO027	15.991	17.4986	19.0372	18.8696	14.6696	19.7849	15.9866	19.4149	17.3977	20.1509	21.2842	16.8159	18.1649	17.0956	16.6657
DO028	16.5051	17.9552	19.4507	19.2967	13.9103	20.2773	15.6226	19.6269	17.6116	20.2706	21.5279	16.9385	18.48	17.4417	18.6035
DO030	16.5763	17.7685	19.3462	19.2905	14.5266	19.9325	15.9148	19.6426	17.5057	20.2074	21.4821	16.5102	18.4067	17.0594	17.7891
DO031	16.5418	17.6557	18.8577	18.4344	14.1024	19.3882	16.0091	19.1434	17.0401	19.6887	21.0515	16.3939	17.3862	16.6778	16.9503
DO032	16.1785	17.6078	19.0501	18.7596	14.5674	19.7694	16.1221	19.3156	17.3739	20.157	21.3636	16.9001	18.2142	17.1445	16.7408
DO033	16.7821	17.9402	19.3985	19.0706	14.4787	19.8467	15.8215	19.5331	17.493	20.2131	21.443	16.5613	17.903	17.0818	17.9016
DO034	16.4825	17.7983	19.2561	18.7883	14.3698	19.7756	15.7569	19.4591	17.4783	20.1875	21.4627	16.8908	18.3396	17.1961	16.8055
DO035	16.4227	17.6803	19.1786	19.2268	14.2754	19.9786	11.1126	19.5591	17.4511	20.2727	21.444	17.0247	18.2089	17.4214	17.55
DO036	16.3525	17.4018	19.2562	18.5662	14.4341	19.5443	10.8472	19.1942	17.3507	20.0817	21.2311	10.5971	18.568	17.552	16.9222
DO037	16.3833	17.6826	19.7539	19.6179	14.0597	20.6641	15.7224	19.9931	17.9696	20.5675	21.8495	17.2067	18.8239	17.7189	18.9461
DO038	16.6549	17.6734	19.5019	19.2425	14.3423	20.1969	16.4629	19.6796	17.7597	20.5151	21.7667	16.9353	18.5455	17.3851	17.5381
DO039	16.3245	17.5491	19.2956	19.1373	14.6335	19.9489	11.3274	19.6758	17.6231	20.1796	21.4268	16.9625	18.2823	17.1587	17.4912
DO040	16.5341	18.0181	19.4911	19.2101	14.6718	19.9738	16.0079	19.5905	17.4499	20.2095	21.5032	16.6968	18.4894	17.2151	17.5804
DO041	16.1207	17.5039	19.2309	19.0979	13.9989	19.787	16.1151	19.339	17.2099	20.0542	21.3472	16.4356	17.6086	16.7761	17.5962
DO042	16.8266	18.1031	19.3852	19.0462	14.1013	19.9675	15.7544	19.4416	17.5035	20.3527	21.518	16.84	18.5324	17.3452	17.2452
DO043	16.4148	17.5076	19.2449	18.997	15.3719	19.8888	11.3343	19.413	17.3939	19.9934	21.2745	17.0569	18.2127	17.4546	17.5293
DO044	16.5215	17.6237	19.2633	19.3932	14.0275	19.8749	16.2601	19.4396	17.5497	20.147	21.2574	8.65526	18.6417	18.1623	17.2002
DO046	17.695	18.7738	19.7457	19.6306	14.9745	20.2042	16.1547	20.0134	17.9096	20.608	21.7623	16.9123	18.7894	17.2998	18.1091
DO047	16.6893	17.8531	19.2479	18.8617	14.2407	19.9395	15.8437	19.4533	17.4986	20.3443	21.435	16.919	18.4961	17.347	16.9947
DO308	16.798	17.583	19.6437	19.2157	14.6782	20.1931	11.3436	19.604	17.7235	20.4615	21.8084	11.0175	19.0141	18.0189	17.7386
DO049	16.4672	17.6524	19.1375	18.6141	14.5684	19.7625	16.0355	19.3812	17.4132	20.1954	21.3517	16.8927	18.2675	17.1711	16.5892
DO050	16.8859	18.0059	19.0525	18.4861	14.3665	19.7419	16.061	19.3558	17.3316	20.2608	21.5014	16.9314	18.2603	17.1797	16.4591
DO051	16.4369	17.7233	19.6133	19.344	14.7364	20.0583	15.8362	19.8016	17.8962	20.2351	21.7627	16.7349	18.0488	17.4804	17.992
DO052	16.32	17.5872	19.4366	19.0825	14.6911	19.7606	15.7994	19.3128	17.216	20.0709	21.4206	16.7305	18.4369	17.0049	17.4101
DO053	17.0878	18.6209	19.9581	20.0345	14.622	20.7505	10.9098	20.2636	18.3349	20.6084	22.0066	17.3773	18.9809	18.0438	19.2148
DO054	16.4494	17.5971	18.8876	18.9058	14.5082	19.556	10.8628	19.2787	17.2126	19.8857	21.0903	16.9208	17.3255	16.6456	16.9788
DO055	16.805	17.8627	19.492	19.2206	15.1881	19.914	15.9773	19.4944	17.3692	20.2514	21.5204	16.7815	18.3386	17.106	17.4596
DO056	16.8672	18.0485	19.8314	19.8814	13.8344	20.3585	15.7519	19.7983	17.9462	20.4527	21.5988	10.0366	18.9398	18.4759	18.1763
DO057	16.4903	18.1049	19.6988	19.2585	14.5729	20.1478	15.8236	19.6475	17.647	20.5453	21.8105	17.0798	18.6585	17.4127	17.8799
DO058	16.9695	17.7008	19.1412	18.8423	14.7465	19.6264	16.247	19.3116	17.1917	19.8543	21.1006	16.4801	17.5274	16.8715	16.917
DO059	16.3592	17.986	19.4673	19.2927	14.3629	19.9984	10.8497	19.572	17.5404	20.243	21.5307	16.9199	18.4447	17.509	17.6979
DO060	16.7026	17.8575	19.1626	19.0915	14.371	19.8408	15.849	19.4332	17.278	20.1868	21.5537	16.5092	18.3762	16.9966	17.9202
DO061	16.446	18.0757	19.5801	19.8935	13.8366	20.2783	15.8384	19.9203	18.0656	20.5478	21.6277	9.30173	18.9221	18.5665	18.0315
DO062	16.7983	18.09	19.2332	18.7876	14.2265	19.555	15.7647	19.146	16.9926	19.8994	21.0833	16.509	18.0951	16.763	17.302
DO063	16.1466	17.5869	18.9615	18.6015	14.2136	19.5933	16.0204	19.2517	17.2346	19.9757	21.2096	16.767	17.9845	16.9783	16.6709
DO064	16.6628	18.1809	19.9026	19.8323	13.6063	20.3062	15.8083	19.9754	18.0685	20.6497	21.9112	9.35544	19.027	18.7052	18.4796
DO065	16.675	17.8897	19.2794	18.9512	14.3273	20.0181	16.0386	19.5374	17.5691	20.4171	21.5204	16.9234	18.4577	17.3387	16.9602
DO066	16.771	17.8679	19.2294	19.0284	14.6198	19.7495	11.5669	19.3702	17.203	19.9964	21.1531	16.9387	18.1857	17.238	17.0985
DO067	16.819	18.2925	19.9187	19.8809	14.1505	20.249	16.0267	20.064	18.2512	20.5646	21.7147	9.39373	19.1138	18.6804	18.0997
DO068	16.4532	17.8378	18.8853	18.6806	15.1554	19.8175	16.1751	19.3944	17.4259	19.9988	21.1527	16.8969	18.0674	17.2386	16.7449
DO069	16.7109	17.6822	19.1629	18.7879	15.3211	19.9846	16.4681	19.4111	17.4659	20.2729	21.5423	17.0958	18.3927	17.5135	16.9568
DO070	16.9749	18.4002	19.5618	19.3165	13.7202	20.2478	10.6566	19.7354	17.8372	20.2343	21.578	17.3954	17.9404	17.337	18.1644
DO071	17.0187	18.1531	19.2154	19.0926	15.0326	19.6631	15.7863	19.3989	17.3056	19.9526	21.2294	16.4041	17.5568	16.8477	17.1868
DO072	16.5327	17.7299	19.7327	19.2187	14.2948	19.8827	15.6664	19.7054	17.6253	20.1421	21.6407	16.7808	17.8927	17.0186	18.117
DO073	16.8144	18.0638	19.6595	19.5085	14.4959	20.1371	16.3187	19.6818	17.6175	20.2518	21.7107	16.8205	18.6606	17.4624	17.7256
DO074	17.1026	18.3297	19.3955	19.1168	14.3927	20.0487	16.1134	19.6505	17.6855	20.4984	21.7022	16.8179	18.4996	17.2006	17.5905
DO075	16.5955	18.021	19.727	19.5688	14.4918	20.1016	16.153	19.7971	17.6058	20.2906	21.6577	16.8771	18.4923	17.1862	17.7243
DO076	16.3468	17.7318	19.3514	19.06	14.5478	19.825	15.9391	19.46	17.279	20.0212	21.3922	16.556	18.3744	17.0355	17.3427
DO078	17.5733	19.0171	20.1192	20.1058	14.7126	21.0756	15.904	20.51	18.6104	20.8852	22.1457	17.1888	19.0975	17.9864	18.9998
DO079	16.6761	18.1097	19.5278	19.4516	14.1374	19.9577	16.3628	19.6067	17.7352	20.3	21.5611	8.93982	18.7974	18.3478	17.2365
DO080	16.8867	17.7986	19.2897	19.0596	14.4596	19.9648	16.383	19.6758	17.8209	20.2772	21.5024	16.8424	18.3048	17.3769	16.9783
DO081	16.5095	18.0017	19.7225	19.588	14.6796	20.1468	16.0482	19.8798	17.7176	20.386	21.7447	16.7196	17.9901	17.0216	18.1182
DO082	16.217	17.7213	19.405	19.2584	14.9506	19.8999	15.9009	19.4991	17.3148	20.0313	21.3689	16.791	18.274	17.0951	17.4083
DO083	16.29	17.6958	19.6645	19.4155	14.2429	20.1611	15.9251	19.6243	17.6367	20.2413	21.6999	16.7822	18.1072	17.3151	18.0972
DO084	16.4846	17.5291	19.3355	19.103	14.4848	19.8426	15.9961	19.3483	17.2723	20.0613	21.45	16.6651	18.4049	17.1541	17.3543
DO085	16.9298	18.3735	20.2356	20.0267	14.4887	20.6987	11.0087	20.2755	18.2425	20.5313	22.022	17.3823	19.0224	17.929	19.1624
DO086	16.2517	17.3212	18.9766	18.5153	14.0673	19.4955	15.8732	19.1278	17.198	19.7864	21.2849	16.8182	17.9266	16.9751	16.6794
DO087	16.8218	17.8198	19.4741	19.257	14.4419	20.1037	16.5259	19.7391	17.8354	20.4826	21.7416	16.8982	18.5417	17.6604	17.4102
DO088	16.5427	17.9152	19.6591	19.601	15.0032	20.1549	16.2461	19.7348	17.6251	20.3673	21.5788	16.8707	18.5421	17.2187	17.8529
DO089	16.4781	17.798	19.61	19.3382	14.6356	20.0386	11.0113	19.6813	17.5826	20.2342	21.4384	17.044	18.3257	17.4145	17.5883
DO090	16.8934	18.3684	19.5874	19.8964	13.6802	20.485	15.9336	19.9795	18.0553	20.3404	21.6016	9.3623	18.9802	18.7932	18.5866
DO091	16.9897	17.8031	19.7105	19.5723	14.165	20.0362	15.8665	19.5539	17.7659	20.2317	21.6194	9.45351	18.7707	18.1913	17.5149
DO092	16.407	18.0213	19.6452	19.4	14.4034	19.9357	15.9136	19.6553	17.4904	20.1834	21.6034	16.8174	17.8283	16.9746	17.9208
DO093	16.2654	17.5473	19.7773	19.4741	14.4581	20.1374	16.2892	19.7865	17.6513	20.3803	21.691	16.9283	18.5585	17.2228	17.7901
DO094	17.4258	18.6259	19.8335	19.9336	14.4573	20.4626	15.7481	19.9721	18.2342	20.4727	21.7344	9.23492	19.0552	18.7567	18.5221
DO095	16.7903	18.2655	20.0044	19.7147	15.1305	20.3836	16.3421	19.9818	17.9372	20.5408	21.9829	17.0637	18.9362	17.5701	18.2315
DO096	17.0043	18.1788	19.6611	19.4676	14.6107	20.0893	16.024	19.7285	17.919	20.2618	21.5266	10.5283	18.8071	18.2449	17.4537
DO097	16.4357	17.3287	19.5176	18.947	14.5754	19.8697	11.5737	19.697	17.9734	20.354	21.476	10.4161	18.8919	17.8612	16.977
DO098	16.5239	17.6735	19.3735	19.0332	14.0509	19.7978	15.5269	19.5357	17.456	20.0284	21.5373	16.6213	17.7978	17.1145	17.4248
DO099	16.2047	17.9818	19.7642	19.6387	14.0555	20.2795	10.881	19.8465	17.8256	20.1403	21.6662	16.9253	18.6368	17.6198	18.5521
DO101	16.7843	17.9043	19.6584	19.5648	14.0374	20.4769	16.3714	19.9267	18.0317	20.6055	21.8486	16.9352	18.8142	17.5161	18.2798
DO102	16.7064	18.2037	19.8129	19.5472	14.6692	20.2305	16.4014	20.0306	17.9898	20.4412	21.7366	16.8738	18.1084	17.3416	17.8642
DO103	17.0494	18.0687	19.175	18.8238	14.3435	19.5575	15.5002	19.2986	17.2154	19.85	21.1951	16.4917	18.0037	16.8187	17.3029
DO104	16.2454	17.6037	19.4343	19.3189	13.6498	19.7571	15.2861	18.9673	17.5628	20.1164	21.4641	9.41256	18.8189	18.3218	17.1282
DO105	16.2062	17.6003	19.4198	19.1997	14.6124	19.8894	15.9109	19.7359	17.5992	20.1952	21.5686	16.5872	17.7613	17.1273	17.8433
DO106	16.9041	18.0924	19.5596	19.2004	13.9745	20.1206	16.013	19.5374	17.606	20.4291	21.6791	16.9449	18.5698	17.4788	17.3913
DO107	16.4705	17.7306	19.3017	18.9718	14.1691	19.9191	16.2561	19.5314	17.5332	20.3614	21.471	16.8006	18.3642	17.0387	17.0715
DO108	16.7567	18.163	19.9703	19.6775	14.5041	20.3497	16.3064	19.9195	17.9209	20.3859	21.847	16.7344	18.2747	17.5136	18.3973
DO109	15.9849	17.4206	19.6061	19.2381	13.916	19.9297	15.763	19.511	17.3245	20.0946	21.5404	16.5432	18.4352	16.8635	18.0332
DO111	15.6557	17.2956	19.2845	18.7863	14.9269	19.9134	16.1954	19.3474	17.2498	20.2647	21.5949	16.9452	18.2862	17.324	16.8201
DO112	16.8173	17.9652	19.3411	18.9461	15.119	19.9947	16.1116	19.6002	17.6218	20.3419	21.4307	17.0582	18.3831	17.3562	17.0064
DO113	16.88	18.0968	19.6408	19.3601	14.4899	20.2662	16.3958	19.8663	17.9717	20.6515	21.8843	16.8931	18.6035	17.3538	17.3303
DO114	16.6121	18.1017	19.6684	19.3038	14.2303	20.2364	15.9605	19.6544	17.6626	20.52	21.7781	16.9988	18.6928	17.3281	17.7337
DO115	17.3437	18.3775	19.8207	19.5519	14.2431	20.295	15.9136	19.8371	17.8719	20.3483	21.7274	16.7094	18.1947	17.3934	18.2959
DO116	17.1546	18.0153	19.394	19.0981	15.208	19.8034	15.8849	19.3274	17.1834	20.0516	21.3509	16.6122	17.7342	16.9979	17.4176
DO118	16.8725	17.7079	19.5455	19.1141	14.3752	19.9908	11.4377	19.6211	17.8316	20.4635	21.5335	10.5724	18.8691	17.9047	17.4587
DO119	16.2509	17.0386	18.7396	18.3653	14.179	19.4825	11.0662	19.0823	17.3847	19.9683	21.1947	10.6684	18.0719	17.4779	16.4401
DO120	17.3056	18.6079	20.2206	20.2192	14.6615	21.0264	16.4842	20.6449	18.7932	20.8553	22.2541	17.2495	18.6525	18.1916	19.3603
DO121	16.0312	17.2384	19.256	18.7961	14.0917	19.601	15.6232	19.0248	16.8182	19.9336	21.2301	16.5243	17.599	16.8542	17.3933
DO123	16.5579	17.5913	19.1087	19.0346	14.7218	20.1277	16.6288	19.5609	17.5026	20.4583	21.5789	16.8437	18.5152	17.4625	17.0098
DO124	16.7463	18.1752	19.9785	19.6248	14.1419	20.222	15.8475	19.8071	17.9208	20.389	21.7943	16.9387	18.2118	17.3062	18.5891
DO125	16.6842	17.6143	18.8231	18.3369	14.8069	19.4559	16.2615	18.9969	17.0341	19.7987	21.0117	16.7142	17.9694	17.0236	16.0947
DO126	16.4575	17.8239	19.1076	18.7674	14.5212	19.7858	15.8195	19.5505	17.5786	20.2365	21.3963	16.8912	18.2958	17.234	16.7652
DO128	16.7155	18.581	19.9681	20.2344	14.3591	20.708	15.7737	20.1432	18.2957	20.6896	21.8212	10.5627	19.2685	18.9086	19.0662
DO129	17.3752	18.4556	19.6082	19.5802	14.05	20.031	16.041	19.4221	17.5558	20.3357	21.6142	10.7473	18.8359	18.3766	17.4521
DO130	17.2052	17.9508	19.3617	19.1389	14.5357	19.9504	15.8855	19.7478	17.6701	20.1563	21.309	16.6422	17.7768	17.1588	17.4717
DO131	16.6999	18.0823	19.568	19.4148	14.524	19.9516	15.8496	19.4273	17.2555	20.0757	21.5029	16.7733	18.4018	17.1044	17.6964
DO132	16.4469	17.9847	19.5446	19.3378	14.6892	19.9442	15.8691	19.5708	17.3952	20.2176	21.4464	16.7881	18.4815	17.1832	17.6243
DO133	17.2225	18.3548	19.6099	19.3473	14.8942	19.914	16.0136	19.7413	17.607	20.2561	21.5244	16.7506	18.4856	17.106	17.6672
DO137	16.4605	17.64	19.2438	19.2615	13.87	19.8033	16.0194	19.3718	17.513	20.1393	21.2479	9.50073	18.5901	18.1398	17.2924
DO138	16.5413	17.9027	19.4532	18.8378	14.4513	19.7712	15.7876	19.4583	17.5398	20.2206	21.5157	16.9146	18.4151	17.0928	16.976
DO140	16.6309	17.8293	19.4071	19.2023	14.0826	19.8612	15.8137	19.4948	17.4535	20.0937	21.3916	16.5028	17.8172	17.052	17.924
DO141	16.7924	17.8709	19.3764	19.211	14.9242	19.8741	15.8849	19.3899	17.1944	20.1254	21.3718	16.6099	17.8015	16.9785	17.6331
DO142	16.1306	17.1917	19.1465	18.9026	14.8193	19.7339	16.3753	19.3402	17.185	19.982	21.2088	16.6705	18.2428	16.9557	17.1213
DO143	16.6807	17.7487	19.2619	19.3172	14.2476	19.9034	15.7146	19.3924	17.5315	20.0709	21.2435	11.0498	18.5741	18.0386	17.2027
DO144	16.9704	18.475	19.6457	19.8512	14.0521	20.2751	15.902	19.8146	17.9585	20.5759	21.7634	9.38587	19.0795	18.6319	18.3351
DO145	17.0408	18.336	19.4101	19.1824	14.8434	19.8756	10.6854	19.4146	17.3597	20.0986	21.4705	17.0485	18.4521	17.3821	18.0007
DO146	16.2283	17.631	19.7365	19.462	14.4565	20.1715	16.2701	19.7537	17.6401	20.3989	21.7562	16.7041	18.8095	17.2151	18.2769
DO147	17.4388	18.1031	19.5923	19.1508	14.6932	19.91	16.3149	19.3776	17.4616	20.2884	21.8397	16.9078	17.9899	17.2922	17.7091
DO148	16.3573	17.9471	19.7519	19.5536	14.4492	20.638	15.9457	20.0585	18.1662	20.5881	21.9541	17.1879	18.8021	17.7985	18.9181
DO149	16.8661	18.2601	19.7998	19.5326	14.6798	20.0415	16.4084	19.7434	17.7082	20.3113	21.6422	16.7672	18.69	17.5232	17.9863
DO150	17.4459	18.9032	20.2337	20.3692	14.766	21.0061	10.835	20.5122	18.5517	20.9069	22.1362	17.2376	19.1536	17.9434	19.2895
DO151	16.4268	18.198	19.8821	19.7365	14.3592	20.6022	15.8516	19.8303	17.836	20.4749	21.7802	17.2379	18.7882	17.6	18.9798
DO152	16.8713	18.0944	19.2968	19.2604	14.4347	19.9004	16.0878	19.5606	17.4813	20.1732	21.4727	16.5439	18.2425	17.0126	17.4542
DO153	17.0904	18.2732	19.355	19.1737	14.6059	19.7843	15.8267	19.4012	17.2466	20.0664	21.3525	16.5638	18.3457	16.9969	17.4887
DO154	16.2732	17.3228	19.2159	19.1398	14.805	19.873	11.3355	19.5335	17.407	20.1541	21.2307	16.9803	18.1814	17.2356	17.1957
DO155	16.9119	17.8709	19.1708	18.7735	14.2455	19.8658	16.113	19.4499	17.4602	20.2643	21.4104	16.7399	18.3104	17.126	16.9436
DO156	16.1456	17.5259	19.3067	19.0812	14.3363	19.8153	16.0967	19.2041	17.1176	19.9344	21.4108	16.5201	17.7662	17.0689	17.7795
DO157	17.2896	18.6414	19.6131	19.0148	14.6002	20.0137	15.85	19.5458	17.5176	20.3277	21.7045	16.9384	18.6626	17.2237	17.6518
DO158	16.3912	17.8316	19.1748	18.7201	14.5171	19.8359	15.8156	19.7056	17.7416	20.3798	21.4549	16.804	18.4375	17.1624	17.4181
DO159	16.5272	17.8634	19.5463	19.2921	15.0255	19.9667	16.5258	19.6948	17.5093	20.2909	21.5043	16.7662	17.9333	17.1641	17.4546
DO160	16.4579	17.5956	19.2775	18.8742	13.8444	19.9129	15.727	19.4208	17.4338	20.3007	21.5403	16.9317	18.2321	17.2472	17.2308
DO161	17.1246	18.4149	19.2113	18.7803	14.1483	19.8688	15.8185	19.3215	17.3551	20.2496	21.3725	16.8429	18.4538	17.1776	17.2036
DO162	16.9787	18.4569	19.75	19.3362	14.5066	20.2469	16.2822	19.5062	17.821	20.7048	21.7907	17.0488	18.78	17.3781	17.5851
DO163	16.3178	17.5366	19.5017	19.1481	15.1235	19.8326	15.9489	19.5287	17.3915	20.0053	21.2496	16.5972	18.2101	16.957	17.4065
DO164	17.2412	18.1046	19.3538	19.1479	14.8955	19.8408	11.4868	19.5861	17.5601	20.1042	21.4389	17.0862	18.3746	17.471	17.2743
DO165	17.4919	18.6193	19.7118	19.6267	14.8824	20.5358	11.1282	20.2037	18.232	20.6218	21.8332	10.543	19.0072	18.3505	19.2243
DO166	16.774	17.9039	19.6808	19.3751	14.247	19.9604	16.1256	19.7024	17.6655	20.2237	21.5954	16.8244	18.519	17.08	17.8665
DO167	16.3043	17.3515	19.7352	19.1091	14.2984	19.9005	11.1498	19.6284	17.7542	20.4208	21.6437	11.1034	18.9837	17.7679	17.4427
DO168	16.5541	17.7682	19.6538	19.688	13.5744	20.4102	10.6266	19.6986	17.6401	20.386	21.8133	17.1363	18.736	17.5778	18.8519
DO169	17.0828	18.1202	19.2121	19.0368	14.4246	19.9576	15.9895	19.3496	17.438	20.2399	21.6826	16.8959	18.5007	17.3535	17.6609
DO170	16.6906	17.8662	19.5688	19.2348	14.4065	19.9881	15.7771	19.582	17.425	20.2594	21.4049	16.7025	18.545	17.1011	17.7466
DO171	16.4167	17.5564	19.1811	18.6195	14.2397	19.6712	15.7479	19.4058	17.3862	20.1235	21.4135	16.7178	18.1746	17.0669	17.0062
DO172	16.1163	17.827	19.5836	19.1617	14.1277	20.1013	16.2028	19.682	17.7119	20.3996	21.7006	17.0176	18.6247	17.3938	17.0963
DO173	17.2483	18.2427	19.6772	19.6918	14.4031	20.1186	15.978	19.6063	17.7405	20.4689	21.6537	9.74889	18.8958	18.3498	17.491
DO174	16.5373	17.6444	19.1611	19.0682	14.326	19.7023	15.8828	19.369	17.2069	19.9455	21.2585	16.4812	17.6414	16.8894	17.0427
DO175	16.9207	17.7933	19.5071	19.1237	14.92	20.0549	16.826	19.571	17.4934	20.4227	21.6882	17.052	18.4131	17.4004	16.9122
DO176	17.5401	18.2975	19.8646	19.7949	13.5924	20.1278	16.0102	19.6186	17.7463	20.4096	21.697	9.12806	18.9121	18.3792	17.8363
DO177	16.8511	18.2299	19.6953	19.6386	13.7958	20.1847	15.8689	19.6166	17.5865	20.3998	21.5975	9.15955	18.9533	18.6763	17.8834
DO178	16.2394	17.4637	19.3623	19.0617	13.8567	20.1553	16.0928	19.6897	17.7889	20.4009	21.63	16.8012	18.4135	17.3197	17.6602
DO179	16.6707	17.8328	19.4167	19.4291	13.4687	19.8767	15.7248	19.6295	17.8242	20.1711	21.4164	8.7967	18.6232	18.1119	17.4143
DO180	16.9407	17.7877	19.8254	19.552	14.5361	20.2444	16.1075	19.5609	17.4015	20.3123	21.7578	16.9186	18.6884	17.3293	18.187
DO181	16.7771	17.7184	19.1746	18.7889	14.2961	19.7403	15.9407	19.1618	17.1723	20.1604	21.4286	16.7751	18.3442	17.0381	16.6846
DO182	16.8087	18.4608	20.2335	20.1684	14.3727	20.8922	10.8285	20.3474	18.3514	20.6079	21.9329	17.2349	19.0454	17.8674	19.0288
DO183	17.3323	19.0998	20.2628	20.2909	14.634	20.8039	10.8998	20.3239	18.389	20.6668	22.0482	17.7047	19.121	18.1539	19.4525
DO184	16.3255	17.7151	19.5768	19.2405	14.7569	20.0941	16.292	19.8498	17.6567	20.3458	21.6405	16.8609	17.9577	17.1542	17.5334
DO185	16.8111	17.9012	19.2232	18.8991	14.3104	19.7377	16.2905	19.1972	17.2368	20.1871	21.5414	16.8448	18.3412	17.2909	17.2177
DO186	16.9825	18.2667	20.058	20.0486	13.5824	20.3326	16.0376	19.8054	17.9689	20.6021	21.8502	9.31789	18.9983	18.65	18.2773
DO187	16.5595	17.7942	19.7821	19.4007	14.4025	20.1186	16.0583	19.8161	17.7185	20.329	21.7168	16.6963	18.589	17.1382	17.8811
DO188	17.0958	18.3728	19.8803	19.4953	14.3833	20.2151	16.223	19.8512	17.848	20.4846	21.6691	16.7992	18.1962	17.2776	18.1914
DO189	16.6012	17.5515	18.7045	18.457	14.0948	19.3253	11.0249	18.9758	16.9497	19.5553	21.0765	16.7507	17.951	17.0815	16.8613
DO190	16.4248	17.3935	19.4794	19.0326	14.2849	19.9958	11.1905	19.3238	17.4154	20.1651	21.4334	10.1279	18.8177	17.9432	17.6772
DO191	16.6472	17.5671	18.7847	18.3697	13.9699	19.4013	15.2879	19.1081	17.2003	19.8542	21.1135	16.5661	17.8992	16.7681	16.4096
DO192	16.3457	17.5458	19.3185	19.1175	14.5512	20.2428	16.248	19.6069	17.538	20.4431	21.6454	16.8995	18.4255	17.2959	17.1441
DO193	17.2155	18.3499	19.9495	19.7384	14.3083	20.4292	16.3368	19.8984	17.921	20.3917	21.8545	16.7147	18.8308	17.3768	18.7361
DO194	16.7195	17.8965	19.3641	19.1082	14.7394	19.7127	15.5992	19.239	16.9888	19.9794	21.2077	16.6058	18.1989	16.8816	17.2548
DO195	16.7467	18.0009	19.6925	17.6905	14.7737	19.6632	10.6946	18.3889	16.7628	20.1902	21.4708	11.3142	19.0424	17.7659	16.8664
DO196	16.183	17.3611	19.5937	19.6993	13.7691	20.0703	15.6281	19.4499	17.5271	20.1901	21.4731	9.35882	18.6466	18.2826	17.7996
DO197	17.1148	18.2098	19.9951	19.818	14.7998	20.8219	12.0223	20.4042	18.3704	20.9304	22.1425	10.7408	19.1427	18.4614	18.6076
DO199	16.5903	17.7809	19.3758	19.2094	14.3425	19.8534	16.0667	19.5768	17.4644	20.0783	21.4404	16.4951	17.7404	16.9567	17.4871
DO200	16.9834	18.279	19.8101	19.5413	14.5333	20.2377	16.4906	19.8811	17.7304	20.4688	21.8934	16.7588	18.0967	17.2955	17.9103
DO201	15.735	17.2472	19.2323	18.8818	14.5311	20.0052	16.157	19.4412	17.4042	20.3586	21.6491	16.8474	18.4398	17.2699	16.7879
DO202	16.5233	17.4361	19.2633	18.9951	14.6431	19.9469	16.0987	19.497	17.4163	20.2564	21.5487	16.8399	18.3365	17.1577	17.473
DO203	17.4318	18.2696	19.4734	19.6728	13.9539	20.185	15.6754	19.7456	17.8698	20.3731	21.4879	9.27053	18.7897	18.4099	17.7559
DO204	17.2555	18.5695	19.7497	19.4	14.5773	19.9675	16.0918	19.3789	17.2339	20.041	21.6211	16.7688	18.6588	17.0365	17.6078
DO205	17.1754	18.2958	19.7199	19.2522	14.2881	20.3472	16.0346	19.7914	17.8997	20.6348	21.8833	16.9894	18.8065	17.455	18.2798
DO206	16.999	17.8777	19.2544	18.8037	14.8666	19.8236	11.1044	19.5581	17.7764	20.2426	21.3485	11.3012	18.573	17.7732	16.9517
DO207	16.8111	17.7715	19.3097	18.6668	14.2309	19.6112	11.0182	19.1768	17.3384	20.0662	21.302	10.6068	18.5899	17.5696	17.2531
DO208	17.0147	17.6078	19.1548	18.6503	14.6885	19.5861	10.8259	19.3336	17.5333	20.0459	21.2342	10.6021	18.5027	17.6128	16.8485
DO209	16.6712	17.9757	19.511	19.099	14.1701	20.1012	15.8121	19.6593	17.7432	20.277	21.5887	16.9426	18.3941	17.3127	17.4352
DO210	16.6995	18.2144	19.6413	19.4413	14.5563	20.3721	16.2724	19.6432	17.6283	20.5959	21.9707	16.8451	18.6971	17.5088	18.1616
DO211	16.287	17.6168	19.5903	19.3405	15.3546	20.1231	16.0677	19.5813	17.3517	20.2427	21.7322	16.7564	17.9827	17.2258	17.7287
DO212	17.1655	18.022	19.8688	19.7314	14.1135	20.484	15.9657	19.774	17.776	20.4139	21.7589	16.7006	18.9623	17.5061	18.4073
DO213	15.947	17.4816	19.6316	19.4873	14.5481	20.3247	16.3615	19.8201	17.7557	20.6308	21.7964	16.9167	18.6726	17.3484	17.9233
DO214	16.4407	17.712	19.3138	18.9958	14.8684	20.0778	16.7599	19.5884	17.6033	20.3874	21.6573	17.0162	18.4341	17.4916	16.8644
DO215	16.977	18.0959	19.495	19.1223	14.3786	20.0234	16.0712	19.6852	17.7688	20.4035	21.6569	16.9444	18.6203	17.4209	17.0438
DO216	16.1726	17.6069	19.1914	19.0227	14.556	19.899	16.0377	19.3016	17.222	20.1169	21.4739	16.866	18.2644	17.2221	16.8906
DO217	16.4669	17.841	19.2692	18.9902	14.8538	19.7958	11.1755	19.5553	17.5052	20.1337	21.314	17.0659	18.3314	17.2759	17.0887
DO218	16.7531	17.9607	19.1864	18.8707	14.7401	19.6778	11.0711	19.4714	17.4792	19.9263	21.2161	16.9879	18.2459	17.19	16.9861
DO219	17.1708	18.194	19.6485	19.2868	14.8237	20.0673	16.342	19.5948	17.4736	20.3688	21.6307	16.8744	18.1236	17.2879	17.757
DO220	17.0967	18.5721	19.2276	19.6131	15.1579	20.6296	10.9616	20.2837	18.259	20.6615	21.8934	10.6728	18.62	18.2904	18.999
DO221	16.1404	17.3191	19.1742	18.8853	14.1431	19.6538	10.5819	19.2345	17.0649	20.0095	21.1887	16.865	18.1618	17.0533	17.4014
DO222	16.7291	17.676	19.3724	19.1392	14.7748	19.8235	15.8318	19.7353	17.6409	20.1304	21.3545	16.5585	18.3289	17.0618	17.7791
DO223	16.6305	18.1402	19.569	19.3237	14.8103	19.9993	16.5749	19.4655	17.2548	20.2414	21.5132	16.8015	17.9533	17.2694	17.4857
DO224	16.5355	17.9103	19.6007	19.2675	14.1561	20.3994	15.6708	19.7011	17.7288	20.3553	21.8226	17.122	18.7464	17.5251	18.8525
DO225	17.0187	18.3224	19.7199	19.4544	14.056	20.1275	15.9493	19.8366	17.8372	20.1427	21.6692	16.584	18.7983	17.4455	18.5504
DO226	16.5159	17.2813	19.0531	18.4061	14.315	19.5424	11.1629	19.228	17.3835	19.8981	21.0319	10.0647	18.3671	17.4927	16.7067
DO227	16.374	17.6961	19.4294	19.2151	14.3837	19.9253	10.9896	19.4569	17.3468	20.1523	21.5545	17.2452	17.8738	16.89	17.8565
DO228	16.4552	17.6206	19.2204	18.8921	14.1811	19.6597	15.9113	19.1388	17.0105	19.9186	21.2121	16.6108	18.1787	16.73	17.284
DO229	16.4321	17.85	19.5375	19.1387	14.3675	20.1281	16.2829	19.8077	17.7816	20.5586	21.628	16.8871	18.5476	17.1855	17.2532
DO230	16.5462	17.5814	19.0222	18.834	14.3625	19.5617	10.8905	19.2693	17.18	19.8843	21.1153	16.8858	18.047	17.1526	17.2978
DO231	16.7211	17.6833	19.2858	18.8935	14.7573	19.7544	15.8128	19.2877	17.4326	19.9052	21.0994	11.1744	18.4162	17.9211	17.2975
DO232	17.1644	18.8123	20.1646	20.2331	14.4723	20.8827	15.8524	20.3491	18.3573	20.6888	21.9206	17.107	18.5779	17.8893	19.0342
DO233	16.8307	18.2296	19.7018	19.3948	14.4876	20.1121	10.765	19.5474	17.4518	20.1378	21.7286	16.8522	18.7071	17.4484	18.7128
DO234	16.7411	17.7961	19.4775	19.2482	14.3816	20.0238	16.3058	19.6503	17.5938	20.2402	21.4285	16.7156	18.4222	17.0304	17.6547
DO235	16.6927	17.964	19.4559	19.1624	14.5119	19.9138	10.9776	19.5149	17.4482	20.1841	21.4498	17.1385	18.4193	17.37	17.5724
DO236	17.0267	18.0397	19.4442	19.1158	14.6245	19.8617	16.0909	19.4086	17.3403	20.0902	21.328	16.7456	17.8402	17.1949	17.6681
DO237	16.4768	17.9343	19.3611	18.7865	14.0295	19.86	15.7122	19.3758	17.405	20.2849	21.514	16.8225	18.4134	17.051	17.2221
DO238	16.4661	17.6701	19.1509	18.8127	14.4736	19.8458	16.1275	19.4327	17.4484	20.2842	21.4462	16.822	18.2697	17.1748	16.6216
DO239	16.8323	18.4037	19.8105	19.634	14.2096	20.5853	15.6855	20.0733	18.2243	20.5078	21.8631	17.3791	18.8406	17.7356	19.0311
DO240	16.1973	18.0378	20.0668	20.0207	14.6009	20.6742	15.9355	20.082	18.0778	20.4802	21.8682	17.1913	18.3927	17.7881	19.1864
DO241	16.7985	17.5705	19.8404	19.9443	13.7632	20.4097	16.704	19.7711	17.8835	20.4409	21.6889	9.21808	18.9965	18.5946	17.8967
DO242	17.0853	18.302	19.6404	19.6163	13.7102	20.1087	15.7129	19.5595	17.7383	20.2206	21.4722	9.57408	18.7998	18.4835	17.8647
DO243	16.2648	17.7329	19.2035	18.7543	14.2039	19.867	15.4846	19.4568	17.4733	20.1849	21.4503	16.8171	18.3934	17.237	17.542
DO244	16.1399	17.1738	19.2515	18.8401	14.2161	19.9506	16.1542	19.3684	17.4275	20.3366	21.7075	16.8325	18.4399	17.1976	16.8652
DO245	16.612	17.4954	19.1312	18.7083	14.2941	19.5533	15.8561	19.101	16.9812	19.8563	21.0903	16.5641	18.0421	16.77	16.8809
DO246	16.8954	17.783	18.9779	18.5453	14.4861	19.6584	15.9473	19.2789	17.2027	20.0283	21.2868	16.8676	18.0639	17.0196	16.593
DO247	16.6954	17.9984	19.0539	18.8226	14.4893	19.6709	11.1616	19.4517	17.3723	19.9344	21.1203	16.8663	18.083	17.236	17.1096
DO248	16.81	17.9076	19.0497	18.8574	14.9083	19.6352	11.3909	19.1428	16.9789	19.8796	21.1557	16.921	18.0855	17.175	17.0639
DO249	16.4816	17.7124	19.5587	19.2198	14.1078	20.2419	16.0186	19.7103	17.7509	20.4881	21.7727	16.9536	18.7102	17.3676	17.8716
DO250	16.7034	17.704	18.9062	18.3168	14.8683	19.6573	15.9187	19.3509	17.3983	20.0763	21.4407	16.9835	18.1674	17.2209	16.549
DO251	16.0523	17.5915	19.5528	19.4654	13.7714	19.9352	15.7816	19.5074	17.6361	20.249	21.3977	9.24984	18.7586	18.1782	17.6361
DO252	16.7412	18.0508	19.6586	19.3348	14.6637	20.1433	16.2579	19.7075	17.6884	20.3553	21.6287	16.8058	18.0251	17.334	17.9296
DO253	16.616	18.3769	20.0693	20.1792	14.5121	21.2345	16.0927	20.644	18.6375	21.0222	22.2186	17.3131	19.0455	17.916	19.0804
DO254	16.7723	18.0947	19.6077	19.4875	14.3378	20.4164	16.2921	19.6473	17.7139	20.5574	21.6276	16.9707	18.8001	17.5547	18.3858
DO255	16.6226	18.0228	19.4029	19.1658	14.5005	19.9286	15.8964	19.592	17.4629	20.17	21.5687	16.6664	18.4208	17.0258	18.0058
DO256	16.2626	16.972	19.2674	18.6276	14.3401	19.6424	11.2906	19.29	17.4332	20.1004	21.233	10.7972	18.6793	17.6466	16.7407
DO257	16.3602	17.7392	19.3667	19.304	13.7	19.8354	15.8003	19.3158	17.4972	20.1323	21.3605	9.58728	18.5808	18.1168	17.2376
DO258	16.2855	17.508	19.2806	18.9981	14.3436	20.005	16.194	19.4324	17.3887	20.387	21.6939	16.8105	18.4131	17.2701	17.1078
DO259	16.4282	17.6023	19.2453	18.9028	13.8743	19.5477	15.6721	19.1117	17.2189	19.8768	21.2851	9.09458	18.3811	17.9454	16.9166
DO260	16.8835	17.7162	19.6861	19.0638	14.5818	19.9176	11.5867	19.4433	17.5885	20.3203	21.4566	11.0299	18.8784	17.8518	17.2077
DO261	16.4422	17.4766	18.8655	18.52	14.0262	19.3998	15.6163	19.0919	16.9511	19.7479	20.9434	16.3232	17.8555	16.5422	16.9961
DO262	16.6896	17.9975	19.6051	19.5575	14.468	20.1072	16.1671	19.5147	17.382	20.3072	21.6851	16.6322	17.9905	17.2896	18.1832
DO263	17.1086	18.1372	19.495	19.185	14.2802	20.0281	15.961	19.9289	17.9229	20.3052	21.5274	16.5624	18.6213	17.2348	18.0318
DO264	16.4435	17.6946	19.2192	18.8286	14.9317	19.6395	15.9767	19.1475	16.9848	19.7854	21.1687	16.5715	17.6379	16.8515	17.0744
DO265	16.7886	17.4982	18.6482	18.2378	14.5461	19.485	16.2092	19.0203	17.0653	19.866	20.9855	16.7475	18.0044	16.9789	16.2214
DO266	16.5559	17.6827	19.4208	19.1214	14.5652	19.7572	16.0128	19.3338	17.1194	19.9159	21.346	16.6105	18.1988	16.9039	17.4558
DO268	16.8395	17.844	19.1551	19.0565	14.4367	19.7098	15.6712	19.2029	16.9718	20.0346	21.3734	16.6013	17.6342	16.9383	17.3848
DO269	16.563	17.2208	19.6302	19.083	14.2094	20.0814	11.5241	19.6297	17.6624	20.4443	21.6689	10.0787	18.842	17.8891	18.0359
DO270	17.1358	18.4811	20.0541	19.9754	14.7485	20.6567	16.4689	20.1732	18.1935	20.5434	21.9961	16.9107	18.4504	17.7275	19.0294
DO271	16.4005	17.5551	19.317	18.9781	14.4066	19.8097	15.9779	19.5176	17.3997	20.1058	21.411	16.6619	17.7817	17.1113	17.2609
DO272	17.0013	17.864	19.0575	18.7185	15.0074	19.8905	16.2217	19.4555	17.4223	20.2532	21.4763	16.8868	18.2904	17.2844	16.7551
DO273	16.509	18.4426	19.9672	19.9245	13.8347	20.6546	15.4279	19.9977	17.9854	20.3961	21.8452	9.52646	19.097	18.9361	18.9368
DO274	16.9812	18.1418	19.7576	19.8299	14.2807	20.3811	10.9562	19.8297	17.8285	20.4019	21.5345	17.1822	18.5192	17.654	18.0128
DO275	16.0232	17.2423	19.3541	19.1935	14.0742	19.8287	15.6481	19.173	17.0871	19.893	21.3832	16.5099	17.8529	17.0612	17.5632
DO276	16.7889	18.0081	19.7273	19.4029	14.9388	20.0335	15.9563	19.6095	17.5466	20.2926	21.8313	17.0214	18.6545	17.2765	17.7251
DO277	16.308	17.6305	19.722	19.4086	14.2391	20.1538	16.0178	19.5901	17.5852	20.0961	21.6524	16.7323	18.1518	17.2433	18.4284
DO278	16.9242	17.7493	19.798	19.5687	14.4427	20.1638	16.2225	19.6009	17.5367	20.3501	21.8101	16.8655	18.2531	17.3301	18.3254
DO279	17.1065	18.1309	19.4809	19.3007	14.5043	20.0313	11.122	19.6556	17.6049	20.3439	21.5594	17.0489	18.5508	17.5195	17.5466
DO280	16.5778	17.1043	18.9791	18.2858	14.6838	19.3418	10.9605	18.7833	17.0277	19.8163	20.9631	10.6482	18.4793	17.4488	16.4144
DO281	15.9516	17.2926	19.7326	19.308	13.9612	20.0954	15.9014	19.4675	17.5197	20.0733	21.5462	16.5996	18.5568	17.0384	18.207
DO282	16.1239	17.6821	19.3157	18.8486	14.2778	19.8319	16.0781	19.4764	17.4939	20.1874	21.497	16.8687	18.2497	17.0462	16.8753
DO283	16.4442	17.4509	19.209	18.9121	13.7284	19.738	10.6595	19.0747	17.0055	19.9045	21.2711	17.0988	17.7601	16.8608	17.627
DO284	16.5528	17.521	19.051	18.6252	14.5086	19.7118	16.4383	19.3554	17.4131	20.0912	21.3169	16.7544	18.1204	17.0918	16.3542
DO285	16.9601	18.1261	19.7194	19.4077	14.2887	20.2678	16.2559	19.7626	17.832	20.3113	21.6673	16.8835	18.095	17.4525	18.2651
DO286	16.9292	18.0015	20.1576	19.9575	14.2267	20.5675	16.3006	19.9118	17.8946	20.5547	22.0259	17.0326	18.566	17.5899	18.652
DO287	16.8221	18.2049	19.7608	19.5258	14.4286	20.1467	15.8932	19.5503	17.4422	20.217	21.75	16.7828	18.7421	17.2588	18.3032
DO288	16.3988	17.9213	19.5298	19.2594	13.9326	20.2657	15.7794	19.5895	17.5858	20.3372	21.7034	16.8863	18.5443	17.3933	18.2186
DO289	17.2767	18.924	20.3915	20.695	14.4467	21.6382	16.1285	21.0384	19.0284	21.3561	22.4909	17.3034	19.3491	18.3263	19.4883
DO290	16.5537	17.8417	19.5289	19.3175	14.459	20.3102	16.674	19.7902	17.8543	20.6285	21.8694	16.966	18.6943	17.4311	17.458
DO291	16.8324	17.9432	19.8092	19.6236	14.93	20.3104	16.1992	19.855	17.6942	20.5043	21.8087	16.9809	18.2207	17.3718	17.9502
DO292	17.5113	18.1231	19.6565	19.8367	13.5463	20.2307	15.8886	19.659	17.8971	20.3961	21.6242	9.27996	18.9355	18.5483	17.8957
DO293	16.1482	17.2861	19.2659	18.534	14.0419	19.7019	10.9036	19.2955	17.4232	20.1544	21.398	10.4461	18.6327	17.682	17.0244
DO294	16.7248	17.6637	19.5686	19.287	14.6599	20.0407	16.1746	19.4933	17.3708	20.1538	21.6024	16.682	18.3961	17.1179	17.7088
DO295	16.3377	17.3747	19.4152	18.738	13.6336	19.8719	16.0873	19.3572	17.4364	20.2652	21.7191	16.7665	18.4575	17.0555	17.1621
DO296	16.1318	17.363	19.1882	19.0149	14.4047	19.9767	16.0889	19.4205	17.383	20.3664	21.5443	16.8103	18.421	17.3576	16.9079
DO297	16.1274	17.3032	19.2589	19.0135	14.2919	19.6857	15.6413	19.1927	17.0086	19.8859	21.3439	16.6067	17.6477	16.9326	17.258
DO298	16.717	17.9078	19.3078	18.9096	14.0826	19.6471	15.9111	19.3478	17.1728	19.8646	21.4148	16.6861	18.15	16.7618	17.2295
DO299	16.4926	17.5976	19.291	18.9924	14.7996	19.7741	15.9481	19.4673	17.3187	20.0549	21.3678	16.5495	17.7004	16.9919	17.1026
DO300	16.5826	18.0175	19.5055	19.4211	14.9798	19.9229	11.2941	19.4525	17.3908	20.1764	21.5855	17.2964	17.7805	17.0201	17.5034
DO301	16.0691	17.2267	19.027	18.7908	14.0229	19.5831	15.6173	19.2731	17.1483	19.8802	21.1839	16.3714	18.1231	16.8932	17.0038
DO302	16.493	17.5808	19.3814	19.2484	14.3353	19.8754	15.7857	19.4386	17.6039	20.0497	21.4129	10.6784	18.5861	18.0852	17.2619
DO303	16.5106	17.4856	19.8128	19.8093	13.7555	20.2509	15.7978	19.7836	17.7893	20.4346	21.7327	9.1356	18.9153	18.402	18.076
DO304	16.2624	17.4029	19.2391	18.9862	14.658	19.6842	11.599	19.1878	17.0067	19.8914	21.2508	17.206	17.6359	16.8355	17.0761
DO305	17.3593	18.3971	19.4844	19.0869	14.0628	19.7475	15.8935	19.4021	17.3797	19.9374	21.4544	16.5254	17.8466	16.8343	17.6652
DO306	16.2006	17.4095	19.2675	18.9778	14.6227	19.6871	15.6655	19.3098	17.2097	19.8886	21.2793	16.5	17.6966	16.875	17.2334
DO307	16.6531	17.7746	19.3679	19.0966	14.1258	19.8767	15.9869	19.3622	17.2046	20.1513	21.4579	16.5118	18.45	16.9333	17.6369
DO048	16.0139	17.4715	19.3551	19.1238	14.8632	19.8174	15.9675	19.6475	17.5776	20.0935	21.2588	16.5566	17.7338	16.9899	17.32
DO310	16.4285	17.6008	19.2755	19.3723	13.7554	19.8431	16.2284	19.2545	17.3971	20.0659	21.294	9.17316	18.6503	18.1409	17.0977
DO309	16.9293	18.1135	19.6087	19.3987	14.1032	20.1125	16.1819	19.5821	17.4504	20.294	21.6806	16.7867	18.8389	17.3245	17.7432
DO311	16.6701	17.6553	19.4202	19.1023	14.0867	19.8506	10.9659	19.4758	17.4382	20.1188	21.4864	16.9239	18.3005	17.2011	17.6759
DO312	17.1325	18.0163	19.6472	19.3243	14.6504	20.0003	16.297	19.774	17.7203	20.1886	21.502	16.8301	18.4988	17.1903	17.5765
DO313	17.3045	18.0988	19.2559	19.1095	14.311	19.818	10.9366	19.1685	17.038	19.9658	21.3262	16.9527	18.1581	17.2586	17.4682
DO314	17.5389	18.795	20.0723	20.1462	14.2429	20.8168	10.7574	20.3785	18.4136	20.5118	21.9957	17.1408	18.9011	17.7471	18.9079
DO315	16.2969	17.6565	19.5882	19.3104	14.6206	19.9674	15.798	19.5578	17.3928	20.1994	21.5746	16.5474	18.4569	16.8853	18.1563
DO316	16.5574	17.5651	19.2321	18.9881	14.218	19.8806	16.006	19.2389	17.309	20.1458	21.5331	16.7215	18.3933	17.2094	17.0267
DO317	16.2853	17.7615	19.4314	19.0653	14.2029	20.0296	16.0342	19.5219	17.457	20.4164	21.6891	16.7264	18.508	17.2257	17.6087
DO318	16.9113	18.0089	19.3744	19.2111	14.4905	19.8833	16.3995	19.281	17.087	20.0344	21.31	16.6465	18.3837	17.0312	17.3291
DO319	16.4904	17.518	19.3477	19.113	13.881	19.723	15.5409	19.3122	17.4727	19.9141	21.2559	9.17674	18.3896	17.9106	17.0803
DO320	16.3244	17.71	19.5688	19.2056	14.1736	19.9491	16.2624	19.546	17.4671	20.1316	21.5585	16.5644	18.3662	16.999	17.6853
DO321	16.6757	17.8566	19.708	19.5977	13.5871	20.0759	15.9603	19.6134	17.6972	20.4361	21.5892	9.49014	18.7715	18.2474	17.71
DO323	16.3691	17.7553	19.1069	18.8086	14.3681	19.6882	11.2244	19.1743	17.0625	19.888	21.2082	17.1318	17.4082	16.6749	17.4424
DO324	16.2801	17.7191	19.3728	19.0891	14.4397	19.8593	16.0619	19.4813	17.3534	20.1493	21.4063	16.6551	17.9018	17.147	17.4126
DO325	16.5171	17.5965	19.364	19.2927	13.85	19.8347	16.147	19.3474	17.609	19.9456	21.3867	8.98455	18.5504	18.3197	17.4272
DO326	17.467	18.7407	20.3263	20.3034	14.7678	21.0947	15.7721	20.5327	18.598	20.9441	22.2736	17.1046	19.4259	17.7118	19.4198
DO327	16.5877	17.6242	18.9506	18.492	14.5901	19.5014	15.7289	19.0294	17.1185	19.8924	21.1352	16.8395	18.0567	17.1005	16.4911
DO328	16.5926	17.6537	18.8364	18.4825	14.8154	19.546	15.7829	18.9682	17.0153	19.8846	21.0529	16.8092	17.9938	17.0749	16.6027
DO329	17.0926	18.0908	19.5553	19.2861	14.2264	20.0637	10.7246	19.4696	17.3535	20.2694	21.5526	17.0744	18.4112	17.3665	17.9173
DO330	16.9384	17.6225	19.0637	18.857	14.6167	19.6376	15.8088	19.019	16.8208	20.0046	21.2084	16.6063	18.1681	16.8968	17.1622
DO331	16.895	18.0231	19.2625	19.0817	14.3718	19.7323	15.755	19.3576	17.2009	19.9919	21.385	16.4447	17.6712	16.9012	17.7705
DO332	16.69	17.8187	19.0604	18.5919	13.9427	19.7017	15.7875	19.1768	17.1829	20.0165	21.3541	16.6412	18.1852	16.9706	17.2236
DO333	16.5597	17.7316	19.0597	18.8357	14.8168	19.5159	11.0636	19.0805	17.1428	19.6409	20.9364	17.0419	17.3193	16.6075	17.0599
DO335	16.7796	17.7792	19.3614	19.1335	14.3955	19.9866	11.2954	19.6975	17.8075	20.548	21.4812	10.2509	18.6657	17.8881	17.9028
DO336	17.5452	18.3042	19.2385	18.8333	14.4878	19.6016	15.7664	19.3405	17.2925	20.0765	21.3088	16.6556	18.2604	16.9878	17.1973
DO337	16.8521	17.7625	19.2304	19.0171	14.6289	19.6935	16.0746	19.1876	16.9997	19.9681	21.2325	16.5467	17.6761	16.9221	17.2596
DO338	17.1647	17.9963	19.3677	19.0219	14.4783	19.6919	16.0112	19.5	17.3471	20.0296	21.2531	16.5758	17.6607	16.8186	17.1893
DO339	15.9479	17.0361	18.8434	18.5068	14.2512	19.2633	10.9641	18.8124	16.6813	19.5507	20.7481	16.7152	17.7853	16.9457	16.7733
DO340	17.0405	18.6942	19.9844	19.8633	14.5719	20.5128	15.9795	20.1883	18.2789	20.4664	21.836	17.078	18.2356	17.6687	18.9907
DO342	16.6416	17.8412	19.3212	19.1158	14.9445	19.8064	16.2927	19.4596	17.2591	20.0754	21.3872	16.6005	17.7592	16.9599	17.2982
DO343	16.4304	17.4826	19.248	18.7571	14.1263	19.8451	16.2219	19.3284	17.3893	20.2266	21.4807	16.8034	18.3655	17.1043	17.1886
DO344	17.5118	18.4291	19.4264	18.8521	14.0162	19.9191	11.1804	19.5396	17.6538	20.3433	21.424	9.90177	18.7637	17.7969	17.6639
DO345	16.7363	17.776	18.8971	18.5344	14.1968	19.6501	15.9983	19.3121	17.3878	20.0875	21.2861	16.7859	18.1087	17.0992	16.8944
DO346	16.5072	17.6631	19.2583	18.8597	14.1451	19.9136	16.0655	19.4449	17.4831	20.3299	21.3969	16.9061	18.4364	17.2484	16.9448
DO347	16.3471	17.5883	19.3667	19.0079	13.5829	19.6832	15.6924	19.4555	17.6562	20.1076	21.4578	8.98549	18.5701	18.0549	17.2604
DO348	16.6309	18.1165	19.9505	19.6971	14.1657	20.5328	16.2214	20.0968	18.119	20.4753	21.9066	16.9022	19.0408	17.6547	18.9517
DO349	17.4451	18.2319	19.0707	19.0053	14.7012	19.7494	10.9274	19.4009	17.2615	20.067	21.419	16.9958	18.2259	17.2814	17.1997
DO350	17.5416	18.6974	19.9701	19.6367	14.5821	20.5271	16.3721	20.099	18.2119	20.5748	21.8578	17.1998	19.0229	17.8769	18.7952
DO352	16.5577	17.4424	18.9702	18.6001	13.8469	19.6189	15.895	19.0793	17.1175	19.9694	21.2618	16.6621	18.0883	17.0369	16.8217
DO353	16.1734	17.4503	19.0785	18.768	14.4211	19.5666	11.1943	19.3393	17.3092	19.8533	21.0495	16.857	18.0082	16.9973	17.0662
DO354	17.0712	18.2034	19.4477	19.4606	13.5599	19.9737	15.9173	19.6674	17.8682	20.3778	21.6058	9.05496	18.8198	18.3267	17.6256
DO355	16.7646	17.8994	19.2239	18.7991	14.1302	19.6424	15.8843	19.1689	17.0744	19.9962	21.3431	16.5651	17.6725	16.7528	17.3555
DO356	16.5452	17.8299	19.5462	19.4812	13.9836	19.898	15.9414	19.479	17.6046	20.2071	21.3357	9.16697	18.6476	18.1962	17.3728
DO357	16.7285	17.8431	19.181	18.8807	13.661	19.7895	15.8447	19.3871	17.354	20.0304	21.3264	16.5376	17.7402	17.0019	17.3755
DO358	16.3975	17.4728	19.4168	19.0199	14.3656	20.0477	16.05	19.6744	17.7195	20.5048	21.5482	16.8707	18.5951	17.4284	17.1596
DO359	16.663	18.1833	19.9012	19.8304	14.2333	20.4838	15.9007	19.8494	17.7475	20.406	21.7696	17.1088	18.2841	17.6008	18.9915
DO360	16.0805	17.2338	18.9611	18.6273	14.2445	19.7608	15.7585	19.1936	17.2165	20.0944	21.2729	16.6231	18.1929	17.1831	16.8291
DO361	16.0202	17.4595	19.2812	18.9406	14.0639	19.7395	10.7916	19.3591	17.3426	19.971	21.3625	17.0357	18.3187	17.3634	17.4148
DO362	16.1923	17.2951	19.0234	18.6971	13.9423	19.7264	15.9418	19.3027	17.3632	20.1338	21.2697	16.768	18.2177	17.0636	16.83
DO363	17.2106	18.3287	19.6857	19.6516	14.3538	20.236	16.096	19.6611	17.741	20.5591	21.731	9.66182	19.0111	18.6651	17.7987
DO364	16.6835	17.8047	19.0586	18.5012	14.2782	19.7055	16.0834	19.4001	17.4626	20.1455	21.3338	16.8612	18.1719	17.0002	16.7524
DO365	16.0681	17.3467	19.1108	18.9101	14.4911	19.6453	16.1945	19.2728	17.0585	19.8937	21.1521	16.5181	18.1178	16.9247	17.0528
DO366	16.475	17.9796	19.3977	18.904	14.4123	19.6299	10.3664	19.2744	17.3709	19.9018	21.278	17.0128	18.1461	17.125	17.8392
DO367	16.9892	17.7922	19.0802	18.6774	14.2445	19.6608	15.4481	19.143	17.2349	20.0237	21.3231	16.8136	18.1598	17.1291	16.7197
DO368	16.9244	17.9578	19.2098	18.8948	14.9223	19.6305	16.0357	19.4162	17.2643	20.0023	21.2817	16.5327	18.1838	16.9792	16.9596
DO369	16.2468	17.8275	19.3741	19.0593	14.3122	19.6663	15.8127	19.32	17.1551	19.8899	21.2239	16.5414	18.1794	16.849	17.2499
DO370	16.6531	17.8153	19.3048	19.0866	14.5015	19.9615	16.3381	19.541	17.3835	20.1726	21.3454	16.7034	18.4045	17.2114	17.4327
DO371	16.4572	17.8433	19.5564	19.4457	14.3889	20.1879	16.2661	20.0026	17.964	20.3609	21.6787	16.6556	18.6358	17.0852	18.0764
DO372	16.249	17.7519	19.8525	19.549	14.2953	20.3958	16.2734	19.7856	17.8045	20.6529	21.9793	16.9054	18.7531	17.393	18.1457
DO373	15.9488	17.494	19.6379	19.2439	14.9484	19.9602	15.9766	19.4962	17.3118	20.073	21.5119	16.7289	17.8094	16.996	17.4313
DO374	16.581	17.7407	19.4502	19.1686	14.7358	19.8215	10.7856	19.3672	17.3422	20.0978	21.4245	16.9986	18.4047	17.4441	17.332
DO375	16.9745	18.7014	19.874	19.9032	14.0553	20.6147	15.3093	20.159	18.2478	20.4373	21.8248	10.0453	19.1171	19.0327	18.9042
DO376	16.9648	18.1162	19.541	19.2069	14.6169	19.8204	16.1534	19.5167	17.3893	20.0765	21.5243	16.5967	18.3985	17.017	17.786
DO377	17.1178	18.4227	19.7392	19.8779	14.1306	20.2997	16.0667	19.917	18.0265	20.5721	21.7965	10.057	19.0512	18.6411	17.7112
DO378	16.5907	17.9374	19.6971	19.4885	14.3458	20.0734	16.3485	19.8749	17.8187	20.3222	21.6832	16.7359	18.5005	17.0021	17.7474
DO379	17.4709	18.4821	19.6019	19.1164	14.6697	19.9902	16.2611	19.746	17.7017	20.2703	21.512	16.7347	17.9023	17.0366	17.6143
DO380	16.8743	18.0066	19.2908	18.9751	14.3948	19.62	15.5761	19.317	17.1556	19.9568	21.2359	16.535	18.1817	16.7964	17.4501
DO381	16.9614	18.5185	20.2507	20.1694	14.599	20.8703	15.9768	20.3903	18.5133	20.6201	21.9702	17.2524	19.0637	17.7121	19.0083
DO382	16.9428	18.18	19.3232	19.0789	14.553	19.7775	10.9689	19.3011	17.1495	20.009	21.4367	17.1253	18.2785	17.2955	17.3513
DO383	17.4093	18.4519	19.8743	19.5984	14.779	20.1246	15.8988	19.5734	17.4399	20.1853	21.5802	16.7701	18.5511	17.1485	17.8708
DO384	16.3552	17.5343	19.3415	19.3609	13.8231	19.9332	15.8613	19.4542	17.5621	20.1117	21.3637	12.0942	18.7172	18.1294	17.3309
DO385	16.7849	18.4012	19.5176	19.2711	14.1992	20.3884	16.1174	19.8529	17.8242	20.4819	21.7724	16.8635	18.6889	17.5486	18.5791
DO386	16.6256	17.6493	19.3243	19.2681	14.1001	19.8569	11.1508	19.3706	17.3189	20.0597	21.3833	16.9073	18.2465	17.1609	17.4881
DO387	16.5898	17.7889	19.6487	19.5414	14.3234	20.2125	16.2948	19.6652	17.5533	20.3241	21.8328	16.7397	18.0831	17.1784	18.3524
DO388	17.1547	18.2688	19.3822	19.057	14.1333	19.7205	15.8732	19.3973	17.3162	19.9981	21.2968	16.5638	17.6315	16.8027	17.4743
DO389	16.3331	17.6312	19.5227	19.2288	14.8288	19.8613	16.2216	19.4803	17.3253	20.0976	21.4522	16.8413	17.9176	17.1788	17.3954
DO390	17.5636	19.1452	19.8898	19.6491	14.6761	20.3313	16.2199	19.706	17.5955	20.569	21.9072	16.8866	18.4011	17.4593	18.5529
DO391	17.274	18.2458	19.5593	19.2863	14.3803	19.9061	16.0271	19.4989	17.3324	20.2274	21.5673	16.7476	18.4356	17.0426	17.5762
DO392	17.1601	17.8718	19.4383	18.7616	14.4267	19.7551	10.9783	19.5941	17.7483	20.2425	21.5803	10.0839	18.7772	17.8686	17.256
DO393	16.0256	17.3761	19.3669	19.0048	14.3209	19.9941	16.152	19.4843	17.4873	20.2475	21.4859	17.0487	18.3115	17.3826	16.8642
DO394	16.2565	17.7043	19.4545	19.377	14.2917	20.0117	15.9581	19.7251	17.5544	20.2594	21.6062	16.6214	18.0021	17.1092	18.0252
DO395	16.5663	17.6553	19.2312	18.9338	14.9389	19.6418	11.1343	19.1007	16.979	19.7783	21.3168	16.9793	18.2445	17.2246	17.2056
DO396	16.5317	17.9994	19.3998	18.9723	14.6086	19.9428	16.0935	19.5677	17.5586	20.2705	21.5877	17.0417	18.3885	17.1948	17.5024
DO397	16.6911	17.7195	19.2589	18.7708	14.3705	19.834	16.0103	19.3568	17.41	20.2527	21.6724	16.9767	18.38	17.2266	16.8118
DO398	16.4007	17.7017	19.2749	19.0848	14.3867	19.7373	15.7455	19.2664	17.2067	19.8875	21.3651	16.5798	17.6668	16.985	17.414
DO399	16.0618	17.1806	19.2833	18.9772	14.3779	19.7033	11.3566	19.195	17.064	19.7974	21.2474	16.9259	18.1225	17.2022	17.2368
DO400	17.3924	18.9979	20.0869	19.9853	14.5139	20.7431	11.2125	20.3207	18.3358	20.6381	22.1173	17.1578	19.091	17.7973	19.0663
DO401	16.3034	17.9025	19.4123	19.3479	14.3882	19.9797	16.2479	19.6817	17.6455	20.1622	21.4692	16.7722	18.4933	17.1845	17.5765
DO402	16.4725	17.7776	19.2635	18.8359	15.0345	19.9541	15.9766	19.5197	17.4349	20.2522	21.5112	16.9818	18.3456	17.2433	16.982
DO403	16.4411	17.407	19.2617	18.9989	13.1767	19.4816	15.3186	19.0264	17.1221	19.7618	21.2489	8.60753	18.3394	17.7757	17.0984
DO404	17.0275	18.7123	20.0766	20.1979	14.0147	20.6667	15.8572	19.8117	17.8721	20.51	21.8193	10.625	19.1927	19.0067	19.0198
DO405	16.3553	17.8012	19.5411	19.263	14.2819	19.844	11.038	19.1831	17.0149	19.9602	21.4456	17.1414	18.3296	17.4324	17.7841
DO406	16.2416	17.7144	19.6553	19.2559	15.0704	19.9536	16.0238	19.5495	17.3647	20.1091	21.6121	16.9233	18.4895	17.0801	17.6176
DO408	16.332	17.2791	18.8916	18.591	14.3378	19.5761	15.8719	18.9118	16.8588	19.9015	21.1992	16.6332	18.0466	17.0303	16.515
DO409	16.6881	18.0928	19.6942	19.2323	14.0796	20.2962	16.4093	19.5911	17.65	20.6001	21.9155	16.9069	18.6614	17.3212	17.7523
DO410	16.3202	17.6564	19.3325	19.0341	14.6648	19.7233	15.7715	19.4426	17.3406	20.0115	21.3465	16.6692	17.6834	16.8622	17.1948
DO411	16.6557	17.8998	19.7087	19.4621	14.7945	20.243	16.1727	19.7942	17.8358	20.6037	21.8783	16.9559	18.6964	17.3479	17.3425
DO412	16.7578	18.3006	19.8221	19.8442	14.3765	20.7092	15.9817	19.9053	17.8834	20.6151	21.9178	17.3186	18.8815	17.8671	19.1267
DO413	16.587	18.3065	20.2301	20.1893	13.9878	20.6611	10.7651	20.1143	18.1552	20.5723	22.056	17.4456	19.0013	18.0182	19.3344
DO414	16.5041	17.7334	19.316	18.9814	14.1399	19.8687	15.9144	19.2033	17.1418	20.1961	21.5981	16.8434	18.359	17.2515	17.3574
DO415	16.8904	17.6915	19.0002	18.5742	15.1591	19.8095	16.1452	19.2748	17.3179	20.0801	21.4074	16.9958	18.2056	17.269	16.7827
DO416	16.878	17.8528	19.7016	19.6296	13.6767	20.2268	16.2959	19.7163	17.8243	20.482	21.7263	9.31259	18.9528	18.4287	17.6924
DO417	16.769	18.0495	19.39	19.2895	14.8482	19.9299	16.5857	19.4883	17.2555	20.1558	21.4938	16.5843	17.8509	17.0383	17.3681
DO420	16.5004	17.5147	19.4918	19.2593	13.8757	20.0182	16.037	19.7028	17.5766	20.2	21.6068	16.7443	18.3426	16.8895	17.9208
DO461	16.8101	18.1841	19.5014	18.9123	14.3366	19.9503	15.7818	19.5025	17.6806	20.4309	21.6753	16.9485	18.6097	17.2144	17.7198
DO462	16.4839	17.6362	19.2255	18.9163	14.5783	19.716	16.0838	19.1005	16.9723	19.9667	21.1858	16.5375	17.6862	16.9574	17.4172
DO463	16.4235	17.6555	19.2374	18.9665	14.4248	19.6982	15.7171	19.2175	16.9161	19.9772	21.1826	16.5961	17.5182	16.9123	17.1611
DO464	17.6794	18.7276	19.3142	19.0502	14.1078	19.6847	15.9857	19.4028	17.5745	20.0557	21.2426	9.77339	18.459	17.9635	16.9192
DO465	17.0817	18.1947	19.6483	19.6435	13.7328	20.1122	15.7008	19.5572	17.6982	20.3171	21.5214	9.50264	18.8474	18.3695	17.8981
DO466	16.2709	17.8772	19.4233	19.086	15.0065	19.9467	11.2259	19.6627	17.585	20.1798	21.356	17.1369	18.4012	17.3436	17.2146
DO468	16.7618	17.9911	19.6062	19.6685	13.5437	20.0742	15.9023	19.407	17.4712	20.3177	21.4648	10.0505	18.7725	18.3321	17.9172
DO469	16.3012	17.8952	19.6582	19.4809	14.1542	20.2294	16.0532	19.7413	17.6993	20.2549	21.6583	16.8136	18.6178	17.3804	18.4673
DO470	16.9827	18.0026	19.4385	19.2293	14.8698	19.9131	10.9624	19.5372	17.3473	20.2154	21.788	17.4619	17.7713	17.0028	17.6132
DO471	16.8773	17.991	18.9909	18.8404	14.6617	19.6391	15.6194	19.2553	17.2165	19.978	21.1806	16.4322	17.5593	16.9304	17.1739
DO472	16.7817	17.8488	18.9821	18.4746	14.4545	19.5398	16.286	18.9545	16.8674	19.9598	21.1799	16.7258	18.1499	17.1023	16.3533
DO474	16.8744	18.4511	19.9429	19.7335	14.4291	20.6544	15.9327	20.0869	18.0254	20.5891	22.008	17.2298	18.9278	17.63	19.054
DO475	16.2676	17.4812	18.9787	18.5284	14.3877	19.6321	15.9939	19.2068	17.1729	20.0823	21.3348	16.6794	18.1523	17.0482	17.0967
DO476	17.2698	18.5727	19.7406	19.5082	13.9754	19.9125	15.7132	19.678	17.9116	20.2637	21.5544	9.95761	18.7932	18.2387	17.7289
DO477	16.431	17.5642	18.8664	18.5602	14.6163	19.5529	15.6343	19.0727	17.1487	19.9455	21.1803	16.7209	18.0383	17.0136	16.5711
DO478	16.4711	17.7265	19.082	18.4934	13.9472	19.527	15.6341	19.112	17.135	19.8965	21.308	16.7779	18.1863	17.0453	16.7666
DO479	16.3618	18.2212	19.9171	19.9104	14.0796	20.5943	16.108	20.1936	18.2639	20.4922	21.6992	16.9006	18.7905	17.5392	18.9147
DO480	15.8033	17.3452	19.3906	19.276	14.2047	19.958	16.2245	19.4387	17.3899	19.9432	21.2567	16.4052	18.2837	17.0491	17.7441
DO481	15.5828	16.9316	19.318	18.9447	14.2332	19.7033	15.7553	19.154	17.0017	19.8844	21.2014	16.456	17.6386	16.8485	17.3348
DO482	16.8408	18.3416	19.6602	19.5262	13.3715	19.9875	15.7443	19.5655	17.6679	20.2957	21.6054	9.05688	18.7668	18.4113	17.8746
DO483	17.3205	18.5525	19.7277	19.6916	14.3914	20.7106	15.9101	20.1324	18.1277	20.6115	21.8325	17.2936	18.8149	17.7154	19.0833
DO484	16.107	17.6298	19.0593	18.7038	14.1072	19.5482	10.6865	19.2076	17.1479	19.8347	21.0593	17.1034	17.5204	16.7835	17.042
DO485	16.6389	17.9024	19.7013	19.3207	14.6076	20.322	16.2116	19.7773	17.7688	20.6456	21.8454	17.0031	18.7947	17.5222	17.6459
DO486	16.8653	18.6295	19.659	19.7954	14.3923	20.7562	15.8945	19.9911	17.9932	20.615	21.7252	17.1925	18.7932	17.8274	18.9565
DO487	16.0053	17.529	19.3684	19.1175	13.9889	19.9006	10.9655	19.3416	17.2738	20.0806	21.3766	17.2178	17.7246	16.9953	17.487
DO488	16.9414	17.9756	19.3598	19.0019	13.9885	19.8401	15.679	19.3376	17.2856	19.9957	21.4343	16.455	17.8635	16.9501	17.954
DO489	17.1152	18.2683	19.3559	19.2428	13.6456	19.7821	15.754	19.298	17.4733	20.1053	21.5038	9.52055	18.6989	18.1233	17.2932
DO490	16.023	17.7372	19.7958	19.6215	14.2178	20.4766	11.369	19.8231	17.7086	20.477	21.8585	17.0679	18.7137	17.5649	18.7215
DO491	16.4414	17.5492	19.1792	18.7642	14.4786	19.7209	10.7911	19.1088	17.0322	20.0506	21.2282	17.0136	18.2676	17.2826	17.211
DO492	16.9181	18.2807	19.7096	19.4941	14.376	20.5833	15.6622	20.1156	18.2306	20.5345	21.7019	17.2687	18.7451	17.6866	18.9471
DO493	16.5204	17.7267	19.2117	19.1682	13.5725	19.7694	15.8753	19.3647	17.5063	20.0268	21.3133	9.11478	18.6323	18.1362	17.3157
DO494	16.5246	17.738	19.4767	19.2475	14.023	19.944	11.1011	19.5309	17.54	20.2321	21.4408	17.2757	17.8381	16.931	17.9488
DO495	16.6489	17.7822	19.4936	19.2886	13.7818	20.0521	10.8294	19.463	17.5439	20.081	21.4052	17.2837	17.8661	17.0746	17.8516
DO496	16.4523	17.7947	19.4595	19.1041	14.4859	19.766	15.7224	19.2902	17.1988	19.9718	21.451	16.6628	17.8016	16.8652	17.6385
DO497	16.9768	17.7632	19.0483	18.9058	14.1102	19.5884	10.7738	19.0022	16.9671	19.849	21.1982	16.9493	18.1026	17.175	17.2098
DO498	16.6687	17.7573	18.8385	18.6397	14.5303	19.3708	11.1698	19.1423	17.1317	19.6242	20.8321	16.9116	17.1713	16.5222	16.5911
DO499	16.4298	17.4749	19.1113	18.7856	13.8419	19.6054	10.7349	19.0955	17.0574	19.8597	21.1411	17.1496	17.5488	16.7305	17.2038
DO500	16.9093	18.0496	19.5794	19.2848	14.1235	19.8561	15.5726	19.4767	17.6893	20.1845	21.5149	10.5743	18.7354	18.3124	17.2514
DO501	16.8162	17.6463	19.4897	18.8851	14.5204	19.903	15.9054	19.6314	17.924	20.2084	21.6186	16.6538	18.6013	17.4402	17.4136
DO502	17.5907	19.2426	20.498	20.4176	14.7916	21.1386	16.1359	20.7015	18.7464	20.8858	22.1103	17.2652	18.7521	17.8053	19.3348
DO503	16.3463	17.0981	18.878	18.5292	14.4302	19.3105	15.88	18.9014	16.7732	19.6004	20.9604	16.3864	17.8425	16.7696	16.8158
DO504	16.4422	17.6067	19.181	18.8585	14.3669	19.6778	15.6691	19.254	17.1049	20.0139	21.3875	16.5576	18.2352	16.9672	17.4732
DO505	16.5736	17.7984	19.1996	19.1806	13.6851	19.7514	15.7652	19.3616	17.5993	20.0332	21.4199	10.2327	18.6726	18.25	17.1572
DO506	16.8208	17.8011	19.3488	19.0975	14.6877	19.9834	16.3441	19.4712	17.4233	20.2154	21.3848	16.712	18.4402	17.1923	17.5539
DO507	16.0838	17.3487	18.9812	18.3702	14.3866	19.5795	15.7747	19.079	17.1097	20.0213	21.3869	16.7709	18.1537	17.0283	16.5596
DO508	16.2083	17.5666	19.1868	18.8102	14.1085	19.7985	16.1745	19.3765	17.4649	20.1813	21.3905	16.7805	18.3228	17.2294	17.1438
DO510	16.5305	17.5513	19.2784	18.751	14.1767	19.9233	16.1368	19.251	17.3029	20.2789	21.6879	16.8773	18.4285	17.2449	17.3336
DO511	17.0284	17.996	19.0627	18.5289	15.1211	19.7359	16.0634	19.2962	17.3392	19.946	21.2949	16.8484	18.1476	17.089	16.8445
DO512	16.7717	17.6007	19.2335	18.8799	14.295	19.896	15.9873	19.3379	17.2589	20.2282	21.5653	16.8686	18.3046	17.1675	16.8591
DO513	16.4233	17.6097	19.6332	19.1519	14.1347	20.0719	11.383	19.6124	17.7601	20.5232	21.6886	10.3281	18.8883	17.8895	17.7069
DO515	17.2416	18.2571	19.7597	19.3153	14.6921	20.2156	15.9948	19.6464	17.5712	20.4967	21.983	16.9874	18.7578	17.3382	17.9842
DO516	16.4689	17.7999	19.7756	19.5561	14.3279	20.1501	16.0779	19.471	17.2555	20.1495	21.6812	16.7408	18.6662	17.14	18.0913
DO517	15.9691	17.4023	19.0914	18.8046	14.8094	19.596	10.9976	19.0144	16.9707	19.6131	20.981	16.8438	18.0066	17.1324	17.1527
DO518	16.4876	17.5806	19.2965	19.0979	14.4713	19.8594	11.1773	19.086	17.276	20.0942	21.2915	17.0448	18.3631	17.4472	17.4257
DO519	17.0097	18.2033	19.8372	19.7125	14.25	20.427	15.5013	19.9707	18.0183	20.3166	21.822	16.9579	18.852	17.6172	18.9588
DO520	17.5359	18.8207	20.1457	19.9219	14.1779	20.6196	10.8098	19.8818	17.9678	20.4462	22.0638	17.4377	19.1231	17.8304	19.34
DO521	16.8206	18.0243	19.5527	19.4131	14.7701	20.0485	16.4236	19.6768	17.5896	20.2534	21.6177	16.7974	18.575	17.2739	17.6122
DO522	16.5394	17.4856	19.0274	18.7731	14.8967	19.5996	15.5262	19.1226	16.9801	19.7286	21.1412	16.4773	17.4623	16.857	17.2563
DO523	16.2377	17.6721	19.7328	19.5209	14.709	20.0613	15.9951	19.6075	17.4637	20.3493	21.5614	16.854	18.6557	17.1637	17.7824
DO524	16.4484	17.748	19.47	19.3227	14.6196	19.9721	11.0365	19.3637	17.2025	20.1353	21.45	17.0939	18.3277	17.3185	17.6115
DO525	16.2208	17.3348	19.1884	19.1141	14.4327	19.7631	11.1024	19.1088	16.9509	19.9443	21.2767	16.8748	18.1957	17.2201	17.5545
DO526	16.0433	17.3387	19.1276	18.6691	15.0323	19.6889	15.53	18.6347	17.3337	20.0532	21.2269	17.2069	18.2771	17.3974	16.2945
DO527	16.7248	18.0926	20.0128	19.7763	14.237	20.6166	16.2238	20.0179	18.004	20.9162	22.2666	17.1704	19.0171	17.6681	18.6464
DO528	16.3381	17.7511	19.3599	18.9011	13.9149	19.7294	15.9759	19.4026	17.4744	20.099	21.3817	16.7727	18.2369	17.1017	16.9479
DO529	16.4222	17.715	19.4497	19.1669	14.4573	20.1641	16.4349	19.5282	17.574	20.4763	21.7599	16.8226	18.5575	17.3576	17.4754
DO530	16.8176	17.7033	19.7941	19.8137	13.5902	20.2403	16.0698	19.5462	17.6815	20.3998	21.6774	9.71956	18.908	18.3955	17.5247
DO531	16.7614	17.615	19.3336	19.1898	14.457	19.8262	10.8196	19.217	17.1707	19.9533	21.429	16.9887	18.3385	17.2236	17.594
DO532	16.6985	18.0717	19.443	19.0097	14.1513	19.9007	16.2528	19.4735	17.4871	20.3306	21.527	16.8086	18.4706	17.1692	16.9944
DO533	16.8301	18.3915	19.9062	19.8715	14.2623	20.8976	16.0693	20.222	18.1766	20.7277	22.1392	17.2966	18.9608	17.9839	19.2498
DO534	16.8816	18.0092	19.4666	19.1056	14.1661	20.0428	16.4324	19.5771	17.6217	20.4717	21.7313	17.0326	18.5148	17.3536	17.2062
DO535	16.6545	17.5493	19.3484	19.1142	14.6238	19.8934	16.1091	19.4062	17.2301	20.0763	21.4926	16.5884	18.3282	16.9776	17.704
DO536	17.1036	18.561	19.5721	19.2873	14.7388	20.063	16.3616	19.8329	17.7872	20.5734	21.6305	16.8851	18.5394	17.1137	17.3673
DO537	16.4634	18.0166	19.5889	19.6428	13.5777	20.1107	15.7037	19.6293	17.7283	20.3234	21.6045	9.02918	18.8412	18.4161	18.0243
DO538	16.4132	17.5926	19.7346	19.4966	14.4791	20.1362	16.2073	19.8107	17.7483	20.3426	21.7624	16.708	17.9523	17.3351	18.0356
DO539	16.1792	17.5149	19.578	19.4864	14.4551	20.0877	16.0882	19.7199	17.5597	20.2995	21.7524	16.6352	18.5967	17.154	18.0575
DO540	16.2378	17.6735	19.283	18.7411	13.8256	19.7641	15.9216	19.5936	17.638	20.3661	21.3456	17.0186	18.1331	16.9739	16.6755
DO541	16.502	17.7722	19.4837	19.1066	14.3425	20.0475	16.118	19.5426	17.5385	20.4217	21.7353	16.93	18.4292	17.176	17.3998
DO542	16.7767	17.757	19.4627	19.2091	14.2975	19.9205	15.8109	19.4769	17.4416	20.0485	21.4329	16.7611	18.3725	17.1057	17.6172
DO543	17.3449	18.8197	19.9582	19.8977	14.2122	20.5525	11.0688	20.0178	17.9362	20.4473	21.9591	17.0085	18.8186	17.79	18.8086
DO544	16.1856	17.2591	19.4571	19.239	14.4042	20.0472	11.1789	19.3811	17.2442	20.1123	21.4221	16.9545	18.365	17.461	17.6687
DO545	16.401	17.7835	19.434	19.2805	14.3308	20.0046	11.4371	19.4133	17.3136	20.0186	21.5201	16.9	18.4404	17.4194	17.6791
DO546	16.3383	18.2489	20.1142	19.8202	14.3236	20.6155	10.9612	20.137	18.1212	20.412	22.0261	17.4793	19.0526	17.8714	19.2164
DO547	16.7333	17.8199	19.658	19.2906	14.5469	19.9991	16.3809	19.3693	17.2253	20.1894	21.6146	16.7587	18.4158	17.0681	17.6871
DO548	16.5335	17.8341	19.4166	19.1637	14.1808	19.7829	15.8802	19.4502	17.2785	20.0206	21.4402	16.6486	18.3322	16.9714	17.3817
DO549	16.3595	18.1159	19.9132	19.4313	14.8185	20.4737	10.9387	20.146	18.057	20.5819	22.0379	10.7363	19.1882	18.2158	19.2087
DO550	16.9911	18.0364	19.8309	19.7609	14.1533	20.42	10.8693	19.979	18.0098	20.5281	21.8256	17.2285	18.6846	17.6152	18.5695
DO551	16.7253	17.6273	19.7733	19.8403	13.6458	20.2625	15.7965	19.722	17.8998	20.3932	21.5791	9.48689	18.8641	18.4089	17.9675
DO552	16.8335	17.8349	19.3473	19.1742	14.2233	19.9109	11.4884	19.5071	17.4403	20.0583	21.4099	17.3143	17.6938	17.0367	17.2634
DO553	16.7806	18.3698	19.8214	19.614	13.9633	20.2016	15.713	19.5942	17.5602	20.0575	21.6848	16.959	18.1303	17.3694	18.7711
DO554	16.716	18.4658	19.8946	19.8143	14.6428	20.4093	16.0197	19.7994	17.6863	20.3259	21.7471	16.6385	18.9932	17.4999	18.9737
DO555	16.0302	17.5015	19.0864	18.7593	14.4461	19.7231	15.7374	19.1767	17.1736	20.0187	21.3846	16.8891	18.1142	17.138	16.7094
DO557	16.5497	17.7753	19.4363	19.4366	14.0726	19.9526	15.8925	19.5154	17.6195	20.1175	21.4267	9.15883	18.6792	18.1594	17.1995
DO558	16.8882	17.9799	19.6327	19.7885	14.1039	20.1433	15.9945	19.5306	17.6127	20.2918	21.5324	11.1704	18.8086	18.1948	17.536
DO559	16.1752	17.3886	19.712	19.6226	14.1578	20.3788	15.9823	19.6694	17.5626	20.2489	21.6805	16.7198	18.8645	17.3434	18.1234
DO560	16.6325	17.674	19.135	18.5194	14.2465	19.5537	15.9562	19.0873	17.1272	20.0049	21.3857	16.799	18.2245	17.1602	16.4023

## Sheet: 2b. adipose
DO mouse	mt-Rnr1	mt-Rnr2	mt-Nd1	mt-Nd2	mt-Nd3	mt-Nd4	mt-Nd4l	mt-Nd5	mt-Nd6	mt-Cytb	mt-Co1	mt-Co2	mt-Co3	mt-Atp6	mt-Atp8
DO021	16.6392	17.0459	18.3227	17.9375	14.3063	19.1914	15.5252	18.741	16.8837	19.8102	21.1082	16.6806	18.0385	17.2403	17.0889
DO022	14.5452	15.1858	17.7784	17.3873	13.0316	18.4521	10.3883	18.1316	16.0505	18.8776	19.814	10.4944	17.3613	16.8497	16.4004
DO023	15.6861	15.8404	18.0891	17.6238	12.9657	18.7077	14.9301	18.2041	16.0899	18.8348	20.3891	16.0934	16.6652	16.3293	16.8618
DO024	17.9274	18.4374	19.0752	18.7719	14.7152	19.6871	15.999	18.8355	16.7271	20.2632	21.3973	16.8523	18.0041	17.4129	17.9701
DO025	17.8431	18.0476	19.4214	19.9172	14.6518	20.2617	16.6521	19.6651	17.5969	20.7548	21.822	12.4546	19.2522	18.7709	17.9083
DO026	18.3432	19.1216	20.2885	20.0699	16.0129	20.9308	17.1729	19.9184	18.0204	21.182	22.3926	17.6542	18.8543	18.4255	19.3388
DO027	18.1814	18.4399	19.2803	19.0842	15.1956	20.1357	16.4579	19.4305	17.5006	20.7124	21.8715	17.2776	18.7951	17.6897	17.708
DO028	16.9919	17.488	18.4318	18.0502	14.5978	19.4189	15.9419	18.7688	16.9125	20.2196	21.3451	16.9889	18.2463	17.3722	16.7927
DO030	16.7952	16.8926	18.3997	18.1897	13.9144	19.2234	15.6354	18.8328	16.6986	19.639	20.8963	16.376	17.6733	16.7626	17.0558
DO031	18.8877	19.6808	20.0163	19.5444	15.8829	20.6511	17.0722	19.8546	17.5685	21.0677	22.4324	17.5682	18.6663	18.1074	18.9885
DO032	14.6037	15.5409	17.0405	16.7701	12.6348	17.8481	14.3052	17.4974	15.5269	18.1172	19.6855	15.7304	16.6006	16.1898	15.7967
DO033	17.3511	17.6866	19.2351	18.9226	14.7828	20.0065	16.4554	19.0743	16.9504	20.4992	21.7501	16.9935	18.061	17.4883	18.0671
DO034	18.5228	19.1323	19.8829	19.4791	15.5709	20.6716	17.0467	20.1606	18.262	21.1473	22.3838	17.3352	19.2795	18.0401	18.3146
DO035	16.7874	17.6393	18.3962	18.5302	14.5954	19.3913	10.8439	18.974	16.8897	19.8525	21.0432	16.9127	17.8556	17.2742	17.3929
DO036	15.5359	15.8056	17.9725	17.4547	13.5851	18.6691	10.9058	18.42	16.2014	19.1993	20.4287	11.1856	17.7551	17.0575	16.3577
DO037	16.5403	17.4864	18.7356	18.4929	14.5606	19.8215	16.1019	19.3838	17.4373	20.0636	21.3179	16.9897	18.2488	17.4826	17.8279
DO038	15.1964	15.7668	17.824	17.4236	13.2338	18.6846	15.1579	18.1924	16.1955	19.0858	20.5398	16.4535	17.4558	16.8409	16.711
DO039	16.9348	17.2186	18.4049	18.1733	13.8857	19.3483	10.5852	18.9235	16.9294	19.6188	20.8378	16.911	17.8229	17.1999	17.1029
DO040	17.7565	18.2182	19.1394	18.8881	14.8456	20.035	16.1912	19.4327	17.2628	20.2564	21.6993	16.8016	18.7206	17.5291	18.4869
DO041	15.3385	16.7319	18.4894	18.2411	14.0981	19.199	15.633	18.7655	16.7111	19.6894	20.8973	16.4341	17.3557	16.851	17.3803
DO042	17.5073	18.4294	19.6949	19.4938	15.7751	20.7964	17.0471	19.8797	17.8681	21.0809	22.3315	17.3344	19.1736	18.2344	19.0496
DO043	17.119	17.5059	17.9209	17.6321	12.9912	18.6991	9.98794	18.2313	16.0484	18.9216	20.2626	16.6873	17.1787	16.8286	16.6376
DO044	16.1789	16.2899	18.0909	18.2975	12.9948	19.0099	15.2966	18.7752	16.7351	19.4219	20.5243	13.463	17.9533	17.4204	16.7852
DO046	19.2508	19.5566	20.2388	20.1459	16.1793	20.8848	17.1072	20.3351	18.2408	21.2968	22.3382	17.4983	19.5812	18.3692	19.2619
DO047	18.007	18.2866	19.3062	19.026	15.1552	20.1176	16.4792	19.6342	17.6789	20.608	21.6647	17.1377	18.6747	17.6855	17.703
DO048	15.8188	16.1372	18.1084	17.7224	13.0468	18.8408	15.1433	18.4521	16.444	18.9574	20.3909	16	16.8135	16.3705	16.9364
DO049	15.7614	16.4394	17.9685	17.7594	13.5866	18.9033	15.1667	18.4284	16.5388	19.321	20.4328	16.4744	17.5619	16.884	16.6552
DO050	17.7253	18.5924	18.8737	18.5487	15.0191	19.6745	16.1395	19.2967	17.3324	20.3071	21.5326	17.1959	18.4072	17.4884	17.1638
DO051	16.2305	16.7535	18.0102	17.8186	13.279	18.6431	15.1733	18.2532	16.1326	18.9177	20.1993	15.8401	16.6172	16.2026	16.6597
DO052	17.6058	17.8696	19.2993	18.9275	15.1179	19.959	16.3264	19.2352	17.1219	20.495	21.7127	17.0029	18.8425	17.5774	18.2991
DO053	16.1833	17.0531	18.1239	18.3769	13.5244	19.1448	11.7751	18.4639	16.2833	19.2647	20.6988	16.6929	17.5028	17.2968	17.3966
DO054	17.8461	18.5538	19.3109	19.5053	15.4695	20.1594	11.4407	19.4074	17.237	20.6063	21.7109	17.298	18.6164	18.0342	18.4867
DO055	16.9652	17.6593	18.6765	18.6157	14.5466	19.5664	16.0746	18.7835	16.4598	19.9509	21.318	16.668	18.2774	17.1512	17.7197
DO056	16.5149	16.9378	18.6139	18.8374	13.588	19.5131	15.4084	19.0161	17.0729	19.9005	21.0586	8.58748	18.3965	17.9332	17.609
DO057	17.6751	18.3406	19.4564	19.05	15.3371	20.2253	16.5429	19.6143	17.7582	20.7932	21.981	17.111	18.872	17.7757	18.2499
DO058	18.1526	19.0018	19.8848	19.5142	15.5969	20.5943	16.8734	19.792	17.7541	21.0484	22.4578	17.3774	18.6388	18.0662	18.7401
DO059	16.482	17.1222	18.8633	18.8141	14.669	19.7911	10.904	18.9207	16.9125	20.1211	21.4033	16.9453	18.3151	17.6258	17.9184
DO060	16.3479	16.9085	18.8098	18.491	13.8316	19.6378	15.4592	18.8133	16.7022	20.0444	21.5349	16.6289	18.5487	17.3183	18.2851
DO061	16.0822	16.8962	17.9803	18.4441	12.7377	18.927	15.1289	18.5474	16.5002	19.3143	20.5958	10.618	17.7498	17.413	16.9042
DO062	16.7723	17.5653	18.8423	18.4956	14.2005	19.7838	16.0472	18.7119	16.7076	19.9759	21.4587	16.7275	18.3971	17.3755	18.0053
DO063	16.9879	18.2503	19.4452	19.2969	15.0069	20.2809	16.4122	19.6005	17.5935	20.6204	21.8434	17.2306	18.7551	17.8041	18.1383
DO064	15.9559	16.7019	17.8618	18.0529	13.0512	18.8024	15.0341	18.4076	16.5246	19.1833	20.3525	12.4527	17.8081	17.5458	16.7809
DO065	14.8906	15.7079	17.2484	17.1453	13.2093	18.3917	14.6498	17.8586	16.0605	18.6902	19.882	16.15	16.9504	16.5304	16.2042
DO066	15.8361	17.305	18.8174	18.7313	14.6158	19.5916	10.7164	19.1116	16.9891	19.9981	21.0621	17.0246	18.1904	17.5364	17.9181
DO067	16.6317	16.7683	18.3669	18.5293	13.5139	19.0154	15.2411	18.7339	16.7376	19.4664	20.7418	11.174	18.0702	17.67	16.6787
DO068	18.3802	19.2225	19.3178	19.2452	15.6278	20.4411	16.4869	19.8131	17.866	20.8909	22.1767	17.3041	19.0062	18.1684	18.4721
DO069	14.6499	15.6393	17.5013	17.2437	13.2618	18.5607	15.0339	18.1466	16.1546	18.8687	20.1777	16.1305	17.1937	16.7509	16.7025
DO070	17.9458	18.5463	19.0793	18.7413	14.4678	19.7974	10.9426	19.4016	17.3431	20.32	21.4791	17.5168	17.775	17.2407	17.835
DO071	15.4173	16.3155	17.6023	17.5037	13.0478	18.4088	15.0508	17.9239	15.7189	18.6513	19.9362	15.4665	16.1361	15.9005	16.1962
DO072	15.4433	15.9594	17.491	16.9888	12.8575	17.9035	14.2789	17.6248	15.4716	18.1588	19.6544	15.3565	16.0141	15.4479	15.6742
DO073	16.0826	16.6537	18.3573	18.1389	13.8087	19.2188	15.592	18.6644	16.5683	19.4811	20.849	16.4073	17.6833	16.8978	17.2283
DO074	16.6311	16.8896	17.6917	17.4043	13.1739	18.6435	14.9994	18.2688	16.3592	19.0804	20.282	16.4146	17.2477	16.6309	16.5733
DO075	14.3454	15.9482	17.8948	17.6822	12.9708	18.4888	14.8373	18.0781	15.911	18.8157	20.1161	15.8022	17.0689	15.9921	16.6869
DO076	16.0004	16.4788	18.0621	17.889	13.4317	19.1054	15.2921	18.5024	16.3873	19.167	20.5738	16.1484	17.6457	16.6344	17.249
DO078	14.2159	15.398	17.4974	17.0448	12.7063	18.1377	14.8856	17.8116	15.8181	18.6995	19.9535	15.9633	16.7444	16.15	15.1523
DO079	16.2882	16.1433	17.764	18.0091	12.4482	18.8174	15.0371	18.6246	16.6381	19.1563	20.3982	11.3663	17.7666	17.4271	16.6716
DO080	14.6742	15.7565	17.5312	17.1685	13.0229	18.5413	14.6624	18.2469	16.3066	18.6637	20.0745	16.2421	17.0008	16.6392	16.7442
DO081	15.6273	16.2351	18.3611	18.0799	13.5054	19.251	15.6993	18.7983	16.4818	19.3124	20.6008	16.7929	16.9153	16.464	17.3677
DO082	15.4273	16.234	18.1588	17.9911	13.3458	18.9449	15.2389	18.4527	16.2668	19.2144	20.3722	15.9748	16.7849	16.5058	16.7967
DO083	14.3191	15.6875	17.9766	17.6161	13.3102	18.7054	15.1513	18.3335	16.1983	18.8593	20.2805	16.3703	17.201	16.8198	16.9855
DO084	15.3036	16.3215	18.294	18.0165	13.6915	19.0446	15.4429	18.604	16.4711	19.4515	20.7511	16.2448	17.7099	16.7337	17.2463
DO085	15.3708	16.1433	18.0427	17.7538	13.3324	18.5899	10.0388	18.1374	16.0227	18.6525	20.1626	16.4127	17.023	16.7539	16.6898
DO086	15.5819	16.4475	18.4232	18.2859	13.9579	19.4776	15.8942	18.7921	16.8836	19.7756	21.0546	16.8185	17.9938	17.348	17.4383
DO087	15.635	16.4945	18.2222	18.1174	13.8424	19.4688	15.6127	18.822	16.8537	19.6328	20.989	16.6515	17.949	17.3116	17.4885
DO088	15.4405	16.0582	17.8161	17.6139	13.4967	18.3027	14.6253	17.8859	15.8819	18.5536	19.9608	15.6031	17.0583	15.9888	16.3036
DO089	14.9903	16.7502	18.7078	18.3041	13.8799	19.0944	10.5736	18.7259	16.6109	19.1821	20.6057	16.8866	17.3777	17.1692	17.5643
DO090	16.4223	16.1518	18.3004	18.5324	13.1274	19.3755	15.6488	18.9829	16.9388	19.7817	21.0008	11.0311	18.22	17.7708	17.017
DO091	15.1078	15.8748	18.0135	17.9622	12.6039	18.5747	14.9357	18.3329	16.41	18.8501	20.2531	8.86192	17.2639	16.9235	16.3216
DO092	15.8191	16.0671	18.2582	17.9447	12.7975	18.969	15.107	18.5973	16.6018	19.0056	20.4534	16.028	16.9016	16.6057	17.2948
DO093	15.5727	15.9498	17.7303	17.4779	12.7581	18.2109	14.6705	17.8224	15.6889	18.612	19.962	15.6189	16.9445	15.9787	16.3105
DO094	16.0026	17.1941	18.4201	18.6291	13.6648	19.586	15.6045	18.9269	16.91	19.7967	20.96	10.3894	18.4033	18.1258	17.5874
DO095	15.6774	17.3721	18.6224	18.3647	14.0851	19.0683	15.6541	18.669	16.4636	19.5876	21.0233	16.4301	17.8207	16.65	17.1775
DO096	16.9842	17.26	18.8489	19.0239	13.3495	19.2888	15.6382	18.8316	16.8043	19.5396	21.0365	10.8561	18.2927	17.6942	17.1008
DO097	15.2107	15.5976	17.8955	17.7087	13.3964	18.707	13.2704	18.3175	16.284	19.0512	20.3447	11.5914	17.8131	17.2778	16.6854
DO098	16.2747	15.995	17.6558	17.2737	13.176	18.4807	14.8595	17.9643	15.8608	18.9418	20.3933	15.8519	16.7342	16.3254	16.3402
DO099	15.7039	15.9984	17.6591	17.6019	13.1845	18.5722	11.0588	18.0487	15.9119	18.6348	19.9808	16.4638	17.0015	16.8572	16.76
DO100	16.0379	16.2382	18.2442	18.0792	12.7634	18.6784	15.0973	18.5103	16.4248	19.2088	20.4015	9.11974	17.437	16.9406	16.3962
DO101	14.8324	15.6747	17.9307	17.9041	13.691	18.9821	15.4653	18.4583	16.3886	19.4131	20.7048	16.4587	17.5548	16.9534	16.4252
DO102	15.2122	16.1223	17.9486	17.6631	13.356	18.6449	15.0404	18.335	16.6105	18.6536	20.1511	16.1556	17.0631	16.8825	16.8495
DO103	16.6258	16.9744	17.9696	17.5076	13.3167	18.9288	15.1842	18.4845	16.3786	19.2218	20.659	16.0332	17.6204	16.5911	16.9537
DO104	16.04	16.9438	18.3185	18.7756	12.7838	18.8518	15.0156	18.4715	16.4484	19.3297	20.5465	10.2533	17.708	17.1766	16.8049
DO105	16.9719	17.2603	17.3395	16.9654	13.0294	17.8389	14.5375	17.6131	15.4285	18.2224	19.608	15.2841	15.8456	15.4456	15.6429
DO106	17.2406	17.8934	18.3607	18.0999	14.0062	19.2028	15.6831	18.4985	16.6227	19.49	20.7369	16.873	17.8384	17.2468	17.2272
DO107	17.4039	17.6028	17.8392	17.4876	13.5071	18.7879	15.2323	18.4942	16.5715	19.3657	20.5139	16.5905	17.4497	16.8713	16.5107
DO108	15.986	16.6108	18.3131	18.2396	13.3671	18.9676	15.3595	18.4198	16.2322	19.2082	20.549	16.1581	16.9128	16.5051	17.0483
DO109	16.1334	16.8593	18.0306	17.8555	13.3798	19.0167	15.5354	18.5745	16.4695	19.2008	20.5228	15.9246	17.6561	16.6237	17.1436
DO111	15.0708	16.0332	18.0046	17.5061	13.4125	19.0159	15.3458	18.4993	16.571	19.534	20.675	16.6446	17.5687	16.9497	16.7834
DO112	16.2766	16.6825	17.8279	17.5082	13.7471	19.0209	15.4203	18.2511	16.3797	19.4923	20.6359	16.5678	17.6326	17.016	16.4189
DO113	17.1682	17.3497	17.7692	17.5559	13.9818	19.0401	15.7663	18.6418	16.7404	19.5864	20.7224	16.6449	17.6151	17.1594	16.4944
DO114	15.1049	15.8501	17.6621	17.3616	13.5502	18.7445	15.1863	18.1193	16.1989	19.2471	20.56	16.3681	17.3257	16.7737	16.2339
DO115	17.2122	17.2142	18.2848	17.8581	13.8724	19.2324	15.461	18.6639	16.5501	19.3647	20.8348	16.3383	17.0496	16.821	17.2554
DO116	16.752	17.2438	18.932	18.6348	14.4777	19.9194	16.3645	18.8564	16.5915	19.9837	21.4967	17.0549	18.3843	17.6358	18.0927
DO118	16.8548	17.0751	18.2507	17.9921	14.0044	19.2217	10.8127	18.8148	16.7831	19.5608	20.8393	10.2974	18.0262	17.5525	17.2083
DO119	17.8905	17.6402	18.0978	17.6455	13.9231	19.2224	10.9969	18.973	16.8206	19.5448	20.7437	9.10017	18.0378	17.487	16.954
DO120	17.2898	17.4189	17.7347	17.595	12.8502	19.0425	15.2117	18.5777	16.4704	19.1338	20.669	16.0134	16.7023	16.5724	16.8393
DO121	18.0619	18.3908	18.5309	18.1887	14.1762	19.3698	15.6679	18.5827	16.6142	19.6418	21.0394	16.4898	17.5211	17.0931	17.596
DO122	16.8399	17.3259	17.9572	17.6329	13.7967	18.993	15.2512	18.4482	16.6273	19.3905	20.5525	16.4724	17.6926	17.0448	16.8067
DO123	16.1465	16.5829	17.9278	17.7696	13.4652	18.7867	15.5365	18.2678	16.3192	19.1781	20.5544	16.5243	17.5072	16.8668	16.2905
DO124	16.6567	17.219	18.4331	18.1864	13.8984	19.1654	15.5267	18.5487	16.3319	19.5451	20.7985	16.3233	17.2163	16.7553	17.2697
DO125	16.0229	17.1609	18.4145	18.317	13.9788	19.5971	15.484	18.7509	16.9186	19.8834	21.1832	16.8996	17.9113	17.2574	17.8082
DO126	16.7648	17.6158	18.7965	18.661	14.8607	19.8057	16.1586	19.375	17.2201	20.2053	21.3007	16.9275	18.2418	17.5444	17.6939
DO128	18.7423	18.7524	19.068	19.5737	14.1819	20.0355	16.2344	19.4741	17.4731	20.4035	21.5398	13.4676	18.9032	18.3715	17.9297
DO129	16.9926	17.4314	18.3334	18.6852	13.4603	19.3752	15.6575	18.6298	16.6742	19.8418	20.9887	10.1154	18.321	17.9136	17.1428
DO130	17.3155	17.8555	18.7825	18.558	14.0969	19.6252	15.8559	19.2229	17.0985	19.8367	21.1907	16.78	18.1848	17.5474	17.948
DO131	18.5094	18.8842	19.9935	19.7073	15.4498	20.5408	16.754	19.9136	17.8701	20.9636	22.1194	17.0898	19.353	17.8374	18.8198
DO132	15.5341	16.1489	17.7191	17.2889	13.0604	18.4493	14.6002	18.1561	16.084	18.812	20.2171	15.7665	17.3182	16.1364	16.54
DO133	16.4577	17.262	18.7706	18.571	14.8306	19.6179	15.786	18.9349	16.8029	20.0092	21.1841	16.581	18.2361	17.155	17.8307
DO137	15.6412	16.2522	17.9046	18.2591	13.0407	19.0017	15.2617	18.3171	16.2864	19.3884	20.5072	11.7991	18.0034	17.5533	16.7051
DO138	17.7651	18.3266	19.3762	18.7306	15.3603	20.1866	16.6304	19.5257	17.7521	20.7352	22.0155	17.1535	18.8847	17.6856	18.0844
DO140	18.2614	19.0088	19.8359	19.7566	15.9512	20.7493	17.2726	19.7584	17.456	21.1307	22.3206	17.3531	18.673	18.1394	18.7672
DO141	17.5078	18.1359	19.2557	19.0642	15.4084	20.1019	16.471	19.3135	17.2377	20.4523	21.6252	16.9446	18.5298	17.6183	18.5396
DO142	15.7061	16.8229	18.3568	18.0021	13.648	18.8377	15.2387	18.3817	16.496	18.9641	20.4466	16.0561	17.4503	16.6842	17.1737
DO143	17.7917	17.832	18.96	19.2625	14.2409	20.1206	16.2497	19.5316	17.4456	20.3773	21.6158	8.46116	18.9758	18.5415	17.9547
DO144	15.5846	15.8201	17.414	17.8553	12.4815	18.5474	14.8055	18.1878	16.3286	18.8598	20.0935	8.0852	17.4251	17.0227	16.3869
DO145	15.5527	16.8503	18.0366	17.8851	13.7901	18.8297	9.96831	18.2501	16.1616	19.1052	20.3329	16.6978	17.4776	16.9975	17.0405
DO146	15.1128	16.0822	17.9286	17.8083	13.7932	18.7996	15.2473	18.1665	15.9092	19.116	20.2614	16.4862	17.1996	16.2272	16.7734
DO147	17.4734	18.2553	19.6034	19.3076	15.4896	20.2414	16.5428	19.2233	16.9503	20.6198	21.9396	17.1745	18.3405	17.7921	18.4338
DO148	15.7475	16.1206	17.4719	17.3052	13.3686	18.4819	15.004	17.9854	15.9354	18.8013	20.052	16.1003	16.9592	16.6278	16.0806
DO149	19.3365	19.3626	20.1932	19.9166	16.2	20.9605	17.2922	20.1187	17.9537	21.4355	22.6355	17.4063	19.7278	18.1774	19.319
DO150	17.2087	18.169	19.1204	19.0497	14.8844	19.7192	10.9885	19.3596	17.2301	20.3033	21.3509	17.5891	17.7436	17.1229	17.5671
DO151	17.1206	17.4216	18.5231	18.3152	14.1853	19.5175	15.8246	18.6733	16.7739	19.926	21.1688	16.7789	18.2016	17.4277	17.4758
DO152	15.6534	16.6627	18.0533	18.1408	13.5716	18.718	15.0747	18.3883	16.3272	19.0503	20.3477	15.885	17.1696	16.28	16.7303
DO153	18.4047	18.9288	19.6652	19.3286	15.3702	20.2901	16.4469	19.7124	17.6288	20.7048	21.8805	17.1294	18.995	17.7345	18.45
DO154	16.8065	17.669	19.0967	19.1342	14.7929	19.9684	11.9399	19.3749	17.2469	20.3581	21.5203	17.1903	18.4375	17.6663	18.0674
DO155	16.5044	17.3905	18.7185	18.1805	14.3576	19.5288	15.8029	18.7641	16.8458	20.1213	21.263	16.8378	18.2494	17.2855	17.3116
DO156	16.2302	16.1411	17.8061	17.3245	12.9296	18.4518	14.7361	17.9899	15.9784	18.9817	20.3677	15.7914	16.8523	16.2494	16.4578
DO157	16.0317	16.8454	18.1831	17.8579	13.9158	19.2625	15.5511	18.5504	16.7536	19.5977	20.8081	16.7002	17.9279	17.2516	17.5836
DO158	18.6522	19.0266	20.0546	19.5388	15.6788	20.7953	16.7263	20.3446	18.4951	21.2681	22.5266	17.7341	19.4164	18.2617	18.955
DO159	16.9238	16.7343	18.5342	18.2353	13.9345	19.1262	15.4416	18.657	16.4762	19.3512	20.6724	16.2352	17.2295	16.7705	17.4711
DO160	16.8081	17.6015	18.6986	18.4992	14.586	19.6497	15.8585	19.0481	17.0988	20.0461	21.3898	16.9217	18.3473	17.5506	17.8911
DO161	18.3714	19.6176	19.549	19.283	15.5677	20.6301	16.8178	19.7455	17.8112	20.9798	22.3392	17.5509	19.1483	18.0341	18.9414
DO162	18.2048	18.8061	19.3523	19.2	15.1896	20.4182	16.5558	19.738	17.9349	20.7617	21.9814	17.2123	18.8883	17.8315	18.5641
DO163	15.349	15.9589	18.1083	17.664	13.5429	18.7962	15.2242	18.3699	16.2613	19.1012	20.2459	16.0062	17.2942	16.2688	16.6921
DO164	16.4609	16.8804	18.3935	18.1686	14.1226	19.2222	11.9659	18.8305	16.6771	19.7939	21.0649	16.9318	17.9929	17.273	17.0814
DO165	16.4868	16.3064	17.7105	17.5204	13.3274	18.6038	10.5927	18.3115	16.3904	19.0091	20.3461	12.8417	17.5201	17.032	16.2774
DO166	16.1981	16.8668	18.5992	18.2024	14.0494	19.3042	15.6871	18.8824	16.8016	19.7585	20.9873	16.5288	18.0341	16.9962	17.3919
DO167	15.6089	16.1363	18.8043	18.6096	14.3179	19.7277	11.6998	18.8898	16.8264	19.9429	21.0792	13.8336	18.5671	17.9026	17.6125
DO168	17.2757	17.5026	18.7939	18.863	14.3744	19.9442	11.4316	18.7577	16.5594	20.0724	21.5116	16.9438	18.242	17.6426	17.8504
DO169	17.4037	17.9361	18.9162	18.7134	14.9704	20.0166	16.5203	19.0435	17.0726	20.4887	21.8102	17.2128	18.7004	17.9086	17.6023
DO170	17.0433	17.7587	18.6878	18.4135	14.4382	19.399	15.705	18.9326	16.9923	19.8717	21.0686	16.527	18.149	17.0748	17.3963
DO171	14.1378	15.3784	17.3001	16.6172	12.7808	17.8846	14.2974	17.7312	15.9171	18.5811	19.7578	15.9202	16.7075	16.0556	15.4892
DO172	15.7135	16.3612	18.2752	17.9986	13.5696	19.3536	15.6302	18.9966	16.8387	19.6305	20.734	16.7602	17.7303	17.0995	17.2791
DO173	15.9545	17.2052	18.5515	18.6296	13.0642	19.0107	15.2381	18.8362	16.9086	19.3607	20.766	13.1105	17.8252	17.3852	16.806
DO174	15.5585	16.6642	18.6162	18.5085	14.2695	19.4441	15.8047	18.774	16.5536	19.6984	20.9202	16.5577	17.4631	17.1242	17.8095
DO175	14.9978	16.2493	18.3387	18.1602	13.8679	19.2194	15.9386	18.7658	16.7253	19.5258	20.7961	16.6876	17.6955	17.2461	17.2912
DO176	14.828	16.0134	17.9522	18.0965	12.3326	18.8277	14.8897	18.3398	16.3688	19.1631	20.3825	11.596	17.6647	17.3198	16.8016
DO177	14.905	15.9817	18.0716	17.9641	12.6112	18.8226	14.9056	18.5485	16.5686	19.3497	20.4041	10.9651	17.7225	17.2781	16.7048
DO178	15.712	16.4047	18.0331	17.6506	13.3985	18.95	15.3314	18.4884	16.5276	19.3907	20.6096	16.4307	17.5324	16.8998	16.5688
DO179	15.901	15.8442	17.4023	17.549	11.8728	18.1809	14.5518	18.0887	16.2033	18.8263	19.9581	12.4244	17.2522	16.7533	15.8009
DO180	14.6906	15.4794	18.0974	17.6583	13.0213	18.786	14.7434	18.3621	16.3485	18.9458	20.3311	16.0771	17.3633	16.4642	17.0856
DO181	15.8086	16.2366	17.5908	17.0675	13.3058	18.4218	14.8432	18.1363	16.2077	18.833	20.117	16.1974	17.054	16.4689	16.008
DO182	16.1952	16.3698	18.2717	17.9013	13.684	19.0221	11.1121	18.6276	16.4252	19.2693	20.4711	16.8302	17.4089	17.1446	17.3487
DO183	15.1958	16.7089	18.424	18.179	13.5884	19.0091	10.4341	18.5458	16.368	19.2414	20.444	16.7969	17.5159	17.0843	17.3223
DO184	15.005	16.7602	18.4467	17.9918	13.8349	19.132	15.439	18.8006	16.7916	19.5888	20.8713	16.4398	17.1291	16.6489	17.1037
DO185	15.7141	16.2335	17.7063	17.3494	13.276	18.9722	15.3073	18.3948	16.4216	19.293	20.6748	16.5947	17.6254	17.0077	17.0336
DO186	15.6906	15.9493	17.6797	17.6676	12.2359	18.551	14.7801	18.4032	16.4099	18.829	20.0847	13.5088	17.2433	16.9358	16.2392
DO187	15.3087	15.7661	17.7154	17.2497	13.022	18.7222	15.0054	18.3846	16.2259	19.0081	20.4064	15.9458	17.2114	16.3124	16.5475
DO188	14.747	16.612	18.4179	18.1783	13.3557	19.0424	15.0364	18.5661	16.6832	19.2182	20.3784	16.1272	17.0489	16.597	17.586
DO189	15.9247	16.3241	17.7471	17.5266	13.4108	18.6899	11.9637	18.3064	16.2313	19.01	20.2591	16.5273	17.2968	16.8313	16.5482
DO190	15.7394	15.9592	17.7981	17.2017	13.4802	18.6886	10.4383	18.3896	16.3056	18.8572	20.2088	10.3915	17.2524	16.7974	16.6683
DO191	17.8122	18.3337	19.2076	18.825	14.9181	20.2504	16.7205	19.7855	17.7479	20.804	22.0588	17.2019	18.8398	17.7254	18.011
DO192	15.8454	16.3228	17.4639	16.9771	12.9694	18.3511	14.8404	18.0237	16.0597	18.7501	20.0969	16.18	16.9901	16.4499	15.9933
DO193	15.4991	16.0183	17.7876	17.4649	12.6907	18.4226	14.6455	17.9704	15.862	18.7306	19.952	15.731	17.0411	15.9521	16.3447
DO194	15.9688	16.5011	17.9941	17.5078	13.2517	18.5117	14.8999	18.1635	16.0642	18.9631	20.041	15.9348	17.2077	16.096	16.4743
DO195	15.9354	16.1942	17.9977	17.5466	13.6362	18.9836	10.7718	18.7599	16.7128	19.4235	20.6483	10.6722	17.7299	17.3176	16.8826
DO196	16.744	16.4998	18.1313	18.2344	12.7185	18.9644	15.0053	18.6866	16.7198	19.2672	20.2996	10.1141	17.7168	17.3869	16.7991
DO197	16.2468	16.1479	17.5618	17.462	12.9354	18.3409	9.77486	17.9827	15.8829	18.5203	19.942	9.22487	17.1966	16.8077	16.548
DO199	15.081	16.077	18.2154	17.8903	13.2163	19.0408	15.4858	18.5582	16.4496	19.2884	20.7543	16.2374	17.0294	16.6079	17.08
DO200	15.8445	16.5958	17.7944	17.5562	12.8612	18.4612	14.4786	18.0982	16.2167	18.8191	20.2357	15.7683	16.6548	16.2939	16.7765
DO201	15.8134	16.4911	18.0536	17.8103	13.7507	18.8763	15.2264	18.2742	16.2566	19.168	20.5078	16.4834	17.4755	16.8165	16.6441
DO202	16.4113	16.7784	18.0386	17.8433	13.6579	18.9405	15.6741	18.4367	16.28	19.2707	20.6695	16.6077	17.6038	16.884	16.5201
DO203	16.3218	16.9061	18.0947	18.4135	13.1054	19.1112	15.2319	18.7422	16.7932	19.4137	20.7288	12.3432	18.0489	17.7916	17.1048
DO204	15.2474	15.88	17.7628	17.2177	13.4486	18.6026	15.0928	18.1879	15.863	18.9343	20.1607	15.7194	17.1521	16.0499	16.274
DO205	16.2531	16.4879	17.3503	16.9088	13.0827	18.4569	14.9281	18.105	16.1944	18.8647	20.1945	16.2514	17.0646	16.4268	15.9234
DO206	15.6186	15.9353	17.7619	17.451	13.5387	18.6327	10.4234	18.34	16.367	18.9137	20.0661	10.6653	17.308	16.9662	16.5025
DO207	16.8177	16.6013	18.1904	17.449	13.5036	18.8022	10.4215	18.4965	16.4645	19.2702	20.4901	9.23261	17.7502	17.1472	16.2545
DO208	16.5981	16.6572	18.2426	17.8492	13.9219	18.832	10.2634	18.4079	16.3505	19.0742	20.396	9.04152	17.638	17.2207	16.7995
DO209	15.4466	16.4079	17.979	17.5574	13.6852	18.7445	15.3235	18.3886	16.2919	19.1187	20.4343	16.2939	17.1526	16.6137	16.1648
DO210	16.3846	16.5895	17.4865	17.3391	13.0018	18.4228	14.8513	17.9974	16.1247	18.5771	20.0436	16.0948	16.8796	16.5037	16.1579
DO211	15.7415	15.9833	17.718	17.3037	12.9937	18.3271	14.6715	17.8935	15.6994	18.4187	20.071	15.55	16.2688	15.9352	16.2148
DO212	16.3125	16.5928	18.222	18.1741	13.5251	18.8097	15.2413	18.2291	15.9693	18.8977	20.4331	15.9872	17.4048	16.3209	16.9545
DO213	15.0626	15.8318	17.85	17.5814	13.9827	18.9284	15.2226	18.5055	16.5109	19.2043	20.4279	16.5578	17.3565	16.917	16.6976
DO214	15.0506	15.7774	17.6553	17.0443	12.7033	18.3081	14.5701	18.1045	16.2229	18.5518	20.0736	16.2291	16.9577	16.496	16.4545
DO215	14.3901	15.5282	17.502	16.7482	12.0487	18.0199	14.3473	17.7413	15.9132	18.4598	19.9579	16.1093	16.991	16.2307	15.7471
DO216	16.5063	16.8273	17.8946	17.6497	13.5244	18.7173	15.2061	18.3004	16.3769	18.9626	20.3363	16.3135	17.1577	16.8459	16.5861
DO217	15.4668	15.8914	17.609	17.6476	12.5804	18.6978	9.91671	18.2577	16.065	18.8387	20.0955	16.4256	17.086	16.8266	16.741
DO218	15.2222	16.3792	17.8637	17.5116	13.5896	18.6804	10.338	18.4241	16.2297	19.025	20.2459	16.5236	17.2269	16.7118	16.4282
DO219	14.8871	15.4412	17.4835	17.1103	13.092	18.2383	14.8439	17.8835	15.723	18.6486	19.8142	15.6084	16.7489	15.7838	15.9891
DO220	15.7589	16.1159	17.6217	17.5586	13.7118	18.9368	10.3752	18.5892	16.6404	19.392	20.5237	9.6834	17.4944	17.2683	16.8431
DO221	17.1708	18.0969	19.1844	18.9861	14.9503	19.8329	10.922	19.2906	17.1958	20.1349	21.2841	17.0294	18.3263	17.5888	18.1933
DO222	19.9317	20.7211	20.5894	20.3374	16.5471	21.1357	17.59	20.7374	18.6207	21.4834	22.7068	17.7781	19.1738	18.5168	19.421
DO223	17.8137	18.4601	19.9595	19.7443	15.5672	20.7762	16.8495	19.8772	17.8021	21.1195	22.3879	17.2993	18.8617	18.1441	19.1681
DO224	16.6949	16.7042	18.3831	17.9407	14.4611	19.5302	16.3526	18.8536	16.895	20.1586	21.369	16.9574	18.1594	17.3786	16.7665
DO225	18.0351	18.4584	19.0309	18.7961	14.8278	19.8332	16.3224	19.1818	17.0594	20.3191	21.5609	17.0256	18.5422	17.3833	17.6323
DO226	17.6078	18.2489	19.2398	18.9146	15.2628	20.3397	12.1211	19.8041	17.72	20.7171	21.8106	11.4118	19.1215	18.4796	18.2918
DO227	18.3774	19.1635	19.9772	19.6821	15.5268	20.5617	11.831	19.8905	17.811	20.9394	22.0543	17.8475	18.4177	17.6312	18.6321
DO228	18.1812	18.6841	19.6851	19.4077	15.2135	20.4017	16.7342	19.2859	17.2983	20.7455	22.0857	17.3561	18.983	18.1775	18.8137
DO229	16.9947	17.6824	18.7826	18.2783	14.2749	19.5309	15.7059	19.2574	17.3631	20.0051	21.2013	16.8377	18.233	17.2467	17.1922
DO230	17.2531	17.9413	19.2994	19.1764	14.8966	20.2335	11.428	19.4617	17.3945	20.5123	21.7556	17.6611	18.1623	17.5293	18.4749
DO231	18.3792	18.5023	19.5848	19.626	14.826	20.4438	16.6734	19.7081	17.7354	20.9285	22.0608	12.2234	19.3901	18.8943	18.3201
DO232	15.7807	16.0236	17.5873	17.135	12.8903	18.295	14.7499	18.0364	16.0483	18.9322	20.1568	15.6123	16.5339	15.999	16.044
DO233	18.2378	18.8548	19.8338	19.212	15.2447	20.4447	11.5146	19.7131	17.7323	20.8016	22.2398	17.6253	19.2298	18.162	18.8449
DO234	18.0636	18.1488	19.142	19.0041	14.7824	20.0547	16.1491	19.2585	17.0871	20.2075	21.5665	16.8179	18.6428	17.499	18.3668
DO235	17.5304	18.234	19.1375	18.816	14.7089	19.8441	11.7139	19.0414	17.0752	20.1596	21.3487	17.2293	18.4454	17.679	18.1096
DO236	18.9625	19.5604	20.1562	19.8051	15.8195	20.5111	16.8824	19.8423	17.6516	20.8693	22.033	17.4804	18.614	18.1238	19.0418
DO237	18.6413	19.5233	20.2927	19.9299	16.1679	21.1268	17.4312	20.2702	18.3865	21.7432	22.9378	17.7821	19.8076	18.419	19.1969
DO238	15.8433	16.7249	18.3321	18.1947	13.9371	19.4377	15.6621	18.7774	16.7847	19.7275	20.9106	16.7538	17.8266	17.3245	17.5183
DO239	16.2403	16.7198	18.0704	17.7165	13.9713	19.2211	15.3175	18.6859	16.9249	19.6995	20.9446	16.7181	17.8653	17.2081	17.1766
DO240	15.518	16.3075	18.1986	17.942	13.6379	18.8436	15.2662	18.2694	16.1064	19.2254	20.4785	16.0618	16.8103	16.3691	16.6316
DO241	15.7475	16.2656	18.1018	18.358	12.8573	18.8987	15.1878	18.5337	16.4141	19.1467	20.4742	11.1404	17.7581	17.217	16.5049
DO242	18.3581	18.9462	19.5311	19.7241	15.0173	20.4599	16.7124	19.546	17.5141	20.901	21.9922	10.8144	19.4997	18.9982	18.6456
DO243	17.6216	18.049	19.0498	18.5037	14.6254	19.8882	16.3795	19.3024	17.4685	20.4769	21.6272	17.0963	18.5736	17.4471	17.3391
DO244	14.9847	15.8875	17.5768	16.9612	13.0071	18.3997	14.9604	18.0502	16.0871	18.8797	20.1476	16.2479	17.0821	16.6799	16.237
DO245	16.8569	17.5406	19.2703	18.8537	14.9465	20.0254	16.376	19.0976	16.9636	20.2884	21.4425	16.9684	18.6404	17.4389	18.293
DO246	17.7109	18.7394	19.4089	19.0742	14.9278	20.3878	16.5699	19.7061	17.7019	20.916	22.1772	17.1766	18.9845	17.7547	18.3857
DO247	15.8465	16.8786	17.8958	17.4664	13.215	18.5085	9.88431	18.1324	15.9701	18.8116	20.1179	16.5223	17.1858	16.7714	16.6856
DO248	16.9358	17.5575	18.6342	18.498	14.4556	19.5108	10.6162	18.8557	16.6812	19.8208	21.2343	17.0367	18.208	17.5553	17.8572
DO249	15.7761	16.3626	18.2551	17.9777	14.4776	19.4606	16.2488	18.8215	16.7331	19.8813	21.0831	16.8834	17.9543	17.3002	16.8618
DO250	17.3014	17.7415	18.6582	18.0955	14.5821	19.8049	16.3662	19.2935	17.3994	20.4949	21.8568	17.0731	18.5397	17.6423	17.1464
DO251	17.1131	17.5719	19.0685	19.4171	14.1873	20.0442	16.1476	19.4836	17.4785	20.4171	21.495	13.9466	18.8962	18.4992	17.9276
DO252	17.2054	17.6317	18.5036	18.3652	14.1442	19.5633	15.9305	18.7874	16.6794	20.0133	21.1799	16.6237	17.6363	17.1211	17.3954
DO253	14.6838	15.8745	17.3623	17.0456	13.0108	18.1221	14.6109	17.7923	15.9734	18.415	20.0146	16.0083	16.664	16.2841	15.7903
DO254	17.4942	18.1832	19.2192	18.9195	14.8534	20.2861	16.6137	19.3816	17.4824	20.6705	21.8135	17.1013	18.7926	17.6616	18.2987
DO255	14.9945	16.028	17.5582	17.2617	12.5046	18.2253	14.7055	17.9486	15.8498	18.6863	20.1318	15.4777	16.7443	15.8024	15.88
DO256	17.0424	17.7688	18.9116	18.7449	14.9291	19.8195	11.2581	19.3989	17.2289	20.1561	21.4102	10.4436	18.5359	17.7983	18.0038
DO257	18.3439	18.6474	19.5769	19.8377	14.9619	20.636	16.8019	20.0895	18.1292	21.1136	22.134	10.5274	19.5229	19.0728	18.5403
DO258	16.3968	16.8291	17.5452	17.5798	13.2576	18.4695	15.1311	18.0616	16.1185	19.008	20.41	16.2794	17.0318	16.6094	15.9911
DO259	18.6628	18.9327	19.3937	19.4063	14.8532	20.2055	16.1828	19.5628	17.6567	20.5504	21.8839	10.7264	18.9597	18.7559	18.3989
DO260	17.431	17.8197	19.3097	19.0607	15.0468	20.1257	11.7044	19.5934	17.4211	20.5062	21.6652	10.719	19.0019	18.414	17.9941
DO261	17.8461	18.356	19.2225	19.0277	14.8778	19.8811	16.3964	19.1294	17.0441	20.2846	21.4439	16.8651	18.6291	17.387	18.0904
DO262	15.9079	16.4195	17.8557	17.908	13.8422	18.6961	15.0484	18.3087	16.0622	18.991	20.3171	15.6364	16.636	16.2541	16.5467
DO263	18.0758	19.0255	19.6936	19.4711	15.3408	20.389	16.8179	19.7901	17.7342	20.8609	22.1042	17.1232	19.1048	17.7315	18.6936
DO264	16.4775	17.2637	18.427	18.1333	14.0464	19.2012	15.7261	18.297	16.1058	19.6654	21.0103	16.3966	17.3973	16.8446	17.1797
DO265	18.1284	18.7044	19.1421	18.8759	14.8747	20.1141	16.4929	19.633	17.6228	20.6249	21.8539	17.0834	18.8211	17.6057	18.0155
DO266	16.6101	17.0469	18.6595	18.4261	14.1957	19.2373	15.5606	18.7323	16.6856	19.7099	20.9711	16.533	18.0021	16.96	17.3795
DO267	18.591	19.0922	19.3795	19.8003	14.73	20.2684	16.4734	19.6152	17.4288	20.7192	21.6226	11.7774	19.1771	18.8046	18.4391
DO268	18.7252	19.2012	19.6729	19.5015	15.2648	20.5557	16.8043	19.774	17.6187	20.859	22.2225	17.2616	18.7199	17.9718	19.0117
DO269	17.1658	17.5789	18.8867	18.5204	14.9601	19.9422	11.6773	19.159	17.0656	20.2928	21.3462	11.1773	18.4021	18.2563	18.0425
DO270	16.5984	16.535	18.618	18.4791	13.9355	19.5524	15.7809	18.583	16.4942	19.7564	20.9771	16.4389	17.6453	17.1202	17.7842
DO271	15.5925	15.6265	17.7926	17.3611	12.6972	18.4097	14.6207	18.0388	15.95	18.5913	20.0275	15.6686	16.2702	15.9946	16.4356
DO272	14.9708	15.6399	17.099	17.0259	12.4603	18.5896	14.6002	18.0452	16.1761	18.8859	20.2614	16.221	17.0173	16.7097	16.287
DO273	15.5412	15.8697	17.7399	17.7946	12.4689	18.5259	14.7111	18.3332	16.423	18.8434	20.1364	14.9662	17.3573	16.9541	16.257
DO274	15.5417	16.1514	18.0749	17.9817	13.5245	19.1351	10.4876	18.6986	16.6068	19.516	20.5624	16.9209	16.9668	16.5629	16.842
DO275	15.3964	16.099	18.0045	18.0622	13.7517	18.9877	15.5532	18.4882	16.3634	19.2056	20.3746	15.8525	16.75	16.4622	16.7188
DO276	15.1651	16.1811	18.4364	17.7619	13.54	19.0245	15.313	18.589	16.5241	19.3442	20.7285	16.2601	17.8267	16.6636	17.1965
DO277	16.1419	16.2294	18.2628	17.6798	14.0489	18.9642	15.2409	18.523	16.4476	19.2289	20.5992	16.2195	17.0191	16.5813	16.9671
DO278	16.0444	16.2177	18.3745	18.0935	13.3821	19.2193	15.6028	18.8861	16.6787	19.5413	20.8685	16.2947	17.2375	16.9139	17.3674
DO279	15.4767	16.4835	18.5365	18.4052	13.4623	19.0606	10.0679	18.6074	16.6556	19.1565	20.5716	16.6897	17.544	16.9741	17.4722
DO280	15.4149	16.2555	18.6778	18.2599	14.3791	19.5695	11.2488	19.0841	17.0164	19.8017	21.0643	10.5563	18.3145	17.7964	17.6645
DO281	15.5893	16.8732	18.7671	18.4882	14.258	19.4849	15.6388	19.0822	17.0371	19.8381	21.168	16.5123	18.1161	17.0537	17.6653
DO282	15.5987	15.6896	17.4341	16.8711	12.546	17.8472	14.431	17.3848	15.4823	18.1477	19.7583	15.9766	16.634	16.0998	15.4573
DO283	16.3784	16.7	17.3587	16.9229	13.29	18.0256	9.82442	17.2065	15.6683	18.6	19.5576	16.699	16.3943	15.9322	15.8102
DO284	16.6704	16.4682	17.6015	17.5937	13.3147	18.7082	15.2248	18.1796	16.2855	19.0677	20.2975	16.2678	17.1663	16.7481	16.4551
DO285	15.3633	16.1788	18.3814	18.1625	13.5983	19.2419	15.5072	18.8212	16.7657	19.5764	20.7715	16.3279	17.2006	16.7677	17.2578
DO286	14.7772	15.8686	18.3332	18.0032	13.6472	19.0753	15.4235	18.6358	16.549	19.2202	20.5159	16.6588	17.5237	17.1705	17.4921
DO287	16.6796	16.7449	18.4702	18.269	14.0822	19.3032	15.3438	18.9045	16.778	19.6219	20.8775	16.2466	17.9454	16.8409	17.3464
DO288	16.1492	16.3262	17.9107	17.6531	13.6314	19.2623	15.6109	18.7068	16.7173	19.6598	20.7473	16.7189	17.8805	17.1499	16.9977
DO289	16.3098	16.6861	18.0882	18.0044	13.6676	18.8336	14.9807	18.2904	16.4041	19.167	20.5289	16.4433	17.4967	16.9169	16.752
DO290	16.1783	16.0162	17.5933	17.1096	13.0217	18.1605	14.6479	17.8316	15.9655	18.4795	20.0379	16.1065	16.9205	16.2549	15.5591
DO291	15.451	15.8992	17.7921	17.6391	12.8596	18.2864	14.8255	17.7824	15.6936	18.6989	20.2311	15.6885	16.4276	15.8974	16.1396
DO292	15.8048	16.261	17.9334	17.961	12.8085	18.8302	15.2025	18.4949	16.5518	19.3235	20.352	12.6632	17.6062	17.1378	16.378
DO293	15.8997	16.4458	18.7108	18.2831	14.3761	19.9535	11.7509	19.4229	17.3047	20.2919	21.6509	11.7788	18.7538	18.2183	17.8841
DO294	14.5787	15.5614	17.4104	17.1439	13.0428	18.2403	14.5902	17.6509	15.5483	18.3979	19.7229	15.5122	16.6125	15.8381	16.2993
DO295	15.2648	15.7077	17.3984	16.7894	12.7844	18.0918	14.4162	17.7271	15.8986	18.5974	19.9196	15.9283	16.8551	16.2986	15.7519
DO296	15.1995	15.5097	17.2295	16.9778	12.3786	17.9936	14.5992	17.6112	15.6285	18.3636	19.6464	15.8581	16.5467	16.0215	15.6163
DO297	15.1949	16.0299	18.3255	18.0441	13.2472	19.2486	15.2646	18.6731	16.5251	19.4684	20.6455	16.2529	17.0806	16.7832	17.3355
DO298	14.6726	16.6399	18.2017	17.7799	13.2978	18.7848	15.0343	18.4519	16.4394	19.1513	20.4561	16.1287	17.5727	16.4771	17.019
DO299	15.5302	15.9836	17.7511	17.276	13.1794	18.6471	15.1051	18.4316	16.3092	18.9203	20.2868	15.757	16.6026	16.2451	16.5685
DO300	15.4272	16.4813	18.1347	18.2086	13.5158	18.8266	10.8042	18.2849	16.1194	18.9672	20.39	16.747	16.634	16.3107	16.6311
DO301	14.8884	15.8718	17.9035	17.7034	13.3478	18.7939	14.9909	18.3831	16.3095	19.1814	20.4073	15.8239	17.3627	16.3347	16.7763
DO302	15.2416	16.5483	18.1279	18.1452	13.1828	19.1938	15.2521	18.7624	16.8208	19.4158	20.7157	10.8918	18.0856	17.839	17.3706
DO303	15.4717	15.3502	17.5646	17.7967	12.2873	18.6202	14.9037	18.3052	16.2158	18.7487	19.9263	8.06697	17.2094	16.9673	16.385
DO304	15.6637	16.6361	18.5632	18.4347	14.0163	19.4074	10.6166	18.7356	16.6127	19.7323	20.9751	16.8994	17.8037	17.1479	17.4726
DO305	14.5845	15.5284	17.654	17.2845	13.0654	18.5032	14.9813	18.0707	15.99	18.8765	20.0579	15.7169	16.4886	16.094	16.407
DO306	16.3243	15.9074	17.7441	17.4212	13.3365	18.3957	14.9261	18.0169	15.7534	18.7163	20.1633	15.7335	16.4857	16.0785	16.3962
DO307	15.3011	16.6019	18.4093	18.2438	14.0397	19.3808	15.9076	18.7575	16.5439	19.583	20.7718	16.1952	17.7644	16.8937	17.5287
DO308	16.1091	15.9923	18.0263	17.7915	13.9093	18.8723	10.7474	18.427	16.3771	19.0027	20.4619	9.81219	17.6814	17.2238	16.8555
DO310	16.0408	15.8487	17.9587	18.1327	12.417	18.9136	15.2158	18.6296	16.5934	19.22	20.3911	10.2556	17.6126	17.2433	16.5659
DO309	15.192	15.9919	18.0442	17.8143	13.3442	18.9758	15.3212	18.4082	16.3317	19.1047	20.4492	16.074	17.4478	16.5125	17.0644
DO311	14.9025	15.6657	18.0492	17.6288	13.2045	18.9508	10.4228	18.5445	16.4363	19.2587	20.4542	16.6224	17.3288	16.9894	16.9819
DO312	15.1114	15.8119	17.946	17.3491	13.0509	18.654	14.7229	18.3014	16.3286	18.8717	20.1251	15.9319	16.6177	16.3045	16.6697
DO313	15.9361	15.6862	17.5444	17.2754	13.3591	18.5022	10.9263	17.9977	15.9275	18.9827	20.2316	16.4254	17.0863	16.545	16.1309
DO314	16.0299	16.0829	17.4654	17.1951	13.0448	18.4075	9.50175	18.1282	16.0824	18.762	20.1655	16.3305	17.0952	16.7041	16.3701
DO315	15.6209	15.5852	17.3864	16.8737	12.8967	18.0771	14.4567	17.8635	15.7048	18.5346	19.8167	15.4641	16.6304	15.6146	15.7114
DO316	15.8811	16.0591	17.462	16.9577	12.8508	18.1955	14.7352	17.8477	15.8845	18.5669	20.1621	16.1538	16.9031	16.2401	15.7248
DO317	15.0429	16.1078	17.7218	17.4126	13.3442	18.7509	15.2175	18.1208	16.2387	18.9146	20.2552	16.4677	17.1802	16.8444	16.6582
DO318	16.2958	16.4253	18.1257	18.0684	13.7476	19.0279	15.6471	18.3791	16.1469	19.1744	20.4985	16.0342	17.567	16.4925	16.7532
DO319	15.3847	16.1692	18.0212	18.0681	12.8256	18.8651	15.0728	18.6539	16.4709	19.2034	20.4746	11.5913	17.6356	17.2776	16.4862
DO320	15.5058	16.5815	18.2212	18.0142	13.6124	19.0727	15.3433	18.4446	16.351	19.3442	20.5224	16.1546	17.5847	16.6883	17.4601
DO321	17.5066	17.3366	18.4207	18.6788	13.3725	19.1597	15.394	18.889	16.8604	19.4894	20.6472	9.64089	17.933	17.5859	17.0125
DO322	17.1271	17.375	18.9773	18.353	14.0852	19.6091	15.7143	19.1689	17.2267	19.9569	21.2295	16.6873	17.7534	17.2687	17.9538
DO323	16.6675	17.7509	19.0069	18.9	14.658	19.7651	11.5143	19.0089	16.9276	20.1098	21.3671	17.4627	17.7034	17.2085	17.7974
DO324	17.3094	17.9416	19.2054	19.1425	14.794	20.0138	16.3761	19.3765	17.3097	20.4545	21.6523	16.9178	18.1381	17.5723	18.0948
DO325	17.4399	17.7929	19.2362	19.4371	14.3	19.983	16.1694	19.2269	17.2269	20.3925	21.6332	11.3557	19.0361	18.5629	17.9419
DO326	16.5909	17.4956	19.5666	18.8129	14.9707	20.1564	16.1892	19.3967	17.1128	20.4144	21.9392	16.8936	18.9375	17.4755	18.5232
DO327	17.0223	17.6228	18.7786	18.4809	14.6402	19.7446	16.2154	19.0883	17.0343	20.1861	21.373	16.9278	18.4563	17.4331	17.7962
DO328	17.1839	17.7346	18.7586	18.5745	14.6216	19.7053	16.0299	18.7963	16.937	20.1077	21.2991	17.0111	18.2903	17.5977	17.8055
DO329	17.6693	18.1467	19.4074	19.219	15.6419	20.1721	11.6141	19.5082	17.3984	20.7039	21.7604	17.3705	18.6705	17.8912	18.0473
DO330	19.7564	19.7367	20.3129	20.1243	16.3789	20.8005	17.1071	20.0573	17.8503	21.3548	22.5025	17.5132	19.6303	18.1111	19.1431
DO331	18.3476	19.0472	19.358	19.1116	14.9788	19.9783	16.2683	19.434	17.4063	20.5826	21.7534	16.9981	18.2448	17.5548	18.0706
DO332	18.142	18.7673	19.4158	18.963	15.4114	20.3599	16.6262	19.5617	17.5646	20.8476	22.0783	17.3965	18.9231	18.0163	18.5697
DO333	15.6088	16.8326	18.3008	18.3184	13.6452	19.017	10.4158	18.6713	16.6296	19.2299	20.6682	16.8427	17.4617	17.0134	17.0729
DO335	15.1388	15.989	18.1269	17.9852	13.9514	18.9779	11.1685	18.2455	16.1534	19.4559	20.6409	13.0354	17.784	17.2485	16.5755
DO336	19.3902	19.7835	20.53	20.3332	16.5372	21.2489	17.6956	20.1683	17.91	21.6435	22.8565	17.5547	19.8678	18.4894	19.7832
DO337	18.3624	19.3158	19.7475	19.5633	15.5322	20.4567	16.6234	19.5107	17.4514	20.757	22.0016	17.1487	18.9912	17.9602	19.0714
DO338	16.8818	17.2619	18.6747	18.3397	14.1127	19.2409	15.6884	18.8045	16.6953	19.6753	20.9142	16.4321	17.3712	16.8862	17.4548
DO339	17.1438	17.8696	19.258	18.9126	14.9094	19.851	10.9249	19.0665	17.0274	20.2513	21.457	17.116	18.4796	17.6155	18.2704
DO340	15.2077	16.6073	18.1769	17.9905	13.2374	18.9568	15.0323	18.491	16.4413	19.0714	20.4222	16.0511	16.8271	16.6069	17.1614
DO342	17.3202	18.257	19.3093	19.2341	15.1745	20.0533	16.3448	19.4721	17.2955	20.4524	21.7311	17.0053	17.9887	17.4916	18.2738
DO343	15.7268	15.9747	17.5918	17.4166	13.3783	18.6666	15.0757	17.9861	16.0585	18.9249	20.2309	16.3455	17.0563	16.7877	16.4742
DO344	17.9069	18.354	19.0618	18.8209	14.988	20.0633	11.8814	19.4263	17.347	20.4941	21.5586	11.9072	18.9007	18.3966	18.0143
DO345	17.6911	18.2593	19.3391	19.0918	15.5218	20.3829	16.8852	19.624	17.6525	20.9564	22.0497	17.2694	18.8758	17.97	17.9703
DO346	16.2942	16.79	18.4457	18.1445	14.1571	19.5078	15.6319	18.6301	16.738	19.9118	21.0187	16.9759	18.0079	17.3453	17.5237
DO347	15.8235	16.0087	17.7696	17.9355	12.4122	18.5685	14.8868	18.285	16.3948	18.9441	20.2353	12.2839	17.4947	17.0802	16.029
DO348	17.2456	17.4484	19.0196	18.3877	14.3192	19.7727	16.2362	19.0113	16.9561	20.1179	21.5418	16.9101	18.5352	17.3462	17.8216
DO349	16.1194	17.5505	18.9502	18.726	14.5701	19.7678	11.593	19.2806	17.1538	19.8082	21.2218	17.0873	18.0395	17.6489	17.9832
DO350	19.1987	19.8226	20.2291	19.9754	15.5946	20.957	17.0479	20.3304	18.2084	21.4938	22.6678	17.6425	19.1038	18.2787	19.309
DO352	17.5766	18.4387	19.172	18.772	14.9954	20.0668	16.4235	19.4032	17.3975	20.5596	21.7813	17.0915	18.75	17.6609	18.0864
DO353	17.8486	18.2079	19.1993	19.3146	14.9313	20.0974	11.2361	19.6425	17.5019	20.3545	21.5663	17.1043	18.5352	17.9048	18.4162
DO354	15.275	16.2786	17.8026	18.0174	12.3214	18.6089	14.8137	18.3757	16.4563	19.0694	20.2932	10.9876	17.4066	17.1534	16.3798
DO355	18.7614	18.9158	19.5157	19.1842	15.1499	20.2223	16.725	19.6544	17.7249	20.7444	21.959	17.2622	18.383	17.68	18.3262
DO356	16.3602	16.6476	17.7309	17.958	12.4279	18.2019	14.2315	17.9606	15.86	18.662	19.9599	11.663	17.157	16.6379	16.1208
DO357	17.4741	17.4569	18.6625	18.3376	14.2629	19.505	15.9269	18.6659	16.5403	19.9302	21.0036	16.6479	17.6481	17.0809	17.5308
DO358	18.0916	18.7244	19.7356	19.418	15.3945	20.6057	16.5505	19.5806	17.7378	20.9276	22.2121	17.348	19.0903	18.0928	18.8997
DO359	17.4479	18.5568	19.4371	19.3637	14.8835	20.1128	16.3478	19.2608	17.0612	20.3838	21.6885	16.9105	18.0249	17.4132	18.2325
DO360	20.6887	21.2912	19.2828	19.1143	14.6138	20.4231	16.3442	19.6042	17.5831	20.5436	21.8255	17.6531	18.6564	18.0904	18.3707
DO361	17.2848	18.1612	19.05	19.0364	14.7169	19.9934	11.0673	19.2751	17.2564	20.2147	21.4972	17.1613	18.4531	17.7844	18.1337
DO362	17.2676	17.8098	18.8521	18.6211	14.7084	19.7669	15.879	19.2205	17.3795	20.1972	21.4169	16.9719	18.3471	17.4673	17.6296
DO363	16.13	16.0052	17.694	18	12.6694	18.5173	14.8122	18.0435	16.0926	19.0845	20.3533	11.7744	17.6255	17.0306	16.2385
DO364	16.4326	17.299	18.271	17.959	14.2629	19.3784	15.7625	18.9341	16.8717	19.7926	20.9847	16.7878	17.8637	17.3162	17.3394
DO365	16.2858	16.5293	18.3516	18.1244	13.8876	19.1953	15.687	18.5801	16.4338	19.5581	20.8054	16.3187	17.8933	16.7969	17.226
DO366	15.6115	15.9961	17.9141	17.5539	13.3549	18.5544	10.8184	18.0159	15.9348	18.9803	20.3019	16.6555	17.2359	16.7721	16.5237
DO367	18.1531	19.1071	20.0275	19.7382	16.1794	21.0336	17.3921	20.2079	18.1797	21.4501	22.5165	17.4441	19.41	18.3056	19.2674
DO368	16.5488	17.2622	18.7981	18.5998	14.5058	19.6488	15.999	18.9525	16.8674	19.9271	21.2391	16.6475	18.2852	17.2029	17.8472
DO369	16.4526	17.2839	18.8194	18.5586	14.2228	19.3967	15.935	18.649	16.4626	19.8448	21.0771	16.6433	18.2501	17.0907	17.5557
DO370	16.0084	16.7695	18.5394	18.2287	14.3015	19.4879	15.9514	18.644	16.4922	19.8102	20.9932	16.5799	18.0244	17.0151	17.783
DO371	15.4064	15.7371	17.5199	17.4102	12.7549	18.4362	14.3168	18.0906	15.979	18.7014	20.0706	15.5552	16.9295	16.0185	16.3261
DO372	15.1744	15.2759	17.1907	16.9747	13.1585	18.1507	14.7902	17.7767	15.8635	18.6718	19.8606	15.9159	16.8255	16.2942	15.4515
DO373	15.7247	15.9394	17.9393	17.515	13.0111	18.6726	14.9303	18.1854	16.0349	18.8229	20.1936	15.9325	16.5978	16.1817	16.647
DO374	16.0592	16.4361	18.1481	17.9534	13.0248	18.7062	10.4467	18.1645	16.046	18.8869	20.3982	16.6187	17.3899	16.7457	16.6666
DO375	16.5401	16.5225	18.1073	18.358	12.7563	18.9575	14.8841	18.6146	16.5845	19.1963	20.5357	10.9151	17.8107	17.6241	17.1562
DO376	14.7766	15.7455	17.6958	17.297	12.3895	18.1409	14.7454	17.6771	15.461	18.4723	20.1004	15.7263	16.7287	15.6922	15.9167
DO377	14.42	15.3702	17.3235	17.3512	11.5618	17.8553	14.2013	17.7326	15.8272	18.3055	19.7038	12.9196	16.8241	16.3262	15.4292
DO378	16.3714	16.1014	17.933	17.8348	13.4024	18.7513	15.1099	18.4059	16.154	19.0041	20.3473	15.8464	16.4875	16.1935	16.5139
DO379	15.5654	16.0589	17.6218	17.0159	12.829	18.1162	14.5096	17.8499	15.8357	18.4293	19.7827	15.4643	16.1616	15.6682	15.9555
DO380	14.974	16.0212	18.2156	17.775	13.1966	19.0263	15.3255	18.5381	16.3831	19.3273	20.6518	16.2691	17.5563	16.4799	17.044
DO381	15.3934	16.6163	18.6376	18.2906	14.1257	19.3428	15.8359	18.8527	16.6877	19.8033	20.9002	16.5497	17.3034	16.8418	17.18
DO382	16.2012	16.3976	17.9489	17.9893	13.6241	18.7471	10.9749	18.2027	16.018	19.009	20.3914	16.6265	17.3236	16.9059	16.6489
DO383	16.3179	16.4958	18.1327	17.6997	13.1982	18.5188	14.9965	18.0946	15.9982	18.8135	20.1991	15.937	17.0458	16.0922	16.2856
DO384	15.9452	15.7659	17.2627	17.4112	12.0663	17.9746	14.2332	17.7535	15.6958	18.2938	19.7017	10.7877	16.865	16.4668	15.7338
DO385	16.6249	16.365	17.6076	17.211	13.5991	18.614	15.3256	18.3355	16.3041	19.1424	20.3545	16.2374	17.2262	16.7373	16.2223
DO386	15.1858	16.454	18.5058	18.352	13.7942	19.1869	10.1972	18.8236	16.7503	19.361	20.683	16.7343	17.6177	17.0981	17.3504
DO387	16.1937	16.0846	17.8904	17.4999	12.7449	18.5338	14.983	18.1815	15.9918	18.9006	20.2394	15.9154	17.1618	16.2525	16.7705
DO388	17.1189	17.3006	18.7904	18.5639	14.3716	19.639	15.7558	19.028	16.8084	19.9602	21.3201	16.6841	17.6253	17.2127	17.9376
DO389	14.6855	15.6341	17.7978	17.4593	12.8129	18.1906	14.3735	17.6887	15.6623	18.4944	19.926	15.6325	16.4655	15.9447	16.4935
DO390	16.0311	16.7356	18.2536	18.1585	13.6575	19.0809	15.6942	18.3486	16.1789	19.5409	20.78	16.2553	17.289	16.8059	17.231
DO391	15.3879	15.7821	18.112	17.7039	12.9508	18.9779	15.2559	18.3096	16.1666	19.1817	20.6906	16.1389	16.9087	16.4807	16.8647
DO392	15.2491	16.0835	18.2328	18.0053	13.8534	18.9898	10.5719	18.575	16.5348	19.3512	20.6558	10.3919	17.784	17.3935	17.1474
DO393	15.1366	15.2993	17.365	16.9252	12.8732	18.2146	14.9208	17.8618	15.7339	18.4868	19.9897	16.1159	16.8569	16.2941	15.7457
DO394	15.076	15.6333	17.8121	17.686	12.8491	18.6954	14.9846	18.2969	16.1321	18.8975	20.2022	15.8179	16.6585	16.3783	16.8179
DO395	15.4572	15.7611	17.5819	17.3849	12.9451	18.4403	10.3953	17.9562	15.8796	18.8044	20.0718	16.3175	17.0016	16.5717	16.2804
DO396	14.9145	15.8307	17.2443	16.8755	12.6174	18.3679	14.8342	17.8204	15.9557	18.716	19.9477	16.0332	17.0136	16.3478	16.0067
DO397	15.4859	15.9741	17.4165	17.0086	12.8943	18.2994	14.8904	18.0521	16.115	18.5043	20.0649	16.05	16.7857	16.4367	16.0486
DO398	15.6543	16.1607	17.3409	16.9555	12.3452	17.8602	14.2966	17.4595	15.2658	18.0492	19.7004	15.362	15.9663	15.6264	15.9497
DO399	15.4317	16.0476	17.7496	17.5628	13.0726	18.4507	10.9955	18.2066	16.0774	18.6636	20.0998	16.2966	16.9182	16.6666	16.4883
DO400	15.1097	16.0721	17.5189	17.1278	13.033	18.168	9.68885	17.9472	15.8973	18.5296	19.9973	16.2508	16.8615	16.5191	16.2374
DO401	15.0966	16.1967	17.8886	17.6753	13.6039	18.6487	15.2418	18.3057	16.1758	19.0681	20.1955	16.4974	17.3392	16.2308	16.7148
DO402	15.5638	16.6409	18.0465	17.5399	13.3392	18.7667	15.0359	18.3361	16.375	19.3024	20.49	16.5785	17.5241	16.8275	16.8249
DO403	15.2018	15.8225	17.6317	17.5596	12.1401	18.3751	14.4775	18.1145	16.2637	18.7897	19.9868	11.6609	17.2967	16.9642	16.2321
DO404	15.5731	16.3189	17.8776	17.8197	12.4164	18.4682	14.4683	18.144	16.1273	18.7968	20.0677	8.45235	17.2727	16.8983	16.33
DO405	20.4255	21.1787	18.0796	18.0704	13.0371	19.243	9.85171	18.8381	16.8557	19.1531	20.4836	17.0253	17.3258	17.5706	17.3185
DO406	15.6159	16.0583	17.7115	17.36	13.1592	18.3012	14.6148	17.9543	15.8143	18.7304	19.9931	15.6101	17.0065	15.9268	16.0808
DO407	15.8747	16.4469	18.3649	18.1345	13.8555	19.1067	15.5096	18.7137	16.6213	19.4138	20.661	16.2077	17.6982	16.6158	17.0556
DO408	15.5992	16.0284	18.3323	17.7959	14.2273	19.3264	15.9585	18.7824	16.6759	19.8101	21.0656	16.8551	18.0339	17.0706	16.8716
DO409	15.144	16.1186	17.6643	17.3258	13.0139	18.5198	15.0216	17.8896	15.8823	18.7693	20.2193	16.2891	17.0552	16.5943	16.3664
DO410	16.0386	16.5819	18.0052	17.5987	12.9171	18.521	14.6429	18.2117	16.1174	18.777	20.0351	15.8568	16.5957	16.1902	16.9135
DO411	14.413	15.8418	18.1418	18.2271	13.8032	19.3116	15.3433	18.7586	16.738	19.2505	20.5041	16.5338	17.3676	17.0301	17.4701
DO412	15.48	15.8379	17.6287	17.3602	13.3735	18.6285	15.1136	18.0611	16.1666	18.9902	20.2456	16.3256	17.1671	16.7309	16.2708
DO413	14.8244	16.0027	18.0057	17.842	13.5368	18.794	10.0132	18.3174	16.1509	18.9646	20.0856	16.5526	17.0657	16.8422	16.9312
DO414	16.6331	16.6421	17.8977	17.5228	13.3407	18.8297	15.1468	18.4656	16.4758	19.2056	20.4249	16.4872	17.4536	16.8479	16.7324
DO415	15.5173	16.4548	18.1364	17.3572	13.7054	19.0801	15.5756	18.7633	16.8963	19.4964	20.956	16.8442	17.9417	17.1732	17.1765
DO416	15.0994	15.7976	17.5817	17.8358	12.3004	18.4566	14.7054	18.0898	16.0533	18.7767	19.9486	12.3308	17.2784	16.7786	16.0373
DO417	15.5647	16.2245	17.4233	16.9262	12.7468	18.1635	14.5299	18.0072	15.9115	18.5982	19.7837	15.4385	16.2285	15.8485	15.9996
DO420	16.304	16.7106	18.1785	17.8983	13.5292	18.9814	15.028	18.5906	16.5444	19.1741	20.4631	16.6029	17.4907	16.9463	17.0752
DO465	16.6413	16.9776	18.1253	18.2496	13.1501	18.9724	14.9805	18.4366	16.7695	19.5489	20.7312	9.74897	18.0383	17.5882	16.7174
DO466	16.8734	17.7174	18.7082	18.5751	14.2575	19.6138	10.6429	18.9312	16.8109	20.0311	21.237	17.0201	18.1923	17.4389	17.4762
DO467	18.516	19.3472	19.9755	19.6074	15.868	20.6994	16.9488	20.0603	18.0699	21.2095	22.449	17.4339	19.3634	18.1716	18.6027
DO468	17.3496	17.8576	18.6766	18.9117	13.8672	19.4823	16.0066	18.9185	16.9694	20.2097	21.3061	13.0256	18.5165	18.0188	17.1267
DO469	17.9257	18.7306	19.3922	19.1139	14.8556	19.9245	16.0461	19.1889	17.0878	20.3142	21.6921	17.0024	18.1241	17.615	18.3972
DO471	17.4934	17.6682	18.2823	18.1916	14.1947	19.0524	15.3924	18.2662	16.224	19.6024	20.8256	16.3073	17.203	16.8725	17.0411
DO472	15.5511	16.4558	18.3075	17.8092	13.8324	19.1915	15.7985	18.6369	16.7481	19.8392	20.9885	16.9267	18.0043	17.1557	16.7284
DO473	17.1904	18.0611	18.9827	18.6616	14.7255	20.0494	15.9151	19.3527	17.4886	20.2546	21.6322	17.1197	18.4366	17.6451	18.2118
DO474	17.5261	18.3187	19.2848	19.1669	15.3674	20.2082	16.8762	19.6348	17.628	20.6956	21.8531	17.1672	18.723	17.8131	18.0815
DO475	18.6824	19.8494	20.2123	19.836	16.375	21.2048	17.4149	20.2313	18.27	21.7738	23.0008	17.591	19.648	18.3217	19.3234
DO476	17.2851	17.9337	18.5856	18.7376	14.0981	19.5837	15.719	18.9149	16.8576	20.0394	21.0853	13.4943	18.4869	18.0762	17.2941
DO477	17.5607	18.6741	19.0639	18.8161	15.349	19.9814	16.4253	19.033	17.1798	20.578	21.7294	17.0925	18.5874	17.5137	17.8378
DO478	19.6686	20.2632	20.1588	19.6322	16.1247	20.7515	17.0412	20.097	18.2329	21.3535	22.4999	17.5667	19.5595	18.252	18.7811
DO480	15.9025	15.9784	17.5966	17.3745	13.4015	18.1249	14.0697	17.4752	15.8503	18.5293	19.6825	15.5912	16.7257	15.6863	15.5921
DO481	17.5976	17.7966	19.1493	18.8996	14.7695	19.9165	16.0725	19.1786	17.1661	20.232	21.4953	16.8736	18.0025	17.3816	18.1731
DO482	17.9576	18.3405	19.0736	19.1695	14.6432	19.7865	16.0704	19.0053	17.1924	20.3047	21.4422	11.3437	18.8986	18.4486	17.7031
DO483	15.4835	16.4411	18.0451	17.6364	13.6599	18.975	15.3747	18.3034	16.4823	19.3385	20.8529	16.6454	17.6651	17.0919	16.9201
DO484	18.3071	19.0345	19.5671	19.3343	14.6113	20.3048	11.1004	19.8216	17.8519	20.6789	21.8743	17.6379	18.4396	17.6737	18.5264
DO486	16.7801	17.8299	18.6494	18.6401	14.4864	19.6717	15.9531	18.8616	16.9498	20.0508	21.1807	16.8388	18.2034	17.4577	17.5642
DO487	18.0118	18.8792	19.4075	19.3086	15.4809	20.0282	11.2346	19.435	17.454	20.3754	21.5265	17.5878	18.0044	17.4725	18.1628
DO488	17.2816	17.3925	18.5944	18.424	14.5121	19.2603	15.4558	18.4513	16.4418	19.7056	20.9538	16.5393	18.1062	17.0009	17.4263
DO489	18.7242	19.233	19.4541	19.8177	14.9055	20.4951	16.4991	19.5904	17.6534	20.8412	22.0767	12.7328	19.432	19.1655	18.7886
DO490	17.054	17.187	18.0859	17.8346	13.3599	18.4705	9.17102	17.8816	16.1647	18.5645	20.0774	16.5857	17.2595	16.7793	16.7275
DO491	17.141	17.6229	18.7792	18.4446	14.8078	19.4451	10.8476	18.9974	16.9566	20.0018	21.2216	17.2296	18.1963	17.3947	17.3707
DO492	18.6457	18.8984	19.5607	19.2075	15.1388	20.4748	16.8769	19.7117	17.8128	21.0503	22.3164	17.4254	19.1148	18.0494	18.4798
DO493	18.0553	18.5785	19.2515	19.5704	14.784	20.2186	16.3566	19.3038	17.4427	20.6904	22.0143	13.3776	19.2421	18.9519	18.2039
DO494	17.895	18.8158	20.0339	19.9545	15.6423	20.9302	11.6994	19.8645	17.7361	21.1748	22.3497	17.4673	19.3265	18.3525	19.2827
DO495	17.1548	17.7252	18.6024	18.4093	14.2961	19.4124	10.8504	18.9161	16.959	19.8565	20.9749	17.1734	17.4002	16.9292	17.2471
DO496	16.312	16.7365	18.0828	17.7474	13.2825	18.7917	15.327	18.2589	16.1908	19.155	20.4853	16.0384	16.7694	16.4667	16.8915
DO499	16.8756	17.7416	18.9922	18.6976	14.4616	19.6514	10.6624	18.9286	17.0373	19.9294	21.1729	17.1776	18.1967	17.5471	17.8556
DO501	17.6599	18.197	18.966	18.6511	15.3609	19.839	16.2742	19.273	17.2639	20.4499	21.5976	17.185	18.5769	17.801	17.5376
DO504	18.5373	18.7338	19.6744	19.2517	15.3417	20.356	16.7439	19.6971	17.8111	20.7554	22.1741	17.2028	19.109	17.8812	18.4066
DO505	18.5334	18.9991	19.3171	19.6742	14.7789	20.2311	16.2751	19.653	17.5777	20.748	21.8531	13.1149	19.2199	18.8601	18.203
DO506	18.3155	19.0465	19.8147	19.7565	15.742	20.6384	16.8925	19.462	17.301	20.9255	22.2371	17.2632	19.0816	18.0152	18.8356
DO507	17.5196	17.9826	18.8883	18.4946	14.6726	19.6609	15.6435	18.9848	17.2262	20.2993	21.4684	16.9448	18.4044	17.4164	17.0181
DO510	17.8953	18.3297	19.4413	19.1751	15.1307	20.5196	16.587	19.5146	17.5889	20.8236	22.1796	17.2758	19.041	17.9834	18.897
DO511	16.5631	16.5704	17.6208	17.2254	13.3455	18.4921	14.953	18.1007	16.2473	18.966	20.1417	16.3035	17.1342	16.4787	15.8192
DO512	15.0076	15.9849	18.4118	17.8652	14.2473	19.4343	15.8733	18.9502	16.955	19.8067	21.1128	16.9088	18.045	17.3565	17.1399
DO513	14.889	15.6088	17.9377	17.8897	13.6826	18.7384	10.4984	18.2834	16.1258	19.0727	20.4499	8.76331	17.5609	17.0228	16.6052
DO514	16.1203	16.2776	17.7557	17.5801	13.0738	18.5203	9.89075	18.1208	16.092	18.6561	19.8065	16.2439	16.8863	16.6534	16.7025
DO515	16.1836	16.245	17.3849	16.8212	12.8123	18.0924	14.6098	17.6675	15.8673	18.6226	20.0251	15.9771	16.8654	16.2235	15.2816
DO516	16.2929	16.2394	17.93	17.8127	13.348	18.8801	15.1782	18.0058	15.8991	19.1371	20.2368	16.0059	17.408	16.4896	16.9513
DO517	15.0941	16.1865	17.9182	17.7076	13.1818	18.6724	10.6546	18.2862	16.3118	18.8597	20.1109	16.4789	17.1427	16.8061	16.8897
DO518	15.23	15.7263	17.8593	17.5949	13.1649	18.6642	10.3377	18.4233	16.1869	18.873	19.9928	16.4749	17.0191	16.6061	16.4946
DO519	16.5247	16.5287	18.0907	17.6128	13.3871	19.0373	15.4113	18.5371	16.5903	19.298	20.6039	16.1081	17.5804	16.6617	16.9408
DO520	16.4001	16.4226	17.4251	17.3021	13.0962	18.4193	10.4202	18.1887	16.1245	18.8819	20.1697	16.2308	16.9476	16.6216	16.0968
DO521	15.1996	16.1647	18.201	17.9702	13.132	18.9449	15.2528	18.4163	16.2775	19.0606	20.2742	15.999	17.3266	16.343	17.0269
DO522	15.9409	16.3932	18.2215	17.9866	14.0195	19.173	15.3371	18.622	16.565	19.4985	20.7527	16.1607	17.1595	16.7932	17.1351
DO523	15.3509	16.1627	18.0904	17.5559	13.2901	18.5426	14.6493	18.2919	16.1739	18.8338	20.1593	15.8323	17.2026	16.1041	16.5978
DO524	15.2187	16.1428	17.8885	17.8003	13.1702	18.6038	10.5643	17.926	15.9217	18.6288	20.1541	16.5754	17.0727	16.7681	16.964
DO525	15.3086	16.3974	18.2252	18.0482	13.4263	18.9346	9.94316	18.2538	16.189	19.0485	20.3568	16.6357	17.3385	16.9436	16.9876
DO526	16.2873	16.4181	17.418	17.0281	12.8788	18.2914	14.7077	17.9932	16.2004	18.8538	20.0746	16.095	17.0042	16.3377	15.6091
DO527	14.771	15.8475	17.628	17.2145	13.4176	18.6953	15.3389	18.3312	16.3261	19.258	20.3007	16.4221	17.1201	16.6577	16.2045
DO528	14.825	15.5901	17.1758	16.7868	12.6732	17.9943	14.6077	17.525	15.6223	18.4614	19.8202	15.9498	16.6446	16.0572	15.3417
DO529	15.5637	16.1426	17.4194	17.0533	12.7386	18.5432	15.1716	18.2186	16.3368	18.9632	20.2701	16.2168	17.0933	16.5401	15.8886
DO530	15.462	15.9321	17.6878	17.5837	11.9952	18.0956	14.4863	17.8131	15.9136	18.3547	19.9119	11.9542	16.9125	16.6176	15.989
DO531	16.5946	16.6209	18.0408	17.7601	13.4144	18.9379	10.3072	18.5663	16.3769	19.2246	20.4615	16.7048	17.4107	17.0044	16.8082
DO533	15.1002	15.9818	17.6074	17.2255	13.3386	18.6068	15.2153	18.1572	16.1887	19.0422	20.3054	16.4318	17.304	16.7383	16.2592
DO534	14.8664	15.9265	18.0102	17.935	13.2363	19.0772	15.3788	18.455	16.4538	19.2977	20.452	16.4513	17.4125	16.8536	16.923
DO535	15.3199	15.9527	17.8982	17.6596	13.0622	18.6316	14.7936	17.9968	15.966	18.7753	20.2261	15.7438	16.5545	16.2148	16.7506
DO536	16.7014	16.96	17.9663	17.7886	13.527	18.6444	15.2174	18.0763	16.1432	18.9682	20.2158	16.4176	17.148	16.5731	15.9351
DO537	15.8501	16.4364	17.8702	18.1155	12.4041	18.4369	14.7529	18.0222	16.3546	18.8339	20.1675	9.46389	17.5343	16.9466	16.067
DO538	16.4524	16.1942	17.7961	17.3132	13.1942	18.4568	14.7685	18.2299	16.1294	18.7902	20.2222	15.7541	16.4102	16.0586	16.279
DO540	15.8537	16.2518	17.6019	17.2299	13.1244	18.4128	15.0393	17.9364	15.959	18.7341	20.0421	16.1896	16.9636	16.2861	15.4531
DO541	15.4434	16.15	17.276	16.7265	12.77	17.8926	14.4838	17.6185	15.695	18.3081	19.922	16.0025	16.6078	16.0896	15.3956
DO542	16.4888	16.6441	17.9295	17.6265	13.4378	18.4805	15.129	18.0581	15.8805	18.7834	20.2558	15.7569	17.1754	16.0521	16.2983
DO543	15.4883	16.1402	17.4456	17.3016	12.8038	18.195	10.3208	17.8584	15.7917	18.4875	19.8306	16.1608	16.8445	16.3317	16.115
DO544	16.1391	16.6189	17.7217	17.5285	12.9923	18.3772	9.65036	17.908	15.9048	18.489	19.8413	16.3436	17.0301	16.5897	16.7253
DO545	15.9674	16.529	17.8139	17.444	12.8537	18.4076	9.85892	18.1246	16.0136	18.6073	20.0577	16.4171	17.0882	16.6296	16.6219
DO546	15.1591	15.8254	17.4282	17.2123	13.1506	18.268	10.0848	18.0485	15.9473	18.6721	19.9094	16.1808	16.6384	16.3989	15.8933
DO547	15.3972	16.3652	18.1835	17.9031	13.5701	18.6728	15.1963	18.1472	15.9298	18.9891	20.511	15.978	17.3868	16.2952	16.6211
DO548	14.6773	15.4309	17.5421	17.5605	13.1251	18.3006	14.8635	17.6549	15.4433	18.6542	19.8475	15.5624	16.7606	15.771	15.9171
DO549	15.027	16.401	18.7341	17.7908	13.9966	19.0924	10.9929	18.7057	16.6293	19.5472	20.9722	10.9222	18.2796	17.5222	17.1286
DO550	14.7349	15.8901	17.7418	17.4802	13.0586	18.5555	10.0796	18.2093	16.1119	18.8367	20.0544	16.5167	17.0591	16.7277	16.5079
DO551	16.2461	16.8857	18.1986	18.1398	12.5155	18.9734	14.5967	18.6449	16.8312	19.188	20.3321	9.84267	17.6316	17.4122	17.1916
DO552	15.7952	15.955	17.4645	17.1221	12.5292	18.3528	9.77647	18.0834	15.9114	18.7568	19.8471	16.3807	16.2974	15.8037	16.2617
DO553	16.0489	16.3602	18.0679	17.6617	13.4878	18.6575	15.0552	18.3149	16.1472	19.2226	20.3746	15.9209	16.8103	16.3051	16.4005
DO554	15.4765	16.0826	17.7191	17.0009	13.0024	18.4456	14.6719	18.2119	16.0365	18.8063	20.1385	15.7831	17.0883	16.1981	16.5492
DO555	15.5127	15.8328	17.1143	16.7761	12.3518	17.9694	14.4522	17.5017	15.6703	18.336	19.6163	15.8482	16.5541	16.0539	15.4428
DO556	14.6614	15.501	17.6678	17.2798	12.5639	18.229	14.4989	17.7975	15.6645	18.5368	19.9064	15.7143	16.3739	15.7854	16.1271
DO557	15.2508	16.2646	18.0416	18.2638	12.7272	18.7032	14.9949	18.3013	16.4094	18.9622	20.4213	14.0295	17.6015	17.2034	16.3926
DO558	15.6529	16.3823	18.0074	18.2412	12.6382	19.0145	15.1722	18.4386	16.5467	19.0872	20.3634	10.1151	17.676	17.4249	16.8845
DO559	16.0873	16.5394	17.7635	17.5312	13.2323	18.6572	14.9911	18.0617	15.8692	18.9811	20.0894	15.7932	16.9718	16.1746	16.2329
DO560	15.9203	16.9674	18.482	17.8474	13.8503	19.2855	15.2929	18.8281	17.0552	19.7598	20.9908	16.829	18.0855	17.134	17.312

## Sheet: 2c. islets
DO mouse	mt-Rnr1	mt-Rnr2	mt-Nd1	mt-Nd2	mt-Nd3	mt-Nd4	mt-Nd4l	mt-Nd5	mt-Nd6	mt-Cytb	mt-Co1	mt-Co2	mt-Co3	mt-Atp6	mt-Atp8
DO021	11.1251	12.939	16.1084	15.6903	13.3632	17.3344	12.8314	16.8609	14.9146	17.446	18.6759	17.0047	17.2854	17.2868	10.0251
DO022	11.5056	12.9731	17.0418	16.2686	14.5968	17.8593	13.3683	17.3933	15.3841	17.8574	18.9932	16.8827	17.9831	17.6386	11.5851
DO023	12.292	13.7963	16.7647	16.2762	13.7658	17.5029	11.6372	16.9863	15.2241	17.4801	18.8653	17.3344	17.7697	17.933	11.1629
DO024	12.7054	14.4912	16.9212	16.5404	14.0493	17.6418	11.8501	17.1127	15.2475	17.5962	18.8526	17.4971	17.7935	17.9414	11.2218
DO025	11.7419	13.6157	16.9736	16.7706	13.8962	17.9912	12.9712	17.4471	15.7046	17.851	18.9368	16.4784	17.6225	17.1217	10.3126
DO026	11.6252	13.2957	16.7563	16.2874	13.7463	17.3359	11.4798	16.7398	15.0101	17.2691	18.6168	17.2172	17.4617	17.5958	11.1309
DO027	11.0781	13.0829	16.0581	15.774	13.4757	17.2269	12.7885	16.7676	14.7831	17.5244	18.6103	17.1091	17.3192	17.4802	11.1114
DO030	11.9973	13.5233	16.6471	16.192	13.5693	17.3316	11.6025	16.7741	14.9937	17.2619	18.5745	17.1515	17.3791	17.6129	10.8394
DO031	11.9498	13.511	16.2366	15.8554	13.8871	16.9456	12.6897	16.7319	14.737	17.0911	18.27	16.9071	17.1163	17.0594	12.7666
DO032	11.1233	13.215	15.8911	15.5821	13.1063	16.9321	12.2757	16.4037	14.5533	17.0822	18.2953	16.6488	16.824	16.9173	9.38773
DO033	11.8021	13.6976	16.4722	16.1127	13.6559	17.205	11.6714	16.7727	14.9872	17.152	18.4594	16.9857	17.2733	17.4525	10.9253
DO034	10.9705	13.1783	16.2433	15.8202	13.5645	17.3011	12.7913	16.609	14.6769	17.4421	18.5695	17.0439	17.3307	17.4388	10.6045
DO035	10.6498	13.4	16.5867	16.2714	13.4918	17.328	12.8565	16.792	14.9048	17.3545	18.4889	17.125	17.3404	17.5881	10.8165
DO036	12.4181	13.3738	16.4349	15.5315	13.8128	16.9775	12.3088	16.4311	14.533	17.0919	18.4913	16.4289	17.4869	17.0125	11.135
DO037	11.7552	13.2202	16.2157	15.6981	14.0394	17.1898	14.0713	16.778	14.6701	17.4051	18.4928	17.1143	17.3254	17.1448	12.7782
DO038	11.3842	13.0025	16.1198	15.6169	13.3978	17.1718	12.6709	16.528	14.5904	17.3767	18.5464	16.9864	17.2341	17.3275	10.5531
DO039	11.2169	13.1171	16.3354	15.9155	13.4288	17.1911	12.7871	16.7892	15.0096	17.0273	18.3669	16.8512	17.1583	17.3503	10.7012
DO040	11.8133	13.5527	16.4112	16.0504	13.387	17.2064	11.2716	16.7233	14.9034	17.147	18.4913	17.0389	17.2643	17.479	10.7363
DO041	10.8036	13.3197	16.5695	16.3795	13.5171	17.4436	11.8842	16.9777	15.1102	17.4519	18.5454	17.1319	17.3426	17.6363	10.5307
DO042	11.5519	13.2718	16.3429	15.9825	13.807	17.4652	13.2588	16.8507	14.8485	17.5668	18.7532	17.2078	17.4856	17.7411	11.3898
DO044	11.4059	13.6568	16.4937	16.4919	13.8842	17.5245	14.3195	16.8798	14.8385	17.427	18.5587	16.3311	17.4169	16.8983	12.8077
DO046	12.0649	14.0949	16.5517	16.3327	13.6666	17.3022	11.3584	16.7485	14.9535	17.3697	18.5899	17.1493	17.5104	17.5489	10.152
DO047	11.1859	12.8124	16.0183	15.7096	13.5547	17.139	12.7787	16.5438	14.6578	17.3739	18.4303	16.956	17.1911	17.3243	10.8984
DO048	11.5381	13.5203	16.4025	15.9903	13.4753	17.1897	11.2896	16.6629	14.9359	17.239	18.4637	17.1644	17.4525	17.5389	10.9268
DO049	11.6626	13.7191	16.3812	16.1253	14.3007	17.5099	14.4119	17.0784	14.95	17.6524	18.7136	17.3268	17.5314	17.5232	12.8003
DO050	10.9386	13.188	15.8425	15.4859	13.53	16.8856	13.7607	16.3273	14.1648	17.1042	18.2336	16.7755	16.9454	16.8776	11.9412
DO051	10.9543	12.6514	16.0327	15.7724	13.5541	16.8069	12.3943	16.4743	14.3451	16.9841	18.2075	16.7876	17.0144	16.992	12.0505
DO052	11.6194	13.4186	16.7115	16.2668	13.6061	17.489	11.6701	16.911	15.0582	17.3928	18.6024	17.1829	17.4756	17.7219	10.9744
DO053	11.1765	13.0709	16.1538	15.8905	13.2877	17.0995	12.5761	16.6509	14.8036	17.0824	18.3293	16.8178	17.0535	17.2732	10.7466
DO054	11.0104	13.3681	16.3488	16.0669	13.4306	17.1095	12.7865	16.795	14.9736	17.1416	18.3228	16.8445	17.1618	17.3683	10.9055
DO055	11.8085	13.5144	16.4968	16.1388	13.6224	17.2687	11.4535	16.7874	14.8942	17.3278	18.5875	17.1632	17.4259	17.6038	10.9246
DO056	11.2614	12.9678	16.1716	16.0271	13.0341	17.2423	12.4238	16.6297	14.7777	17.1404	18.2564	16.1771	17.0603	16.7062	10.2903
DO057	11.6798	13.3414	16.1069	15.6421	13.5579	17.1119	12.6193	16.404	14.6543	17.3597	18.4639	17.0827	17.2966	17.3656	11.017
DO058	11.8297	13.912	16.5755	16.1264	13.6736	17.2344	11.648	16.7527	14.9367	17.1473	18.5019	17.098	17.3242	17.5047	11.1398
DO059	11.1935	13.1648	16.5697	16.2004	13.6647	17.299	12.9666	16.811	14.9623	17.2324	18.4561	17.0445	17.3004	17.5397	10.9656
DO060	11.7408	13.3442	16.3735	16.2678	13.4855	17.3649	11.4967	16.934	15.0843	17.2391	18.5514	16.9823	17.1721	17.5285	10.6821
DO061	12.1873	13.5708	16.2918	16.2451	13.3794	17.4731	12.7152	16.593	14.8314	17.4115	18.5904	16.3798	17.4949	16.9324	10.9365
DO062	12.2307	14.2037	16.5838	16.2792	13.6653	17.3358	11.7199	16.8636	15.0891	17.2631	18.5461	17.0832	17.4232	17.6272	11.0939
DO063	11.4864	13.452	16.3155	15.9664	13.5842	17.3425	12.7989	16.7191	14.7523	17.3914	18.5141	16.9538	17.2017	17.3847	10.929
DO064	10.9148	13.4259	16.5232	16.275	13.6272	17.4915	13.014	16.9271	15.0234	17.3977	18.4871	16.5232	17.3101	16.88	10.7748
DO065	11.2163	13.3234	16.0935	15.809	13.9152	17.2267	14.1183	16.6939	14.5907	17.4375	18.5442	17.0947	17.3425	17.2819	13.126
DO066	11.4294	13.4582	16.4696	16.145	13.4938	17.3205	12.7081	16.8566	15.0871	17.274	18.4944	17.0236	17.3563	17.5614	10.8472
DO067	11.3933	13.3694	16.4097	16.2095	13.8565	17.3305	13.9703	16.853	14.8023	17.3124	18.4088	16.234	17.1963	16.7409	12.1321
DO068	10.8632	12.9801	15.9712	15.6468	13.4181	16.9722	12.6555	16.5748	14.6581	17.2178	18.3573	16.7491	16.9762	17.1536	10.7915
DO069	11.7835	13.698	16.2879	15.823	13.8769	17.396	13.1029	16.8534	14.8798	17.5482	18.6651	17.1372	17.4275	17.5392	10.9768
DO070	11.8657	13.506	15.9934	15.6867	13.2293	16.9194	12.3668	16.4925	14.6376	16.8396	18.1494	16.5995	16.9214	17.1078	9.62583
DO071	11.6903	13.6389	16.5978	16.1965	13.7419	17.289	12.2316	16.7606	15.0356	17.3031	18.4892	17.0543	17.3841	17.4753	11.2382
DO072	12.2207	13.4253	16.2606	15.6526	13.2138	16.9011	11.0671	16.3743	14.5753	17.022	18.3517	16.9647	17.3733	17.3584	10.7062
DO073	11.6338	13.6686	16.6576	16.2995	13.5537	17.3549	11.4412	16.7677	14.9967	17.2515	18.6171	17.1287	17.4571	17.6077	11.0496
DO075	11.6209	13.1185	16.4059	15.8922	13.5273	17.2321	12.3158	16.8401	14.847	17.3327	18.5077	17.0871	17.3518	17.3523	12.1626
DO076	12.0508	13.7033	16.7187	16.3856	13.5571	17.4688	11.5243	17.0631	15.2699	17.3295	18.6051	17.0418	17.4186	17.6122	10.6649
DO078	11.8464	13.5508	16.3749	15.9826	13.8783	17.3812	12.9761	16.79	14.9396	17.5738	18.6376	17.0948	17.3798	17.4769	11.0574
DO079	13.3157	15.592	16.533	16.3922	13.8588	17.4721	12.8942	16.8853	15.1852	17.4721	18.5506	16.6099	17.4676	16.9882	11.0786
DO080	10.984	12.7676	15.8178	15.6646	13.2551	16.9555	12.4974	16.4857	14.5747	17.2497	18.4687	16.7601	17.0205	17.2645	10.762
DO081	11.3678	13.3859	16.5537	16.1345	13.5712	17.3547	11.5266	16.8074	14.9807	17.3024	18.5161	17.0699	17.3403	17.5297	10.7823
DO082	11.2941	13.2652	16.3076	15.9851	13.6285	16.9981	12.482	16.669	14.636	17.1053	18.2537	16.9161	17.1452	17.152	12.0028
DO083	11.1714	12.9403	16.1843	15.8463	13.6622	16.9328	12.5078	16.4567	14.4617	17.0311	18.2538	16.932	17.1277	17.0587	12.745
DO084	11.8281	13.1731	16.4354	15.9578	13.3669	17.2457	11.4703	16.725	14.9232	17.1767	18.428	17.0217	17.3924	17.5291	10.8085
DO085	11.5071	12.9925	16.0102	15.6493	13.0844	17.0976	12.8168	16.5858	14.6704	17.1488	18.2948	16.8083	17.208	17.3463	10.6196
DO086	11.7438	13.4642	16.1641	15.7935	13.7707	17.2501	12.9479	16.5668	14.749	17.3552	18.4512	16.9875	17.2775	17.4652	11.1028
DO087	11.2095	13.2638	16.1546	15.7842	13.5384	17.2684	12.7555	16.749	14.8445	17.4299	18.5938	16.9722	17.2306	17.3555	10.9344
DO088	12.0618	13.0386	16.296	15.9243	13.2927	17.085	11.0064	16.0815	14.3381	17.0407	18.4686	16.8941	17.6079	17.8515	10.8736
DO089	11.9279	12.8907	16.3778	15.8418	13.3886	17.1915	12.7273	16.6184	14.8065	17.2916	18.511	17.1577	17.4063	17.5772	11.1918
DO090	11.9458	13.3635	16.3845	16.0894	13.3819	17.385	12.8946	16.7133	14.7457	17.2185	18.4971	16.4588	17.2289	16.8172	10.7348
DO091	11.5691	13.3335	16.5402	16.2554	13.6055	17.6354	13.4274	16.9438	14.9336	17.5544	18.7134	16.5694	17.4165	17.0342	10.8329
DO092	11.4254	13.029	16.4555	16.0084	13.2119	17.2086	11.457	16.6074	14.6488	17.1785	18.3783	16.9755	17.253	17.3354	10.2782
DO094	12.2678	13.9351	16.5014	16.1764	13.6565	17.5312	13.0045	16.9354	15.0281	17.436	18.5356	16.4732	17.3271	16.9472	10.8158
DO095	12.3238	13.7324	16.3901	15.9067	13.5274	17.0878	11.2339	16.4717	14.6532	17.1794	18.4896	17.0278	17.4306	17.5112	10.0255
DO096	12.2368	13.5012	16.3401	16.305	13.4357	17.5198	12.9276	16.4762	14.6022	17.5314	18.628	16.6811	17.7177	17.2151	11.3
DO097	10.978	12.2075	16.6908	15.9297	14.0995	17.3956	12.5948	16.9406	14.8431	17.44	18.5713	16.4382	17.5287	17.1112	11.263
DO098	11.863	13.5927	16.4281	16.0545	13.4265	17.2165	11.3626	16.7303	14.9758	17.1988	18.5555	17.094	17.443	17.5444	10.8318
DO099	11.7179	13.5291	16.1986	15.9505	13.5758	17.1594	12.8202	16.7493	14.8924	17.1749	18.4151	16.996	17.2853	17.4343	10.9142
DO100	11.4383	13.0939	16.0295	15.8294	12.4698	17.1906	12.039	16.5037	14.5468	16.943	18.1981	16.0226	16.8861	16.6582	9.41385
DO101	11.3257	13.2478	16.0648	15.8611	14.044	17.1147	14.0057	16.7045	14.5641	17.3709	18.3644	16.9303	17.2157	17.0913	12.9775
DO102	11.6881	13.3608	15.8403	15.5041	13.5116	16.5578	12.2571	16.1969	14.0931	16.7041	18.0709	16.7349	17.0056	16.7486	12.4699
DO103	11.2338	13.5507	16.3563	16.0008	13.3306	17.0222	11.2536	16.4949	14.726	16.942	18.1895	16.775	17.0275	17.2338	10.773
DO104	11.4372	13.1714	15.8997	15.8928	12.9999	17.0316	12.5068	16.3669	14.4188	16.9381	18.184	16.0022	16.9759	16.5393	10.4132
DO105	12.1099	13.6468	16.0851	15.624	13.2261	16.8387	11.1019	16.3778	14.5854	17.013	18.3208	16.972	17.273	17.3641	10.6912
DO106	11.9683	13.5224	15.9784	15.5963	13.52	17.0484	12.6963	16.5588	14.7389	17.1587	18.3217	16.8233	17.0696	17.2293	10.6106
DO107	11.2493	12.9826	15.8472	15.3591	13.4134	16.8927	13.1871	16.3718	14.2311	17.1823	18.0762	16.6136	16.8781	16.8771	10.7095
DO108	12.9012	14.6319	16.8114	16.2197	14.3186	17.6339	11.7414	16.6092	14.7951	17.6582	19.0607	17.5989	18.2473	18.2669	11.6328
DO109	12.1058	13.753	16.7425	16.1926	14.2415	17.6797	11.8035	16.6718	14.8852	17.5531	18.9215	17.4459	18.1194	18.3015	11.6034
DO111	13.2124	14.9365	16.6526	15.8904	14.7424	17.8867	13.5002	16.475	14.6365	18.0936	19.1747	17.7434	18.4394	18.5283	11.9012
DO112	13.1042	14.3338	16.6539	15.9711	14.7219	17.9378	13.5095	16.7452	14.8549	18.0196	19.0348	17.5891	18.0869	18.1444	11.8603
DO113	11.3795	12.915	16.4012	15.9753	13.7887	17.5275	12.9943	16.8938	14.9189	17.6324	18.7558	17.2071	17.4683	17.6519	11.0634
DO114	11.2072	13.0874	16.2542	15.8276	13.7143	17.4175	12.8292	16.8162	14.8813	17.5699	18.6583	17.1139	17.3982	17.5787	10.8356
DO115	12.6573	14.0946	16.3895	15.9896	13.3533	17.1112	11.2049	16.5008	14.7645	17.0005	18.4338	16.9276	17.2726	17.4759	10.7284
DO116	12.0625	13.5484	16.4316	15.9926	13.5615	17.1427	11.4304	16.5622	14.7118	17.1089	18.3966	17.0051	17.2868	17.4499	11.0119
DO118	11.9067	12.5477	15.9355	15.0076	13.44	16.9288	12.3312	16.4281	14.5263	17.0971	18.2213	16.2532	17.3008	16.8482	10.8795
DO119	12.0161	13.0618	16.6013	15.9225	13.7875	17.5929	12.8275	17.194	15.1743	17.646	18.8843	16.7235	17.7745	17.2936	11.1155
DO120	11.9782	13.2422	16.1856	15.7489	13.2224	17.0715	11.2345	16.7352	14.9701	16.9877	18.4218	16.9412	17.0861	17.3152	10.6053
DO121	11.2516	13.6904	16.85	16.3543	13.7604	17.5372	11.8713	17.0758	15.0804	17.5501	18.8458	17.3941	17.6987	17.8438	11.3025
DO122	11.4365	13.4949	16.5665	16.1837	14.1869	17.6603	14.2192	17.2067	15.0007	17.8484	18.8307	17.4468	17.631	17.5958	11.6441
DO123	11.4395	13.1713	16.4773	16.1513	13.831	17.6256	13.0415	16.9896	15.0319	17.7628	18.9646	17.3116	17.6176	17.7579	11.1409
DO124	11.3738	13.4842	16.6185	16.0985	13.3649	17.454	11.6445	16.9933	15.0715	17.4889	18.6969	17.3116	17.6042	17.6506	10.7671
DO125	11.0583	13.3306	16.4943	15.9924	13.9117	17.5743	13.1583	16.9511	15.097	17.6747	18.8963	17.412	17.626	17.7763	11.2361
DO126	11.3852	13.3185	16.364	15.9269	13.6252	17.4348	12.7376	16.9746	15.0412	17.6548	18.7939	17.1897	17.506	17.5511	10.6225
DO128	10.9987	13.2903	16.6195	16.5695	13.579	17.636	13.3208	16.9687	15.0319	17.588	18.7688	16.7156	17.4826	17.113	11.0667
DO129	11.0603	13.1614	16.4964	16.2025	13.5093	17.4669	12.923	16.8426	14.9432	17.4362	18.5871	16.4436	17.3403	16.8718	10.9028
DO130	11.1416	12.6105	16.147	15.7061	13.1211	16.9639	11.3528	16.4876	14.666	17.0393	18.3492	16.8552	17.2113	17.4352	10.8584
DO131	10.9649	12.8378	16.4601	16.0097	13.2861	17.1221	11.23	16.6739	14.8748	17.1016	18.5542	17.0393	17.3558	17.5228	10.7964
DO132	11.72	13.3644	16.5496	16.0698	13.3394	17.3253	11.4367	16.7829	14.9269	17.2486	18.6662	17.2553	17.5464	17.6705	10.7249
DO133	11.6875	13.4803	16.8551	16.4107	13.931	17.4859	11.7719	17.0244	15.158	17.4584	18.7368	17.3537	17.6221	17.7769	11.1644
DO137	11.5287	13.188	16.6552	16.4214	13.6121	17.6891	13.2188	17.0268	15.0019	17.4943	18.6521	16.5151	17.4824	17.0576	10.9485
DO138	11.6261	13.262	16.3399	15.762	13.6106	17.3229	12.7475	16.8853	15.0028	17.5174	18.5578	17.0523	17.2984	17.3884	10.6603
DO140	11.4069	13.1201	16.4565	15.9875	13.4185	17.1116	11.4312	16.6021	14.6019	17.0824	18.5104	17.0146	17.3188	17.4363	10.7855
DO141	11.4728	13.154	16.3809	15.8946	13.5183	17.0267	11.3651	16.7115	14.8855	17.0577	18.3147	16.9312	17.1919	17.2844	10.6282
DO142	10.8697	12.639	16.2093	15.8205	13.216	16.8921	11.369	16.453	14.4982	17.0194	18.2701	16.8477	17.1721	17.3043	10.8109
DO143	11.1968	13.0857	16.2941	16.1944	13.0577	17.578	12.6067	17.0221	15.0583	17.3774	18.5159	16.2396	17.2429	16.8629	9.82682
DO144	10.9808	12.7962	16.2059	16.2333	13.695	17.3792	14.0859	16.8576	14.729	17.441	18.5414	16.3724	17.2636	16.847	11.8366
DO145	10.8054	12.6561	16.1531	15.6413	13.3139	16.9691	13.1692	16.5131	14.424	17.0864	18.2748	16.9711	17.2152	17.1929	10.5475
DO146	10.8905	12.8153	16.4769	16.1163	13.375	17.153	11.2889	16.7081	14.9547	17.1589	18.3745	16.895	17.1987	17.396	10.6846
DO147	10.8362	13.2274	16.7445	16.2163	13.6595	17.3077	11.6917	16.852	15.0553	17.2462	18.4912	17.1387	17.4289	17.5865	11.2002
DO148	11.1195	12.7049	15.8896	15.3571	13.1884	16.9962	12.8344	16.5034	14.3975	17.2487	18.2838	16.7581	17.0276	17.0427	10.504
DO149	11.1607	13.1049	16.5834	16.0073	13.4223	17.2275	11.3742	16.7824	15.021	17.1713	18.6444	17.1145	17.3615	17.5146	10.9079
DO150	11.2012	13.4539	16.7049	16.2648	13.7389	17.5666	12.9992	17.1658	15.3592	17.5152	18.7712	17.4039	17.6629	17.7514	11.075
DO151	11.0699	13.1307	16.179	15.601	13.2593	17.1639	12.9191	16.6027	14.5052	17.3868	18.4803	16.9796	17.2926	17.2257	10.6132
DO152	11.7829	13.2958	15.9474	15.8497	13.589	16.8532	12.6274	16.2912	14.2224	16.9851	18.3273	16.8855	17.1002	17.0672	13.4773
DO153	11.7874	13.822	16.7886	16.4089	13.6563	17.4822	11.5975	17.0473	15.241	17.3707	18.6636	17.2303	17.5906	17.6814	11.1284
DO154	11.1136	13.3263	16.3616	16.309	13.8698	17.3406	13.9195	16.9384	15.0716	17.3479	18.7103	17.1175	17.4078	17.5652	12.4902
DO155	12.0368	14.0341	16.7192	16.5372	14.0213	17.9133	13.6027	17.3679	15.4532	17.9033	18.9406	17.4012	17.6987	17.8741	11.0922
DO156	11.6795	13.5228	16.6398	16.2246	13.4472	17.2681	11.408	16.7572	14.9873	17.2127	18.5715	17.1326	17.3983	17.6927	11.1162
DO157	12.0203	13.7255	16.4272	15.6899	13.7372	17.3145	12.885	16.8524	14.8961	17.4273	18.585	17.2057	17.4484	17.4723	10.947
DO158	11.8537	13.7355	16.4656	15.9677	13.6537	17.3825	12.8015	16.9355	15.0356	17.5821	18.6431	17.1615	17.4129	17.4734	10.6551
DO159	11.7389	13.4943	16.6333	16.0557	13.5685	17.3047	11.5948	16.9565	15.104	17.3242	18.5569	17.2274	17.5332	17.6548	11.0991
DO160	11.8335	13.5688	16.4484	16.0466	13.7359	17.4578	12.9348	16.8062	14.899	17.5946	18.8011	17.3041	17.5252	17.7038	10.9953
DO161	11.5851	13.3676	16.1602	15.6177	13.539	17.2027	12.7777	16.6592	14.6972	17.3497	18.5074	16.9118	17.2222	17.3374	10.5521
DO162	11.8015	13.286	15.6205	15.2107	13.4431	16.7687	13.2459	16.2062	14.1534	17.1186	18.1277	16.8052	16.9554	16.8765	11.2006
DO163	11.7635	13.062	16.5486	16.0136	13.4255	17.2099	11.3843	16.6942	14.9796	17.0727	18.4315	17.093	17.3973	17.5007	10.6819
DO164	12.1455	13.776	16.3689	15.9123	13.7342	17.2232	13.0079	16.813	15.0415	17.1574	18.5623	17.191	17.5145	17.5272	11.2181
DO165	12.3401	13.086	16.3579	15.5785	14.1828	16.9702	11.5385	15.917	15.0946	17.285	18.4759	16.7717	17.6894	16.9831	10.5672
DO166	11.8556	13.3002	16.256	15.8791	13.5974	16.9858	12.3387	16.71	14.6655	17.0512	18.3666	16.9879	17.2205	17.2091	11.3121
DO167	11.4953	12.863	16.5607	15.8164	14.2541	17.2191	13.7714	17.1367	14.9331	17.3749	18.4717	16.3836	17.4849	16.8132	12.1837
DO168	12.0273	13.5788	16.0413	15.9117	13.3523	17.1795	12.8299	16.8232	14.9612	17.2672	18.6277	17.1578	17.3679	17.5768	11.157
DO169	10.9655	13.2021	16.2434	15.7449	13.4564	17.2008	12.5401	16.7089	14.8063	17.2801	18.4337	16.9288	17.1462	17.229	10.5272
DO170	11.4137	13.2873	16.6696	16.2364	13.6674	17.3986	11.7545	17.0046	15.1788	17.3115	18.5085	17.1503	17.4756	17.6223	11.1644
DO171	11.9876	13.2736	15.83	15.2599	13.3174	16.8926	12.5418	16.3156	14.2422	17.1409	18.1992	16.6611	16.9851	17.0511	10.4047
DO172	11.2226	13.1101	16.0828	15.6249	13.8627	17.035	13.9184	16.3959	14.3135	17.4048	18.4554	17.1809	17.4896	17.2086	12.9778
DO173	12.5368	13.8944	16.3278	16.2143	13.5628	17.2913	12.9287	16.6913	14.8093	17.3023	18.5035	16.2521	17.2929	16.8466	11.0669
DO174	11.1638	13.3952	16.642	16.3203	13.5772	17.414	11.7129	16.9587	15.0968	17.3919	18.6296	17.2242	17.4395	17.6247	11.0772
DO175	11.8573	13.2188	16.2157	15.8488	13.6565	17.3534	12.7421	16.6745	14.7541	17.5992	18.6675	17.2213	17.4095	17.5507	10.8484
DO176	11.1787	13.1722	16.5422	16.2293	13.5267	17.5149	12.9928	16.95	15.0136	17.4492	18.5962	16.4466	17.318	16.8899	10.9544
DO177	11.7209	13.0882	16.1663	15.9117	13.1648	17.2594	12.6854	16.7011	14.8337	17.2491	18.4189	16.3801	17.2228	16.8812	10.803
DO178	10.5039	12.5866	15.9256	15.4422	12.9371	17.095	12.6355	16.4456	14.3879	17.1538	18.2784	16.6967	16.992	17.0308	9.82335
DO179	11.6531	13.1732	16.0522	15.8882	13.545	17.113	13.7106	16.6956	14.5894	17.1621	18.3274	16.1912	17.0089	16.6535	11.9672
DO180	11.425	12.8953	16.3278	15.8746	13.4112	17.1523	11.4017	16.7578	15.0386	17.1554	18.5881	17.0528	17.3939	17.4766	10.8849
DO181	11.7566	13.1019	15.8511	15.3954	13.337	16.9365	12.5341	16.1544	14.434	17.1062	18.4315	16.8685	17.2102	17.2955	10.9017
DO182	11.1641	12.8818	16.4394	16.1198	13.2022	17.4366	12.7418	16.8844	15.1706	17.3719	18.5967	17.0859	17.4704	17.7381	10.3682
DO183	11.2437	12.6809	15.6595	15.3964	13.2114	16.6309	13.1393	16.3204	14.3546	16.8138	17.9875	16.657	16.9133	16.9413	12.0014
DO184	10.7459	12.9422	16.4368	16.088	13.453	17.2899	12.0492	16.9625	15.176	17.2415	18.5213	16.9573	17.2896	17.46	11.2048
DO185	11.2514	13.0545	15.9935	15.5693	13.291	17.3324	12.7422	16.8448	14.9045	17.5152	18.6178	16.9667	17.2266	17.3435	9.99345
DO186	10.7893	13.0376	16.2896	15.8894	13.5208	17.0148	13.7419	16.4882	14.4714	17.0409	18.2323	16.0977	16.8764	16.5337	12.1646
DO187	11.1531	12.8321	16.4867	15.9861	13.3713	17.2945	11.4867	16.8657	14.9422	17.2691	18.7226	17.1729	17.4289	17.5705	10.9771
DO188	11.5812	12.9184	16.2778	15.8125	13.1234	17.015	11.3617	16.6585	14.8032	17.0752	18.1924	16.7983	17.1524	17.15	10.3852
DO189	11.0499	12.8486	16.2713	15.8471	13.4871	17.0866	13.5283	16.7224	14.684	17.1365	18.3945	17.0184	17.3327	17.3055	11.8377
DO190	10.7528	12.1684	16.1469	15.3923	13.1806	17.0892	12.2479	16.76	14.6312	17.1522	18.2393	16.2154	17.1704	16.7168	10.0949
DO191	11.7357	13.3189	16.1511	15.7987	13.6354	17.4127	12.9596	16.8512	14.8697	17.5001	18.7114	17.097	17.4202	17.5938	10.9111
DO192	11.2515	12.4324	15.427	15.0115	12.496	16.7187	12.0735	16.0673	14.0483	16.9234	18.0491	16.424	16.7519	16.8771	9.45937
DO193	12.1592	13.2731	16.2614	15.8658	13.1805	17.0685	11.1994	16.5609	14.7597	17.0598	18.5394	16.9609	17.2917	17.4685	10.6836
DO194	11.6089	13.165	16.2947	15.8411	13.5285	16.9843	12.1847	16.6011	14.6371	17.0763	18.2201	16.8693	17.0801	17.0296	11.6191
DO195	10.7415	12.6677	16.4938	15.7766	13.8165	17.2137	12.8907	16.8136	14.7719	17.2509	18.4349	16.2963	17.3636	17.0234	11.0937
DO196	11.1322	13.2866	16.6699	16.4313	13.4962	17.6005	13.0932	16.898	15.0047	17.5114	18.729	16.562	17.5268	17.1265	10.9433
DO197	12.7143	13.462	16.3106	15.5922	13.7296	17.2879	12.5018	16.8764	14.8069	17.2968	18.6127	16.4131	17.3951	17.0441	11.1862
DO199	10.9458	12.9809	15.9831	15.652	13.5402	16.7452	12.2159	16.4534	14.3807	16.8821	18.0432	16.6696	16.9277	16.8908	11.7475
DO200	11.548	12.9587	15.9462	15.5725	13.3565	16.8981	12.1513	16.4662	14.4559	17.0987	18.383	16.9348	17.3365	17.2483	12.067
DO201	11.4092	12.433	15.6235	15.043	12.9301	16.8003	12.316	16.0472	14.01	17.1083	18.3467	16.7716	17.16	17.2059	10.8177
DO202	11.9163	12.8506	15.7896	15.4104	13.5543	16.8638	13.4965	16.3589	14.3276	17.211	18.3435	16.8382	17.1957	17.0341	12.0074
DO203	11.1105	12.8545	16.2434	15.9019	13.164	17.1736	12.5655	16.619	14.7289	17.1438	18.3447	16.2138	17.1148	16.5868	10.3306
DO204	11.3911	13.3167	16.4646	16.0298	13.3126	17.1452	11.3467	16.5156	14.7009	17.0793	18.4408	17.0081	17.2793	17.3354	10.7495
DO205	11.5092	12.9467	15.9028	15.3583	13.1259	17.0814	12.461	16.4709	14.5683	17.2139	18.2989	16.7864	17.1201	17.1792	10.3037
DO206	11.5993	12.5193	16.1208	15.464	13.3572	16.9503	12.7036	16.5799	14.345	17.0937	18.2789	16.2327	17.255	16.7236	10.5812
DO207	11.136	12.2679	16.0127	15.2752	12.8512	16.904	12.0326	16.56	14.3174	16.9845	18.1238	16.1279	17.0855	16.5961	9.46143
DO208	12.1176	12.7735	15.9308	15.2724	13.5653	16.8012	13.1625	16.5997	14.4197	17.0776	18.2584	16.1999	17.2197	16.6722	11.6292
DO209	11.7258	12.9432	15.7291	15.1791	13.2092	16.7818	12.4288	16.1589	14.0726	17.045	18.2621	16.6186	16.9236	16.9912	10.4036
DO210	11.7736	12.9385	15.6774	15.4477	13.1425	16.9528	12.4437	16.1747	14.319	17.1877	18.42	16.8318	17.139	17.1871	10.6242
DO211	11.5674	13.0429	16.3902	15.8849	13.367	17.1241	11.2431	16.6776	14.8276	17.1589	18.4898	17.0046	17.3054	17.438	10.7713
DO212	12.114	12.9154	15.7645	15.3701	12.7138	16.6752	10.8319	16.1315	14.3901	16.8077	18.1863	16.6015	17.0097	17.1239	10.4741
DO213	11.2886	12.8201	16.3277	15.7602	13.5855	17.2851	12.7705	16.7824	14.868	17.4657	18.6384	17.0944	17.4026	17.5016	10.9166
DO214	12.2288	13.0022	15.5094	15.1354	13.1861	16.7727	12.4068	16.1166	14.137	17.0329	18.2135	16.6486	16.9592	17.1028	10.7153
DO215	11.6971	13.1091	15.8337	15.2858	13.5507	16.8447	13.4522	16.186	14.1263	17.1231	18.2707	16.9747	17.2773	17.0611	12.0403
DO216	11.9471	13.3359	15.9996	15.8228	13.3737	17.3466	12.6241	16.594	14.7916	17.446	18.6394	16.9262	17.31	17.4888	10.0545
DO217	10.9972	12.5878	16.0519	15.8608	13.2966	16.9796	12.6768	16.4858	14.6577	17.0274	18.219	16.7825	17.1116	17.356	10.9406
DO218	10.9078	12.8201	16.2247	15.8592	13.6885	17.0191	13.8972	16.7372	14.6899	17.119	18.3862	16.956	17.1991	17.0991	12.7908
DO219	11.9686	13.2116	16.4757	15.8837	13.3238	17.1733	11.2392	16.7663	14.9965	17.1801	18.4594	17.0322	17.3081	17.4207	10.9724
DO220	11.2418	12.4674	16.3199	15.4962	13.5238	17.1045	12.6177	16.7599	14.5222	17.2101	18.387	16.2696	17.2795	16.8769	10.5917
DO221	11.4995	13.4019	16.476	16.1005	13.5565	17.2304	12.7855	16.8797	15.03	17.2741	18.54	17.1067	17.3279	17.5004	10.9437
DO222	11.1221	12.9966	16.7365	16.3388	13.6835	17.5001	11.6523	17.1252	15.2809	17.4634	18.8236	17.2755	17.6418	17.762	11.2366
DO223	11.4844	13.5822	16.7201	16.2017	13.6066	17.3319	11.5948	16.8654	14.8926	17.2957	18.6613	17.2113	17.5714	17.6598	10.9925
DO224	10.6521	12.8911	16.1031	15.5576	13.2981	17.1924	12.8053	16.7204	14.714	17.3622	18.4245	16.9647	17.2261	17.2643	10.3456
DO225	12.5652	14.4509	17.2	16.734	14.2176	17.813	12.0091	17.135	15.5507	17.7388	19.1384	17.7331	18.0533	18.156	11.6345
DO226	11.8936	13.2964	17.0233	16.0465	14.1672	17.6235	13.2144	17.5595	15.4309	17.696	18.9145	17.0098	17.8423	17.4535	11.1593
DO227	12.0323	13.8653	16.673	16.2996	13.5911	17.4497	12.8709	16.8852	15.0629	17.3481	18.6618	17.1972	17.5204	17.6386	11.0765
DO228	11.8509	13.6985	16.6601	16.2207	13.7309	17.3775	11.4802	16.8015	15.0797	17.4296	18.7458	17.4335	17.6737	17.7508	11.205
DO229	11.7334	13.3743	16.0463	15.5577	13.4692	17.0023	12.5431	16.3424	14.5507	17.3554	18.345	16.9987	17.1826	17.196	10.7373
DO230	10.7684	12.8956	15.9798	15.7821	12.9367	16.8834	12.7875	16.5768	14.5997	17.0253	18.3228	16.7245	17.0078	17.2015	10.741
DO231	11.9184	13.7741	16.2525	16.1241	13.3223	17.4168	13.3775	16.7765	14.7727	17.324	18.5187	16.3904	17.3231	16.969	11.0294
DO232	11.9694	13.5123	16.2693	15.7769	13.2199	17.0229	11.2395	16.4848	14.6423	17.0631	18.3705	17.0435	17.4232	17.4478	10.7589
DO233	11.1255	13.29	16.4253	15.9562	13.5446	17.2578	12.8943	16.8143	14.9796	17.183	18.576	17.1544	17.4119	17.585	10.9696
DO234	11.4475	12.7885	16.2576	15.7823	13.3055	16.9853	11.2558	16.5647	14.7334	17.0348	18.282	16.9417	17.163	17.3248	10.8424
DO235	11.7871	13.3822	16.3596	16.0283	13.3198	17.2305	12.6978	16.7074	14.864	17.1817	18.5587	17.0621	17.3185	17.5642	10.8739
DO236	11.1245	13.2489	16.8293	16.4216	13.6611	17.4391	11.5274	16.9959	15.1738	17.3488	18.619	17.2428	17.5862	17.7147	11.1951
DO237	11.4557	13.2826	16.0748	15.5253	13.509	17.0892	12.9209	16.5406	14.585	17.319	18.425	16.9678	17.2091	17.2798	10.9764
DO238	11.5174	13.4902	16.5128	15.9781	13.7193	17.4545	12.9953	16.8726	14.8342	17.6062	18.7471	17.3115	17.5355	17.5143	10.9192
DO239	11.4876	13.4303	16.2222	15.5967	13.5489	17.2591	12.7365	16.7607	14.7594	17.4477	18.6206	17.142	17.3574	17.4219	10.7478
DO240	11.3436	13.1586	16.0901	15.5845	12.8379	16.8601	11.1528	16.3872	14.5402	16.8471	18.1061	16.7167	17.0269	17.0665	10.367
DO241	11.2954	13.0573	16.207	16.1214	13.5431	17.2992	13.862	16.6189	14.4861	17.2325	18.4712	16.296	17.2466	16.7084	11.5784
DO242	10.5273	12.8642	16.094	15.9546	13.1585	17.2166	13.3438	16.6973	14.695	17.1294	18.2784	16.1176	16.9978	16.6957	10.9177
DO243	11.7186	13.6643	16.2574	15.762	13.6518	17.3306	13.2186	16.6267	14.6863	17.4999	18.4735	17.1074	17.3794	17.331	10.7527
DO244	11.1999	12.7122	15.6373	15.1922	13.0624	16.7965	12.4878	16.117	14.1933	17.041	18.2906	16.7534	17.0671	17.2439	10.8827
DO245	11.575	13.3308	16.7045	16.2163	13.3923	17.4159	11.5574	16.8711	15.0496	17.3272	18.6308	17.1859	17.4364	17.6342	10.9234
DO246	11.2749	13.2839	16.5036	15.9525	13.7775	17.5141	13.0473	16.9241	14.9113	17.6569	18.6926	17.2899	17.4917	17.627	10.975
DO247	12.2465	13.7195	15.9296	15.6222	13.0319	16.9521	12.5469	16.4753	14.6154	16.8615	18.1853	16.6985	17.0559	17.2215	10.4857
DO249	11.5847	13.3812	16.1492	15.7042	13.6107	17.2174	12.8735	16.7733	14.9144	17.5068	18.7345	17.1362	17.4177	17.4634	10.7706
DO250	11.4834	13.3391	15.9526	15.3508	13.216	17.0425	12.6799	16.6293	14.6028	17.2641	18.196	16.7194	17.0455	16.9819	10.3659
DO251	12.0501	13.6338	16.3868	16.2588	13.3954	17.477	12.9256	16.7489	14.8927	17.3658	18.5223	16.391	17.3681	16.9431	10.9714
DO252	11.5834	13.3536	16.1478	15.7102	13.2213	16.9025	11.1932	16.406	14.6984	16.9082	18.1727	16.8418	17.2381	17.2108	10.4576
DO253	10.5645	12.6963	15.8953	15.3481	13.1038	17.0276	12.5851	16.5495	14.4434	17.2711	18.3387	16.81	17.0553	17.1007	9.65757
DO254	10.9982	13.0398	16.3081	15.8632	13.6923	17.2908	12.9201	16.8244	14.8687	17.502	18.6002	17.0536	17.3195	17.3655	10.7698
DO255	12.2272	13.7236	16.3584	15.996	13.2633	17.1611	11.245	16.646	14.8689	17.1141	18.4748	17.1013	17.3912	17.4805	11.1209
DO256	11.5913	12.3591	16.1942	15.3668	13.3645	16.9099	11.8004	16.5584	14.4651	17.0287	18.237	16.1163	17.2257	16.6481	10.4143
DO257	12.0226	13.9274	16.9419	16.6208	14.0866	17.9366	13.4938	17.5044	15.647	17.8096	19.0191	17.1066	17.7978	17.3986	11.2079
DO258	10.8659	12.9378	16.2091	15.783	13.9553	17.1241	14.2317	16.7564	14.601	17.4316	18.5351	17.1254	17.3338	17.1504	13.3438
DO259	12.1355	13.9337	16.4582	16.2555	13.2635	17.473	12.7563	16.881	15.0007	17.322	18.5608	16.39	17.3296	16.9311	10.465
DO260	10.9108	13.0441	16.5478	15.6386	14.0888	17.1135	13.7649	16.8379	14.5591	17.3625	18.5917	16.5025	17.7094	16.9126	12.7581
DO261	11.3302	13.5443	16.552	16.1913	13.5223	17.2664	11.5499	16.9096	15.0387	17.358	18.7027	17.3063	17.5904	17.6719	11.1154
DO262	10.7715	12.9849	16.5513	16.2872	13.4329	17.2421	11.3288	16.7858	14.9492	17.275	18.4334	16.9984	17.3228	17.5287	10.7179
DO263	11.7251	13.411	16.5268	16.1491	13.4061	17.2854	11.5275	16.8911	15.0104	17.2454	18.4812	17.0488	17.3786	17.5303	10.9149
DO264	10.9231	13.2677	16.4128	15.9317	13.8952	17.0434	12.6779	16.6774	14.668	17.0601	18.281	17.0441	17.2976	17.0945	13.2188
DO265	11.0186	13.0302	16.2534	15.8236	13.8246	17.2455	13.9237	16.6552	14.5285	17.4932	18.5687	17.0832	17.3338	17.2395	12.2571
DO266	11.3187	13.2737	16.7043	16.3003	13.609	17.3775	11.672	16.8054	15.1011	17.2402	18.5482	17.1261	17.4477	17.6573	11.1158
DO267	11.8569	13.7182	16.2656	16.058	13.5992	17.2688	14.0368	16.7485	14.6488	17.262	18.4806	16.3477	17.1856	16.7377	12.7159
DO268	10.6699	13.2363	16.1202	15.7348	13.5075	16.8958	12.2921	16.4038	14.3795	16.9779	18.2508	16.9001	17.1575	17.1002	12.4863
DO269	12.1167	13.003	16.6737	15.718	13.9883	17.5533	12.9173	17.1528	15.1445	17.6205	18.908	16.8713	17.8291	17.3786	11.3725
DO270	11.9956	13.9061	17.3123	16.9594	14.2674	17.9831	12.1438	17.4112	15.606	17.8627	19.0915	17.7754	18.0633	18.2636	11.5227
DO271	11.4056	13.0256	16.1211	15.6332	13.1677	16.9997	11.2764	16.5577	14.729	17.0196	18.4267	16.9831	17.3247	17.4835	10.8401
DO272	11.2887	13.3544	16.5997	16.0859	13.923	17.543	13.2045	16.8571	15.0556	17.7313	18.8355	17.3937	17.606	17.6575	11.464
DO273	12.302	14.0433	16.5433	16.5266	13.8542	17.7731	13.3123	17.2318	15.3201	17.6007	18.9462	16.6843	17.653	17.2585	11.3662
DO274	10.8837	12.554	15.978	15.65	12.9266	16.8687	12.6494	16.4853	14.5108	16.8718	17.9884	16.5262	16.87	16.8977	10.0171
DO275	10.9404	13.0177	16.3818	16.2648	13.3399	17.2883	11.1866	16.7686	14.933	17.231	18.6035	17.0358	17.3243	17.4643	9.73212
DO276	11.0945	13.2787	16.4325	15.9257	13.286	17.0325	11.316	16.4849	14.4812	16.9851	18.3129	16.8684	17.1919	17.3016	10.9619
DO277	11.0467	13.2185	16.5427	16.0357	13.3918	17.1357	11.3143	16.542	14.7019	17.0263	18.4749	16.9986	17.2151	17.4469	10.6319
DO278	11.3833	13.1047	16.1575	15.7863	13.7678	16.7483	12.5535	16.3665	14.3308	16.9147	18.1039	16.8077	17.0419	16.9181	13.306
DO279	11.0651	11.7783	15.2508	14.8908	12.2783	16.4533	11.5373	15.74	13.7693	16.7205	17.8196	16.6133	17.0432	16.9675	9.73755
DO280	10.8982	12.1772	16.2881	15.5202	13.4287	17.1396	12.5951	16.8632	14.8054	17.2038	18.3251	16.2653	17.2394	16.8992	10.5799
DO281	11.3998	12.8222	16.0972	15.5878	13.4272	16.7622	12.0654	16.3516	14.3322	16.8237	18.1547	16.7535	16.9892	16.9278	11.8119
DO282	11.4913	12.9008	16.1301	15.5937	13.7835	17.0623	12.8286	16.5862	14.5596	17.3413	18.4505	16.9641	17.2387	17.1785	10.7725
DO283	11.6519	13.6149	16.3012	16.0303	13.4068	17.4101	12.9489	16.9275	15.1023	17.3509	18.582	17.1095	17.4553	17.5808	10.5405
DO284	12.1743	13.754	16.3644	16.0074	13.9001	17.4421	13.0343	16.9527	15.0178	17.6157	18.6702	17.1072	17.3588	17.4276	11.0861
DO285	12.3488	13.7292	16.3125	15.899	13.8094	17.1748	12.6448	16.8541	14.8273	17.252	18.5473	17.1806	17.4474	17.3185	12.8277
DO286	10.7656	12.9669	16.0816	15.7844	13.4592	16.7482	12.4281	16.353	14.2486	16.9465	18.213	16.8404	17.0645	16.963	12.5413
DO287	11.6926	13.7357	16.5833	16.1104	13.5611	17.2958	11.6752	16.8242	14.9557	17.2761	18.6498	17.2617	17.4515	17.6655	11.2219
DO288	11.2116	13.0547	16.0348	15.5429	13.4834	17.2029	12.8117	16.6401	14.6354	17.3331	18.4158	16.8845	17.2198	17.3305	10.6003
DO289	12.155	12.8817	15.4655	15.007	13.1427	16.7613	12.312	16.1585	14.1208	17.0798	18.2172	16.7871	17.1062	17.1951	10.8059
DO290	12.3782	13.0815	15.4285	14.9201	12.8449	16.6637	12.0755	15.7115	13.9534	16.9312	18.3515	16.8523	17.4316	17.3656	11.2519
DO291	11.7989	13.0018	16.3646	15.9087	13.9966	17.0414	12.748	16.7467	14.7003	17.1223	18.417	17.0599	17.3956	17.1454	13.3719
DO292	11.2218	13.0367	16.4064	16.199	13.5073	17.5387	13.5412	16.9613	15.0005	17.396	18.4321	16.3675	17.2458	16.8966	10.8015
DO293	11.4086	12.4273	16.2386	15.4252	13.7234	17.0928	12.6025	16.7958	14.7186	17.2283	18.4481	16.2442	17.3553	16.901	11.1452
DO294	11.9129	13.4465	16.3874	15.909	13.5877	17.2363	11.6229	16.7444	14.8622	17.272	18.6484	17.1549	17.5671	17.7295	11.243
DO295	11.2781	12.888	15.9991	15.5374	13.8539	16.9942	14.0208	16.4961	14.4244	17.3018	18.4256	17.0424	17.223	17.0638	13.377
DO296	11.98	13.545	16.053	15.816	13.498	17.2871	12.8103	16.5968	14.6955	17.563	18.7686	17.1473	17.4814	17.5503	10.7766
DO297	11.5235	13.3161	16.2553	15.8928	13.1126	17.1757	11.4979	16.5755	14.6732	17.2068	18.4249	16.9924	17.2849	17.467	10.3581
DO298	11.3739	13.1423	16.3766	15.9292	13.3099	17.0902	11.2695	16.6281	14.8775	17.1133	18.373	17.0471	17.3944	17.4961	10.789
DO299	11.2846	12.8888	16.2237	15.7969	13.875	16.9531	12.6305	16.6392	14.6391	17.0884	18.2733	16.9361	17.196	17.0336	12.9961
DO300	12.2313	14.0946	16.8075	16.5403	13.9328	17.4993	12.953	17.1311	15.4269	17.4923	18.8372	17.3645	17.6889	17.8587	11.1416
DO301	12.0099	13.1029	16.2393	15.9926	13.0173	17.1098	10.8948	16.4813	14.934	17.0546	18.3955	16.7446	17.1877	17.397	10.3589
DO302	10.9862	13.1304	16.1117	15.8445	13.272	17.0548	12.6319	16.5338	14.596	17.0451	18.1886	16.104	16.9716	16.4817	10.6301
DO303	11.8318	13.3578	16.2511	16.2015	13.3851	17.5488	13.4145	16.9285	14.8634	17.4147	18.6717	16.4827	17.3181	16.915	10.8652
DO304	11.9172	13.4406	16.6063	16.3135	13.8225	17.5742	13.1994	17.1944	15.3903	17.5499	18.7931	17.3642	17.6131	17.8399	11.3353
DO305	11.5818	13.1865	16.0438	15.6814	13.3657	16.9051	12.2117	16.5186	14.5717	16.9889	18.235	16.8442	17.1154	17.0684	12.5067
DO306	11.8946	13.2177	15.8284	15.3478	13.2836	16.6325	12.2056	16.2378	14.211	16.7905	18.1713	16.8165	17.1204	16.9658	12.721
DO307	11.0944	12.9814	16.509	16.0331	13.4529	17.1693	11.5826	16.7478	14.7416	17.1336	18.5164	17.0096	17.3243	17.4383	10.691
DO308	11.1183	12.2916	16.4328	15.6729	13.6441	17.3048	12.4256	16.9023	14.8601	17.3554	18.6189	16.5263	17.5296	17.1752	11.0798
DO309	10.8261	12.888	16.3365	15.9681	13.3614	17.1921	11.938	16.7079	14.7468	17.1483	18.4426	16.9085	17.2459	17.3776	10.9548
DO310	11.2363	13.2926	16.5797	16.3105	13.4974	17.6521	12.9474	17.1097	15.2177	17.5551	18.7385	16.607	17.4627	17.0162	10.7157
DO311	11.5526	13.2205	16.1764	15.729	13.2273	17.0673	12.7774	16.6175	14.7597	17.0848	18.3261	16.8868	17.2421	17.3401	10.8084
DO312	11.7406	13.4638	16.8174	16.3267	13.7828	17.4967	11.7446	17.0671	15.2228	17.4054	18.6922	17.3813	17.612	17.7093	11.0996
DO313	11.4724	13.2501	16.4631	16.0741	13.4438	17.3853	12.9383	16.9231	15.1788	17.2376	18.5521	16.9543	17.3318	17.6307	10.8902
DO314	12.2036	13.99	17.036	16.8912	14.4239	18.1805	13.7243	17.3885	15.8626	17.9858	19.3917	17.9688	18.1748	18.436	12.242
DO315	11.2619	13.0829	16.5599	16.0278	13.6039	17.3202	11.5632	16.7131	14.9404	17.3019	18.6256	17.2514	17.4548	17.6279	10.8944
DO316	12.4769	13.8216	16.1418	15.8313	13.6567	17.2515	12.5615	16.4912	14.7589	17.3537	18.682	17.1012	17.4463	17.5156	10.6916
DO317	11.8425	13.6351	16.3111	15.8125	13.6242	17.3961	12.831	16.5995	14.7493	17.4855	18.6396	17.1302	17.491	17.5681	10.9135
DO318	11.672	13.4319	16.2097	15.9393	13.1838	17.0529	11.3515	16.3341	14.6824	16.928	18.3899	16.947	17.4324	17.4936	11.1049
DO319	12.4406	13.6069	16.3271	16.0148	13.846	17.3187	14.0314	16.8319	14.7282	17.3068	18.4748	16.4055	17.2149	16.8012	12.4081
DO320	11.2642	12.9055	16.2544	15.8986	13.4426	17.1251	12.2601	16.54	14.5074	17.0856	18.3359	16.8222	17.167	17.2193	11.3985
DO321	11.9556	14.0669	16.0475	15.7421	12.3602	16.4692	14.0207	16.3768	14.9481	16.9203	17.7551	15.7564	16.5694	16.0496	13.0931
DO322	12.1899	14.2722	15.6909	14.95	12.3347	16.0812	12.1389	16.3335	14.627	16.8311	17.808	16.3221	16.2908	15.9598	11.6676
DO323	11.9686	14.2367	15.8178	15.5145	13.0888	16.6113	13.9727	16.4541	14.9192	16.8887	17.8288	16.6172	16.6057	16.6882	14.313
DO324	11.8249	14.2949	16.0822	15.6857	13.2767	16.7257	12.5935	16.7067	15.1293	16.8867	17.9351	16.6519	16.7411	16.7308	14.178
DO325	12.4251	14.2972	16.1684	15.8891	11.8809	16.5301	13.8279	16.5497	15.2419	17.1464	18.0382	15.977	16.7302	16.2122	12.5111
DO326	11.9268	14.0657	15.6307	14.843	12.3734	16.007	12.2394	16.1942	14.5102	16.6616	17.6499	16.1828	16.1786	15.8166	12.1189
DO327	12.567	14.1365	15.5985	14.9889	12.5485	16.4972	13.8501	16.1649	14.703	16.8522	17.9575	16.5893	16.7077	16.5205	12.9275
DO328	12.2034	14.1669	15.8984	15.0097	12.4336	16.4395	13.9968	16.4053	14.9232	17.0458	17.905	16.5466	16.6497	16.2979	12.267
DO329	11.8808	13.994	16.0034	15.2664	12.5642	16.4528	13.8274	16.3999	14.8772	16.9686	17.9358	16.6098	16.594	16.3236	12.1128
DO330	11.7226	14.1051	16.1559	15.5949	12.9757	16.6389	12.7167	16.4894	14.8895	16.9916	18.0704	16.5709	16.7379	16.6739	13.2884
DO331	11.5133	13.6177	15.8659	15.2373	12.5104	16.315	12.5552	16.227	14.5914	16.797	17.929	16.4463	16.5308	16.31	12.6998
DO332	11.6198	13.6078	15.262	14.4568	11.7306	16.0144	13.4854	15.9324	14.4216	16.6425	17.5261	16.0236	16.17	15.9196	11.6402
DO333	11.9475	14.0431	15.6763	15.1149	12.7336	16.3545	13.8333	16.2758	14.7323	16.7844	17.8357	16.4916	16.548	16.404	13.3089
DO335	11.4476	13.8517	16.0614	15.0937	12.9697	16.264	13.4219	16.3901	14.7167	16.8767	17.7007	15.5571	16.698	16.0933	12.6393
DO336	12.7704	14.622	15.9468	15.3694	12.7712	16.5023	12.4933	16.4311	14.8199	16.9645	17.9832	16.5557	16.7378	16.6089	12.961
DO337	11.4795	13.6857	16.0187	15.3234	12.8528	16.4252	12.5487	16.3238	14.7886	16.6572	17.788	16.4628	16.5516	16.4182	13.6626
DO338	12.7038	14.8151	16.0444	15.5475	13.1601	16.7143	12.6402	16.5841	14.9827	16.924	17.9608	16.7662	16.8395	16.7444	14.103
DO339	12.0841	14.0919	15.8641	15.4148	13.0288	16.5809	13.845	16.3839	14.8829	16.7784	17.7601	16.5985	16.6627	16.616	13.9397
DO340	12.6429	14.8646	16.2296	15.7226	13.284	16.8011	12.7293	16.6805	15.1002	17.0024	18.0832	16.8408	16.9314	16.8444	14.2706
DO342	12.2575	14.6559	16.5897	16.1053	13.7039	17.0892	13.0369	16.9664	15.3782	17.2594	18.1951	16.987	17.1378	17.0413	14.4145
DO343	12.0116	14.0967	15.9868	15.1951	12.6738	16.6955	14.1169	16.4758	15.048	17.1425	18.0883	16.7432	16.8594	16.6386	13.0688
DO344	11.7808	13.6411	15.9796	14.9615	13.0615	16.4192	13.5738	16.3961	14.7805	16.8286	17.8575	15.5912	16.7058	16.1241	13.2583
DO345	11.9239	13.9504	15.49	14.7171	12.1536	16.2588	13.7986	16.229	14.7225	16.9018	17.8272	16.3528	16.4869	16.168	12.1272
DO346	12.4132	14.4985	15.7767	15.1918	12.5557	16.5282	13.8356	16.2278	14.8649	17.1012	18.0185	16.6863	16.769	16.5312	12.9097
DO347	11.8329	14.319	16.2431	16.0156	12.7998	16.7793	14.2984	16.7458	15.2104	17.136	18.0913	15.9097	16.7905	16.3619	13.6653
DO348	11.8315	13.8281	15.7323	15.1058	12.302	16.1847	12.3057	16.2886	14.514	16.757	18.0809	16.5212	16.4369	16.0877	11.9744
DO349	11.8228	13.9524	15.4079	14.8785	12.2285	15.9775	13.4073	16.2031	14.6059	16.5608	17.5104	15.92	15.9959	15.7092	11.6211
DO350	11.6332	14.259	16.2393	15.7699	13.3594	16.8885	12.868	16.8968	15.2275	17.0809	18.0952	16.8254	16.9126	16.8176	14.3479
DO352	11.7008	13.879	15.7336	15.0205	12.567	16.5205	14.0484	16.3513	14.919	17.0129	17.9593	16.5753	16.6923	16.4877	12.9937
DO353	11.8209	13.854	15.7627	15.1593	12.583	16.4067	13.821	16.6234	14.9865	17.0732	18.0839	16.5282	16.5503	16.1897	11.9462
DO354	11.6725	13.5258	14.9666	14.6532	10.07	15.4392	12.8004	15.7682	14.274	16.2939	17.3305	15.0881	15.7123	15.2217	10.7471
DO355	12.1775	14.6854	16.1225	15.6242	13.1273	16.7337	12.7193	16.655	15.0491	17.0163	18.0316	16.7482	16.7812	16.745	14.1234
DO356	11.9083	14.2954	16.0001	15.7648	12.7727	16.5948	13.9562	16.5347	15.0466	16.8484	17.7899	15.7689	16.546	16.2251	13.8916
DO357	12.0822	14.0388	15.673	14.959	12.4704	16.2027	12.3417	16.0611	14.4975	16.6606	17.8954	16.4859	16.5799	16.3834	13.0806
DO358	11.3583	13.6373	15.7221	14.9598	12.5284	16.5032	14.0384	16.3206	14.7246	17.025	18.0605	16.5866	16.6748	16.4177	13.0391
DO359	11.3129	13.5764	15.298	14.6546	11.9413	15.7571	11.8952	15.8415	14.1019	16.4012	17.5105	15.8995	15.8575	15.5813	11.5292
DO360	11.5733	13.854	15.6815	14.9225	12.2806	16.3814	13.8859	16.2032	14.7099	16.9338	17.8379	16.4657	16.6097	16.3601	12.4126
DO361	11.5101	13.3398	15.214	14.6266	12.125	15.9233	13.4334	15.8338	14.2792	16.3188	17.5147	16.0876	16.1062	15.8625	12.2861
DO362	11.2363	13.3216	15.1471	14.2278	11.4554	15.6993	13.2348	15.6961	14.1147	16.5689	17.4936	15.9215	16.0526	15.4927	10.4606
DO363	12.2184	14.3414	16.3279	15.9011	13.2843	16.8827	14.2285	16.8404	15.3322	17.0744	17.9865	15.8597	16.7354	16.3919	14.3164
DO364	11.9172	13.7094	15.6359	14.9565	12.4703	16.4488	13.9532	16.3314	14.8668	16.9675	17.9074	16.452	16.5385	16.3546	12.9339
DO365	12.0392	14.0099	16.1546	15.6555	13.1321	16.7022	12.546	16.4696	14.952	16.8255	17.8746	16.6674	16.7914	16.6858	13.9401
DO366	11.9451	14.4285	16.0962	15.4681	13.2109	16.6939	14.0297	16.611	15.0302	16.8743	17.9008	16.6864	16.7158	16.6366	14.1301
DO367	11.8296	13.7744	15.3793	14.592	11.7948	16.1637	13.5921	16.2825	14.7021	16.9987	18.1866	16.4403	16.4931	16.1261	11.0177
DO368	11.9744	14.1237	16.0105	15.2872	13.016	16.4673	12.6912	16.4936	14.8471	16.8985	17.934	16.6463	16.7837	16.4992	13.5968
DO369	12.2348	14.466	16.3452	15.7886	13.2654	16.8135	12.6945	16.4437	14.9715	16.937	17.9781	16.7664	16.9254	16.7604	14.0034
DO370	11.7198	13.526	15.4396	14.6988	12.1303	15.9324	12.1512	16.0453	14.3179	16.5272	17.5734	16.2114	16.2126	15.8264	11.8093
DO371	12.3196	14.2812	15.8838	15.391	12.7424	16.4835	12.5016	16.2345	14.7613	16.865	17.976	16.5783	16.6716	16.5328	13.3477
DO373	12.8392	14.5938	16.0317	15.4492	12.919	16.634	12.5642	16.212	14.6463	16.8563	18.0081	16.8556	17.0535	16.8862	13.9791
DO374	12.6807	14.1259	16.098	15.2761	13.1468	16.5492	13.8615	16.0663	14.4418	16.8794	17.8832	16.8993	16.9031	16.7876	14.0513
DO375	12.5273	14.2622	16.0134	15.5461	12.303	16.5096	14.0583	16.4482	15.0749	17.1053	18.0159	15.919	16.7942	16.3151	13.4098
DO376	12.7363	14.2373	16.393	15.5248	13.218	16.8155	12.7474	16.4013	14.7695	17.2515	18.2838	17.0468	17.22	17.0559	14.0364
DO377	12.6098	14.8361	16.6163	16.3915	13.7348	17.251	14.6457	17.0744	15.433	17.4762	18.468	16.1891	17.0811	16.7266	14.6885
DO378	12.6017	14.6486	16.4002	15.6982	13.1348	16.7531	12.934	16.5763	14.8926	17.2475	18.2956	16.9481	17.0728	16.7288	13.3132
DO379	12.3688	14.2948	16.0863	15.2499	12.8451	16.5846	12.6533	16.4069	14.8724	16.9552	18.0238	16.6538	16.8223	16.6033	13.1137
DO380	11.9942	14.068	16.1413	15.4408	12.9146	16.6321	12.6933	16.6776	15.1048	17.0822	17.9904	16.5764	16.691	16.499	12.8547
DO381	11.9416	14.1911	15.9795	15.3268	12.8498	16.3837	12.5736	16.2326	14.5928	16.7053	17.7607	16.4264	16.535	16.2788	13.3699
DO382	11.3735	13.0925	14.9129	14.2965	11.8078	15.5872	13.0225	15.7069	14.1428	16.1898	17.2678	15.7691	15.7873	15.4901	11.7388
DO383	12.3508	13.5285	15.5304	14.5351	12.183	15.9908	12.1055	15.5434	13.9053	16.5546	17.6338	16.4106	16.5388	16.2343	12.8116
DO384	12.2152	13.4408	15.7014	15.4527	11.7908	16.3084	13.7947	16.0511	14.6915	16.8302	17.7517	15.8097	16.8593	16.3061	13.2322
DO385	12.309	13.9605	15.328	14.7836	12.5159	16.3414	13.6273	16.0527	14.5702	16.6886	17.8195	16.4533	16.5244	16.3813	13.2999
DO386	12.0126	13.8277	15.7363	15.2812	12.7138	16.4622	13.793	16.2141	14.6575	16.7574	17.8263	16.5713	16.7108	16.6248	13.7875
DO387	12.0486	14.1402	15.7292	15.4242	12.9304	16.4705	12.3942	16.2667	14.6184	16.661	17.8724	16.522	16.5421	16.608	14.1579
DO388	11.7261	14.3026	16.0481	15.4571	13.0585	16.5438	12.647	16.3502	14.6727	16.7534	17.8833	16.6176	16.6804	16.4767	14.0835
DO389	12.4063	14.0607	15.7488	15.156	12.6469	16.41	12.5096	16.0191	14.4348	16.7251	17.9076	16.6448	16.7836	16.6574	13.6591
DO390	12.068	14.3085	16.44	15.9006	13.3751	16.839	12.5947	16.4357	15.1621	17.1348	18.1805	17.062	17.2045	16.9817	13.9525
DO391	12.5338	14.3456	16.1609	15.4486	13.0909	16.6607	12.7824	16.5743	15.0377	16.9145	18.0193	16.6704	16.7904	16.6288	13.994
DO392	11.8987	13.9071	16.0859	15.4561	13.5114	16.6852	13.5899	16.7373	15.0951	17.0709	18.0108	15.7545	16.8518	16.3904	13.7618
DO393	11.7495	13.6044	15.305	14.6662	12.0226	16.21	13.74	15.9034	14.356	16.781	17.8128	16.2941	16.4568	16.1861	12.272
DO394	11.3793	13.4868	15.6361	15.1045	12.3711	16.1293	12.3295	16.0359	14.4634	16.6434	17.7946	16.333	16.44	16.2811	13.0762
DO395	12.1215	14.1431	15.575	15.1659	12.7972	16.4469	13.8486	16.2747	14.7202	16.7957	17.9077	16.5457	16.6092	16.5687	13.9554
DO396	12.1644	14.1557	15.669	15.0392	12.4994	16.49	13.8973	16.3575	14.8362	17.0012	17.8532	16.4854	16.5986	16.3578	12.3698
DO397	12.1993	13.9832	15.3209	14.6632	12.1385	16.2622	13.7334	16.0366	14.5618	16.827	18.0096	16.4129	16.5625	16.284	12.5644
DO398	11.6763	12.7171	14.6302	13.7075	11.3125	15.2119	10.8548	14.9066	13.5065	16.0561	17.1625	16.028	16.0516	15.6706	11.52
DO399	11.7669	13.5802	15.207	14.6204	12.0381	15.903	13.3282	15.7905	14.1506	16.5269	17.7357	16.2691	16.3122	16.0935	12.1291
DO400	11.883	13.961	15.6101	14.9606	12.6514	16.2565	13.66	16.2359	14.6493	16.657	17.6839	16.3442	16.5135	16.3092	13.0757
DO401	11.8192	13.8479	15.4754	15.04	12.3052	16.0735	12.1215	16.0064	14.4505	16.5702	17.6108	16.142	16.3333	16.2206	12.6729
DO402	12.3189	14.1582	15.619	14.9766	12.704	16.4953	13.9099	16.2883	14.7529	16.9386	17.8524	16.5177	16.698	16.4015	13.1019
DO403	12.3856	14.134	15.6451	15.3108	12.1755	16.2007	13.6766	16.1996	14.8322	16.6304	17.6813	15.6327	16.3805	15.9925	13.0183
DO404	12.7976	14.2121	15.5101	15.3084	12.3283	16.2337	13.3593	15.7966	14.6009	16.7094	17.5648	15.7212	16.5453	16.073	13.3684
DO405	12.5758	14.2368	15.6776	15.4304	13.0925	16.6295	13.8039	16.2875	14.7042	16.6226	17.6364	16.3899	16.4568	16.4195	13.9316
DO406	11.7819	14.294	16.1578	15.4319	12.911	16.5615	12.7728	16.4223	14.77	16.9592	18.0849	16.6918	16.8322	16.5968	13.2258
DO407	12.1081	14.4414	16.0543	15.4949	13.0489	16.5366	12.5991	16.478	14.9194	16.7718	17.8134	16.5235	16.6383	16.4761	13.793
DO408	11.5851	13.8754	15.7715	15.14	12.9142	16.6689	14.0162	16.3697	14.8745	17.0037	17.9902	16.6618	16.7857	16.6072	13.6123
DO409	12.0688	13.6711	15.0814	14.2631	11.8754	15.9952	13.462	15.6971	14.2394	16.6286	17.538	16.1963	16.3181	15.9707	11.8518
DO410	12.0563	14.1772	15.8187	15.1451	12.7802	16.3438	12.3975	16.1098	14.5015	16.6406	17.7001	16.516	16.6415	16.4132	13.708
DO411	11.4818	13.3309	15.4425	14.5407	11.931	16.1344	13.6614	15.9754	14.4731	16.8584	17.8008	16.2978	16.4265	16.0581	11.6253
DO412	11.6772	13.7471	15.6701	14.9433	12.4884	16.449	13.8542	16.13	14.7021	16.9617	17.8984	16.4999	16.6387	16.4586	12.881
DO413	11.8528	13.9458	15.4522	14.8841	12.3227	16.1357	13.6651	15.8441	14.2313	16.5792	17.7032	16.2571	16.3836	16.2445	13.0641
DO414	11.9447	13.7715	15.7763	15.1613	12.6195	16.6226	14.0446	16.2184	14.7239	17.1035	18.137	16.6939	16.8908	16.7322	13.2643
DO415	11.8598	13.901	15.5203	14.6949	12.0642	16.2429	13.627	16.1345	14.7271	16.99	17.8083	16.4636	16.57	16.1463	11.3431
DO416	12.6616	14.7475	16.3023	16.1204	13.1626	17.0292	14.3347	16.7933	15.2889	17.2643	18.1215	15.9978	17.0026	16.5649	14.1188
DO417	12.7429	14.4649	15.8844	15.3914	12.9871	16.648	12.5435	16.317	14.7841	16.8668	17.963	16.6875	16.8834	16.7954	13.987
DO420	11.9906	13.99	15.7887	15.1659	12.6988	16.2998	12.4452	16.3243	14.7669	16.6905	17.7767	16.3625	16.548	16.2763	13.2688

## Sheet: 2d. liver
DO mouse	mt-Rnr1	mt-Rnr2	mt-Nd1	mt-Nd2	mt-Nd3	mt-Nd4	mt-Nd4l	mt-Nd5	mt-Nd6	mt-Cytb	mt-Co1	mt-Co2	mt-Co3	mt-Atp6	mt-Atp8
DO021	16.9821	17.4492	17.9752	18.1084	13.7909	18.9497	15.4662	18.6686	16.6979	19.3418	20.7409	16.3253	17.6076	17.205	16.6659
DO022	15.9943	16.4886	17.6083	17.3478	13.6979	18.5121	10.047	18.5002	16.4726	19.1299	20.1831	9.47588	17.632	16.9287	16.1518
DO023	16.2856	16.9979	17.8404	17.4969	13.3936	18.3323	14.5474	18.1441	15.9941	18.6767	20.3948	15.4727	16.9782	15.9948	16.2825
DO024	16.929	17.3212	17.2906	17.2651	13.7073	18.378	14.3787	18.0968	15.8972	18.7086	20.1635	15.2554	16.9041	16.0014	15.887
DO025	17.422	17.6741	18.1596	18.7789	13.2341	19.351	15.7214	18.9457	17.0223	19.6085	20.8955	10.3163	18.2098	17.8566	16.7533
DO026	16.7061	17.2855	18.0773	18.0343	13.6266	18.7278	15.1018	18.3116	16.1594	19.104	20.5158	16.1935	16.8815	16.47	16.7494
DO027	16.9438	17.5043	18.0791	17.9149	13.9712	19.0552	15.5404	18.7638	16.862	19.7007	20.8131	16.5535	17.8123	17.1979	16.4435
DO028	16.809	17.6873	17.9054	17.931	13.7499	18.6962	15.2897	18.5194	16.6159	19.113	20.3556	16.644	17.3692	16.7341	16.0805
DO030	16.3482	16.8016	17.5131	17.4381	13.419	18.4154	14.8525	18.128	15.9096	18.7283	20.292	15.1746	16.9077	15.9606	15.9753
DO031	16.8537	17.3129	17.8128	17.9195	13.6212	18.7062	15.5184	18.3914	16.2895	19.0555	20.5654	16.252	16.7947	16.4298	16.5994
DO032	16.5367	17.3829	18.1724	18.0105	13.9224	19.109	15.5574	18.7397	16.7447	19.5944	20.9788	16.5019	17.8717	17.286	16.6272
DO033	16.2372	17.077	18.1683	18.3066	13.9411	18.8382	15.3084	18.261	16.1855	19.244	20.6927	16.3985	17.0966	16.6996	16.9089
DO034	16.3751	17.5002	18.088	18.0002	13.5797	19.0057	15.3319	18.5816	16.5608	19.4324	20.6826	16.9236	17.7022	16.92	16.7414
DO035	16.6367	17.3793	17.4156	18.0018	13.9191	18.7016	10.375	18.6194	16.4813	19.3246	20.4201	16.7725	17.2077	16.8838	16.2738
DO036	16.7955	17.3987	18.072	17.7753	13.6445	18.8181	10.5296	18.8272	16.7781	19.3963	20.6717	10.5379	17.9923	17.3823	16.9212
DO037	16.9326	17.0929	18.0663	17.6708	13.8285	18.9167	15.433	18.7055	16.8588	19.5424	21.0554	16.4176	17.9018	17.2406	16.576
DO038	15.9757	16.3826	17.5369	17.3723	13.3563	18.6034	15.2153	18.1356	16.1767	19.149	20.5357	16.1323	17.4912	16.9298	16.0784
DO039	15.9524	16.7337	17.4988	17.4912	13.0303	18.2382	9.97584	17.9007	15.7955	18.5949	20.1792	16.4441	16.9207	16.3718	15.6875
DO040	16.9055	17.6925	18.0812	17.8658	14.1146	18.9249	15.2098	18.7613	16.6461	19.4404	20.8159	16.4333	17.803	16.6676	16.998
DO041	17.51	18.157	18.3333	18.2969	13.9893	19.1605	15.2211	18.9338	16.9673	19.4047	20.8414	17.0099	17.8281	17.2893	17.4025
DO042	16.7419	17.4955	17.8789	17.7958	13.7742	18.9065	15.2404	18.5456	16.5909	19.5218	20.7719	16.8829	17.66	16.9902	16.5343
DO043	16.521	17.1713	18.2911	17.6423	13.474	18.6963	10.2118	18.6792	16.5002	19.1069	20.8603	17.1264	17.7136	16.9612	16.7664
DO044	16.489	16.8055	18.1396	18.0697	13.3222	18.9476	15.4275	18.8269	16.9401	19.4573	20.6574	10.5384	17.9171	17.3666	16.3931
DO046	17.0508	17.2382	17.5909	17.5486	13.2815	18.4499	15.0376	18.1651	15.913	19.1358	20.5433	16.1688	17.306	16.1832	16.1395
DO047	16.2937	17.1028	18.0019	18.036	13.6086	18.9111	15.4089	18.4168	16.3562	19.0516	20.6164	16.6271	17.4191	16.8413	16.793
DO048	16.6565	17.5663	18.4084	17.9945	13.5326	18.8053	14.991	18.4598	16.5186	18.918	20.7359	16.5408	17.0759	16.5429	17.1993
DO049	17.2275	17.6645	18.439	18.3786	13.9103	19.5199	15.8628	19.0113	17.0941	19.7984	20.9448	16.6833	18.0744	17.5351	17.0565
DO050	17.1233	17.5604	18.1156	17.7594	13.7114	19.08	15.4307	18.8175	16.8872	19.4271	20.7931	16.8456	17.629	17.0352	16.7998
DO051	17.0357	17.3489	18.0504	17.8215	13.103	18.6225	15.1255	18.5637	16.4296	19.1982	20.7211	15.6854	16.9811	16.4972	16.4933
DO052	17.1991	17.7384	18.3257	18.2589	13.9861	19.1972	15.5667	18.6714	16.6109	19.7709	20.8706	16.073	18.0433	17.047	17.0624
DO053	16.6615	17.3561	18.1405	18.3835	13.6304	19.038	11.3524	18.8154	16.777	19.576	20.9447	16.5487	17.9465	17.4032	17.1854
DO054	15.9991	16.7468	17.2826	17.8215	13.6105	18.2686	9.88971	17.9493	15.6815	18.422	20.1209	15.7181	16.1627	15.8401	15.6582
DO055	17.3835	18.0644	18.2761	18.4955	13.9315	19.1856	15.3748	19.0307	17.0398	19.7368	20.82	15.9545	17.9621	16.9769	17.1739
DO056	17.9232	18.2762	18.2177	18.5253	12.9243	18.9312	15.2136	18.5216	16.562	19.2788	20.7173	9.68409	17.9869	17.6069	16.6521
DO057	16.8789	17.688	17.873	17.6907	14.1142	18.8227	15.3092	18.6239	16.6731	19.3399	20.5641	16.7211	17.5616	16.7969	16.3339
DO058	17.4127	18.0901	18.4963	18.2003	13.6907	19.0665	15.4226	18.7209	16.6211	19.5956	20.9108	16.1107	17.4	16.9562	16.9939
DO059	17.0877	17.7278	18.1294	18.2973	14.0659	18.9149	10.489	18.5534	16.6995	19.4319	20.7677	16.5239	17.8193	17.2572	17.0265
DO060	18.036	18.5303	18.003	17.9752	13.5428	18.5027	14.8467	18.3885	16.3728	18.9265	20.3931	15.633	17.396	16.4082	16.4902
DO061	17.0661	17.2998	17.722	18.2898	12.9827	18.9915	15.3134	18.7022	16.7478	19.2308	20.5416	10.0882	17.8594	17.5713	16.7438
DO062	16.651	17.382	18.3158	18.0953	13.4033	18.9106	15.3445	18.4551	16.432	19.2043	20.7836	15.8597	17.818	16.8037	16.9457
DO063	16.1933	17.1725	17.957	17.8538	13.9813	18.9917	15.0025	18.5185	16.5689	19.4395	20.803	16.7296	17.6829	16.9697	16.8219
DO064	16.7563	17.4346	17.7697	17.6896	12.9846	18.3114	14.8733	18.2351	16.26	18.6172	20.5088	9.94478	17.4775	17.0578	15.846
DO065	15.8639	16.4309	17.701	17.689	13.9621	18.818	15.1972	18.4729	16.5897	19.0265	20.4061	16.2569	17.3361	16.7765	16.4321
DO066	17.2557	17.9868	18.3792	18.1095	13.7802	18.9009	10.0047	18.588	16.5424	19.2728	20.899	17.1614	17.7335	17.1724	17.2423
DO067	16.6765	17.1718	18.1514	18.3314	13.3002	19.0215	15.1023	18.7397	16.809	19.5416	20.7635	10.3272	18.1731	17.8943	16.9835
DO068	16.0676	17.1537	17.7304	18.0676	13.8396	19.1669	15.441	18.6932	16.6467	19.2063	20.5882	16.8016	17.4932	16.9452	17.1331
DO069	16.8149	17.4622	17.6817	17.2496	13.6542	18.4545	15.1108	18.3689	16.4387	19.0968	20.5687	16.6404	17.2796	16.5872	15.6243
DO070	16.0398	17.0599	17.4416	17.1749	13.4747	18.2636	9.63368	18.0701	15.9127	18.6885	20.2776	15.9301	16.3015	15.9495	16.1686
DO071	16.3104	17.3187	17.5374	17.9062	13.6329	18.2592	14.4474	18.1989	16.0716	18.4197	20.0967	15.2204	16.2487	15.8075	15.8715
DO072	16.6772	17.435	17.6295	17.5726	13.2577	18.398	14.9661	18.3442	16.1963	19.0677	20.4188	15.5876	16.7917	16.2666	16.293
DO073	17.2873	17.9409	18.1351	18.1391	13.8127	18.9505	15.4823	18.636	16.5219	19.5354	20.9123	15.9142	17.6686	16.7838	16.6125
DO074	16.9651	18.0627	18.0774	18.3925	13.8731	19.458	15.6131	18.9787	17.0473	19.8497	21.1551	16.7204	18.1144	17.5155	17.5687
DO075	15.9293	16.635	17.4615	17.5459	13.4509	18.4651	14.587	18.3538	16.177	18.8412	20.4879	15.5664	17.0776	16.2203	16.621
DO076	16.5834	17.749	18.4251	18.2649	13.8161	19.1061	15.3966	18.6622	16.5943	19.2788	20.883	16.7176	17.9371	16.799	17.1201
DO078	16.7566	17.5287	18.3554	18.3354	13.8327	19.2223	15.6975	18.8709	16.7749	19.6966	21.0853	16.7701	18.1145	17.4805	16.9519
DO079	16.5459	17.3484	17.9013	18.0787	13.3942	18.8861	15.2831	18.5771	16.5782	19.3057	20.6978	11.1475	17.9178	17.6348	16.8297
DO080	17.397	17.9493	17.8806	18.0434	13.7859	19.1104	15.5896	18.7656	16.8148	19.6051	20.8549	16.4059	17.768	17.3106	16.609
DO081	16.1911	17.1524	18.2216	18.3815	13.8454	19.0559	15.3648	18.9493	16.8441	19.4429	20.9045	16.5936	17.1518	16.6748	17.4438
DO082	16.2161	17.0686	18.0728	18.0101	14.2222	18.826	15.1152	18.6598	16.3099	19.1026	20.7015	16.1513	17.5012	16.8445	16.5864
DO083	17.0199	17.6873	18.5761	18.4219	13.4869	19.2462	15.3813	19.0527	17.0319	19.6955	21.0628	16.1634	17.5253	17.0896	17.3549
DO084	17.4822	18.1525	18.3999	18.4351	14.0666	19.2459	15.7236	19.1086	16.9568	19.706	21.0545	16.1581	18.0244	16.9989	17.1358
DO085	16.4602	16.9512	17.6474	17.7278	13.4453	18.7148	10.8711	18.4708	16.5103	19.1978	20.6172	16.8863	16.8018	16.3887	16.6204
DO086	16.1763	16.7803	17.4024	17.0496	13.8417	18.4803	15.04	18.1925	16.2297	18.8085	20.2772	15.9284	17.0724	16.4791	15.6754
DO087	16.776	17.595	17.866	17.9531	13.6257	18.7659	15.3586	18.5186	16.4765	19.0608	20.8327	16.8821	17.5278	16.962	16.3085
DO088	16.4866	17.2985	18.4748	18.6535	14.0406	19.1515	15.2151	18.9881	16.9664	19.3674	20.724	16.6931	17.8187	16.8997	17.6393
DO089	16.519	17.4626	18.6282	18.4491	13.6401	19.1524	10.8331	18.7916	16.6388	19.3614	20.9716	17.3615	17.9065	17.4337	17.5644
DO090	16.9813	17.7627	18.0492	18.4407	13.4045	19.0059	15.3983	18.7475	16.7646	19.4125	20.6184	10.1945	17.9231	17.4931	16.5053
DO091	16.5319	17.0856	18.1207	18.3748	13.2306	19.2226	15.5437	18.8137	16.7456	19.5713	20.9151	8.65837	18.1593	17.7559	16.8582
DO092	16.7413	17.7874	18.7578	18.7547	13.8933	19.4681	15.7507	19.0238	16.9102	19.7416	21.0842	16.3854	17.6724	17.1559	17.6327
DO093	15.5124	16.2917	17.4588	17.2845	13.0264	18.0027	14.1874	17.9508	15.5853	18.2565	20.2996	15.0196	16.7161	15.7137	15.7426
DO094	17.3243	17.7415	17.8812	18.329	13.1514	18.8638	15.3121	18.5139	16.5468	19.2563	20.5148	10.3695	17.885	17.536	16.4002
DO095	17.4439	18.1897	18.3915	18.7594	14.1133	19.3081	15.6404	18.8046	16.6546	19.571	20.8842	16.0847	17.9515	17.113	17.3299
DO096	16.879	17.4623	18.1042	18.3331	13.2044	19.0597	15.5194	18.8545	16.7861	19.2584	20.6602	11.6547	17.9629	17.6184	16.8314
DO097	16.5709	17.3468	18.3491	18.3797	14.0314	18.908	10.8985	18.8302	16.787	19.328	20.6586	9.36814	17.9437	17.472	16.6384
DO098	16.6121	17.4888	17.1597	17.2857	12.9571	17.968	14.5551	17.7524	15.7286	18.6255	19.9287	15.061	16.8583	15.8948	15.7583
DO099	16.801	17.5351	17.9339	18.0379	13.3481	18.8845	10.4719	18.6911	16.5561	19.2046	20.7065	16.4887	17.5756	17.2151	16.5742
DO100	16.5268	16.9189	17.9459	17.6902	13.111	18.6363	14.7599	18.6694	16.5205	19.019	20.4762	8.66584	17.6081	17.2071	16.3568
DO101	16.7647	17.147	17.6714	17.922	13.8027	18.8015	15.1975	18.5111	16.5006	19.2958	20.7113	16.5621	17.4679	16.8638	16.1092
DO102	15.7041	16.6817	17.9495	17.887	13.2795	18.7898	15.3254	18.566	16.3339	19.2306	20.766	16.3992	16.9678	16.275	16.6768
DO103	16.5447	17.3925	17.5967	17.8219	13.941	18.4738	14.9135	18.3874	16.2439	18.8115	20.2523	15.3548	16.96	16.0066	16.0551
DO104	17.0829	17.6654	18.3867	18.8014	13.5808	19.546	15.5426	19.2269	17.3648	19.7226	20.9641	11.2278	18.4257	18.2633	17.7704
DO105	17.1061	17.4794	17.8055	17.6139	13.8641	18.5561	15.1508	18.3864	16.4378	19.0041	20.5952	16.37	16.9029	16.4249	16.6956
DO106	16.644	17.3352	18.0884	17.9649	14.4236	19.0215	15.5845	18.7979	16.6733	19.5477	20.8598	16.5766	17.82	17.2121	16.4429
DO107	17.3421	18.1807	18.1965	18.2594	13.9504	19.3693	15.5862	18.9466	17.0459	19.611	21.0295	16.6685	17.9657	17.4932	17.408
DO108	17.0895	17.6088	18.2856	18.457	13.7552	19.1777	15.5549	18.9104	16.8327	19.5982	20.954	16.0016	17.3451	17.0707	17.2165
DO109	17.4715	18.2151	18.0898	18.2463	13.444	18.9711	15.2648	18.6474	16.6124	19.1935	20.7655	16.3834	17.6265	16.7435	16.9853
DO111	16.4937	17.4762	18.3664	18.0883	13.9907	19.2493	15.7963	18.9342	16.9109	19.708	21.0743	17.1233	17.9869	17.2958	16.8218
DO112	17.5145	18.2739	18.4287	18.6102	14.0417	19.5126	15.5404	19.0559	17.2199	19.6633	20.995	16.6031	18.0792	17.5107	17.1953
DO113	16.1624	17.1082	17.9498	17.9304	13.8922	19.051	15.2487	18.6046	16.6848	19.5371	20.9797	16.8121	17.8188	17.129	16.7663
DO114	16.8601	17.7977	18.3376	18.4939	14.007	19.1951	15.6571	18.9212	17.0181	19.6444	20.9999	16.4821	17.9868	17.4298	16.7416
DO115	17.6209	18.3061	18.3785	18.4482	14.1516	19.1538	15.4646	18.8786	16.7656	19.6114	21.0364	16.6041	17.3938	16.9182	17.2193
DO116	17.0295	17.7395	18.5397	18.6576	14.7291	19.4986	15.9074	19.0871	16.9967	19.7806	21.1791	16.9376	18.0771	17.3367	17.745
DO118	16.5296	16.9043	17.3427	17.3643	13.6058	18.4873	9.89982	18.3805	16.5367	19.0548	20.23	8.91307	17.6281	17.0357	16.1252
DO119	17.5147	18.2763	18.0675	17.9669	14.1332	18.8614	10.5894	18.8159	16.8123	19.3925	20.4487	9.50558	17.9218	17.2826	16.1802
DO120	17.3933	18.0905	17.743	18.2075	13.875	18.9969	15.4761	19.0408	16.9013	19.4345	20.7157	16.4405	16.8336	16.6279	16.5546
DO121	16.7832	17.3742	18.4112	18.3582	13.8404	19.0287	15.2563	18.7115	16.7825	19.2046	20.7925	16.4746	17.1697	16.7871	17.4093
DO122	16.3375	17.0889	18.0848	17.8383	13.8643	19.1039	15.3155	18.8048	16.6623	19.3498	20.7321	16.8514	17.7329	17.0516	17.2365
DO123	17.2728	17.7318	18.239	18.0663	13.6994	19.3554	15.7384	19.0234	17.0652	19.755	20.9911	16.6016	17.9909	17.3625	16.6432
DO124	17.6774	18.1952	18.4011	18.3413	13.6575	19.1388	15.2167	18.7783	16.7062	19.4619	20.9484	16.0845	17.4381	16.9798	17.3474
DO125	17.3261	17.8762	18.2583	17.7577	13.3227	18.988	15.3266	18.625	16.7419	19.4787	21.0203	16.4763	17.9812	17.1895	16.8519
DO126	17.5282	18.0632	18.2324	18.2192	14.1185	19.3778	15.6143	18.9686	17.0864	19.7652	21.0232	16.598	18.0505	17.5014	17.3185
DO128	17.0025	17.6564	18.2816	18.3039	13.0137	19.1891	15.1471	18.9496	16.8703	19.4178	20.8496	11.0293	18.0823	17.7868	17.2802
DO129	16.6595	17.1661	18.1023	18.3733	13.1754	19.1777	15.5227	18.7257	16.6357	19.5733	20.7984	9.57352	18.1492	17.6678	17.1069
DO130	16.6557	17.2197	18.0687	17.84	13.1498	18.8063	15.1534	18.5281	16.4561	19.2066	20.6925	16.2483	16.9681	16.5911	16.8859
DO131	17.1809	17.8347	18.3774	18.6376	13.5995	19.3731	15.5303	18.8279	16.7601	19.5779	20.9786	16.0356	18.1136	17.0852	17.5814
DO132	16.6642	17.6712	18.3246	17.9373	13.5936	18.6908	15.2189	18.5707	16.3978	19.2433	20.7995	15.8737	17.6813	16.6472	16.5886
DO133	16.5305	17.1579	18.3312	18.2201	14.1383	19.0701	15.521	18.7575	16.6013	19.4437	20.7741	16.5125	17.8238	16.7308	17.1385
DO137	17.1542	17.4373	17.6471	18.1163	12.664	18.4661	14.8625	18.2285	16.2729	18.8061	20.2677	10.2678	17.4755	17.0279	15.8633
DO138	17.37	18.2297	18.4256	18.0513	13.7801	19.065	15.6497	18.7553	16.7121	19.5944	21.0154	17.1768	17.9189	17.0844	16.9991
DO140	16.3556	17.1685	18.0907	17.9369	13.1593	18.7102	15.2049	18.2989	16.135	19.1923	20.5869	15.664	17.0025	16.5893	16.5912
DO141	16.914	17.5384	18.16	18.1374	13.6559	18.73	15.2381	18.4291	16.2828	19.225	20.5947	15.8249	17.0427	16.6131	16.6554
DO142	16.7182	17.506	18.6304	18.3462	13.5909	19.1296	15.2738	18.7699	16.6713	19.4363	20.8909	16.6712	18.1018	16.7786	17.5837
DO143	17.0595	17.4114	17.8166	18.154	13.0951	18.7811	14.8303	18.5677	16.6336	19.0902	20.492	11.5283	17.6154	17.3909	16.7373
DO144	16.3546	17.4713	18.1318	18.5035	13.0528	18.8019	15.0353	18.497	16.4757	19.195	20.6556	9.06093	17.8653	17.3923	16.7045
DO145	17.3411	17.7564	17.9997	18.0701	13.3872	18.9025	9.88796	18.5136	16.3338	19.2379	20.61	17.0717	17.6821	17.1901	17.2815
DO146	17.0482	17.5671	18.1222	17.9054	14.165	18.8188	14.8586	18.8079	16.7478	19.2385	20.8192	15.9361	17.5871	16.5347	16.8369
DO147	16.8137	17.5525	18.1439	18.1959	13.8618	18.8796	15.5437	18.526	16.4784	19.3243	20.5823	16.3153	17.1492	16.5654	16.7187
DO148	17.123	17.8087	18.3112	17.919	13.696	19.024	15.4214	18.7748	16.8464	19.5058	20.8909	16.4068	17.7704	17.2276	16.5512
DO149	17.3307	18.0659	18.4342	18.4798	13.8286	18.993	15.4098	18.8562	16.8731	19.3704	20.8527	16.0714	17.9139	16.9335	17.047
DO150	15.3834	16.0505	17.3932	17.7475	13.7829	18.4137	10.5048	17.9401	15.6418	18.8184	20.0274	15.7361	16.8966	16.5002	15.9546
DO151	17.3432	18.0754	18.1819	18.284	13.9359	19.1334	15.3456	18.6512	16.7831	19.4106	20.7803	16.8103	17.6905	17.1264	17.0716
DO152	16.6162	17.1043	17.853	18.2116	13.4945	19.023	15.4002	18.4815	16.4296	19.1452	20.6635	16.3125	17.5707	16.7409	17.3004
DO153	17.8615	17.7113	18.2585	18.2053	13.5833	19.0321	14.992	18.6132	16.6683	19.4325	20.8997	16.0191	17.9551	17.0109	17.2424
DO154	16.5251	17.1214	17.909	18.2245	13.8638	18.9526	10.3822	18.6325	16.4586	19.3719	20.6726	16.8827	17.5589	17.1205	16.9229
DO155	16.3694	17.0623	17.4608	17.5635	14.055	18.7571	14.9147	18.1758	16.1672	19.0145	20.4112	16.1228	17.2192	16.6945	16.0864
DO156	16.7569	17.1294	17.6555	17.4622	13.2513	18.3961	15.1309	18.0796	15.9813	18.9909	20.3712	16.0518	16.6913	16.1714	16.2539
DO157	16.1549	16.969	17.4833	17.1418	13.6496	18.4899	14.8175	18.0295	15.8734	18.808	20.3214	16.0636	17.2019	16.5166	15.8233
DO158	17.4467	17.9154	18.4017	17.8978	13.7712	19.0076	15.3633	18.8439	16.9541	19.5186	20.934	16.6534	17.9165	17.1579	16.4849
DO159	16.9792	17.3068	18.299	18.1694	13.666	19.0588	15.3109	18.8252	16.7717	19.5926	20.9978	16.0441	17.3405	16.9336	17.1282
DO160	16.2678	16.9338	17.6911	17.687	13.6301	18.7168	14.9347	18.1761	16.1262	18.9315	20.5416	16.1592	17.4042	16.9508	16.1598
DO161	17.4235	18.0656	17.3302	17.1042	13.5459	18.4939	15.2223	18.0648	16.0968	19.1359	20.4865	16.6988	17.272	16.6249	15.6673
DO162	16.7682	17.4241	18.2703	17.7743	13.8002	18.9959	15.576	18.7211	16.8077	19.4918	20.9209	16.615	17.8457	17.1496	16.6103
DO163	17.5064	17.841	18.1461	18.0614	13.4085	18.7697	15.0688	18.5905	16.594	19.3527	20.6996	15.9482	17.7807	16.7543	16.9335
DO164	17.6728	18.141	18.3142	18.3647	13.7139	19.086	10.932	18.8108	16.8791	19.306	20.8117	17.132	17.7268	17.3232	17.3866
DO165	16.5465	16.9459	17.2639	17.1992	13.4658	18.1225	9.49472	18.1253	16.2131	18.7129	19.9327	8.85088	17.2538	16.6289	15.7535
DO166	17.8784	18.4439	18.3369	18.1542	13.7833	19.2101	15.4185	18.8117	16.7738	19.4566	20.9118	16.6175	17.9415	16.6847	17.3138
DO167	16.1521	16.9393	18.5547	18.285	14.2954	19.3541	11.1486	19.0632	16.956	19.8172	21.0017	10.5488	18.3395	17.6618	17.2138
DO168	16.4284	17.5819	18.1414	18.6389	13.1974	18.9059	10.0938	18.7504	16.6363	19.3558	20.7276	16.3362	17.5175	17.2401	16.7781
DO169	16.1316	17.2806	18.2029	18.3224	13.7958	19.0022	15.2947	18.653	16.6423	19.2545	20.6298	16.69	17.5271	16.9004	16.5802
DO170	17.7287	18.121	17.8516	18.1947	13.5935	19.058	15.0453	18.4885	16.4719	19.2807	20.7319	16.2983	17.6781	16.7402	17.2479
DO171	16.95	17.4331	18.1991	17.9702	14.0682	19.2846	15.713	19.1719	17.1473	19.6438	20.9013	17.1137	17.7518	17.1113	16.8976
DO172	15.7042	16.7756	17.5721	17.3394	13.8371	18.5091	14.73	18.3139	16.2063	18.8357	20.3525	15.8227	17.1401	16.4274	15.7705
DO173	17.7976	18.3462	18.5151	19.0186	13.5776	19.6621	15.7348	19.2126	17.3604	19.8509	21.0602	10.2248	18.5143	18.2217	17.4536
DO174	17.253	17.8207	18.2987	18.4362	14.056	19.3008	15.3093	18.8556	16.9003	19.7303	21.1286	16.2053	17.6338	17.2421	17.5693
DO175	16.4024	16.8243	17.2121	17.4517	13.7594	18.4485	15.05	18.0885	16.0894	18.7652	20.3469	15.8148	16.9416	16.4589	15.6957
DO176	16.9938	17.7312	18.349	18.7587	13.6996	19.2861	15.4998	18.6595	16.6876	19.4702	20.747	10.052	18.2634	18.0695	17.2474
DO177	15.8947	16.528	17.7473	17.4484	13.3494	18.7174	14.7607	18.543	16.4398	19.162	20.4202	9.09738	17.6803	17.2235	16.3441
DO178	16.606	17.1068	17.7147	17.6742	13.636	18.9599	15.5313	18.7575	16.7322	19.2858	20.7288	16.8837	17.4772	16.9342	16.3722
DO179	16.8172	17.257	18.1332	18.2747	13.1918	18.9337	15.0811	18.88	16.7849	19.3965	20.8023	7.75664	18.0204	17.6979	17.2135
DO180	16.2703	17.0144	18.0786	17.9714	13.6048	18.6702	15.2896	18.4093	16.0969	18.9729	20.6765	16.2767	17.3868	16.3322	16.496
DO181	17.512	17.9819	18.271	18.2162	13.8123	19.3984	15.8485	19.0162	17.0937	19.8431	20.9616	16.7554	18.0982	17.4944	16.6823
DO182	16.913	16.7133	17.8917	17.5369	13.4754	18.4894	10.1022	18.3557	16.1691	18.9752	20.5997	16.8659	17.4132	16.7892	16.2394
DO183	17.552	17.6717	18.0604	17.9887	13.1606	18.9205	10.2354	18.5054	16.3558	19.3563	20.7516	17.1706	17.0647	16.6351	16.8295
DO184	16.8354	17.8405	18.5837	18.4899	13.4461	19.3525	15.5966	19.097	16.9556	19.6064	21.1022	16.3346	17.5696	17.0985	17.3902
DO185	16.8294	17.6718	18.1705	18.129	14.0656	19.1795	15.7084	18.9177	16.9769	19.688	20.9306	16.6651	17.989	17.4507	16.7626
DO186	16.8249	17.5232	18.2878	18.6146	13.5764	19.2722	15.4289	18.9959	17.0329	19.7079	20.9258	13.1666	18.2323	17.802	17.0147
DO187	17.2805	17.8572	18.7182	18.3845	14.0335	19.2922	15.472	18.9685	17.1771	19.6484	21.0942	16.2924	18.2682	17.2211	17.1366
DO188	17.4923	18.2132	18.4333	18.32	13.848	19.0673	15.5743	18.8842	16.7705	19.6111	20.837	16.0083	17.2941	16.8674	16.7457
DO189	16.5148	17.5647	18.2201	18.235	14.0537	19.042	10.7959	18.698	16.6073	19.4641	20.8838	17.196	17.9146	17.4081	17.3002
DO190	17.3328	17.4477	17.6402	17.5483	13.7615	18.8531	10.4621	18.5529	16.5681	19.2472	20.5659	9.67087	17.7555	17.3774	16.5437
DO191	17.7727	18.1034	17.7248	17.7093	13.9995	18.8475	15.455	18.5402	16.5931	19.242	20.629	16.6975	17.451	16.8332	16.0376
DO192	16.8679	17.4486	18.0699	17.9297	14.0174	19.2755	15.4099	18.8999	16.9281	19.5535	20.919	17.0367	17.8442	17.2375	17.1212
DO193	16.7298	17.3655	18.2743	18.0613	13.3659	18.967	15.2127	18.567	16.4121	19.2799	20.769	16.0741	17.8335	16.8328	16.9499
DO194	17.9538	18.5159	18.0839	18.0935	13.5606	18.8245	15.3536	18.5004	16.4239	19.1617	20.7008	16.3692	17.5378	16.4923	16.7162
DO195	16.5332	17.3892	18.1684	18.2054	13.9451	19.2469	10.9372	18.8985	16.7995	19.6146	20.7344	10.0177	18.0726	17.7726	17.5173
DO196	15.9907	16.6331	18.026	18.1185	13.3928	19.0394	15.1779	18.7166	16.685	19.5466	20.7442	10.0625	18.0882	17.6557	16.8228
DO197	17.6187	18.0111	18.0817	18.3327	13.6909	19.1756	10.8335	18.942	16.7423	19.6332	20.8082	8.31858	18.1442	17.7343	17.0254
DO199	16.9486	17.4155	17.8384	18.1053	13.2447	18.8824	15.3103	18.5771	16.5758	19.3297	20.6674	15.773	17.0291	16.78	16.7693
DO200	17.6917	17.4947	18.1921	18.1518	13.9741	19.0863	15.5414	18.8272	16.7022	19.5194	20.9773	16.5714	17.2428	16.9032	17.051
DO201	17.1879	17.4296	18.0211	17.5889	13.786	18.7738	15.3897	18.6771	16.6857	19.2805	20.7563	16.8122	17.5518	16.8131	15.8881
DO202	16.2949	16.9922	17.8491	17.8224	13.5786	18.8561	15.4817	18.5173	16.4297	19.344	20.7677	16.7342	17.6118	16.9361	16.3191
DO203	17.0803	16.9934	18.0847	18.4104	13.1344	19.1076	15.3564	18.676	16.7019	19.6007	20.8478	11.1959	18.3047	17.9245	16.9417
DO204	17.1336	18.2248	18.5783	18.6772	14.2715	19.4718	15.7522	18.9113	16.7987	19.7517	21.0368	16.2221	18.191	17.1782	17.2914
DO205	16.6061	17.109	17.5262	17.1766	13.2686	18.746	15.297	18.4407	16.5021	19.2501	20.6059	16.6855	17.409	16.7566	16.0048
DO206	17.168	17.5277	18.1384	17.996	14.2682	18.8792	10.4862	18.5785	16.7795	19.2717	20.4868	11.4081	17.9388	17.4686	16.75
DO207	16.3837	17.1986	18.3042	17.9408	13.8541	19.0837	10.5726	18.7981	16.6817	19.3441	20.8194	9.15435	18.1194	17.5872	17.3593
DO208	17.3381	17.6424	18.3475	18.324	14.151	19.204	10.7354	19.1519	17.072	19.6369	20.773	9.63058	18.0808	17.6054	16.9356
DO209	15.3847	16.2079	17.2717	16.7249	13.5158	18.2884	14.9505	18.0576	15.7894	18.6422	20.1758	15.7499	16.9558	16.22	15.2329
DO210	16.3098	17.2121	17.7597	17.7477	13.3179	18.8843	15.4461	18.4991	16.4812	19.4248	20.6653	16.8661	17.6644	17.0394	16.4512
DO211	17.2864	17.5634	18.6241	18.5612	13.9362	19.3929	15.5827	18.9032	17.0445	19.7243	21.3624	16.5344	17.7806	17.2645	17.6886
DO212	16.6746	17.4235	18.2731	18.5627	13.4494	19.0751	15.2437	18.6182	16.4879	19.2045	20.8619	15.8371	17.833	16.776	17.1744
DO213	17.2222	17.6207	17.9929	17.8562	14.1023	18.9052	15.3225	18.5994	16.8576	19.6086	20.8183	16.9873	17.6936	17.0318	16.0057
DO214	16.8867	17.3703	18.516	18.1469	13.7395	18.9104	15.2114	18.728	16.7013	19.2969	21.0667	16.7558	17.9939	17.3509	17.0985
DO215	16.7295	17.2048	18.1094	17.788	13.5744	18.6279	15.1676	18.3367	16.3552	19.0422	20.8131	16.8347	17.5308	16.9346	16.2613
DO216	16.2185	17.1771	17.6729	17.9657	13.8792	19.0579	15.6709	18.5861	16.4549	19.3257	20.8555	17.0265	17.7233	17.1611	16.853
DO217	16.701	17.271	17.7684	18.2691	13.7412	19.0159	10.4064	18.7149	16.5157	19.4401	20.7479	16.6155	17.746	17.3328	16.8519
DO218	17.7231	18.4396	18.274	18.4066	13.6954	19.1645	10.0768	19.0962	17.0557	19.4308	20.7133	16.6584	17.8734	17.4014	17.0595
DO219	16.417	17.1388	18.0944	18.1407	13.756	19.0842	15.5105	18.8226	16.7116	19.405	21.01	16.6174	17.9275	16.7914	17.2426
DO220	16.9651	17.7016	18.5968	18.9354	14.046	19.3547	11.0699	19.1413	17.0526	19.6112	20.8647	9.37087	18.277	18.0163	17.2189
DO221	16.7833	17.0715	18.0671	18.1428	14.0853	18.9587	10.1907	18.6543	16.2911	19.4802	20.713	16.4534	17.6976	17.3302	16.8571
DO222	17.1546	17.1529	18.1612	17.8314	13.7815	18.8243	15.1649	18.6869	16.5797	19.2447	20.6977	16.4849	17.0948	16.6166	16.9282
DO223	16.9343	17.5592	17.9218	18.0956	13.8263	18.6807	15.1704	18.4028	16.2006	19.0543	20.5034	16.0501	16.8109	16.3633	16.507
DO224	16.748	17.3461	17.8833	17.9119	14.0543	18.9916	15.3285	18.5915	16.5267	19.4046	20.5971	16.8764	17.7285	16.8518	16.6798
DO225	17.2897	17.7056	17.9743	17.8783	12.9843	18.6944	15.0301	18.469	16.4539	18.8732	20.4795	16.1892	17.4965	16.3585	16.8676
DO226	17.1085	17.5964	18.2327	18.0271	14.0335	19.023	10.6558	18.7375	16.5842	19.4205	20.6861	9.59581	18.1415	17.7253	17.2461
DO227	17.0445	17.5802	18.1606	18.0598	13.4181	18.7327	10.0303	18.573	16.4755	19.0164	20.4545	16.7929	17.4209	16.905	16.566
DO228	17.483	17.8576	17.9294	17.9187	13.6104	18.6549	14.8485	18.2168	16.0222	19.1508	20.6363	16.1416	16.8822	16.4352	16.5617
DO229	16.6411	16.9368	18.1281	17.8178	13.532	19.0389	15.3592	18.6728	16.6344	19.5976	20.7348	16.3846	17.7291	17.0884	16.5242
DO230	15.9667	16.2817	17.1869	17.3196	13.3778	18.1869	9.4543	18.0644	15.9441	18.4956	20.0603	15.6006	16.0815	15.6672	15.8123
DO231	17.2765	17.3672	17.8039	17.8326	13.0698	18.7383	15.0988	18.5677	16.539	19.2802	20.4662	10.1389	17.7658	17.2259	16.1532
DO232	17.2235	17.8505	18.3218	18.302	13.5381	19.011	15.2902	18.7002	16.6569	19.4226	20.7328	16.0173	17.3493	16.907	17.1286
DO233	16.399	16.9041	18.0219	17.8975	13.3823	18.7236	10.2906	18.3616	16.1727	19.1011	20.6371	16.8862	17.51	16.9644	16.7967
DO234	16.4493	16.7216	17.7676	17.7484	13.2513	18.7472	15.1516	18.4962	16.2391	19.3076	20.5822	15.7908	17.5586	16.5529	16.6386
DO235	16.4915	17.178	18.0643	17.7598	13.9182	18.7935	10.3391	18.3801	16.0919	19.4053	20.6038	17.1436	17.7415	16.9745	16.8876
DO236	17.0517	17.5957	18.3878	18.2322	13.852	19.153	15.4557	18.6794	16.7042	19.4782	20.721	16.1009	17.3624	17.0062	17.2021
DO237	16.5021	17.0018	17.449	17.2749	13.4219	18.3716	14.9674	18.2401	16.2896	18.8543	20.1553	15.8152	16.9596	16.4197	15.4465
DO238	16.7651	17.3902	18.1634	17.7424	13.7616	18.9663	15.5326	18.8575	17.0321	19.474	20.8309	16.9036	17.732	16.9684	16.2604
DO239	16.5061	17.2793	17.5584	17.2483	13.7415	18.4717	14.6987	18.3774	16.4152	18.8498	20.4218	15.9977	17.1782	16.4916	15.852
DO240	16.7394	17.3096	17.9728	17.7381	13.4479	18.582	15.1204	18.4959	16.2922	19.0558	20.488	16.1593	16.7857	16.192	16.3169
DO241	17.5699	17.2603	18.042	18.3456	13.2104	18.754	15.2568	18.568	16.6252	19.1832	20.5541	10.5034	17.8578	17.3549	16.2127
DO242	17.4725	18.0187	18.0001	18.2211	13.1613	18.7771	15.0467	18.4619	16.5844	19.2785	20.5695	9.80656	17.9636	17.47	16.4037
DO243	16.6278	17.4086	18.2036	17.7304	13.4366	18.8824	15.4392	18.6426	16.7801	19.443	20.6984	16.3604	17.6783	16.9831	16.1491
DO244	16.3318	16.6364	17.7485	17.2068	13.551	18.7307	15.2249	18.451	16.4851	19.3784	20.7148	16.739	17.5844	16.798	16.1767
DO245	16.5446	17.0888	18.4935	18.1692	13.4556	19.1191	15.5216	18.7526	16.6111	19.3809	20.8764	16.6435	17.87	16.7601	17.3853
DO246	16.8747	17.1992	17.8828	17.7183	13.8325	19.0423	15.5341	18.6636	16.6569	19.6796	20.8286	16.4958	17.8335	17.1996	16.406
DO247	17.1891	17.4386	18.3474	18.105	14.0098	19.1274	10.3641	18.9568	16.9997	19.4287	20.9372	16.9935	17.878	17.3854	17.4074
DO248	17.0089	17.6034	18.0244	17.8662	13.7055	18.4139	9.5674	18.1502	16.211	18.6561	20.4773	16.3669	17.3677	16.8259	16.4847
DO249	16.5916	17.3417	18.2659	17.7322	13.9691	18.9653	15.55	18.6025	16.5918	19.6297	21.0917	16.5668	17.9375	17.2669	16.6409
DO250	17.6626	17.9455	17.9028	17.7711	13.3696	19.1082	15.785	18.9461	17.0254	19.4614	20.8124	16.9433	17.5932	16.9812	16.2527
DO251	16.0596	16.5296	18.0923	18.2601	13.0781	18.8753	15.0327	18.7843	16.7708	19.2961	20.5105	11.8111	17.7304	17.4943	16.915
DO252	16.9479	17.7572	18.1481	18.1865	13.6602	18.8965	15.2566	18.6268	16.5792	19.0861	20.4043	16.2566	16.9708	16.5477	16.8822
DO253	16.1448	16.9407	17.8472	17.9217	13.675	19.0665	15.5889	18.6683	16.6294	19.5662	20.8644	16.2245	17.8097	17.1998	16.7857
DO254	16.46	16.8581	17.4516	17.3393	13.7436	18.3183	15.0624	17.9423	15.951	18.819	20.274	16.2768	17.0167	16.4605	15.4061
DO255	16.1372	16.9644	17.5367	17.2159	12.9278	18.3811	14.736	18.1548	15.9288	18.849	20.3784	15.4043	17.2884	16.2462	16.109
DO256	16.1646	16.7306	18.1525	17.6453	13.5129	18.7362	10.6252	18.5084	16.4086	19.0984	20.6135	10.6797	17.7197	17.1705	16.4836
DO257	16.6997	17.2048	18.0438	18.4898	13.1121	19.0634	15.2523	18.7444	16.8178	19.3726	20.6295	10.0423	17.9865	17.5688	16.9166
DO258	16.5441	17.1148	18.0395	17.9193	13.793	19.113	15.6275	18.7891	16.842	19.6433	20.8921	16.4241	17.7913	17.313	16.5835
DO259	16.9244	17.3608	18.1621	18.1191	13.1339	18.9031	15.2384	18.7518	16.7766	19.3461	20.7323	10.0672	17.8839	17.4514	16.3384
DO260	16.8863	17.409	18.2414	17.9351	13.6753	18.673	10.4258	18.6578	16.4588	19.1609	20.5655	10.1607	17.899	17.0825	16.3582
DO261	16.5635	16.9881	17.6083	17.5146	13.3915	18.3843	14.9986	18.1258	15.8789	18.8206	20.2384	15.8516	16.955	15.8878	15.8739
DO262	16.7586	17.4057	17.5384	17.7034	13.1596	18.329	14.6646	17.9731	15.7992	18.7112	20.2929	15.8358	17.1131	16.0824	16.2326
DO263	16.6694	17.3078	18.1149	18.0103	13.4998	18.8127	15.1821	18.6471	16.4331	19.1374	20.8669	15.7719	17.569	16.5427	16.6093
DO264	16.1234	17.0833	18.0264	18.0291	13.4915	18.8909	15.4057	18.3429	16.1944	19.1713	20.5117	16.3236	16.9295	16.4662	16.8014
DO265	15.1771	16.1425	17.3787	17.1871	13.5319	18.412	14.8119	18.1805	16.0546	18.7418	20.1611	15.7541	17.0051	16.3803	15.6814
DO266	16.8125	17.2776	18.1099	17.9553	13.1785	18.7402	14.9427	18.6711	16.5805	19.0551	20.5899	16.3654	17.588	16.4864	16.8847
DO267	16.1778	16.6687	17.6288	17.558	12.8227	18.2321	14.5171	18.043	16.046	18.4573	20.154	9.34313	17.2959	16.7749	15.7867
DO268	16.228	16.9985	17.9808	18.277	13.4728	18.9001	15.1447	18.5481	16.4805	19.2298	20.5655	16.263	17.0544	16.6002	17.1531
DO269	15.6005	16.4173	17.536	17.0603	13.4162	18.419	9.93035	18.1466	16.2421	19.1158	20.2934	10.0102	17.6341	16.8671	15.9704
DO270	15.8298	16.5223	17.7734	17.8984	13.9014	18.6556	14.6868	18.3833	16.2904	18.9436	20.3166	15.4402	16.6235	16.2246	16.553
DO271	17.2251	17.5833	18.5735	18.2505	13.5338	19.1611	15.4078	19.0232	16.9885	19.5443	21.1439	16.1943	18.1906	17.212	17.6821
DO272	16.664	17.277	17.9149	18.0804	13.5574	19.2163	15.8443	18.9255	16.9291	19.6427	21.0158	16.4798	17.7823	17.3741	16.7166
DO273	16.2239	17.4619	18.4116	18.6447	13.5538	19.3488	15.2586	18.9361	16.9385	19.4539	20.8974	10.6941	18.1761	17.9351	17.4762
DO274	17.0929	17.3665	17.8757	18.118	13.6216	18.8207	10.1483	18.7562	16.5736	19.2485	20.6537	16.9264	16.854	16.359	16.3895
DO275	16.4748	17.1992	17.9324	18.2562	13.6457	18.9932	15.0231	18.7606	16.7699	19.1902	20.7038	15.8074	16.8726	16.6313	16.9202
DO276	16.935	17.7554	18.3646	18.2131	13.7319	19.0437	15.3396	18.6136	16.4814	19.3915	20.7616	16.5412	17.8491	16.7673	17.1413
DO277	16.4503	17.4916	18.412	17.9444	13.7535	18.9562	15.3403	18.6182	16.5133	19.2724	20.82	16.6409	17.1538	16.6781	16.9941
DO278	17.2656	17.7167	18.3455	18.5326	13.9385	19.1312	15.3699	18.8496	16.8418	19.7143	21.0477	16.1538	17.5983	17.0964	17.3156
DO279	16.762	16.7713	17.5444	17.6542	13.7335	18.3598	10.506	18.3509	16.284	18.8533	20.224	15.9356	17.1333	16.5815	16.2323
DO280	16.9721	17.4928	18.4461	18.0692	13.7852	19.1129	11.1425	19.0328	17.0367	19.705	20.9294	9.80339	18.2569	17.5841	16.4352
DO281	16.6501	17.3753	18.103	18.0402	13.9878	18.7559	15.0966	18.5232	16.343	19.2402	20.7348	16.3447	17.4731	16.4105	16.5397
DO282	16.0327	16.9145	17.7732	17.6962	14.0081	18.7793	14.9195	18.49	16.315	19.1438	20.6311	16.2481	17.4702	16.8797	16.3572
DO283	16.9698	17.6684	18.3119	18.6668	13.8339	19.3075	10.9094	18.9328	16.8663	19.68	21.057	17.3832	17.3393	16.8375	17.0792
DO284	15.9182	16.8079	17.6907	17.6715	13.7147	18.862	15.3109	18.4344	16.33	19.3107	20.7559	16.8986	17.5057	17.0027	16.5746
DO285	17.7316	18.008	18.4471	18.4917	14.0728	19.4642	15.9605	19.2685	17.1707	19.8871	21.2487	16.2265	17.5405	17.1785	17.2033
DO286	16.5635	17.4693	18.1913	18.1951	13.6173	19.0032	15.4918	18.7057	16.5495	19.4785	20.8291	15.9245	17.2403	16.8588	16.8839
DO287	16.9615	17.9365	18.534	18.6859	13.6597	19.3972	15.5862	19.1864	17.1164	19.8056	21.1899	16.3393	18.2516	17.3042	17.7234
DO288	16.7482	17.3377	17.2369	17.1732	13.6036	18.6409	15.1592	18.4046	16.3215	18.9682	20.2354	15.7954	17.1085	16.5635	15.9214
DO289	16.7152	17.4887	18.0468	18.0665	13.6277	19.05	15.5941	18.847	16.8043	19.5109	20.8361	17.1194	17.795	17.0836	16.8263
DO290	17.2287	17.7979	18.1009	18.1514	14.1481	19.1398	15.5741	18.9446	17.1048	19.6535	20.8891	16.6109	17.9436	17.3809	16.6609
DO291	16.2155	17.3219	18.4914	18.1616	13.4932	18.9484	15.4635	18.7745	16.6974	19.0165	20.9482	16.6843	17.2292	16.6824	17.1674
DO292	17.4296	17.7377	18.1333	18.3041	13.6293	18.9401	15.2971	18.5913	16.608	19.368	20.6703	10.6398	17.9707	17.4971	16.5774
DO293	17.2854	17.8478	18.1216	18.1775	13.666	19.0093	10.7747	18.9654	16.9966	19.5091	20.7757	10.2813	17.944	17.5347	16.3971
DO294	16.5081	17.2841	17.9481	17.7465	13.4993	18.6704	15.0128	18.5442	16.4639	19.0968	20.752	16.391	16.9599	16.4807	16.7155
DO295	17.3777	17.8776	18.1133	17.5993	13.6651	18.8297	15.3747	18.5826	16.6178	19.2549	20.7587	16.9132	17.4958	16.7739	15.9353
DO296	16.0411	16.6246	17.9086	17.7574	13.2535	18.7369	15.5566	18.5142	16.5593	19.2297	20.8846	16.6941	17.5202	16.868	16.1625
DO297	15.6947	16.784	17.3947	17.3556	13.4543	18.2051	14.5663	18.028	15.6192	18.3686	20.1772	15.1831	16.3108	15.8085	15.8879
DO298	15.2667	16.1869	17.1593	17.4381	13.1344	18.3286	14.55	18.1125	15.8323	18.5557	20.2183	15.1606	16.8328	15.9473	16.051
DO299	17.4215	17.7842	18.0874	18.2928	13.439	19.1086	15.4268	18.66	16.579	19.3022	20.8197	15.874	17.0797	16.7932	16.8512
DO301	17.2788	17.6783	18.0732	18.2901	13.8098	19.1089	15.4042	18.7677	16.7316	19.487	20.944	16.486	17.7929	16.8316	17.1365
DO302	16.5273	17.2158	18.0986	18.3811	13.0651	19.0602	15.4149	18.7528	16.7924	19.3619	20.7714	11.1323	17.9789	17.6611	16.6955
DO303	16.8624	17.2756	18.3666	18.6505	13.315	19.2072	15.6753	18.9671	16.9052	19.5542	20.9168	7.6247	18.2048	17.7727	16.6625
DO304	17.4468	17.5231	17.8212	18.3626	13.713	18.8202	11.0281	18.4115	16.2972	19.3544	20.8047	16.5581	17.0603	16.6252	16.489
DO305	16.9133	17.6976	18.3261	18.3272	13.9	19.1206	15.3782	18.6895	16.6508	19.3813	20.7684	16.6216	17.3141	16.81	17.4306
DO307	16.8453	17.746	17.9182	18.43	13.8848	18.8942	15.0578	18.8583	16.7583	19.2335	20.6435	15.7177	17.511	16.4593	16.7787
DO308	17.468	18.0938	18.3527	18.3238	14.1769	19.3207	10.8614	19.1476	17.1389	19.6585	20.9235	9.72867	18.3077	17.9087	17.4005
DO310	16.7186	17.559	18.2528	18.6064	13.8879	19.3969	15.6193	19.1695	17.256	19.6344	20.8338	10.5444	18.2314	17.9912	17.5284
DO309	17.0044	17.6744	18.1503	18.1729	14.1596	18.9801	15.3636	18.6564	16.5507	19.4043	20.8167	16.4999	17.7481	16.7035	16.7398
DO311	17.1638	17.7684	18.0831	18.0569	13.9046	19.0168	10.8589	18.8591	16.7153	19.534	21.011	16.5537	17.7625	17.2572	16.725
DO312	17.2358	17.5414	18.4798	18.284	13.6327	19.2178	15.5624	18.7924	16.685	19.523	21.0974	16.7456	18.0026	17.6507	17.4942
DO313	16.7834	17.3922	18.028	18.0268	13.9805	18.8794	10.6471	18.4898	16.3714	19.343	20.6919	17.125	17.6856	17.1855	16.9897
DO314	16.7672	17.5164	17.7022	17.797	14.0195	18.7003	9.95698	18.6793	16.508	19.0424	20.6449	16.2147	17.3462	16.9147	16.2886
DO315	15.9514	16.5073	17.5443	17.2637	13.5881	18.2748	14.6394	18.193	15.939	18.8294	20.4358	15.1704	16.9746	15.8085	16.075
DO316	15.9695	16.7013	17.6089	17.5953	13.6738	18.9463	15.69	18.5335	16.5001	19.2717	20.7797	16.9233	17.5338	16.9663	16.3679
DO317	16.6193	17.2985	18.1476	17.8676	13.4199	19.0894	15.5161	18.5586	16.5598	19.5908	20.9408	16.3405	17.8853	17.1064	16.8642
DO318	16.2144	16.8624	17.5612	17.8808	13.3693	18.5679	14.9281	18.2005	15.9809	18.8562	20.4265	15.8482	17.0113	16.0408	16.1332
DO319	17.1524	17.5723	18.1248	18.2322	13.025	19.1002	15.464	18.9138	16.9094	19.401	20.763	10.5518	18.0229	17.5944	16.5201
DO320	16.9106	17.7026	18.0591	17.9512	13.1958	19.0005	15.2376	18.7049	16.6578	19.4824	20.9274	15.9839	17.8043	16.8584	16.9933
DO321	16.4217	16.3102	17.6074	17.5938	12.2589	18.2598	14.3994	18.0791	16.0397	18.6397	20.1229	9.24789	17.3984	16.7761	15.8805
DO322	16.4117	17.1392	18.1222	17.723	13.2414	18.5316	14.8343	18.3485	16.0908	18.8513	20.6159	16.06	16.7487	16.3589	16.7107
DO323	16.1162	16.8619	17.8262	18.1842	13.201	18.794	10.2834	18.3348	16.0962	19.0126	20.6403	16.9159	16.9319	16.4909	17.1214
DO324	17.1856	17.4334	18.1987	17.9868	13.2686	18.5014	15.0682	18.2114	16.0621	18.7599	20.7052	15.7639	16.9544	16.5026	16.489
DO325	16.4065	16.2532	17.8131	17.9114	12.6748	18.5703	14.8626	18.3119	16.3344	18.9916	20.4273	10.3975	17.6566	17.1124	15.9691
DO326	17.2883	17.8963	18.7467	18.5165	13.7309	19.3021	15.502	18.8792	16.8567	19.7395	21.1297	16.2192	18.1757	17.1421	17.4041
DO327	17.7445	17.9032	17.8978	17.3733	13.5809	18.5861	15.1506	18.4709	16.5486	19.0399	20.6093	16.7521	17.403	16.7138	16.0707
DO328	17.5903	17.6354	18.0044	17.8283	13.612	18.9508	15.2412	18.5434	16.7212	19.4468	20.773	16.4064	17.6943	17.2354	16.8549
DO329	16.7156	17.2673	18.3339	18.2373	13.5483	18.9782	10.1533	18.3658	16.2098	19.2573	20.749	16.3715	17.6982	17.194	17.1013
DO330	16.4253	17.1968	17.7514	18.069	13.9482	18.6749	15.2289	18.2679	16.0253	19.1994	20.4915	15.8741	17.2502	16.0927	16.1984
DO331	16.9403	17.4925	18.6003	18.3985	13.6529	19.3491	15.8603	19.1034	17.0436	19.8557	21.0703	16.2193	17.6277	17.1314	17.3117
DO332	17.3585	17.735	17.8852	17.6946	13.5979	18.803	15.2137	18.6827	16.8498	19.4696	20.4814	16.0964	17.5632	16.9003	16.1293
DO333	17.8357	17.9931	18.0958	18.2067	13.6562	19.2326	10.5245	18.7663	16.674	19.6979	20.7779	16.8284	17.3232	16.9049	16.9616
DO335	15.8145	16.2204	18.0685	17.7386	13.8746	18.7902	10.6058	18.3624	16.1962	19.2659	20.5365	10.35	17.8747	17.2028	16.4022
DO336	16.0706	16.6057	17.3063	17.4488	13.4619	18.1663	14.2768	17.7977	15.5234	18.3583	20.1623	14.9685	16.7637	15.8527	15.9792
DO337	16.9513	17.5032	18.0227	18.0967	13.1624	18.6536	15.1004	18.3505	16.3329	19.1658	20.4925	15.692	16.9882	16.4562	16.583
DO338	17.3227	17.8463	18.5454	18.6163	13.9897	19.3111	15.3013	18.9595	17.0938	19.5979	21.0384	16.2641	17.5133	17.1506	17.8277
DO339	15.9502	16.3211	17.3618	17.142	13.7523	18.2124	10.3858	18.0624	15.9285	18.5022	20.0174	15.8567	16.8665	16.3628	15.9185
DO340	17.0387	17.5818	18.3169	18.0155	13.4536	19.0402	15.4877	18.8105	16.7735	19.3877	20.9776	16.5676	17.2323	16.7544	17.226
DO342	16.8194	17.1726	17.7316	17.8394	13.758	18.509	15.1647	18.2099	16.0139	19.0794	20.2948	15.8954	16.675	16.2224	16.2383
DO343	19.7312	19.7143	18.0468	17.5946	11.6727	18.9725	15.562	18.4826	16.4969	19.2829	20.8226	16.3212	17.2392	16.8905	15.7804
DO344	17.1359	17.4781	17.9202	17.6059	13.5889	18.6588	10.2124	18.4178	16.3582	19.1573	20.3752	8.97207	17.654	17.1317	16.1773
DO345	17.2419	17.6941	18.0311	17.7328	13.6027	18.706	15.3514	18.4408	16.575	19.0198	20.6913	16.7735	17.3525	16.8236	16.0714
DO346	16.7702	16.9464	18.3218	17.7323	13.4405	18.4078	14.9028	18.2526	16.4716	18.7864	20.7097	16.3142	17.6112	16.845	16.3478
DO347	16.4373	16.9273	18.0868	18.2888	13.0647	18.9948	15.1926	18.8027	16.7368	19.3427	20.7451	11.2346	18.037	17.7471	17.1452
DO348	17.1161	17.2587	18.4601	18.371	13.595	19.159	15.1448	18.8383	16.8376	19.5839	20.8366	15.8407	18.1375	17.0645	17.5062
DO349	17.313	17.977	18.563	18.8681	14.3736	19.5598	11.0766	19.3798	17.3398	19.7668	20.8788	16.8257	18.0347	17.7062	17.531
DO350	17.1993	17.3863	18.4159	18.4125	13.7624	19.4609	15.7906	19.0905	16.9274	19.8776	21.0412	16.2149	17.5575	17.1341	17.552
DO352	15.791	16.6717	17.4563	17.1827	13.4554	18.2998	14.7158	17.9383	15.9192	18.6692	20.2914	15.9134	17.125	16.5569	15.9316
DO353	16.0007	16.5437	17.7768	17.9829	13.6804	18.5782	9.93167	18.2104	16.0622	18.9117	20.3665	16.6797	17.3159	16.9045	16.6685
DO354	17.8963	18.2374	17.9784	17.9331	13.0921	18.6021	14.795	18.5378	16.4696	19.055	20.4854	9.35763	17.7693	17.3937	16.3929
DO355	17.0313	17.4875	17.9504	17.9583	13.4655	18.697	15.024	18.4932	16.3876	19.371	20.6984	15.6057	16.9554	16.5376	16.5423
DO356	15.7154	16.219	17.7332	17.7016	12.886	18.4322	14.8339	18.2466	16.262	18.9942	20.3449	10.5634	17.5834	17.0443	15.877
DO357	16.8399	16.6895	17.2611	17.0376	12.9304	18.1508	14.6	17.9223	15.7679	18.7885	20.2093	15.7278	16.2897	15.826	15.7965
DO358	15.5751	16.8381	17.9513	17.8334	14.0773	18.7698	15.2032	18.396	16.2465	19.1918	20.6465	16.1197	17.4975	16.7316	15.8616
DO359	16.9746	17.2373	18.112	17.8934	13.0583	18.6293	15.0283	18.2989	16.2433	19.0108	20.4659	15.6571	16.9616	16.4489	16.5608
DO360	16.5098	16.9443	18.0945	17.6385	13.5933	18.9957	15.3388	18.5623	16.6458	19.5012	20.7488	16.3817	17.8118	17.1981	16.6203
DO361	16.4761	17.7107	18.7623	18.3416	13.77	19.3283	10.2033	19.1963	17.1155	19.6771	21.1192	17.279	18.0191	17.3243	17.6299
DO362	16.3903	16.9801	18.0897	17.5816	14.0944	18.872	15.4966	18.6915	17.0241	19.2054	20.7782	16.7684	17.5661	17.1201	16.7531
DO363	16.4652	16.7806	18.2117	18.3273	13.2693	18.8954	15.2348	18.5314	16.3387	19.3496	20.6892	11.4031	18.0266	17.4024	16.7959
DO364	16.444	16.9829	18.0692	17.5547	13.3232	18.6884	15.2224	18.4504	16.5073	19.0585	20.7679	16.3216	17.527	16.9571	16.3741
DO365	16.5881	16.8921	17.4771	17.5745	13.4401	18.2269	14.8273	17.9633	15.7251	18.7945	20.3106	15.7896	17.0316	15.969	15.8351
DO366	17.0046	17.7405	18.3795	18.0145	13.2751	18.9029	10.3366	18.5496	16.5524	19.3247	20.8378	16.6568	17.9004	17.3445	17.2137
DO367	17.1893	17.5579	18.7212	18.3522	13.8974	19.4397	15.7716	18.9763	17.0497	19.7854	21.2369	16.7277	18.1779	17.3894	17.438
DO368	16.2057	17.2595	18.2506	17.9558	13.7209	18.8352	15.1879	18.5323	16.4339	19.0894	20.8711	16.5883	17.7607	16.6213	17.2818
DO369	16.9152	17.683	18.4807	18.2346	13.6534	18.927	15.1817	18.6066	16.6258	19.4565	20.8563	15.9512	17.3164	16.8246	17.1644
DO370	16.6716	17.1293	17.7359	17.703	13.1467	18.5817	15.0519	18.2148	16.169	18.9583	20.5173	16.2423	17.3701	16.3909	16.7654
DO371	17.2517	17.2118	17.9064	18.2259	13.3337	18.7833	15.2037	18.6561	16.49	19.3399	20.6925	15.6551	17.5034	16.6524	16.528
DO372	15.8535	16.6383	18.1003	18.135	13.8456	19.1755	15.8051	18.9633	16.7941	19.6169	20.9929	16.9873	17.7606	17.1675	16.561
DO373	17.0389	17.5018	18.6446	18.2398	13.6537	19.2519	15.7102	18.9486	16.8512	19.597	21.07	16.3219	17.532	17.0597	17.3888
DO374	16.4227	16.9192	17.826	17.6771	13.6268	18.4613	10.882	18.542	16.3469	18.8946	20.4032	16.6914	17.1897	16.6319	15.9322
DO375	16.5248	16.9873	18.1486	18.2182	13.3471	19.0874	15.6995	18.9479	17.0206	19.5097	20.8118	10.3725	18.0731	17.6495	16.8157
DO376	16.4534	17.0586	17.9418	17.8745	13.2954	18.7365	15.2698	18.4404	16.1919	19.1181	20.751	15.8523	17.6654	16.5458	16.744
DO377	16.1949	16.634	17.5666	17.7902	12.7107	18.5294	14.8685	18.5033	16.5461	18.8577	20.2531	9.6172	17.4689	16.9787	15.8888
DO378	17.0578	17.5171	18.0908	18.4549	14.1961	19.0011	15.625	18.5737	16.5425	19.3373	20.7099	16.5158	17.1781	16.7275	17.0232
DO379	17.3159	17.7266	18.1538	17.866	13.5604	18.7716	15.3426	18.6022	16.5259	19.126	20.7779	16.3904	16.9728	16.4345	16.5135
DO380	16.1397	16.7294	17.3638	17.3972	13.4752	18.3643	14.6059	17.8728	15.5708	18.6529	20.2886	15.2398	16.7613	15.9308	16.0378
DO381	17.0367	17.6986	17.5729	17.841	13.4594	18.5912	15.1421	18.5842	16.3483	19.0548	20.5342	16.1495	16.6459	16.1408	16.1621
DO382	16.799	17.4853	18.1206	18.4249	14.0679	19.1271	10.9076	18.666	16.6239	19.4602	20.8552	16.6911	17.901	17.566	16.9403
DO383	16.3907	17.0199	17.7126	17.656	13.6375	18.5226	14.8972	18.2688	16.0203	18.8724	20.503	15.4383	17.1784	16.166	16.0524
DO384	15.743	16.1878	17.8358	17.4683	12.671	18.1542	14.4282	18.1928	16.0608	18.2871	20.2121	10.4001	17.2523	16.819	16.0207
DO385	16.7476	17.9586	18.2009	18.2053	13.5404	19.2325	15.591	18.8435	16.7247	19.3705	21.0441	16.6247	17.7941	17.3916	17.1654
DO386	16.1452	17.0697	17.978	18.0676	13.6632	18.7862	9.96379	18.6672	16.6226	19.0779	20.7177	16.4981	17.5306	17.0658	16.788
DO387	17.1169	17.5678	18.0232	18.0945	13.5963	18.8147	15.2923	18.6067	16.3204	19.4363	20.9375	15.7733	17.1269	16.6616	16.6826
DO388	17.6389	18.2318	17.7112	18.0668	13.6647	18.7678	15.0716	18.5058	16.4388	19.0249	20.5778	15.6099	16.7651	16.2899	16.4099
DO389	16.918	17.3995	18.293	18.344	13.9178	18.7595	14.9004	18.7136	16.6624	19.1006	20.7334	16.0208	17.1516	16.6523	17.1132
DO390	17.2113	18.5351	18.4243	18.3688	13.9222	18.9273	15.2736	18.7158	16.5509	19.2221	20.8176	16.5201	17.3293	16.7004	17.0981
DO391	16.5911	17.45	18.0209	18.2251	13.8083	18.6797	15.4808	18.3867	16.2689	18.9785	20.6458	16.0387	16.9314	16.4693	16.4689
DO392	17.4815	17.9427	18.1749	18.3532	13.6853	18.874	10.75	18.8571	16.8257	19.3254	20.4967	10.0383	17.8975	17.2956	16.4708
DO393	16.5144	17.0549	17.9145	17.5549	13.3738	18.7437	15.3873	18.4205	16.3788	19.1523	20.7952	16.9086	17.4987	16.8616	15.9192
DO394	15.9483	16.5998	17.4641	17.5918	13.2303	18.068	14.3945	18.1131	15.7067	18.661	20.3934	15.4454	16.6591	15.8935	16.2567
DO395	16.7695	17.5516	18.0168	18.2632	13.5561	19.03	10.7065	18.7882	16.7177	19.3151	20.6692	17.0896	17.631	17.1989	17.3023
DO396	16.5826	17.2223	17.7224	17.398	13.7586	18.7359	15.1047	18.4698	16.4134	19.0681	20.5284	16.3119	17.5086	16.8979	16.1008
DO397	15.9003	16.8385	17.3842	17.4249	13.7573	18.6563	14.9961	18.4183	16.2919	18.9707	20.3155	16.0431	17.2033	16.6527	16.0558
DO398	17.571	17.8026	17.7549	17.9586	12.8608	18.7068	15.0423	18.5244	16.5016	19.2844	20.6983	15.8366	17.0962	16.7005	16.6743
DO399	17.3477	17.6977	18.3154	18.3207	13.489	18.8329	10.8117	18.7053	16.5918	19.1031	20.7665	16.7441	17.9391	17.369	17.2239
DO400	17.1097	17.6556	17.621	17.799	13.6545	18.6713	10.3132	18.4789	16.3834	19.3153	20.6041	16.2715	17.4729	17.0698	16.4173
DO401	17.0371	17.9647	18.1252	18.4599	13.9446	18.8979	15.4521	18.6376	16.6131	19.2753	20.6927	17.0408	17.6716	16.5727	16.8376
DO402	17.6659	18.0713	18.3324	18.0181	13.8099	19.2504	15.3586	18.8946	16.9853	19.6301	20.9717	16.6488	18.0404	17.3852	17.4575
DO403	16.6793	17.0408	18.1235	18.3752	13.0887	18.9194	15.3405	18.5523	16.4056	19.3855	20.7989	9.29088	18.0814	17.576	16.7562
DO404	17.0984	17.5531	18.1492	18.4369	13.1653	19.1581	15.1321	18.8137	16.7793	19.5632	20.7841	9.20493	18.2256	17.904	17.261
DO405	16.4839	17.5948	18.0392	18.1401	13.6095	18.8777	10.3209	18.5089	16.386	19.3085	20.6823	16.4676	17.6011	17.1214	16.5511
DO406	17.031	17.6339	18.0368	17.7203	13.8332	18.6775	15.2918	18.4992	16.3363	19.1936	20.7219	16.3123	17.4614	16.3941	16.4572
DO407	16.1678	16.8524	17.5339	17.8048	13.2774	18.2597	14.661	18.0213	15.7879	18.4777	20.2225	15.243	16.8521	15.9248	15.9783
DO408	17.0099	17.6872	18.2013	18.3013	13.7361	19.3282	15.7888	18.7726	16.7379	19.8819	21.1325	16.7886	18.2549	17.5297	17.1126
DO409	17.0397	17.8222	17.9298	17.7891	13.5884	18.8471	15.2033	18.4276	16.5922	19.4142	20.6657	16.3043	17.6479	16.9998	16.2051
DO410	16.1236	16.5777	17.2858	17.309	13.2711	18.2272	14.365	18.2333	16.3727	18.5222	20.2194	15.1997	16.6324	16.024	15.6239
DO411	16.7588	17.4724	18.0792	18.2434	14.1209	19.4546	15.5103	18.9788	17.0519	19.5993	21.0137	17.0464	17.8129	17.3683	17.6731
DO412	16.8553	17.2206	17.5981	17.4059	13.5089	18.4526	14.9262	18.1417	16.194	18.9844	20.451	16.4065	17.1403	16.4946	15.5266
DO413	16.9194	17.2409	17.9539	17.9499	13.643	18.9406	10.3649	18.729	16.5657	19.4382	20.6957	16.4935	17.706	17.2466	16.7004
DO414	16.9447	17.6377	18.0451	17.9189	13.8651	19.151	15.361	18.7546	16.7798	19.472	20.9522	17.061	17.8208	17.2669	17.2855
DO415	17.7303	17.9773	18.011	18.1496	13.7442	19.2958	15.5385	18.9143	17.0246	19.5652	20.8905	16.6577	17.8795	17.3824	16.835
DO416	17.2808	17.4755	18.1186	18.3087	13.5599	19.0479	15.3508	18.7897	16.9518	19.4335	20.7646	11.1441	18.1141	17.6915	16.9225
DO417	16.5455	16.5436	17.2841	17.2985	13.6142	18.1478	14.4704	17.9464	15.7466	18.4212	20.2064	15.7233	16.9653	16.4701	16.031
DO420	16.8949	17.4435	18.2791	18.2622	13.5222	19.0462	15.3988	18.9519	16.8655	19.398	20.9745	15.9526	17.8002	16.7235	16.8319
DO461	16.9089	17.8188	17.9754	17.6934	13.4112	18.8494	14.9957	18.529	16.5608	19.2355	20.7539	16.8618	17.6633	16.963	16.9635
DO462	16.7125	17.3093	17.9049	18.03	13.7302	18.839	15.3951	18.401	16.2482	19.2704	20.4138	16.2535	16.9028	16.4249	16.625
DO463	17.0312	17.3641	17.7023	17.7509	13.3705	18.78	14.9897	18.2941	16.1964	19.0667	20.5364	16.1258	16.7863	16.4989	16.7784
DO464	16.8435	17.1204	17.5427	17.4034	13.0333	18.2399	14.5701	18.0401	16.0694	18.6032	20.0902	9.7245	17.3518	16.8745	15.8615
DO465	16.9232	17.4681	18.2386	18.0445	12.7823	18.8529	15.1783	18.611	16.4607	19.3258	20.715	12.7649	17.942	17.5428	16.9264
DO466	16.2067	17.1607	17.8871	17.8129	13.5877	18.7349	10.2766	18.2935	16.0989	19.2207	20.534	16.8644	17.4299	16.8258	16.5085
DO467	15.6599	16.3667	17.5928	17.4114	13.9013	18.6587	14.9848	18.0923	15.8468	19.2331	20.5941	16.1173	17.4433	16.7414	16.1762
DO468	16.0918	16.5076	17.355	17.4162	12.9229	18.2084	14.5552	17.793	15.7452	18.5502	19.9812	7.10643	17.2735	16.7868	15.8434
DO469	15.8443	16.7152	17.71	17.502	13.3969	18.2707	14.7324	18.0995	15.8183	18.588	20.3174	15.3117	16.8747	15.901	16.0923
DO470	16.5754	16.9274	18.0005	18.1957	13.4966	18.8598	10.6404	18.3679	16.2423	19.3124	20.4488	16.5762	17.0581	16.6546	16.879
DO471	16.9467	17.2639	17.524	17.6235	13.774	18.655	15.0938	18.2473	16.0741	19.1017	20.6535	16.0134	16.7324	16.3019	16.2818
DO472	17.2827	17.7333	18.0999	17.6676	13.9708	18.7863	15.2677	18.4133	16.5005	19.4072	20.8061	16.9319	17.6399	16.8637	15.9533
DO473	16.9722	17.718	17.7684	17.4454	13.5997	18.547	15.3226	18.4488	16.4487	19.2149	20.5553	16.587	17.3013	16.5631	15.5959
DO474	16.7948	17.3257	18.3226	18.2659	13.4422	19.2008	15.4457	18.7949	16.8618	19.6561	21.0078	16.9576	17.8786	17.162	16.9485
DO475	17.0319	17.7165	18.067	17.6545	13.5356	18.8462	15.3311	18.6082	16.7766	19.55	20.9275	16.3301	17.7551	17.1331	16.2788
DO476	17.1114	17.5319	18.3584	18.3209	13.2085	19.3403	15.6994	18.8888	16.9404	19.7208	20.8689	10.6308	18.2875	17.9763	17.1725
DO477	17.0649	17.7528	18.3558	17.8205	13.7783	19.0041	15.3325	18.7327	16.8348	19.5625	20.9695	16.5487	17.9601	17.2518	16.7141
DO478	16.8627	17.6417	18.1493	18.1606	14.219	19.3885	15.7179	18.8119	16.8724	19.7651	20.8971	16.5668	18.0031	17.4011	17.0874
DO479	17.0302	17.5114	18.6804	18.2669	13.3725	18.9614	15.0471	18.7007	16.8322	19.0362	20.9577	16.1357	18.0211	16.8558	17.3154
DO480	14.9805	16.2492	17.9315	17.8114	13.4162	18.6366	14.8162	18.3113	16.0288	18.8541	20.514	15.4425	17.5467	16.4873	16.526
DO481	16.7346	17.2654	18.0108	17.8641	13.3167	18.5674	15.2603	18.2159	15.9956	18.9378	20.5132	15.7258	16.9661	16.3211	16.4801
DO482	16.7915	17.2792	18.064	18.17	13.0481	18.7783	14.8731	18.3536	16.3345	19.1474	20.5866	9.96815	17.8482	17.5017	16.8428
DO483	16.9939	17.5443	18.2638	18.3043	14.318	19.2501	15.7529	18.9182	17.1352	19.5215	20.9473	16.345	17.7674	17.3643	16.8481
DO484	16.0296	16.6137	17.5221	17.2141	13.2604	18.3041	10.4104	18.1098	16.0101	18.6737	20.1298	15.9359	16.4468	15.7775	15.89
DO485	16.1986	16.9259	18.0081	17.9575	14.0297	18.802	15.0876	18.5716	16.5305	19.11	20.5543	16.2091	17.3449	16.795	16.3222
DO486	16.5283	16.8677	17.5738	17.3609	13.5293	18.6135	15.3384	18.5047	16.4856	19.1823	20.4885	16.5218	17.1753	16.5689	15.5877
DO487	15.1343	15.9967	17.3886	17.2275	13.287	18.052	9.59179	17.7973	15.6837	18.3625	20.097	15.9227	16.2475	15.7443	15.7605
DO488	16.9987	17.006	17.7912	17.5671	13.3914	18.419	14.9467	17.9415	15.6961	18.9413	20.5035	16.1647	17.274	16.1452	16.1429
DO489	17.7654	18.2093	18.6173	18.8493	13.6795	19.2687	15.5964	18.932	16.9691	19.7526	21.0826	11.7431	18.4872	18.0614	17.1815
DO490	17.1344	17.2013	18.3694	18.3104	14.0064	19.1997	10.4167	18.8248	16.7452	19.5846	20.8731	16.5428	17.9723	17.3458	16.953
DO491	17.534	17.5019	18.0799	17.8936	13.2576	18.8288	10.0818	18.2894	16.2733	19.2107	20.5644	16.5243	17.6264	17.169	16.8231
DO492	17.1337	17.3623	18.0978	17.5971	13.5615	18.9202	15.2227	18.6339	16.7429	19.526	20.8114	16.4139	17.888	17.0961	16.5235
DO493	17.1137	17.6075	18.4945	18.7368	13.8355	19.6872	15.6334	19.2577	17.1953	19.7397	21.1317	11.5131	18.3044	18.2819	18.0592
DO494	16.7717	17.1317	17.5545	17.7762	13.5329	18.3598	10.2918	18.0761	16.0458	18.8609	20.1694	16.4937	16.4951	15.8857	15.7817
DO495	16.4246	16.8491	17.944	17.7979	13.3786	18.8163	10.3355	18.467	16.3744	19.1645	20.6158	16.4917	17.0697	16.5027	16.5738
DO496	16.0495	16.9003	17.6573	17.3083	13.5656	18.1959	14.3938	17.9659	15.7624	18.5023	20.4075	15.2613	16.5014	15.9431	16.1091
DO497	17.7534	17.6634	17.742	17.7669	13.1006	18.4704	10.1295	18.1988	16.2399	19.0383	20.1308	16.3023	17.3647	17.0403	16.493
DO498	16.5993	17.3751	17.5897	17.6259	13.2286	18.501	10.1695	18.3361	16.0591	19.1001	20.416	16.8228	16.696	16.1569	16.4196
DO499	17.3636	17.6883	18.1991	17.9287	13.553	18.8242	10.2495	18.6183	16.525	19.3793	20.7482	16.7202	17.1094	16.5693	16.6088
DO500	16.7388	17.5066	18.0745	17.9615	13.1847	18.6541	15.0864	18.432	16.3874	19.0803	20.5406	9.53018	17.6629	17.3198	16.5155
DO501	16.4057	17.1371	17.5817	17.4561	13.6799	18.4515	15.2393	18.0738	16.0751	19.0457	20.3275	16.4852	17.2149	16.5045	15.699
DO502	16.97	17.4301	18.2109	17.7774	13.3077	18.7476	15.3382	18.5383	16.4179	19.3323	20.8883	15.9048	17.0214	16.5375	16.5718
DO503	15.9529	16.5398	17.2465	17.3548	13.5297	18.1293	14.7725	17.8983	15.7679	18.5105	20.1235	15.0184	16.7484	15.7745	15.7746
DO504	16.2754	16.7303	17.5238	17.3059	13.3597	18.3672	14.7804	18.2576	15.9903	18.9292	20.3016	15.4435	17.0556	16.0776	16.1739
DO505	17.3236	17.811	18.2947	18.4783	13.6563	19.2423	15.5631	18.9442	17.0048	19.7013	20.8839	11.6653	18.284	17.8744	17.218
DO506	16.5977	17.5648	18.4026	18.3211	13.7181	19.012	15.2677	18.7663	16.701	19.2321	20.7533	16.5049	17.7187	16.758	17.3453
DO507	17.1035	17.3856	18.2683	17.848	13.7712	19.1138	15.2335	18.7873	16.8041	19.4686	20.9755	17.0354	17.8185	17.1257	17.4291
DO508	16.5832	17.23	17.9719	17.6214	13.4789	18.6452	15.3519	18.4684	16.4394	19.258	20.7405	16.7654	17.5884	16.867	16.5484
DO510	17.4565	17.3323	17.5542	17.4068	13.6242	18.3581	14.9635	18.0707	16.1238	18.9438	20.0803	16.4717	17.086	16.4999	15.7782
DO511	15.5512	16.2037	17.4365	17.1049	13.4562	18.4115	14.9837	18.2039	15.9399	18.6668	20.3582	15.8955	16.968	16.1855	15.6642
DO512	16.4957	17.1439	17.8176	17.8019	13.6348	18.7489	15.4241	18.408	16.3831	19.1944	20.7703	16.8918	17.4648	16.94	16.0633
DO513	16.9559	17.8531	18.3614	18.2969	14.3214	19.0435	10.7689	18.8616	16.6936	19.3058	20.7956	11.2817	18.1118	17.6819	17.4656
DO514	16.3109	16.8856	17.8766	17.8461	13.4702	18.7166	8.91855	18.3614	16.2563	18.9214	20.5315	16.5905	17.485	17.1282	17.153
DO515	16.7227	17.5711	18.348	18.036	13.8418	19.2499	15.6043	18.9485	16.961	19.3317	21.06	17.0767	17.8024	17.1627	17.2665
DO516	16.7735	17.2649	18.3023	18.2663	13.7435	18.9416	15.2404	18.6612	16.4454	19.3937	20.8482	16.417	17.7127	16.5495	16.8715
DO517	16.9171	17.5287	17.9951	18.0497	13.4913	18.9279	10.6838	18.6535	16.4869	19.3946	20.7605	16.4465	17.5707	17.117	16.4628
DO518	17.0735	17.5021	17.8443	18.202	13.8312	18.9355	10.2792	18.6989	16.6027	19.4138	20.7039	16.5085	17.6884	17.2671	16.6919
DO519	16.6619	17.1871	18.0907	18.0294	13.2467	18.6896	15.4218	18.5815	16.3708	19.0792	20.7957	16.4575	17.4218	16.5036	16.4136
DO520	16.8289	17.5297	17.8569	18.2811	13.1982	19.1458	10.6796	18.8158	16.7605	19.5499	21.0431	16.6647	17.9742	17.4948	17.2036
DO521	17.1154	17.7921	17.8531	17.7472	13.5253	18.5244	15.3527	18.5847	16.3887	19.0999	20.4648	15.8824	17.1793	16.0044	15.8723
DO522	16.3989	17.3727	18.336	18.3816	13.5098	18.9618	15.1359	18.7398	16.616	19.1761	20.9988	15.992	17.2701	16.8236	17.2132
DO523	16.6939	17.5336	18.4756	18.1772	14.0044	19.0929	15.4132	18.7997	16.7092	19.5776	20.9197	16.2675	18.0782	17.0018	17.1419
DO524	16.2457	16.8706	17.4249	17.3301	13.4403	18.186	10.1678	18.1264	15.9558	18.5366	20.0427	15.8874	16.8991	16.4165	15.9698
DO525	16.3542	17.1418	18.0267	18.0187	13.7635	18.9511	10.4037	18.659	16.6434	19.2954	20.7398	17.0588	17.6308	17.2221	16.898
DO526	16.4889	17.0104	17.7405	17.5934	13.5505	18.8398	15.223	18.537	16.4925	19.4091	20.7716	16.8507	17.7506	16.9697	16.7175
DO527	15.6918	16.5649	17.3233	17.0786	13.8145	18.6504	15.0216	18.3268	16.17	18.9694	20.3803	15.9782	17.255	16.6003	16.0235
DO528	16.8219	17.1237	17.8872	17.4567	13.7787	18.7471	15.4368	18.6153	16.7246	19.4405	20.7285	16.833	17.5769	16.8438	16.132
DO529	16.8421	17.3917	17.821	17.73	13.9621	18.8606	15.2715	18.6333	16.631	19.3429	20.6691	16.7232	17.5456	16.9328	16.22
DO530	16.8517	16.922	17.9027	17.9502	12.6903	18.4988	14.786	18.2866	16.3568	18.9256	20.4878	10.4267	17.59	17.0908	15.9481
DO531	17.0984	17.4639	17.8366	18.0288	12.8876	18.6663	10.2588	18.2414	16.0306	18.8434	20.4149	16.5677	17.3337	16.7163	16.6816
DO532	16.0649	16.7671	17.7392	17.6516	13.2116	18.4709	15.1516	18.0707	16.0228	18.7397	20.641	16.848	17.3742	16.7212	16.0746
DO533	16.7455	17.3407	17.7131	17.7232	13.8113	18.9469	15.6123	18.6235	16.6611	19.5272	20.7039	16.9902	17.5511	17.082	16.2866
DO534	16.9959	17.6022	17.659	17.6342	13.5213	18.8222	15.5329	18.5572	16.451	19.2613	20.6004	16.7226	17.3471	16.7687	15.8171
DO535	16.3067	16.7552	17.3498	17.2971	13.2211	18.0188	14.2066	17.9993	15.8449	18.3505	20.1936	15.0261	16.733	15.7646	15.8534
DO536	17.1507	17.8778	18.3081	18.4924	13.9565	19.1435	15.7563	19.0106	16.974	19.5838	20.9259	17.0662	17.8156	17.1108	16.8088
DO537	15.704	16.6666	17.5514	17.9815	12.8655	18.5698	14.9492	18.3829	16.2207	18.9856	20.306	9.71528	17.6817	17.0792	16.4047
DO538	16.1406	16.8191	17.8704	17.9732	13.9864	18.7298	14.8325	18.7037	16.5374	19.0853	20.724	16.2399	17.4448	17.0216	16.7796
DO539	16.7135	17.303	18	18.1395	13.6971	18.9665	15.3775	18.6451	16.4941	19.3508	20.7503	16.3848	17.4922	16.5258	16.5865
DO540	16.0928	16.6676	17.3158	17.0945	13.5389	18.4702	14.9876	18.1502	16.1466	18.6991	20.2202	15.986	17.0257	16.4635	15.8944
DO541	16.77	17.5489	17.7792	17.5636	13.7008	18.5708	15.061	18.65	16.5445	19.0124	20.5424	16.374	17.3228	16.6088	16.1732
DO542	15.8734	16.4714	17.5353	17.5767	13.7193	18.6153	14.9057	18.2881	15.9746	18.9792	20.4571	15.5528	17.2373	16.285	16.3248
DO543	17.3346	17.6297	17.7083	18.124	13.5814	19.0207	10.8092	18.7023	16.6683	19.1699	20.6238	16.9328	17.4813	17.3039	17.2837
DO544	16.2554	16.7205	17.5461	17.4284	13.1742	18.2696	9.90738	18.1758	15.9718	18.7271	20.3917	16.6336	17.093	16.5769	16.176
DO545	15.8082	16.5817	17.7487	17.528	13.93	18.4797	10.1348	18.5381	16.4117	18.7696	20.4353	16.3115	17.2517	16.6389	16.1617
DO546	17.1113	17.903	18.0061	18.2062	13.8111	19.0957	10.2355	19.0456	17.0184	19.5612	20.8712	16.6686	17.9165	17.4338	16.8541
DO547	17.4261	18.1251	18.5161	18.6496	13.8147	19.2011	15.4586	18.8932	16.9976	19.5102	21.0448	16.1852	17.9856	17.0538	17.2308
DO548	17.1153	17.5041	18.6629	18.662	13.6695	19.2582	15.7822	18.9684	16.9813	19.6906	21.0742	16.2349	18.1954	17.036	17.2618
DO549	15.9943	17.1137	18.269	17.8498	13.7897	18.7291	10.7389	18.5536	16.5981	19.3905	20.5272	9.93345	17.8974	16.8984	16.0356
DO550	16.608	17.4435	17.3938	17.6212	13.9503	18.3798	9.56321	18.1862	16.0264	18.5658	20.0352	15.9773	17.0105	16.5033	16.0502
DO551	16.6961	16.5658	17.6488	17.6536	12.4192	18.6728	15.0552	18.5056	16.5384	19.1814	20.569	11.0811	17.653	17.2301	16.1403
DO552	16.3636	17.1823	17.6574	17.4252	13.5369	18.3777	9.85533	18.4571	16.2227	18.9673	20.5269	16.7942	16.7117	16.1059	16.2909
DO553	16.4827	17.2693	18.0944	17.9843	13.4571	19.0165	15.3889	18.6445	16.5518	19.6766	20.9345	16.1443	17.4017	16.8111	17.0208
DO554	16.6759	17.8078	18.5401	18.2749	13.2669	19.1243	15.5234	18.7702	16.6707	19.6073	20.9696	16.2739	18.1155	17.0388	17.4596
DO555	16.772	17.4641	17.9892	17.8556	13.5919	18.9829	15.4478	18.6799	16.7201	19.5244	20.881	16.478	17.8111	17.1839	16.5809
DO556	16.5955	16.8996	17.7641	17.6529	13.5896	18.3638	14.3645	18.3651	16.1318	18.6522	20.4832	15.4861	17.1593	16.0332	16.3819
DO557	17.5342	17.797	18.1359	18.697	13.1588	19.2094	15.471	18.9178	17.0082	19.4672	20.7723	10.9213	18.2514	17.9325	16.8635
DO558	16.1328	17.1787	17.9565	18.456	12.8062	19.0115	15.147	18.5722	16.6269	19.0463	20.4617	9.67491	17.7281	17.4328	16.8937
DO559	16.7843	16.9626	17.6189	17.5615	13.1778	18.5933	14.8951	18.3786	16.1307	19.1132	20.5247	16.0477	16.6731	16.1634	16.2611
DO560	17.1115	17.4864	17.7261	17.0679	13.5804	18.5403	15.1372	18.4229	16.4087	19.1403	20.6449	16.6638	17.3368	16.5283	15.7405

## Sheet: 2e. heart
DO mouse	mt-Rnr1	mt-Rnr2	mt-Nd1	mt-Nd2	mt-Nd3	mt-Nd4	mt-Nd4l	mt-Nd5	mt-Nd6	mt-Cytb	mt-Co1	mt-Co2	mt-Co3	mt-Atp6	mt-Atp8	Lrpprc
DO021	17.0861	18.4301	19.4833	19.1538	15.1459	20.3015	17.4011	19.6221	17.3516	20.5655	22.2582	16.8284	18.7582	18.2999	18.2018	13.1183
DO022	17.509	17.5568	18.9019	18.5762	14.8394	19.7239	11.3663	19.2101	16.8518	20.143	21.5519	9.96738	18.7843	18.4114	17.1307	12.6476
DO023	18.267	18.0811	18.9857	18.8801	14.5651	19.8178	17.0319	19.3425	17.0778	20.1503	21.847	16.5618	17.811	17.352	17.1962	12.8402
DO024	17.9506	18.6366	19.2945	18.865	14.7535	19.9722	17.1062	19.5284	17.2733	20.0893	22.0343	16.6869	18.2042	17.8846	17.6245	13.201
DO025	17.6866	18.3898	19.8226	19.8978	14.6088	20.4672	17.3087	20.0571	17.8487	20.7679	22.1537	9.98693	19.327	19.3255	17.9526	13.2923
DO026	17.9324	18.5498	19.5353	19.2538	14.9214	20.0307	17.0687	19.4143	17.2384	20.1647	22.1374	16.7885	18.2467	18.0163	17.9235	13.1674
DO027	17.7476	18.4045	19.1378	19.0087	14.5846	20.2267	17.3406	19.6434	17.6422	20.5001	22.0981	16.955	18.6518	18.1136	17.7535	12.8198
DO028	18.3411	18.8997	19.1736	18.7299	14.8485	19.81	17.3266	19.6017	17.593	20.3199	21.9038	16.7817	18.4991	17.6465	16.7872	13.1652
DO030	18.7304	18.5475	19.4161	19.1978	14.9867	20.1189	17.164	19.7702	17.6301	20.1438	21.9226	16.7149	18.8355	17.9526	17.6937	13.0824
DO031	17.6763	18.8203	19.3129	18.9925	14.7848	19.7764	16.9293	19.3552	17.1372	20.0192	21.8513	17.0612	17.8842	17.5383	17.4878	13.102
DO032	18.6745	19.1852	19.5391	19.3202	14.7598	20.3908	17.659	19.9897	17.9183	20.5536	22.2511	16.9771	18.8466	18.3383	17.6149	13.2692
DO033	17.4934	18.1542	19.4585	19.1047	15.0549	20.1241	17.2462	19.3339	16.8362	20.3551	22.2376	16.8754	18.3073	17.9411	17.9095	13.1632
DO034	17.6099	18.3113	19.088	18.642	14.7669	19.6781	17.0624	19.185	17.2177	20.1103	21.8685	16.7628	18.3194	17.5535	17.0904	12.8813
DO035	17.0158	18.3636	18.9123	19.1002	14.8094	19.9139	11.7207	19.2856	16.8347	20.2356	21.9595	16.9422	18.2197	17.6729	17.4918	12.8583
DO036	17.5956	18.0468	19.3447	18.6469	15.1968	19.6117	11.0986	19.4073	16.9959	20.1873	21.6912	9.31014	19.0417	18.4453	17.1836	13.1147
DO037	18.518	18.6085	19.2243	18.7938	14.5721	20.1765	17.3997	19.817	17.763	20.3922	22.1336	17.044	18.7526	18.2452	17.5634	13.1195
DO038	17.3991	18.0712	19.0495	18.3156	15.7459	19.5227	15.7353	18.1316	17.0073	20.203	21.6073	17.0582	18.6249	17.3969	15.8086	13.0761
DO039	17.771	18.4133	19.432	19.2927	14.8766	20.1354	11.845	19.7097	17.3901	20.2987	22.0094	16.9776	18.5646	17.9402	17.5364	13.3476
DO040	17.482	18.7495	19.5187	19.2547	15.3887	20.1382	17.1074	19.713	17.3336	20.2385	22.1065	16.68	18.8177	17.9697	18.0785	13.2839
DO041	17.863	18.3885	19.1964	19.1437	14.8898	19.7467	16.9223	19.3586	17.1221	19.9939	21.7938	16.4604	17.8885	17.6214	17.4744	12.8632
DO042	18.7318	18.8909	19.1351	18.6344	14.4602	19.7747	17.1593	19.3394	17.3038	20.1068	21.9433	16.7454	18.5172	17.8907	17.0951	13.1301
DO043	17.5109	18.8026	19.7318	19.3705	15.1887	20.302	11.8442	19.6083	17.32	20.3792	22.2692	17.4985	18.8315	18.2304	18.1548	13.3521
DO044	17.8274	17.9405	19.3538	19.4731	13.92	20.3292	17.1448	19.917	17.7496	20.4472	21.9319	9.40889	19.194	19.2209	17.7271	13.0825
DO046	18.8892	19.0293	19.6015	19.2947	14.8972	20.1382	17.1556	19.7736	17.4855	20.4088	22.1317	16.861	19.0542	17.9636	18.0258	12.9849
DO047	17.8545	18.2422	19.2348	18.8298	15.2028	20.1278	17.4815	19.7363	17.68	20.4888	22.036	16.8835	18.6777	17.9764	17.3323	13.1861
DO048	18.2159	18.5003	19.8719	19.5387	15.6528	20.6152	17.8392	20.1554	17.8624	20.813	22.5447	16.9518	18.6054	18.2098	18.2421	13.4884
DO049	18.0486	18.4451	19.2129	18.8127	14.9001	19.8105	17.1261	19.3769	17.4582	20.2242	21.8649	16.842	18.3798	17.4732	17.0599	12.727
DO050	17.5223	18.365	19.1729	18.8257	14.7756	20.0483	17.2446	19.4795	17.2384	20.2945	22.1108	17.2569	18.4985	17.9807	17.3898	13.0968
DO051	18.1025	18.0901	19.1714	18.9921	14.9185	19.8629	17.2182	19.4566	17.2389	20.1448	21.8904	16.4541	17.8289	17.3929	17.4579	12.7203
DO052	17.5492	18.1769	19.2069	18.8092	14.5288	19.709	16.9499	19.2338	16.9493	19.9865	21.8028	16.4146	18.5334	17.4342	17.3892	13.0679
DO053	17.362	18.5195	19.3294	19.3027	14.8688	20.2129	11.8078	19.568	17.1444	20.3702	22.1101	16.9075	18.667	18.1166	18.0218	13.1639
DO054	18.6775	19.1807	19.6445	19.6279	15.3029	20.2447	12.173	19.9848	17.7795	20.5057	22.1373	17.7337	18.3517	18.1986	17.8145	13.4905
DO055	17.9057	18.8372	19.5937	19.383	15.5014	20.1515	17.3768	19.5151	17.1502	20.3764	22.1915	16.841	18.8529	17.7909	17.7472	13.1376
DO056	18.6482	18.3324	19.0309	18.8828	13.4982	19.8335	16.7375	19.5481	17.4768	20.1989	21.8227	9.11872	19.0415	18.8385	17.3906	12.8906
DO057	18.4113	18.8621	19.3233	18.9294	15.0494	19.8002	17.0974	19.5753	17.5931	20.22	21.8045	16.7896	18.4555	17.7936	17.3344	13.3243
DO058	17.4	17.7206	19.049	18.645	14.7181	19.5286	16.8035	19.102	16.8123	19.8234	21.698	16.3426	17.6954	17.226	17.1393	12.9035
DO059	16.98	18.3557	19.7552	19.4703	15.1881	20.1699	11.7186	19.5819	17.1309	20.3585	22.2007	17.2245	18.7678	18.2386	18.0204	13.1327
DO060	18.8013	18.8775	19.4164	19.1279	14.9421	20.101	17.3319	19.7915	17.5431	20.3703	22.3172	16.8013	18.7541	17.6997	17.5881	13.5649
DO061	18.8054	19.311	19.8419	20.1131	14.5781	20.6506	17.6082	20.3971	18.0773	20.9254	22.2921	9.63091	19.5715	19.5357	17.9911	13.4996
DO062	17.6298	18.4924	19.283	18.7816	14.9587	19.5949	16.683	19.0879	16.8154	19.84	21.7705	16.5025	18.5235	17.5413	17.5634	12.8753
DO063	16.7761	18.4124	19.4727	19.2423	15.2676	20.0976	17.3059	19.4779	17.1957	20.4145	22.1104	16.7339	18.6018	17.9833	17.8437	13.0626
DO064	17.9886	18.6663	19.5661	19.435	14.5731	20.1877	17.0569	19.8362	17.6953	20.5246	22.1157	9.24674	19.2475	19.1252	17.7108	13.1002
DO065	17.1275	18.0623	19.0062	18.6519	14.8182	19.6898	17.1028	19.0758	16.9179	20.173	21.8224	16.662	18.3331	17.3803	16.9054	12.9017
DO066	17.8408	18.7603	19.7277	19.5388	15.1665	20.3951	11.8981	19.8242	17.5024	20.526	22.2033	17.4241	18.8093	18.1591	17.9832	13.3324
DO067	17.8977	18.9401	20.0037	19.9917	14.9757	20.4867	17.4513	20.3009	18.2374	20.7971	22.216	9.60252	19.4528	19.3744	17.8671	13.2605
DO068	18.1508	18.5839	18.8298	18.6614	14.5035	19.7684	16.9534	19.4248	17.5723	19.9505	21.7087	16.986	18.2198	17.7288	17.1689	12.8284
DO069	17.5482	18.8153	19.6508	19.3667	15.1612	20.4725	17.5922	19.8756	17.6544	20.7753	22.418	17.2211	18.979	18.448	18.1738	13.3782
DO070	17.9846	18.9192	19.5882	19.1841	14.7068	19.9166	11.5704	19.1577	16.7049	20.1864	22.0267	17.5201	17.9169	17.5941	17.837	13.2199
DO071	18.5745	19.2665	19.7752	19.6252	15.2997	20.1781	17.2009	19.4455	17.1342	20.2941	22.0588	17.1472	18.2515	18.0548	18.0424	13.0913
DO072	18.2395	18.6936	19.5174	18.9921	14.7319	20.0423	17.0346	19.6045	17.3643	20.2832	22.2533	16.8287	18.2675	17.9131	17.8794	13.0847
DO073	18.4582	18.4616	19.3834	19.08	14.9167	20.1777	17.2122	19.4271	17.1785	20.2561	22.2688	16.5505	18.9334	17.9864	17.9817	12.909
DO074	18.7031	18.9617	19.035	18.8452	14.9961	20.0904	17.2645	19.3257	17.3514	20.352	22.0968	16.7561	18.4994	17.8261	17.5397	12.9371
DO075	18.0478	18.7102	19.5949	19.3101	15.0557	20.053	17.3816	19.4268	17.022	20.4789	22.2456	17.0639	18.8717	17.6808	17.8096	13.0968
DO076	18.2664	19.383	19.6919	19.2841	15.0403	20.1761	17.1875	19.5525	17.3218	20.2254	22.2496	17.1566	19.0646	18.052	18.0742	13.2881
DO078	17.8783	19.147	19.7518	19.5561	15.2468	20.6055	17.6872	19.9243	17.7726	20.785	22.4308	17.4605	18.9468	18.3808	18.2177	13.3394
DO079	18.2491	18.7093	19.4798	19.4719	14.2263	20.1859	17.0176	19.818	17.7714	20.5695	22.0908	9.54749	19.3203	19.2902	17.7678	13.2147
DO080	17.5392	18.2574	19.2004	18.9546	14.9461	20.241	17.5392	19.604	17.3315	20.5748	22.1905	16.9534	18.6544	18.0182	17.4304	13.0758
DO081	17.6441	18.3145	19.8412	19.619	14.7087	20.465	17.361	19.8162	17.5849	20.5101	22.3573	17.216	18.84	18.0752	18.2392	12.8399
DO082	17.5077	18.1734	19.4641	19.3575	14.9832	20.1601	17.3469	19.4103	16.9405	20.3068	22.0253	16.8429	18.1648	17.9089	17.8875	12.99
DO083	17.758	18.7964	19.7559	19.3351	15.257	20.2282	17.3342	19.4823	16.9936	20.3598	22.2509	17.1453	18.3681	17.9908	18.0712	13.2868
DO084	18.3907	19.3817	19.9356	19.5325	15.2929	20.341	17.478	19.789	17.4972	20.4868	22.3263	17.1244	19.1229	18.1808	18.0783	13.4835
DO085	18.6816	18.8245	19.0861	18.8175	14.5492	19.7623	11.7662	19.4189	17.2222	20.0814	21.8086	17.4544	17.9576	17.6956	17.3038	13.1143
DO086	17.3733	18.0924	19.3907	18.9134	14.9267	19.9327	17.1323	19.3454	17.2347	20.2184	22.0948	17.0398	18.5219	17.8086	17.5681	12.8108
DO087	18.7733	18.9474	19.4188	19.1939	15.342	20.3994	17.7255	20.0485	18.0254	20.7124	22.45	17.4062	19.0231	18.521	17.881	13.3032
DO088	17.6485	18.1945	19.4563	19.3812	15.9269	20.2082	17.4578	19.5144	17.0737	20.4196	21.939	16.3999	18.693	17.6854	17.6765	12.8064
DO089	18.0085	18.7338	19.766	19.4993	15.1647	20.3297	11.918	19.7855	17.5147	20.4414	22.1668	17.5079	18.2928	18.0517	18.0379	13.1063
DO090	18.3419	18.0039	18.8316	18.827	13.6361	19.4867	16.4075	19.1716	17.0201	19.9654	21.6374	9.17244	18.7074	18.2126	16.7215	12.5747
DO091	17.7621	17.9274	19.5581	19.6537	14.228	20.3625	17.2921	19.7464	17.407	20.7906	22.2237	9.42645	19.4103	19.1087	17.7057	12.7619
DO092	18.6536	19.0152	19.6215	19.2798	15.5112	20.0371	17.3548	19.5535	17.2477	20.3451	22.0722	16.6819	18.2592	17.6319	17.7348	13.0242
DO093	18.6415	18.6722	19.4914	19.2837	15.1081	20.1774	17.3917	19.6163	17.3057	20.45	22.1246	16.7094	18.8614	17.8035	17.7569	13.1918
DO094	19.0098	18.9583	19.5831	19.6599	14.3952	20.414	17.2839	20.013	17.9079	20.6351	22.0993	10.1099	19.3933	19.3817	18.0243	13.2455
DO095	17.9326	19.1703	19.7557	19.2796	15.2538	19.9584	17.1057	19.3889	17.1617	20.1577	22.1519	16.8783	18.8334	17.7984	17.672	13.1434
DO096	17.8744	18.7471	19.8368	19.6752	15.074	20.2652	17.2763	19.7091	17.3348	20.5717	22.1154	9.95164	19.2952	19.0583	17.7167	13.1881
DO097	17.5444	18.2238	19.6898	19.1301	15.6047	20.0696	11.6013	19.9623	17.6581	20.5264	22.0162	9.90716	19.3494	18.8429	17.2266	13.5416
DO098	17.4847	18.4348	19.5699	19.2311	14.6465	20.0825	17.0478	19.5341	17.2842	20.19	22.0915	17.0423	18.1813	18.0552	17.9611	12.9218
DO099	18.4884	19.2672	19.4605	19.3217	15.3353	20.1343	11.9704	19.8916	17.658	20.3281	22.0898	17.1325	18.7058	18.1671	17.574	13.5914
DO100	18.4053	18.3167	19.785	19.7054	14.7266	20.5086	17.2541	19.9784	17.8692	20.6603	22.2585	10.4037	19.3888	19.2832	18.2548	12.7405
DO101	18.5342	18.6533	19.4825	19.2416	15.2451	20.2761	17.579	19.7578	17.6396	20.5823	22.2721	16.9612	18.8114	18.1515	17.5149	13.1526
DO102	17.956	18.6639	19.8907	19.6643	15.7336	20.5476	17.8749	20.2551	17.8486	20.7555	22.5189	17.0765	18.4241	17.9877	17.8519	13.0919
DO103	18.006	18.8621	19.4065	19.2002	15.3552	20.0523	17.2298	19.4799	17.086	20.2927	22.1137	16.6632	18.798	17.7932	17.3867	13.4694
DO104	19.3557	19.1496	19.4331	19.5115	14.592	20.0696	17.0805	19.7517	17.8961	20.3402	21.9436	9.86384	19.1942	18.9734	17.7591	13.0389
DO105	18.2618	18.5944	19.3493	19.1602	15.5941	20.015	17.3446	19.6606	17.4211	20.4281	21.9405	16.609	18.0913	17.8699	17.6085	13.2042
DO106	17.989	18.5754	19.425	18.9754	15.0312	20.0381	17.4295	19.4353	17.4313	20.4808	22.137	16.8214	18.64	17.7547	17.1713	13.19
DO107	17.6773	18.6176	19.4847	19.098	14.9481	20.2785	17.3851	19.3659	17.0541	20.5546	22.24	17.1572	18.6456	17.7763	18.0073	13.0286
DO108	18.2048	19.0917	20.0895	19.7643	15.3046	20.64	17.6525	20.096	17.9208	20.6645	22.4693	17.2022	18.6484	18.5525	18.4435	13.3081
DO109	17.992	18.8344	19.8995	19.5141	15.5833	20.5244	17.4414	20.0509	17.8304	20.5813	22.3957	16.9563	19.2537	18.2205	18.2574	13.3394
DO111	18.4139	19.0156	19.8586	19.3758	15.5381	20.4302	17.6871	19.9944	17.9717	20.79	22.4124	17.0148	19.0193	18.3726	18.0471	13.4059
DO112	17.8821	18.999	19.6155	19.2078	15.3149	20.2568	17.5397	19.7762	17.6742	20.7046	22.168	16.9779	18.8795	18.0607	17.3868	13.4674
DO113	17.9927	18.7631	19.6917	19.2727	15.4898	20.3941	17.6076	19.8678	17.7722	20.7329	22.4394	17.3651	18.969	18.2108	17.6171	13.2491
DO114	18.467	18.7972	19.3182	19.0606	14.9769	20.2153	17.5078	19.5517	17.5355	20.5786	22.2955	16.7402	18.8163	17.8642	17.6037	13.0528
DO115	18.1495	18.5986	19.3721	18.8965	14.7748	19.8031	16.8785	18.9337	16.6278	20.2147	22.126	16.8979	18.036	17.3087	17.7273	12.9145
DO116	18.4804	18.8141	19.5575	19.1602	15.3401	20.0585	17.1558	19.3952	17.176	20.1965	22.1136	16.7048	18.8627	17.7507	17.659	13.0349
DO118	17.839	17.7657	19.2039	18.8805	15.4862	20.2616	11.6881	19.4857	17.0089	20.5573	22.0677	9.49742	19.2551	18.9684	17.7722	12.8121
DO119	18.1207	18.3929	19.3835	18.8317	15.111	20.2252	11.7403	19.7294	17.4442	20.6553	22.1804	9.59472	19.3594	18.8831	17.642	13.1382
DO120	17.5592	18.4628	19.4621	19.4241	15.2219	20.482	17.6353	19.9641	17.6619	20.6708	22.5377	17.1762	18.3393	18.1916	18.1133	13.4334
DO121	18.2269	18.524	19.6083	19.1651	15.3322	20.106	17.2583	19.758	17.5829	20.3575	22.0605	16.8438	18.2254	18.0093	17.8563	13.2352
DO122	17.4544	18.4497	19.4911	19.1871	15.1943	20.3649	17.5998	19.8135	17.6285	20.6868	22.1828	17.2361	18.81	18.1966	17.8401	13.216
DO123	18.5507	18.9822	19.5291	19.2469	15.3275	20.4828	17.7043	19.9329	17.8358	20.7523	22.4626	17.1059	19.1246	18.5134	17.8031	13.3395
DO124	18.2405	18.6665	19.4722	18.9131	14.4814	19.8442	16.9495	19.3847	17.3237	20.1742	22.0503	16.9107	18.134	17.5015	17.7385	12.8362
DO125	17.0183	18.1113	19.2889	18.775	14.7867	19.8874	17.2588	19.2286	16.9627	20.3477	22.1499	16.6879	18.5711	17.6024	17.1292	13.1471
DO126	17.3793	18.1903	19.3374	19.0331	14.9687	20.2364	17.5452	19.8383	17.6356	20.6273	22.138	17.2225	18.7272	18.0701	17.3388	13.1055
DO128	18.6993	18.4688	18.9528	19.1457	13.6312	19.7429	16.8137	19.4574	17.3085	20.2106	21.7512	8.97427	18.9654	18.5784	17.0639	12.9025
DO129	18.0728	18.7133	19.5153	19.5828	14.3004	20.1043	16.9846	19.1664	16.7744	20.4616	22.1392	9.6718	19.297	19.0571	17.7217	12.8558
DO130	18.8089	18.7665	19.4341	19.0977	14.9068	20.1586	17.3213	19.8267	17.6283	20.2569	22.0654	17.137	18.7156	18.1344	17.6579	13.2023
DO131	17.4568	18.4794	19.5678	19.2864	14.8961	20.1532	17.314	19.4685	17.1275	20.26	22.1769	16.6567	18.7667	17.6162	17.8086	13.1108
DO132	18.1993	18.4317	19.7187	19.3004	15.6062	20.3377	17.4574	19.9519	17.6762	20.619	22.3658	16.7663	19.1321	18.0458	18.0263	13.1995
DO133	18.6999	18.763	19.7491	19.508	15.9511	20.3378	17.4861	19.9028	17.6238	20.4879	22.3053	17.1504	19.0585	17.9757	17.8707	13.2224
DO137	17.4803	18.147	19.3895	19.3954	14.3685	20.2394	17.1218	19.6463	17.2178	20.5559	21.9254	9.70722	19.1082	19.0069	17.6334	13.3329
DO138	17.7482	18.734	19.8049	19.2508	15.077	20.3987	17.4531	19.9445	17.7791	20.7025	22.3315	17.0668	18.927	18.1759	18.0583	13.1861
DO140	17.6092	18.2103	19.4845	19.1693	14.9702	20.022	17.2859	19.4091	17.1672	20.2555	22.0448	16.6308	18.1525	17.7329	17.8084	13.0418
DO141	18.5053	18.7745	19.3594	19.0311	15.2165	19.9936	17.1649	19.5132	17.269	20.2458	21.9971	16.604	18.0915	17.6616	17.5672	13.2112
DO142	18.1449	18.3141	19.4124	19.2733	15.1447	20.2205	17.4464	19.6739	17.3594	20.4116	22.0857	16.6861	18.2307	17.9161	17.892	13.1529
DO143	19.1991	19.0685	18.9654	19.2495	14.2941	20.0203	16.8824	19.8219	17.8776	20.3389	21.6913	9.69464	19.0461	18.9418	17.6804	13.0254
DO144	18.1694	18.4401	19.1304	19.3222	13.8877	20.1421	17.1117	19.8297	17.7716	20.4811	22.0363	10.3655	19.1701	18.8956	17.5362	13.1101
DO145	17.0053	18.3152	19.4633	19.0836	14.7044	19.9857	11.5511	19.0564	16.5321	20.1983	22.0197	16.7576	18.5888	17.9449	18.0059	12.9469
DO146	17.4609	17.9549	19.1054	18.8688	14.657	19.8414	17.0387	19.3402	17.0661	20.0198	21.8958	16.348	18.5168	17.3892	17.4018	12.8262
DO147	18.5591	18.585	19.503	18.9779	14.8139	19.8855	16.9696	19.4147	17.2254	20.0663	22.0247	16.8347	18.1565	17.7503	17.6913	12.9258
DO148	17.4845	18.3878	19.3906	18.8129	15.3376	20.0923	17.7335	19.7328	17.7132	20.6587	22.1347	16.6987	18.7175	17.7467	17.2346	13.5267
DO149	17.9885	18.3322	19.2759	19.055	15.164	19.878	17.1844	19.449	17.1432	20.1731	21.9928	16.5002	18.6696	17.6019	17.6033	12.6773
DO150	17.2562	17.9649	19.4888	19.3924	15.3539	19.9895	11.8311	19.4245	17.0264	20.3616	22.0048	16.9591	18.513	17.7266	17.5977	12.9799
DO151	18.2802	18.3194	18.9389	18.3965	14.7124	19.5494	17.0426	19.0547	17.0438	19.9617	21.8661	16.9368	18.298	17.2444	16.6267	12.7858
DO152	18.313	19.0264	19.5744	19.4544	15.2382	20.2111	17.3452	19.6725	17.4466	20.292	21.9874	16.779	18.7891	17.9427	17.7041	13.2894
DO153	18.6502	18.8705	19.356	19.1655	15.28	20.1137	17.4569	19.6256	17.3863	20.417	22.1308	16.7397	18.7967	17.6669	17.6068	13.0158
DO154	17.5367	18.1704	19.5312	19.4704	14.8436	20.3026	11.9877	19.8467	17.5271	20.4643	22.1638	17.1261	18.6673	18.0895	17.7701	13.2861
DO155	17.3728	18.2679	19.1371	18.7667	14.7466	19.9823	17.1847	19.2622	17.1171	20.2404	21.8919	17.1262	18.4026	17.8087	17.4617	12.9493
DO156	18.3619	18.5897	19.1972	18.7383	14.2417	19.623	16.7804	19.1699	16.9338	19.818	21.8663	16.588	17.9478	17.6426	17.405	12.9719
DO157	18.0611	19.1358	19.7065	18.9702	15.2073	20.2448	17.4756	19.7892	17.7261	20.5927	22.3778	16.7514	18.9487	17.9111	17.8084	13.0189
DO158	17.0765	18.5363	19.6435	19.2596	15.3284	20.2709	17.5224	19.9207	17.5339	20.7026	22.2262	16.8838	18.8365	18.0953	17.7896	13.2804
DO159	17.8956	18.7825	20.0169	19.5952	15.426	20.4293	17.2671	20.1476	17.8003	20.4134	22.2777	17.0272	18.4979	18.3098	18.1618	13.4279
DO160	18.3338	18.8261	19.341	18.8687	14.8439	20.0724	17.3455	19.6937	17.7108	20.467	22.1216	17.1888	18.7579	18.1765	17.3085	13.2387
DO161	17.2586	18.261	18.9727	18.73	14.9226	19.872	17.225	19.0679	16.8068	20.286	21.9747	16.3972	18.3827	17.4331	16.9247	13.0282
DO162	17.9163	18.3409	19.1846	18.8224	15.2191	20.0447	17.421	19.4317	17.4071	20.4706	21.9891	16.7106	18.6368	17.5912	17.3893	12.8604
DO163	17.6327	18.2626	19.521	19.0392	14.6951	20.0378	17.1947	19.4915	17.1067	20.2754	22.0359	16.7723	18.722	17.7573	17.7429	13.1125
DO164	17.7514	18.9086	19.9187	19.5731	15.2453	20.4277	11.9452	20.0883	17.6134	20.6568	22.4394	17.1619	18.9969	18.3925	18.2686	13.4068
DO165	18.4095	18.6494	19.3531	18.8187	15.0773	20.1665	11.5804	19.86	17.4298	20.488	22.0184	10.0457	19.3905	19.0248	17.9868	13.1863
DO166	17.8988	18.887	19.9833	19.5643	15.346	20.2416	17.4201	19.9208	17.719	20.4552	22.3037	16.8787	19.043	18.236	18.2157	13.3059
DO167	17.6078	18.2612	19.8171	18.998	15.7014	20.18	11.7109	19.8515	17.5224	20.5909	22.1229	10.7776	19.4917	18.9477	17.6577	13.2137
DO168	16.9888	18.2351	19.577	19.5312	14.9023	20.4377	11.8988	19.9658	17.6789	20.4931	22.3199	17.3088	18.8128	18.2574	18.0537	13.1361
DO169	17.6871	19.103	19.5777	19.4119	14.9867	20.4075	17.47	19.9485	17.827	20.4439	22.1583	17.559	18.7449	18.5158	17.9862	13.3969
DO170	17.7987	18.3168	19.4165	19.2015	14.9348	20.0917	17.1598	19.4887	17.3196	20.3688	22.041	16.6276	18.8579	17.9277	18.1093	12.83
DO171	17.7037	18.9699	19.6733	19.2401	15.0748	20.3676	17.5471	20.0026	17.8118	20.6093	22.2152	17.3307	18.764	18.4249	17.7949	13.2964
DO172	17.5917	18.876	19.7437	19.2766	15.2958	20.2676	17.5348	19.7928	17.5534	20.694	22.3296	17.826	18.9407	18.1946	17.6946	13.3684
DO173	19.2563	19.466	20.1265	20.1927	15.1613	20.9982	17.786	20.6721	18.5447	21.2451	22.5784	9.55632	19.8743	19.9558	18.6486	13.4814
DO174	17.7081	18.6491	19.6314	19.3519	15.3652	20.3686	17.6042	19.6687	17.3072	20.4895	22.3969	16.7618	18.3645	17.8534	18.0135	13.1892
DO175	18.1062	18.9944	19.7911	19.4038	15.4246	20.3692	17.6601	19.9212	17.7051	20.8499	22.3706	17.059	18.9031	18.1648	17.6293	13.3768
DO176	18.1958	18.5541	19.5883	19.4931	14.3646	20.1078	17.1554	19.3909	17.0119	20.6095	22.0146	9.44603	19.1769	18.9033	17.4057	13.1918
DO177	18.0938	18.495	19.4012	19.2964	14.0936	20.1189	17.1556	19.6647	17.3689	20.6036	22.0693	9.82717	19.1834	18.9445	17.3827	13.178
DO178	18.0813	18.4561	19.3298	19.059	15.1391	20.3439	17.5851	19.6454	17.4247	20.6474	22.3197	17.2112	18.791	17.9982	17.898	13.1649
DO179	18.6698	18.8731	19.5232	19.4382	14.4143	20.1898	17.0572	19.9881	17.907	20.6024	22.0972	9.82863	19.1814	19.07	17.674	13.1571
DO180	17.4939	18.3437	19.5118	19.1194	14.7802	20.1231	17.2971	19.4282	17.0502	20.3863	22.3115	16.8925	18.893	17.881	17.7858	13.2495
DO181	17.264	18.3277	19.1186	18.8023	15.432	20.0327	17.418	19.0664	16.768	20.4742	22.0573	16.4416	18.5239	17.4177	16.9889	13.0621
DO182	17.2957	18.1238	19.5997	19.2684	15.25	20.324	12.1165	19.6665	17.2844	20.6185	22.1963	17.4469	18.7671	18.0516	17.8476	13.1086
DO183	18.0979	19.1195	19.7026	19.5342	14.8813	20.3014	11.9321	19.6889	17.3715	20.4885	22.1832	18.2257	18.348	18.1867	18.0371	13.2024
DO184	18.5366	19.1936	19.886	19.516	15.5549	20.5963	17.5783	20.2024	17.9286	20.6992	22.5159	17.1131	18.6684	18.5678	18.2452	13.5283
DO185	18.2145	18.9141	19.2996	18.7578	15.0958	19.996	17.3244	19.5502	17.5616	20.4999	22.2959	17.2434	18.7903	17.8073	17.5012	13.1877
DO186	18.0113	18.2401	19.1687	19.3319	14.2592	20.0505	16.9222	19.3362	16.9493	20.4066	21.9811	9.48355	19.1343	18.8873	17.6407	12.8877
DO187	18.4282	19.1408	19.8375	19.2558	14.8569	20.1935	17.2864	19.8812	17.6981	20.3219	22.2219	17.0862	19.0537	18.1486	17.8688	13.5279
DO188	19.2864	19.3534	19.9239	19.5036	15.2569	20.4157	17.5623	20.1656	18.0189	20.6055	22.2224	17.4411	18.9781	18.3358	17.9034	13.3247
DO189	18.8054	19.0511	19.344	19.1198	14.9713	19.9925	11.6923	19.6035	17.5458	20.2659	22.0366	17.3286	18.6851	18.1456	17.5541	13.4454
DO190	17.5204	17.6361	19.113	18.7326	14.9564	19.9837	11.3905	19.0244	16.5288	20.3339	21.9137	9.40854	19.1373	18.7719	17.6447	12.875
DO191	18.5302	19.0674	19.6069	19.3019	14.9834	20.4222	17.525	20.1678	18.0728	20.5648	22.2483	17.3462	18.7663	18.3444	17.7695	13.3969
DO192	17.8095	18.6541	19.3537	19.1936	15.0471	20.4249	17.649	19.7341	17.6472	20.585	22.2978	16.774	18.7591	18.0918	17.7232	13.2732
DO193	18.6883	18.6247	19.3287	18.9251	14.5161	19.933	17.0548	19.4861	17.1806	20.1906	22.0391	16.6892	18.8486	17.7371	17.6452	12.8505
DO194	18.6547	19.0971	19.5714	19.1116	15.2159	19.8967	17.3496	19.4554	17.1908	20.3354	22.0906	16.797	18.7644	17.2026	17.3216	13.2834
DO195	17.0926	18.2962	19.9922	19.4939	15.9968	20.5332	11.8998	20.1036	17.7238	20.7326	22.1996	9.41307	19.5201	19.4695	18.3853	13.4038
DO196	19.529	18.7399	19.5761	19.5402	14.464	20.4105	17.2205	20.0972	18.1068	20.675	22.0754	9.69417	19.3856	19.2967	18.0212	13.0451
DO197	18.5964	18.8694	19.4236	18.9853	15.5911	20.2232	11.6267	19.8084	17.4543	20.6098	22.0149	9.88759	19.3432	18.9404	17.6459	13.2583
DO199	18.3203	18.6229	19.4472	19.1207	14.9715	20.1458	17.2479	19.6929	17.4475	20.3064	22.2331	16.8138	18.2302	17.8989	17.9275	12.9487
DO200	18.3724	19.1177	19.7133	19.5073	15.2279	20.3022	17.4992	19.6976	17.2812	20.6315	22.2925	17.4361	18.4118	18.2714	18.1095	13.188
DO201	17.9536	18.8265	19.6677	19.5462	15.402	20.7126	17.8136	19.9258	17.7668	20.9505	22.5399	17.8339	19.0576	18.5184	18.404	13.1567
DO202	17.4126	18.221	19.4746	19.2103	15.2065	20.3963	17.6035	19.5693	17.2369	20.631	22.3665	16.7441	18.8365	18.2312	17.8661	13.0863
DO203	18.2603	18.852	19.4106	19.5818	14.4448	20.4244	17.1558	19.9344	17.7549	20.6436	22.0563	9.94375	19.2612	19.2948	18.1106	13.0951
DO204	18.4162	19.3726	19.741	19.1595	15.1292	20.0631	17.1999	19.4562	17.2921	20.2259	22.1669	17.0111	18.9376	17.8926	17.698	13.0891
DO205	18.6138	19.4464	19.6832	19.2098	15.3573	20.356	17.7041	19.8584	17.9067	20.8357	22.3672	17.1403	18.9295	18.1766	17.7898	13.4589
DO206	18.8442	18.7825	19.4308	19.0643	15.3103	20.2774	11.6865	19.7762	17.4825	20.5914	22.0385	9.54714	19.4488	19.2154	18.0292	13.1516
DO207	17.9426	18.1299	19.491	18.8995	15.2589	20.1889	11.8247	19.3141	16.8679	20.5726	22.014	9.45004	19.3395	18.9388	17.806	13.0235
DO208	17.9851	18.3814	19.665	19.1089	15.1593	20.2035	11.7382	19.6269	17.2317	20.6203	22.1681	10.31	19.4145	19.1892	18.0423	13.2652
DO209	18.5301	19.204	19.6408	19.1764	15.7107	20.1731	17.5811	19.8002	17.8616	20.5755	22.2066	16.8103	18.7669	18.1042	17.5595	13.3566
DO210	18.0584	19.2459	19.6607	19.3841	14.8969	20.3878	17.5419	19.782	17.73	20.5034	22.2429	16.9827	18.8311	18.4171	18.0244	13.3496
DO211	18.1815	18.9226	19.8641	19.5114	15.6981	20.2407	17.5395	19.5047	17.1821	20.5214	22.4274	16.7544	18.3694	17.8747	17.8995	13.3662
DO212	17.8781	18.7012	19.6152	19.4216	15.1196	20.1775	17.3787	19.6162	17.3127	20.3451	22.1653	16.5763	18.8554	17.8695	17.8067	13.3108
DO213	17.2446	18.5496	19.6252	19.2831	15.2303	20.2533	17.6976	19.8244	17.4664	20.6835	22.2185	17.0113	18.7306	17.8998	17.4225	13.4946
DO214	19.0969	19.6643	19.7978	19.4865	15.1644	20.6047	17.673	20.0987	18.0756	20.6352	22.4746	17.7446	19.0546	18.7551	18.3414	13.3469
DO215	17.814	18.7584	19.4798	19.1146	15.0569	20.1492	17.3149	19.5078	17.3488	20.4274	22.2979	17.4278	18.7364	17.9669	17.9944	12.8295
DO216	19.5399	19.5346	19.6671	19.5041	15.3277	20.5868	17.7395	19.9945	18.0547	20.6677	22.4602	17.4955	19.0144	18.4074	18.2755	13.0609
DO217	18.0742	18.6332	19.4901	19.3418	15.4341	20.2234	11.9915	19.7853	17.5264	20.4846	22.1613	16.8842	18.7102	17.9858	17.7604	13.166
DO218	18.9248	18.8663	19.255	18.8426	14.6135	19.8291	11.6209	19.4383	17.297	20.2033	21.9743	17.0881	18.6554	17.7947	17.5521	12.8531
DO219	17.8735	19.0461	20.0081	19.5617	15.2902	20.3956	17.5124	19.7582	17.4054	20.5718	22.3806	17.7797	19.0304	18.5445	18.2022	13.3355
DO220	18.2644	18.8746	19.5004	19.2703	15.8673	20.4005	11.9658	19.9246	17.5966	20.7658	22.28	10.1126	19.3894	19.1124	18.0047	13.2629
DO221	17.8212	18.3216	19.5889	19.3821	14.8039	20.148	11.6669	19.6356	17.2882	20.3599	22.146	17.112	18.733	18.1154	17.9229	13.0519
DO222	17.9947	18.754	19.7785	19.559	15.2034	20.3399	17.3705	20.1189	17.9122	20.4289	22.1647	17.4811	18.809	18.6301	18.1015	13.3005
DO223	17.142	18.4228	19.5453	19.2816	15.5864	20.0233	17.3756	19.4194	16.9497	20.2568	22.1302	16.583	18.0678	17.5159	17.6131	13.0647
DO224	17.2973	17.9208	19.3083	18.9579	15.1474	20.1899	17.4037	19.3419	17.0897	20.442	22.2806	16.7096	18.7349	17.967	17.6948	12.8707
DO225	17.9856	18.615	19.3254	19.0285	14.9655	19.8263	16.9568	19.55	17.3661	20.0659	21.8964	16.6608	18.7515	17.6565	17.4104	12.9437
DO226	17.5884	18.0328	19.3991	18.7814	15.1789	20.1274	11.5961	19.9153	17.4847	20.5095	21.9388	9.42455	19.3336	18.9701	17.6138	13.2292
DO227	17.6563	18.4006	19.7271	19.4285	14.7163	20.2585	11.8645	19.7507	17.5215	20.3355	22.15	17.3628	18.8099	18.339	17.9552	13.137
DO228	17.8881	18.2127	19.2143	18.8435	14.4128	19.8683	16.9574	19.278	17.0776	20.0305	22.0026	16.5363	18.5731	17.5336	17.6777	12.9281
DO229	17.2068	18.2141	19.5146	19.0298	14.6889	20.0852	17.5342	19.65	17.4075	20.5283	22.0684	16.6913	18.6504	17.7888	17.2117	12.9411
DO230	17.7281	18.6033	19.418	19.3336	15.0054	20.0279	11.7497	19.6697	17.4217	20.2033	22.0069	16.9092	18.6157	18.1138	17.7036	13.325
DO231	17.3339	18.1537	19.5539	19.3433	14.5716	20.2148	17.1823	19.8964	17.622	20.6496	22.1619	9.40095	19.262	19.023	17.6131	13.3838
DO232	17.8528	18.3445	19.5066	19.3849	14.9751	20.2236	17.3163	19.7054	17.4504	20.4473	22.1105	16.7639	18.2867	18.0282	17.9934	13.1894
DO233	17.2853	18.1765	19.4028	18.8162	14.8246	19.6824	11.5479	19.1421	16.6447	19.9891	22.0403	16.8494	18.5034	17.6085	17.314	13.0629
DO234	17.6611	18.2007	19.3691	19.2046	14.9633	20.1321	17.3019	19.4937	17.0514	20.3573	22.0386	16.6694	18.8046	17.7819	17.7695	13.1308
DO235	17.7471	18.3654	19.3178	18.9743	14.88	19.8287	11.701	19.1142	16.5991	20.1604	21.9362	16.8424	18.4611	17.5596	17.4104	13.2346
DO236	18.764	18.6397	19.5609	19.1147	15.0316	20.01	17.2131	19.6662	17.499	20.2319	22.0939	17.1952	18.7439	18.1739	17.7289	13.3119
DO237	18.1841	18.4985	19.1161	18.7724	14.9972	19.7148	17.281	19.1307	17.171	20.3158	21.9404	16.7659	18.3826	17.2976	16.7811	12.8961
DO238	17.9113	18.5985	19.4876	19.1429	15.4696	20.1983	17.6263	19.7179	17.7286	20.6458	22.1345	16.8662	18.7211	17.8629	17.1095	13.2573
DO239	17.9141	18.2864	18.8442	18.2089	14.2535	19.5648	17.0141	19.2765	17.3492	20.0394	21.9162	16.5827	18.3023	17.5354	16.7662	12.8655
DO240	18.8869	18.7158	19.4682	19.3678	15.2434	20.1577	17.4916	19.5468	17.3182	20.3648	22.0924	16.8384	18.1885	17.8213	17.6602	13.0559
DO241	17.6344	18.4392	19.7904	19.9269	14.3207	20.5872	17.5889	19.8208	17.4545	20.765	22.3664	9.79019	19.6263	19.5179	18.1749	13.0713
DO242	18.3866	18.3594	18.9627	18.8762	13.9606	19.785	16.7051	19.3952	17.3264	20.1121	21.8229	10.0002	18.9112	18.5731	17.5033	12.7186
DO243	17.1391	18.6396	19.5768	19.0061	15.4508	20.1748	17.3818	19.5926	17.2123	20.6585	22.1658	16.7518	18.7853	18.1164	17.7522	13.4584
DO244	17.5556	18.6258	19.4435	18.9466	15.1319	20.1646	17.4653	19.3786	17.0851	20.5205	22.2381	16.7329	18.7634	17.8631	17.6483	13.2951
DO245	18.2282	18.6115	19.2841	18.8442	14.5613	19.8319	17.1024	19.3711	17.1871	20.1044	21.7562	16.6431	18.6319	17.6456	17.3458	13.0016
DO246	18.5389	18.7963	19.2407	18.693	14.9031	19.9618	17.0282	19.6205	17.6104	20.2936	22.1206	17.133	18.7276	18.0886	17.3492	13.2101
DO247	18.1438	19.4056	19.97	19.8163	15.4411	20.6377	12.152	20.1919	17.9411	20.7679	22.4117	17.5981	19.0058	18.6384	18.5675	13.4743
DO248	18.2059	18.5942	19.1896	19.042	14.9647	19.8036	11.6158	19.3878	17.1708	20.0377	21.7981	16.8413	18.4351	17.8249	17.4875	12.8525
DO249	18.2996	18.1626	18.967	18.5488	14.8966	19.9373	17.3401	19.5248	17.452	20.3829	22.0113	16.8936	18.5455	17.544	16.9022	13.0068
DO250	18.4405	18.9973	19.404	18.9469	14.9674	20.1596	17.4326	19.9039	17.886	20.6633	22.1874	17.1801	18.7551	18.0359	17.529	13.36
DO251	18.9526	18.8425	19.9842	19.9389	15.1252	20.7483	17.6726	20.4209	18.2913	21.0456	22.4463	9.86705	19.7241	19.5859	18.1951	13.1153
DO252	17.82	19.0331	20.0404	19.7763	15.2818	20.5998	17.5411	20.1012	17.9168	20.6694	22.4544	17.617	18.5942	18.3848	18.4691	13.2005
DO253	17.8998	18.3921	19.0435	18.7021	14.7042	19.9137	17.3952	19.5928	17.5437	20.3392	21.9942	16.5877	18.4759	17.6759	16.784	13.05
DO254	17.4519	18.236	19.2285	18.8965	14.6945	20.0674	17.1946	19.4151	17.2856	20.3856	22.1259	17.2723	18.6475	18.0222	17.8064	12.9094
DO255	17.4841	18.661	19.5378	19.3252	15.0248	20.2219	17.4201	19.4826	17.1393	20.4549	22.1869	17.0819	18.9361	17.9057	17.9908	13.1274
DO256	17.57	17.6734	19.5034	18.9129	15.2826	20.054	11.4746	19.63	17.209	20.5538	21.8976	10.0112	19.3416	18.7471	17.2314	13.3265
DO257	17.5896	17.7012	19.0377	19.1004	13.8886	19.9436	16.8105	19.4158	17.223	20.2048	21.8935	9.0527	19.0038	18.7545	17.4199	12.7262
DO258	17.6244	18.5927	19.5469	19.3019	15.0102	20.1641	17.3353	19.4015	17.3634	20.4008	22.2175	17.099	18.6941	18.2699	17.9414	13.0752
DO259	17.7231	18.9926	19.8848	19.5302	14.6776	20.2237	17.2514	19.9446	17.7183	20.7558	22.3244	10.0034	19.3573	19.1852	17.8287	13.4298
DO260	17.6714	18.5246	19.8947	19.3374	15.4481	20.4809	11.9257	19.9516	17.6569	20.7361	22.2304	9.79522	19.4832	19.0909	18.0581	13.2265
DO261	18.4503	19.0338	19.4141	19.2523	15.2612	20.0168	17.2005	19.6143	17.4713	20.2168	21.8255	17.0179	18.8076	18.0959	17.6598	13.1893
DO262	16.981	18.6622	19.7199	19.6106	15.0694	20.3718	17.4049	19.8811	17.6525	20.5018	22.2266	17.3375	18.382	18.3465	18.1893	13.3348
DO263	17.4729	18.3378	19.5089	19.2306	15.2307	20.2518	17.517	19.7482	17.381	20.4917	22.2127	16.8602	18.9276	18.0489	17.8544	13.1954
DO264	18.3575	19.1165	19.5758	19.1438	15.0644	20.0425	17.1854	19.6603	17.4392	20.1971	22.0432	17.1624	18.2535	17.928	17.6762	13.4043
DO265	17.3673	18.1494	19.054	18.686	14.9914	19.8356	17.2628	19.4388	17.2391	20.384	21.954	16.6912	18.5034	17.5009	16.8005	13.0877
DO266	18.1625	18.7652	19.623	19.3002	15.0576	20.0626	17.3206	19.7449	17.4913	20.2788	21.98	16.8232	18.7351	17.9148	17.4315	13.3183
DO267	17.9934	18.3404	19.126	19.3119	14.1727	19.9898	17.0239	19.3967	16.9977	20.506	21.9258	9.28941	19.0821	18.6705	17.3166	12.9238
DO268	18.0851	18.4239	19.1988	19.0194	15.033	19.9185	17.1617	19.4837	17.2171	20.1569	22.0978	16.8291	18.1282	17.6094	17.4347	13.0813
DO269	19.5163	18.8961	19.433	18.7404	15.3526	20.3047	11.8817	19.8849	17.6943	20.5176	22.2084	9.72474	19.2804	18.8079	17.9434	13.1401
DO270	17.2424	18.1595	19.6536	19.6619	14.6747	20.4106	17.32	19.7091	17.5922	20.4212	22.2015	17.4193	18.8094	18.4143	18.3242	12.616
DO271	17.4386	18.6043	19.9585	19.5291	15.0466	20.4513	17.4646	20.0993	17.8492	20.5819	22.3471	17.1471	18.9028	18.3418	18.2381	13.3939
DO272	17.972	18.8239	19.5203	19.2385	15.3456	20.3756	17.7493	19.9379	17.7247	20.8477	22.3467	17.0564	18.8238	18.2823	17.6823	13.3326
DO273	19.408	19.5626	19.9899	19.5906	14.9731	20.4056	17.3285	20.1818	18.1435	20.6938	22.3671	10.1532	19.4397	19.263	17.9164	13.3694
DO274	17.4128	18.2459	19.557	19.3672	15.0217	20.2336	11.8661	19.5325	16.923	20.4762	22.1529	17.3561	18.1614	17.7851	18.0211	13.3224
DO275	17.9405	19.0128	20.0367	19.796	15.0181	20.4063	17.454	19.8218	17.6439	20.3814	22.3991	17.3902	18.4819	18.5847	18.4523	13.3599
DO276	18.51	19.0518	19.824	19.3266	15.4509	20.1061	17.3951	19.9372	17.6569	20.3478	22.2052	16.9691	18.9325	17.7838	17.5136	13.4431
DO277	18.2581	18.6065	19.4342	18.9299	15.0177	19.9876	17.0755	19.5589	17.3382	20.1508	22.0754	16.9208	18.2295	17.9346	17.6204	13.1576
DO278	17.7677	18.6925	19.6607	19.3261	15.3099	20.0845	17.3652	19.5991	17.2744	20.3426	22.1982	16.5787	18.1693	17.7923	17.7822	13.4583
DO279	17.819	18.6098	19.2988	19.0387	15.5113	19.9053	12.1943	19.2299	17.0558	20.1855	21.7628	17.3418	17.8482	17.4602	17.4326	12.9925
DO280	18.526	17.9388	18.9101	18.4101	15.0753	19.7205	11.2311	19.183	17.107	20.1233	21.6464	9.3001	18.9382	18.5579	17.2527	12.7935
DO281	18.1608	18.5662	19.5279	19.1962	15.6228	20.1289	17.2993	19.5955	17.3307	20.3092	22.1373	16.7508	18.2181	17.8987	17.7307	13.1264
DO282	18.6456	19.0771	19.4533	19.0386	15.0986	20.0796	17.2328	19.655	17.5203	20.3446	22.1114	16.8795	18.6894	17.8337	17.4607	13.0311
DO283	19.051	18.6693	19.4636	19.2325	14.7734	20.1137	11.7718	19.4229	17.2801	20.2898	22.0219	16.9633	18.7546	18.0395	17.8973	13.1527
DO284	17.8366	18.525	19.1932	18.7981	15.4966	20.0658	17.4275	19.4415	17.3474	20.5597	22.0556	16.6669	18.5387	17.6453	17.1386	13.0483
DO285	18.3381	18.9571	19.7539	19.3633	15.5377	20.2384	17.3777	19.5753	17.2404	20.4616	22.3006	16.9505	18.3759	17.9771	18.1557	13.3525
DO286	17.2553	18.0825	19.4976	19.1731	14.4262	19.9086	17.0595	19.079	16.7844	20.1248	22.0074	17.0271	18.5102	17.7654	17.8365	12.8149
DO287	18.6638	19.5178	19.8977	19.6158	15.5538	20.1254	17.065	19.5296	17.3467	20.2415	22.1843	17.5674	19.0316	18.2542	18.1095	13.2638
DO288	18.9227	19.0163	19.3599	18.9769	14.8097	20.0982	17.3039	19.7281	17.7903	20.442	22.0349	17.3455	18.6792	18.0613	17.4098	13.1646
DO289	18.3603	18.929	19.2034	18.927	14.674	20.2158	17.4164	19.7075	17.6799	20.3864	22.1145	16.9091	18.7421	18.2709	17.6361	13.1395
DO290	17.9372	18.6229	19.4857	19.125	15.3937	20.3596	17.6792	19.9923	17.9036	20.7549	22.427	17.3167	18.9467	18.2823	17.732	13.2608
DO291	18.3154	19.2779	20.3022	19.9995	15.6459	20.8322	17.9564	20.3104	18.0154	20.8643	22.655	17.7266	18.7497	18.6184	18.5587	13.2823
DO292	19.3782	19.2656	19.8888	19.8379	14.8636	20.5538	17.511	20.0411	17.9045	20.7809	22.2281	9.89415	19.5151	19.3531	17.9732	13.2853
DO293	18.0337	18.0586	19.1954	18.451	14.9834	19.7693	11.4758	19.6073	17.1985	20.3486	21.9589	9.60968	19.1428	18.6299	17.0876	13.2587
DO294	18.4514	18.9462	19.5873	19.2856	15.4822	20.136	17.2107	19.5274	17.3843	20.232	22.1578	17.3123	18.3055	17.8472	18.0069	12.9814
DO295	19.153	19.3668	19.4161	18.8977	14.4102	20.0652	17.0652	19.6752	17.7798	20.2391	22.0759	17.3397	18.5803	18.0268	17.7649	12.9901
DO296	18.6251	18.6885	19.0477	18.8406	15.0431	20.0089	17.378	19.4961	17.4841	20.4692	22.0551	16.6221	18.5476	17.6305	17.0325	13.1209
DO297	17.5777	18.3535	19.5679	19.0707	15.1322	20.0989	17.2696	19.3896	16.9368	20.3141	22.2452	17.0277	18.7875	18.1203	17.867	13.1606
DO298	17.613	18.5917	19.4172	19.1188	14.8518	19.901	17.1365	19.4124	17.1243	20.2484	21.997	16.8239	18.7723	17.8462	17.7283	13.0871
DO299	17.8401	18.9029	19.9561	19.7424	15.747	20.5624	17.579	19.982	17.6258	20.5991	22.3563	17.6024	18.4449	18.5048	18.1028	13.237
DO300	18.9902	19.5717	20.1881	19.8248	15.4472	20.4751	12.1026	20.0964	17.97	20.8901	22.5563	18.2116	18.539	18.466	18.3502	13.4677
DO301	17.7711	18.1503	18.9146	18.6249	14.5342	19.6907	16.9353	19.2338	17.0126	20.0262	21.8503	16.5371	18.4573	17.5365	17.2678	13.0489
DO302	18.0757	18.6865	19.4747	19.4555	14.3423	20.1576	17.0207	19.6551	17.5922	20.4532	22.0112	9.8055	19.1986	19.1621	17.8081	13.2183
DO303	17.4873	18.2363	19.9099	19.7615	14.6988	20.5886	17.4174	20.1056	17.7441	20.7691	22.3631	9.90124	19.5147	19.4407	18.1922	13.3247
DO304	18.4995	18.402	19.4316	19.0125	14.6405	19.8869	11.9035	19.3947	17.2519	20.2356	22.0836	17.4435	18.0978	17.5866	17.4972	12.8169
DO305	18.7857	18.5678	19.1805	18.8855	14.5827	19.6484	16.8674	19.1953	16.9826	19.8348	21.8578	16.6054	17.9458	17.4511	17.5365	12.82
DO306	18.0178	18.3353	19.4269	18.9601	14.8643	20.154	17.3335	19.5573	17.1719	20.444	22.3188	16.925	18.3619	17.8569	17.9132	13.2937
DO307	17.7855	18.986	19.8392	19.5069	15.2044	20.3826	17.4742	19.6862	17.2081	20.5395	22.3271	17.0236	19.0844	17.9568	18.1454	13.3195
DO308	18.1163	18.7478	19.6231	18.9266	15.5602	20.0502	11.4285	19.7595	17.3792	20.5475	22.0389	9.7566	19.3865	18.9098	17.4625	13.4911
DO310	18.212	18.9199	19.7199	19.8477	14.5062	20.6693	17.385	19.948	17.8365	20.8107	22.2895	10.1008	19.4887	19.5193	18.4364	13.1215
DO309	18.8421	19.0229	19.8106	19.5747	15.2043	20.5043	17.4868	19.8074	17.5799	20.4879	22.4435	16.8915	19.1947	18.4387	18.275	13.1949
DO311	18.467	18.5983	19.5213	19.1246	14.931	20.1452	11.9037	19.7529	17.5363	20.4533	22.2617	17.1703	18.7909	18.0357	17.6752	13.1593
DO312	18.0336	18.4609	19.2642	18.7488	14.9042	19.7651	17.0104	19.5962	17.2168	20.1131	21.9237	16.4023	17.9617	17.4745	17.1587	13.0357
DO313	18.777	19.0158	19.5199	19.197	14.8063	20.1556	11.8469	19.6525	17.5209	20.2857	22.0658	17.4452	18.7211	18.1133	17.8111	13.0775
DO314	18.3683	18.9182	19.4922	19.1766	15.0511	20.1663	12.019	19.8151	17.454	20.3896	22.3392	16.7676	18.6824	17.9178	17.6561	13.3001
DO315	17.8001	18.4029	19.722	19.4185	15.3992	20.4289	17.389	19.5011	17.1847	20.635	22.3834	17.3918	19.1311	18.1426	18.4202	12.7354
DO316	18.2416	18.7361	19.2384	18.879	15.1235	20.2152	17.3351	19.5104	17.3762	20.4661	22.3336	16.9843	18.832	18.1944	17.7294	12.9341
DO317	17.6188	18.5366	19.4791	19.0253	15.2351	20.3574	17.654	19.7118	17.5825	20.8129	22.3589	16.9239	18.9174	18.0222	17.474	13.2993
DO318	18.0036	18.6919	19.433	19.1759	15.1548	20.2107	17.3253	19.4922	17.2915	20.3403	21.949	17.0131	18.8278	17.9681	17.522	13.1875
DO319	17.891	18.6866	19.6088	19.5893	14.6388	20.3378	17.1601	19.8256	17.5416	20.7003	22.1932	9.97157	19.3884	19.1907	17.7008	13.1679
DO320	18.2691	18.8155	19.321	18.9256	14.8897	19.9702	17.1175	19.5942	17.4338	20.1654	21.9542	16.7673	18.6484	17.6281	17.4293	13.1976
DO321	18.4893	19.176	19.8718	19.7934	15.0845	20.4951	17.2464	20.3005	18.1176	20.7658	22.1563	10.1121	19.3845	19.2347	17.7848	13.3816
DO322	18.4497	18.4865	19.4915	18.9589	14.8979	20.0337	17.091	19.694	17.4086	20.3348	22.0172	16.8431	18.1375	17.7913	17.6489	13.0095
DO323	17.9007	18.3998	19.354	19.2121	14.9338	20.1638	11.9866	19.7728	17.5192	20.4927	22.0263	17.5264	18.1247	17.869	17.5364	13.0564
DO324	18.2858	19.087	19.757	19.3776	15.4695	20.4405	17.5738	20.059	17.8138	20.5827	22.3201	17.3623	19.0435	18.4096	18.043	13.4007
DO325	17.5841	18.453	19.7893	19.6552	14.6585	20.3416	17.2259	19.8132	17.4924	20.6299	22.2112	10.1115	19.4236	19.3324	17.8325	12.8431
DO326	17.1716	18.2865	19.6372	19.0918	15.0393	20.1851	17.3293	19.5591	17.1578	20.4464	22.1311	16.8801	18.8879	17.6596	17.7486	13.1817
DO327	18.2941	19.0558	19.6335	19.2188	15.4935	20.3982	17.6672	19.7919	17.7972	20.7173	22.3821	17.531	19.0215	18.2829	17.774	13.3658
DO328	18.0245	19.1059	19.4583	19.1644	15.2843	20.1587	17.3815	19.6223	17.6303	20.5164	22.0744	17.2047	18.6914	18.1582	17.689	13.3059
DO329	17.5863	18.3121	19.5685	19.1843	15.1193	20.1862	11.8356	19.6577	17.4038	20.3073	22.0931	17.1082	18.6859	17.9599	17.7631	13.0369
DO330	18.3032	18.1293	19.0921	18.9584	14.7884	19.9193	17.0556	19.1642	16.9415	20.1054	21.8298	16.7196	18.5354	17.524	17.5348	12.8374
DO331	17.3509	18.3862	19.7152	19.542	14.8865	20.4343	17.4508	19.5436	17.1009	20.4767	22.3528	17.2955	18.4241	18.0595	18.203	12.8503
DO332	17.3711	18.02	18.7819	18.3315	14.5211	19.7463	17.0777	19.3452	17.1419	20.2011	21.7461	16.6034	18.2179	17.4559	16.407	12.925
DO333	17.9702	18.6307	19.251	19.0807	14.6319	19.9823	11.6748	19.5782	17.3331	20.1068	21.7794	17.5694	18.0004	17.8435	17.307	13.2128
DO335	17.6926	17.9425	19.4551	19.0229	15.6646	20.2799	11.8652	19.9895	17.5942	20.6787	21.991	10.5291	19.343	19.0669	17.6763	13.257
DO336	18.7016	19.2734	19.736	19.2091	15.2251	19.9711	17.1902	19.5386	17.3116	20.2751	22.1089	17.0741	18.83	17.8839	17.6362	13.4142
DO337	17.6373	19.0119	19.7968	19.5427	15.1036	20.3736	17.5737	19.7741	17.3315	20.6207	22.2769	16.9775	19.011	18.3432	18.1928	13.4238
DO338	18.5753	18.7789	19.3427	18.8892	14.9036	19.8604	17.0165	19.4957	17.2002	20.2225	21.9915	16.7777	17.9718	17.6263	17.4376	12.9195
DO339	17.4173	17.9869	19.3181	19.0133	14.5292	20.0257	11.6276	19.6327	17.3579	20.1739	21.849	17.2327	18.5771	18.0634	17.4096	13.3088
DO340	19.217	19.163	19.6263	19.331	15.3841	20.2126	17.1931	19.8579	17.7667	20.2493	22.1066	17.285	18.3894	18.222	17.7841	13.3258
DO342	18.3518	19.1196	19.8269	19.5324	15.6595	20.3821	17.523	20.1072	17.7418	20.664	22.212	16.7271	18.4881	18.1481	17.8816	13.4565
DO343	17.7397	18.2854	19.4434	18.9256	14.9921	20.2942	17.5971	19.7884	17.6814	20.7199	22.3246	17.0734	18.8498	17.9892	17.4165	13.2486
DO344	18.6418	18.6982	19.194	18.7692	15.5358	20.1648	11.5853	19.7099	17.338	20.4433	21.9477	10.1735	19.2182	18.9375	17.7389	13.0273
DO345	17.4028	18.929	19.8846	19.3951	15.6669	20.5007	17.7621	20.0837	17.7227	20.8816	22.5211	17.3454	19.0061	18.4947	17.7043	13.447
DO346	18.1753	18.4585	19.2083	18.7777	14.7418	20.0008	17.3168	19.5035	17.4571	20.3847	21.8945	17.103	18.5486	17.8015	16.9376	12.9667
DO347	17.6864	18.3189	19.45	19.428	14.1491	20.203	17.0511	19.8258	17.6898	20.5136	22.0534	9.61671	19.2768	19.168	17.6166	13.0442
DO348	17.9865	18.0044	19.2462	18.8519	14.718	20.0768	17.0244	19.6876	17.3824	20.082	22.0989	16.7406	18.7119	17.7814	17.5755	13.0287
DO349	17.5942	18.7989	19.584	19.5177	15.2094	20.3624	12.0119	20.0229	17.8077	20.4445	22.0245	16.9944	18.7061	18.2559	17.8845	13.2502
DO350	17.0058	18.7978	19.6114	19.3056	15.1671	20.2538	17.2491	19.8911	17.542	20.4024	22.1241	17.2191	18.2928	18.311	17.977	13.1464
DO352	18.3592	18.7421	19.303	18.7539	15.159	20.059	17.3141	19.5398	17.5554	20.477	22.1571	16.8524	18.7542	17.8172	17.3475	13.1652
DO353	17.5285	18.2017	19.6311	19.5929	14.9735	20.3861	11.9961	20.0341	17.7695	20.4124	22.1631	17.1879	18.7866	18.3695	17.8149	13.1208
DO354	18.4143	19.401	19.7864	19.6667	15.0379	20.606	17.3697	20.3584	18.2272	20.9468	22.367	10.5044	19.6295	19.6574	18.1115	13.5246
DO355	18.2802	18.56	19.1901	18.7773	14.8026	19.7207	16.9439	19.2591	16.968	20.1601	21.9316	16.4902	17.8256	17.2943	17.1653	12.9555
DO356	19.078	19	19.7063	19.736	14.8794	20.441	17.2134	19.9794	17.7956	20.7181	22.1878	10.2061	19.4799	19.3245	18.0372	13.0566
DO357	17.9874	18.0433	19.0338	18.7312	14.4932	19.885	16.9698	19.2827	16.9842	20.0069	21.8303	16.9519	17.8312	17.6706	17.2728	12.8273
DO358	17.2384	17.9378	19.3336	19.0792	15.0589	20.264	17.3964	19.4294	17.0355	20.49	22.1409	17.2166	18.6521	18.2972	17.8145	12.9593
DO359	17.8174	18.8157	19.7511	19.4999	15.276	20.4758	17.3614	19.9317	17.8076	20.5018	22.1697	17.4256	18.4829	18.2736	18.1204	13.118
DO360	18.2096	18.4236	19.2385	19.0613	14.9858	20.3966	17.5552	19.7771	17.7205	20.597	22.124	17.3283	18.8262	18.3471	17.9093	13.0868
DO361	17.9267	18.4439	19.2172	18.8507	14.8178	19.8839	11.7497	19.6115	17.2514	20.1034	22.1065	16.8168	18.6588	17.8371	17.3172	13.3121
DO362	17.947	17.983	19.1153	18.7863	14.931	20.1021	17.3333	19.5691	17.5331	20.3899	22.0116	17.0895	18.6231	17.9087	17.2217	12.901
DO363	17.9835	18.8329	19.6945	19.7157	14.937	20.4083	17.296	19.8516	17.5234	20.7855	22.2405	9.72765	19.4906	19.3988	17.8918	13.1712
DO364	18.0314	18.6835	19.1955	18.8103	15.1952	20.2612	17.3914	19.8065	17.7609	20.5243	22.2309	17.1855	18.7305	18.0935	17.5396	13.1181
DO365	18.2585	18.8658	19.6707	19.433	15.2803	20.3231	17.3528	19.8544	17.5435	20.411	22.2561	16.9614	18.9165	18.1946	17.9535	13.393
DO366	18.1936	18.6056	19.2823	18.7606	14.8908	19.9176	11.6711	19.4461	17.2684	20.3271	22.0057	17.2977	18.6421	17.9994	17.4766	13.0821
DO367	16.866	18.192	19.2532	18.888	14.982	20.2524	17.3755	19.4724	17.2175	20.6091	22.174	16.7445	18.7251	18.0517	18.0839	12.8408
DO368	18.1971	18.566	19.3842	19.1382	15.5444	20.0449	17.2208	19.6541	17.2633	20.4074	22.0951	16.5854	18.8279	17.7728	17.7517	13.1107
DO369	18.1137	18.533	19.4958	19.2781	15.0698	20.0463	17.0736	19.5328	17.3237	20.1965	21.9578	16.7006	18.1479	17.8817	17.7149	13.1011
DO370	18.0526	18.3697	19.1396	18.8886	15.0162	20.0213	17.228	19.5562	17.2761	20.3367	21.9464	16.5788	18.6827	17.5975	17.4099	13.1727
DO371	18.6285	18.9816	19.8188	19.6058	15.5912	20.494	17.5044	20.0283	17.8049	20.6724	22.333	17.4906	19.2125	18.3476	18.051	13.3492
DO372	18.871	19.4118	19.9925	19.7838	15.8159	20.7937	17.9028	20.3095	18.1722	20.9771	22.6001	17.8876	19.2753	18.9634	18.2817	13.3206
DO373	18.4198	18.9653	19.8892	19.3783	15.6177	20.3345	17.5056	19.8663	17.5581	20.5385	22.3439	16.9828	18.4087	17.8916	17.89	13.1463
DO374	17.7428	18.1085	19.5016	19.1756	15.0007	20.0631	11.8868	19.6104	17.3011	20.2908	22.0511	16.9501	18.6154	17.9304	17.4698	12.8385
DO375	18.3618	18.9476	19.7062	19.6848	15.1848	20.5246	17.3514	20.1817	18.0119	20.8568	22.346	10.4654	19.5437	19.4585	17.9565	13.3713
DO376	18.1225	18.4606	19.6077	19.2315	15.1271	20.195	17.1577	19.6265	17.4415	20.3297	22.1286	16.9189	18.8174	17.843	17.9098	12.5542
DO377	17.3321	18.9432	19.9434	19.9324	15.4479	20.6321	17.5005	20.0673	17.7337	20.9433	22.4239	10.4791	19.6157	19.5086	18.0995	13.2598
DO378	18.7813	19.0361	19.6935	19.5359	15.1238	20.3149	17.2736	19.6483	17.4332	20.3744	22.201	17.1742	18.8985	17.8804	18.0045	12.8651
DO379	18.548	19.2326	19.8796	19.5364	15.5925	20.5084	17.5568	20.0314	17.781	20.694	22.3348	17.5094	18.5628	18.4378	18.1003	13.2392
DO380	18.3087	18.9871	19.6881	19.2556	15.4517	20.2331	17.4488	19.9204	17.6317	20.5501	22.1898	16.6257	18.9319	17.831	17.6129	13.4335
DO381	18.0398	18.7111	19.5125	19.2138	15.2246	20.2691	17.3113	19.8378	17.5758	20.3934	22.1577	17.1263	18.1738	17.757	17.7112	13.1173
DO382	18.278	19.1331	19.587	19.1981	14.3656	20.0407	11.6256	19.6706	17.4439	20.241	22.2584	17.1207	18.8413	18.3023	17.7787	13.2506
DO383	18.5111	18.5942	19.7046	19.4125	14.8532	20.3131	17.2719	19.6353	17.3692	20.3443	22.1515	16.9835	18.8325	17.7774	17.9761	12.7979
DO384	18.2493	18.9553	19.9579	20.0184	15.1585	20.7737	17.5934	20.3198	18.1583	20.9459	22.4725	10.0713	19.8018	19.7824	18.2448	13.3868
DO385	17.9046	19.22	19.4672	19.0455	15.4288	20.2344	17.5543	19.8048	17.6763	20.7935	22.2428	17.1225	18.878	18.1152	17.1866	13.563
DO386	18.5248	19.1978	19.5975	19.3802	14.8947	20.2473	11.8561	19.8542	17.5095	20.402	22.1135	17.4269	18.3208	18.0721	17.7523	13.4331
DO387	17.9683	18.7221	19.7335	19.4242	15.2779	20.435	17.5048	19.7025	17.4253	20.6043	22.5033	17.3696	18.4787	18.0135	18.1223	13.0855
DO388	18.6724	19.1511	19.5225	19.2456	15.0014	20.0719	17.0831	19.4747	17.2422	20.1712	21.9672	17.1668	18.1575	17.9013	17.6331	13.3122
DO389	18.7503	18.9092	19.6504	19.2595	15.1202	20.2622	17.2393	19.7338	17.5609	20.2578	22.2449	17.3008	18.4048	18.0525	17.9245	12.9985
DO390	18.0988	19.1259	19.8689	19.4647	15.3821	20.4228	17.4644	19.5108	17.265	20.6626	22.3668	17.1501	18.5706	18.0925	18.0965	13.1798
DO391	17.6527	18.4023	19.5557	19.128	14.6975	20.1302	17.2461	19.6401	17.1051	20.3854	22.2597	16.8744	18.8431	17.8952	17.9836	13.2148
DO392	18.7858	18.9771	19.7865	19.121	15.8739	20.3539	12.0224	20.3183	17.9567	20.9248	22.4018	9.87726	19.7224	19.1795	17.8959	13.1743
DO393	18.0809	18.4498	19.4169	19.0435	15.4919	20.3156	17.64	19.717	17.4125	20.7069	22.3858	16.6967	18.8644	17.9012	17.5058	13.0688
DO394	18.2259	18.64	19.6286	19.4015	15.4374	20.3839	17.5513	19.7955	17.4989	20.6654	22.2981	17.4122	19.0873	18.3509	18.1155	13.0617
DO395	18.6028	18.7863	19.5978	19.2371	14.9362	20.2859	11.931	19.5757	17.3397	20.4728	22.2614	17.5688	18.8611	18.1223	17.8508	12.8973
DO396	18.51	18.8895	19.2831	18.8845	15.2332	20.1224	17.2739	19.638	17.5807	20.3791	22.0339	17.2771	18.6405	18.0124	17.4964	12.9805
DO397	18.7386	18.9631	19.0577	18.6804	14.9197	19.995	17.1873	19.4952	17.5654	20.3214	22.1033	17.0066	18.6743	18.0766	17.4548	12.9508
DO398	18.2279	18.3563	19.0984	18.7633	14.747	19.882	17.0521	19.3342	17.0075	20.1761	22.0132	16.5731	17.9756	17.6407	17.4109	12.8024
DO399	17.9902	18.5096	19.7164	19.1861	14.9568	20.175	12.0086	19.7341	17.545	20.4269	22.3463	17.4075	18.8553	17.9844	17.6652	13.0459
DO400	18.6938	19.6954	19.9647	19.5662	15.7344	20.5366	12.2141	20.0328	17.8657	20.7553	22.495	17.2868	19.071	18.3796	18.2834	13.5638
DO401	18.5516	18.9447	19.5981	19.5031	15.093	20.4215	17.316	19.8689	17.7055	20.3822	22.2103	17.4004	19.0204	18.2376	17.9843	12.967
DO402	17.9772	18.8169	19.5737	19.02	14.9068	20.338	17.5322	19.9073	17.6566	20.6629	22.3621	17.1895	18.8727	18.005	17.4782	13.3655
DO403	18.157	18.6788	19.6736	19.3414	14.7115	20.1158	16.9357	19.7871	17.725	20.4714	22.1665	10.2385	19.3557	19.09	17.7021	13.173
DO404	18.7122	19.0989	19.6328	19.5824	14.9092	20.2808	17.1401	19.7806	17.722	20.618	22.1386	10.2266	19.1665	19.1227	17.6837	13.1245
DO405	18.4305	18.9168	19.3521	19.112	14.8868	20.1412	11.865	19.5965	17.374	20.2443	22.0214	17.2906	18.6022	18.0359	17.5588	13.176
DO406	18.2657	18.3943	19.6821	19.2863	15.305	20.2847	17.4017	19.7022	17.4395	20.4686	22.3158	17.1538	18.8262	17.9672	17.8296	12.8812
DO407	17.8774	19.2084	20.1382	19.8385	15.6988	20.6875	17.7081	20.3598	18.0837	20.7921	22.3961	17.4025	19.2754	18.3401	18.181	13.6264
DO408	18.4262	18.8569	19.6604	19.264	15.5851	20.4533	17.634	19.7026	17.6377	20.6939	22.4312	17.6214	18.9674	18.4202	17.907	13.1998
DO409	18.4339	19.2367	19.7003	19.2695	15.2547	20.4571	17.7191	20.0273	17.8061	20.8198	22.3468	16.8545	18.8966	18.0886	17.7647	13.418
DO410	17.3978	18.4067	19.6626	19.3663	15.0496	20.3075	17.3504	19.5966	17.1901	20.4234	22.1227	16.9721	18.3111	18.0423	17.883	12.9747
DO411	18.0253	19.0868	19.6511	19.3213	15.3338	20.48	17.6993	20.0221	17.9043	20.8454	22.4514	16.9221	18.9465	18.3124	17.8655	13.3136
DO412	19.9349	19.5662	19.2843	19.042	15.3099	20.266	17.2241	19.4596	17.2887	20.5627	22.192	17.5208	18.8741	18.6112	17.8804	13.1667
DO413	18.932	19.0591	19.8527	19.4768	15.3253	20.3386	12.0075	19.8532	17.5444	20.5048	22.2399	17.4995	18.9489	18.2693	18.0031	13.2164
DO414	18.0406	19.1517	19.4458	18.8998	15.2247	20.0846	17.3716	19.7714	17.7032	20.4718	22.0837	17.0598	18.7426	18.1872	17.2488	13.4042
DO415	18.7618	19.155	19.5846	19.1778	15.4508	20.4717	17.59	19.9142	17.7693	20.8347	22.4865	17.4059	19.0363	18.2602	18.0134	13.3917
DO416	19.3119	19.3593	19.7669	19.7677	15.1337	20.6602	17.4307	20.1271	17.76	20.7986	22.2428	10.4534	19.5481	19.4891	18.0346	13.3925
DO417	18.4602	18.8975	19.4556	19.3547	15.2809	20.2623	17.5261	19.7931	17.5188	20.5843	22.1409	16.9985	18.2154	17.9048	17.6022	13.0743
DO420	18.3782	19.001	19.78	19.4953	15.4244	20.5066	17.6929	20.2243	17.9889	20.6919	22.3293	17.0213	18.9188	18.2837	18.0465	13.5201
DO461	17.9183	18.6465	19.3455	18.7648	14.85	20.0503	17.2386	19.7221	17.564	20.3821	22.1013	17.2018	18.639	17.9532	17.1786	13.0231
DO462	17.2732	18.202	19.526	19.2142	14.8854	20.0921	17.1181	19.2683	16.8596	20.1522	21.9866	17.1431	18.0277	17.8628	17.8804	12.8195
DO463	17.2498	18.5867	19.8571	19.6627	15.3487	20.5732	17.6215	19.8835	17.3895	20.6981	22.3459	17.2117	18.4792	18.2424	18.1662	13.2067
DO464	19.0432	19.7378	19.8822	19.9226	15.2932	20.6079	17.4044	20.1901	18.0822	20.8987	22.3533	10.3763	19.616	19.54	18.2024	13.3665
DO465	18.5291	18.9487	19.6133	19.5259	14.6225	20.1859	17.0805	19.8415	17.6727	20.6322	22.1234	9.63025	19.3653	19.1223	17.8592	13.1519
DO466	18.1222	18.0045	19.2217	19.2202	14.6784	20.3261	12.0901	19.6522	17.3353	20.4387	22.0951	17.017	18.6098	17.9429	17.5132	12.7694
DO467	18.1308	19.0022	19.6333	19.3101	15.556	20.3782	17.6509	20.0192	17.848	20.8396	22.2026	17.503	18.9089	18.2838	17.6497	13.5151
DO468	18.365	18.5708	19.4805	19.5199	14.517	20.2468	17.1326	19.8084	17.5662	20.6994	22.1821	9.55995	19.4263	19.1001	17.6405	13.045
DO469	17.4721	18.2023	18.9935	18.7432	14.7962	19.913	17.0067	19.3498	16.9151	20.2716	21.9473	16.5657	17.895	17.5341	17.5939	12.8972
DO470	17.1361	18.4987	19.9184	19.8938	15.3748	20.6767	12.2295	19.9039	17.5812	20.7347	22.428	18.1877	18.6013	18.5618	18.428	12.7757
DO471	18.0437	18.8698	19.3514	19.2879	15.1393	20.1982	17.315	19.4826	17.1641	20.4505	22.023	16.8883	18.2791	18.1668	17.8473	13.1513
DO472	18.0551	18.2976	19.1105	18.5212	14.842	19.7964	17.1422	19.2464	17.1737	20.3171	22.0304	16.7833	18.4941	17.4744	16.8805	13.0372
DO473	17.7315	18.5903	19.2925	18.8366	15.1246	20.0836	17.2424	19.207	16.9833	20.3806	22.1736	17.2529	18.6506	17.9578	17.7689	12.8582
DO474	18.1866	18.7293	19.462	18.9106	15.0651	19.9575	17.2858	19.5893	17.5097	20.4249	22.0942	16.8117	18.6186	17.7027	17.0394	13.1746
DO475	17.1608	18.4473	19.2919	18.9044	14.9838	20.1312	17.4988	19.2751	16.9136	20.4894	22.1864	16.9411	18.6403	18.0218	17.5993	12.9771
DO476	18.4529	19.1652	19.6699	19.4742	14.4301	20.0695	17.0574	19.8238	17.6348	20.5938	22.0231	9.50187	19.1609	18.9216	17.3893	13.1642
DO477	18.4658	19.0441	19.3948	19.0282	15.3087	20.1615	17.459	19.9048	17.7771	20.5786	22.029	16.9004	18.7101	18.0844	17.3641	13.5335
DO478	18.7802	19.3452	19.5101	19.1253	15.1431	20.2546	17.2341	19.8165	17.75	20.4666	22.0337	17.8726	18.8247	18.5143	17.8003	13.2364
DO479	18.516	18.835	19.5983	19.444	14.9952	20.3992	17.3686	19.7425	17.5023	20.4262	22.0838	17.2428	18.2681	18.0729	17.935	13.2314
DO480	17.5296	18.1375	19.4968	19.3515	15.2103	20.2543	17.4233	19.7961	17.597	20.4513	22.1448	16.6474	18.7373	17.6622	17.6416	12.9187
DO481	17.7639	18.2797	19.6374	19.3087	15.0494	20.3183	17.2879	19.6349	17.3839	20.4633	22.2192	16.834	18.3323	17.9372	18.1834	13.0481
DO482	18.1102	18.458	19.1626	19.2167	13.9695	19.9136	16.7685	19.4045	17.2738	20.2743	21.8444	9.56504	18.9737	18.843	17.3246	12.8994
DO483	18.1236	18.7724	19.6	19.3551	15.3347	20.572	17.8523	20.0582	17.8381	20.9539	22.4604	16.8308	19.0096	18.1836	17.851	13.2284
DO484	18.7716	19.281	19.7488	19.4834	15.5912	20.3361	12.1454	20.1729	17.9161	20.5791	22.1226	17.2752	18.9249	18.508	17.752	13.3195
DO485	18.1308	18.6152	19.4622	18.9818	15.2967	20.1649	17.3415	19.4919	17.5371	20.5612	22.2634	17.3534	18.7698	18.1059	17.3553	13.0639
DO486	17.8704	18.9415	19.4486	19.2036	15.2557	20.2994	17.4462	19.7597	17.6999	20.5234	22.084	17.3345	18.7744	18.331	17.6615	13.1879
DO487	17.749	18.545	19.6556	19.5056	14.9679	20.2958	11.9889	19.6598	17.3557	20.4233	22.1317	17.4916	18.2624	17.9345	17.9211	13.257
DO488	18.6851	18.9773	19.5781	19.075	15.3263	19.9063	16.9822	19.4893	17.5596	19.9937	22.1115	16.7794	18.2635	17.9604	17.7521	13.2393
DO489	17.9876	19.4193	19.7202	19.4663	14.9338	20.3395	17.1294	19.8691	17.4971	20.7161	22.2864	10.0088	19.5589	19.4078	17.9716	13.4433
DO490	18.8862	19.1688	19.7865	19.5894	15.438	20.4448	12.0821	20.1076	17.9225	20.5743	22.2326	17.7368	19.0084	18.5689	18.0084	13.4086
DO491	17.8374	18.3997	19.3933	19.0916	14.9229	20.0679	11.9225	19.6416	17.3959	20.3129	22.0362	17.2196	18.6694	17.8809	17.4349	13.1055
DO492	17.8472	18.706	19.4605	18.925	15.4024	20.2039	17.4775	19.9487	17.8552	20.7419	22.1503	16.9089	18.7739	18.0094	17.1553	13.4738
DO493	18.5696	19.089	19.7528	19.5953	14.8541	20.4829	17.3605	20.3232	18.2134	20.8866	22.3955	10.3353	19.6107	19.3498	17.6875	13.4362
DO494	18.0604	18.4749	19.6417	19.461	15.0209	20.2837	11.8304	19.8719	17.6877	20.4083	22.0202	17.8771	18.3408	18.2507	17.859	13.2749
DO495	18.1565	18.7922	19.5754	19.4458	15.2629	20.4293	12.0258	19.8073	17.6411	20.4945	22.16	17.8113	18.413	18.1273	17.9426	13.2366
DO496	18.2449	18.3075	19.2724	18.7878	14.7235	19.9104	17.1008	19.4189	17.1658	20.274	22.1308	16.7673	18.1637	17.4689	17.5325	12.8832
DO497	17.9012	18.2803	19.064	18.8518	14.4482	19.6507	11.5635	19.135	16.8135	19.9871	21.8413	16.9756	18.2886	17.7755	17.2575	12.822
DO498	17.763	18.9456	19.5852	19.2497	15.605	20.1997	12.2281	19.8055	17.3208	20.5378	22.209	17.646	18.1489	17.6776	17.49	13.3449
DO499	17.8159	18.4313	19.5559	19.2279	15.1254	20.248	11.9702	19.7145	17.4635	20.3417	22.0802	17.5709	18.1982	17.7998	17.8231	13.1491
DO500	17.886	18.6488	19.7155	19.4999	14.7981	20.1655	17.0731	19.7334	17.637	20.5552	22.1403	10.2776	19.3142	19.109	17.6332	13.0818
DO501	17.4981	18.5655	19.5615	19.0638	15.113	20.1657	17.4438	19.663	17.3682	20.54	22.1781	17.2412	18.7461	18.0277	17.2977	13.3888
DO502	17.9028	18.7481	19.7271	19.2129	15.1377	20.2188	17.3509	19.7557	17.4919	20.4627	22.1749	17.2677	18.2676	17.7838	17.878	13.2595
DO503	17.8523	18.6039	19.4489	19.0606	15.1227	19.9437	17.0382	19.4846	17.3076	20.1667	21.8988	17.0907	18.709	17.9592	17.7196	13.2266
DO504	18.2206	18.8661	19.6226	19.2569	15.3478	20.3158	17.3105	19.9484	17.7563	20.442	22.1597	17.069	18.9584	18.1676	17.9883	13.4041
DO505	18.1064	19.0379	19.9157	19.7132	14.9171	20.4848	17.474	20.2785	18.0661	20.8589	22.4199	9.80336	19.5431	19.4296	17.7143	13.3618
DO506	17.6029	18.0909	19.3523	18.9419	14.9795	20.0717	17.1887	19.6398	17.3696	20.3519	22.0875	16.5698	18.6771	17.7546	17.5992	13.0612
DO507	17.9525	18.8032	19.5284	19.0491	14.9822	20.263	17.5546	19.72	17.6096	20.5696	22.275	17.2244	18.7109	18.145	17.5212	13.361
DO508	18.5379	19.0785	19.6788	19.0847	15.1659	20.1657	17.4144	19.8366	17.8127	20.5904	22.2595	17.0126	18.8507	18.047	17.5249	13.1983
DO510	18.3807	18.9312	19.257	18.7778	14.969	19.9482	17.2447	19.4214	17.4296	20.3646	22.0493	17.2152	18.5924	17.9762	17.2788	13.37
DO511	18.8027	18.9562	19.3614	18.8623	15.2816	20.0556	17.383	19.5842	17.5344	20.43	22.1199	17.2323	18.6527	17.793	17.1887	13.1649
DO512	18.0112	18.7918	19.6239	19.3023	15.5019	20.5436	17.8133	20.0112	17.9233	20.8511	22.4875	17.2222	19.0563	18.2198	17.5691	13.2199
DO513	18.1308	18.7304	19.7418	19.0348	15.7167	20.2387	11.8548	20.1176	17.749	20.7514	22.1829	10.8899	19.5492	19.0684	17.4494	13.3714
DO514	18.2077	18.8521	19.6534	19.4241	15.4747	20.4531	12.2715	19.9806	17.6859	20.5407	22.241	17.3705	18.9964	18.2162	17.9022	13.3312
DO515	18.1763	19.1657	19.855	19.3475	15.7009	20.5227	17.6975	19.6089	17.2467	20.8009	22.6726	16.9898	19.0289	17.9811	18.1338	13.1569
DO516	18.3943	18.6279	19.6365	19.1646	15.1326	20.1043	17.2133	19.3392	17.049	20.3867	22.3112	16.9207	18.8353	17.6296	17.7945	13.0258
DO517	17.6617	19.1701	19.9174	19.6836	15.1542	20.3721	12.0091	19.7047	17.3054	20.3488	22.1268	17.5821	18.887	18.5199	17.996	13.4273
DO518	19.2425	19.4872	19.857	19.6196	15.4186	20.4885	12.1321	19.9594	17.806	20.6779	22.3171	17.5081	19.091	18.5256	18.2113	13.4666
DO519	18.0205	18.8394	19.7045	19.2962	15.3596	20.3577	17.5719	20.1273	17.8018	20.727	22.2834	16.7111	19.0118	17.9338	17.8501	13.3502
DO520	18.8053	19.3047	19.8231	19.3793	15.3035	20.4232	12.2121	19.9097	17.6333	20.7038	22.5264	17.3705	19.0089	18.2228	18.0653	13.366
DO521	18.4674	18.8184	19.6694	19.3988	15.516	20.3297	17.3851	19.8497	17.5857	20.3771	22.2129	16.8844	18.9675	17.8946	17.9834	13.1757
DO522	17.8768	18.5916	19.5275	19.205	15.2571	20.1965	17.2425	19.7855	17.5493	20.3908	22.2397	17.2877	18.3708	18.0154	17.7594	13.2744
DO523	18.188	18.8392	19.9416	19.5116	15.785	20.4269	17.5376	19.9975	17.7081	20.6018	22.3005	17.3267	19.1875	18.171	18.0233	13.3019
DO524	18.3381	18.6535	19.4232	19.2749	15.2115	20.2092	12.068	19.5639	17.265	20.4994	22.1024	17.0545	18.7245	17.862	17.6729	13.2046
DO525	17.4083	18.2503	19.5373	19.2731	15.1556	20.3407	12.1886	19.5234	16.9968	20.5137	22.2206	17.0053	18.8157	17.9326	17.7457	13.1855
DO526	17.7285	18.8552	19.8047	19.5058	15.4658	20.6244	17.9146	19.9754	17.8235	20.9691	22.5324	17.0561	19.0689	18.3576	18.0503	13.4114
DO527	18.1501	18.7712	19.4022	19.0476	15.0893	20.3887	17.6465	19.7148	17.681	20.696	22.3196	16.99	18.9045	18.2405	17.735	13.1871
DO528	17.8908	19.2339	19.787	19.3318	15.5076	20.3574	17.6612	19.9291	17.5439	20.7923	22.2266	16.8461	18.8908	18.1786	17.7298	13.4956
DO529	18.7084	18.9036	19.5832	19.1812	15.5072	20.3458	17.5403	19.7447	17.6057	20.6638	22.364	17.4322	19.0266	18.2655	17.7338	13.3164
DO530	18.0073	18.3915	19.6757	19.5569	14.4796	20.3001	17.2607	19.9083	17.7575	20.7258	22.2808	9.61484	19.4399	19.1995	17.5293	13.1688
DO531	18.1839	18.7283	19.6548	19.3475	15.2002	20.2508	11.9393	19.7694	17.4851	20.5582	22.2137	16.8954	18.9484	18.0666	17.8895	13.0759
DO532	18.4528	19.1299	19.5288	19.1566	15.4082	20.1712	17.4691	19.7826	17.6776	20.6606	22.153	16.9681	18.8279	18.0461	17.306	13.3117
DO533	18.7365	19.2373	19.739	19.4636	15.7525	20.6309	17.8555	20.274	18.1493	20.9595	22.5147	17.115	19.1177	18.5934	17.9842	13.4557
DO534	17.9761	19.1219	19.6365	19.228	15.6463	20.324	17.6524	19.8532	17.7678	20.839	22.406	17.0334	18.9375	18.0726	17.3546	13.2979
DO535	19.1227	19.1422	19.7584	19.5594	15.3276	20.5241	17.6744	19.7898	17.4426	20.6764	22.4116	16.8472	19.0384	18.4384	18.2212	13.2787
DO536	17.8807	18.6528	19.7451	19.4289	15.6487	20.4589	17.7966	19.8535	17.6423	20.9807	22.4509	17.2137	18.8878	17.8674	17.4681	13.0282
DO537	18.0853	18.7437	19.6016	19.6817	14.7308	20.4999	17.349	19.9551	17.7441	20.7648	22.1741	9.91423	19.5412	19.4308	17.9677	13.2914
DO538	18.1043	19.1083	19.9507	19.5587	15.8562	20.4747	17.4903	20.2332	18.0559	20.6674	22.4294	17.3731	18.6365	18.3691	18.1317	13.5967
DO539	17.8928	19.3991	20.3338	20.2097	15.905	21.058	18.0316	20.4539	18.1431	21.1212	22.7586	17.842	19.5719	18.8971	18.7373	13.5473
DO540	17.7065	18.9437	19.8523	19.5553	15.6954	20.7903	17.9175	20.2066	17.9146	21.13	22.4667	17.0959	19.1796	18.5046	18.3693	13.1847
DO541	18.0173	18.9946	19.3978	19.1108	15.3342	20.2153	17.4793	19.6025	17.5653	20.5949	22.2482	17.2288	18.8342	18.1632	17.5644	12.9496
DO542	18.8669	18.8461	19.6044	19.3577	15.2186	20.4636	17.3548	19.8523	17.6205	20.5001	22.2726	17.2443	19.153	18.1824	18.0333	12.8717
DO543	19.0618	19.5599	19.6829	19.4259	15.3199	20.282	12.0335	19.8793	17.5135	20.5974	22.1911	17.3126	18.968	18.2186	17.8183	13.352
DO544	17.8717	18.7335	19.8133	19.5714	15.1558	20.6677	12.2726	20.2252	17.8961	20.6253	22.3324	17.551	18.896	18.5254	17.9328	13.483
DO545	18.1018	19.0174	19.7093	19.4952	15.264	20.3108	12.1409	20.0022	17.7736	20.5126	22.1584	17.4764	18.904	18.3454	17.5768	13.3583
DO546	19.0168	19.1421	19.7662	19.4665	15.7248	20.4532	12.3032	20.1058	17.7334	20.7455	22.393	17.2527	19.0848	18.404	17.944	13.5503
DO547	18.7145	19.0339	19.8778	19.4342	15.324	20.3842	17.4325	19.5959	17.3077	20.53	22.3913	17.4931	19.1886	18.2059	18.0619	13.1094
DO548	18.1906	18.7296	19.7818	19.5357	15.2139	20.4367	17.4602	19.6591	17.3458	20.6059	22.4301	16.8442	19.1619	17.9628	18.3387	13.0885
DO549	17.2458	17.1007	19.2805	18.6842	15.2712	19.9229	11.4007	19.4309	16.9734	20.3836	21.9386	9.75609	19.0755	18.6739	17.3983	12.6885
DO550	17.8359	18.8845	19.7515	19.5214	15.279	20.5407	12.1125	19.9707	17.6372	20.5918	22.3141	17.1829	18.9701	18.4735	18.1964	13.3728
DO551	18.5633	19.0868	20.0015	19.922	15.1547	20.6316	17.5254	20.1634	18.0156	20.9941	22.3661	9.95115	19.7324	19.5677	18.1796	13.3865
DO552	17.3612	18.4397	19.5087	19.1974	14.8504	20.2764	12.0615	19.5228	16.9721	20.3484	22.2992	17.6773	18.3296	18.0026	17.7966	13.1415
DO553	18.386	18.5726	19.3436	18.8822	14.9048	19.9774	17.0605	19.3149	17.0023	20.193	22.0396	16.5357	18.1936	17.694	17.7072	13.0407
DO554	18.184	18.9602	19.8489	19.3444	15.2431	20.2155	17.2565	19.622	17.3969	20.3737	22.2884	17.031	19.0959	18.0433	18.1602	13.1815
DO555	18.5733	18.7987	19.1225	18.7065	15.054	19.8841	17.1956	19.3333	17.4158	20.2374	22.0898	17.0109	18.5206	17.895	17.1633	12.9654
DO556	18.3227	18.1918	19.2848	18.9151	14.7642	20.0433	17.093	19.5009	17.3362	20.2618	22.016	17.1907	18.1396	17.836	17.4877	12.9361
DO557	18.5323	19.032	19.8196	19.6858	14.8383	20.4938	17.3536	20.203	18.1326	20.7991	22.3201	10.0681	19.5547	19.3675	17.8516	13.3539
DO558	18.3665	18.5298	19.97	19.89	14.8488	20.7558	17.679	20.3523	18.0871	21.1085	22.4387	9.84262	19.7346	19.4056	18.027	13.2846
DO559	17.0149	18.4933	19.8596	19.517	15.2402	20.6	17.7744	19.9526	17.4757	20.7557	22.4579	16.7581	19.1767	17.9759	18.2274	13.4648
DO560	17.9285	19.0996	19.8471	19.165	14.9005	20.2083	17.4225	19.7943	17.6404	20.6374	22.387	17.208	18.9081	18.2157	17.7148	13.456
